# Supplementary material for: Cross-ancestry GWAS meta-analysis identifies six breast cancer loci in African and European ancestry women
Source: PubMed Central journal article supplement (PMC8263739; doi:10.1038/s41467-021-24327-x), 2021-07-07
Supplement: 41467_2021_24327_MOESM1_ESM.pdf [file 41467_2021_24327_MOESM1_ESM.pdf]

## Supplementary Materials

### Supplementary Authorship

The GBHS Study Team

| <b>Institution and name</b>                                  | <b>Position</b>                        | <b>Email</b>                                                                                                               |
|--------------------------------------------------------------|----------------------------------------|----------------------------------------------------------------------------------------------------------------------------|
| <i>Korle Bu Teaching Hospital, Accra, Ghana (KBTH):</i>      |                                        |                                                                                                                            |
| Prof. Joe Nat Clegg-Lamptey                                  | <b>Surgery (PI)</b>                    | <a href="mailto:clegglamptey@hotmail.com">clegglamptey@hotmail.com</a>                                                     |
| Dr. Florence Dedey                                           | Surgery                                | <a href="mailto:flodedey@yahoo.com">flodedey@yahoo.com</a>                                                                 |
| Dr. Lawrence Edusei                                          | Pathology                              | <a href="mailto:dredusei@yahoo.com">dredusei@yahoo.com</a>                                                                 |
| Dr. Verna Vanderpuyey                                        | Radiotherapy and Oncology              | <a href="mailto:vanaglat@yahoo.com">vanaglat@yahoo.com</a> ;<br><a href="mailto:vanaglat@gmail.com">vanaglat@gmail.com</a> |
| Dr. Joel Yarney                                              | <b>Radiotherapy and Oncology (PI)</b>  | <a href="mailto:kodwoahen@gmail.com">kodwoahen@gmail.com</a>                                                               |
| Evelyn Tay                                                   | Project coordinator                    | <a href="mailto:ghanaprs@africaonline.com.gh">ghanaprs@africaonline.com.gh</a>                                             |
| Naomi Oyoe Ohene Oti                                         | Oncology Nurse/Cancer Registry Manager | <a href="mailto:naaoyoe2000@gmail.com">naaoyoe2000@gmail.com</a>                                                           |
| Victoria Okyne                                               | Study manager                          | <a href="mailto:ghprojects2004@gmail.com">ghprojects2004@gmail.com</a>                                                     |
| <i>University of Ghana, Accra, Ghana:</i>                    |                                        |                                                                                                                            |
| Prof. Richard Biritwum                                       | Statistician                           | <a href="mailto:biritwum@africaonline.com.gh">biritwum@africaonline.com.gh</a>                                             |
| Dr. Kofi Nyarko                                              | <b>Epidemiologist (PI)</b>             | <a href="mailto:konyarko22@yahoo.com">konyarko22@yahoo.com</a>                                                             |
| <i>Komfo Anoyke Teaching Hospital, Kumasi, Ghana (KATH):</i> |                                        |                                                                                                                            |
| Dr. Ernest Adjei                                             | Pathology                              | <a href="mailto:ernest24us@yahoo.com">ernest24us@yahoo.com</a>                                                             |
| Dr. Francis Aitpillah                                        | Surgery                                | <a href="mailto:fraitp@yahoo.com">fraitp@yahoo.com</a>                                                                     |
| Dr. Daniel Ansong                                            | <b>Epidemiologist (Co-PI)</b>          | <a href="mailto:ansongd@yahoo.com">ansongd@yahoo.com</a>                                                                   |
| Dr. Baffour Awuah                                            | <b>Oncology (PI)</b>                   | <a href="mailto:baff1470awuah@gmail.com">baff1470awuah@gmail.com</a>                                                       |
| Dr. Joseph Oppong                                            | Surgery                                | <a href="mailto:josephkoppong@yahoo.com">josephkoppong@yahoo.com</a>                                                       |
| Dr. Ernest Osei-Bonsu                                        | Oncology                               | <a href="mailto:ernest.bonsu@gmail.com">ernest.bonsu@gmail.com</a>                                                         |
| Dr. Nicholas Titiloye                                        | Pathology                              | <a href="mailto:waleht2000@yahoo.com">waleht2000@yahoo.com</a>                                                             |
| Isaac Boakye                                                 | Study manager                          | <a href="mailto:au347kb@yahoo.com">au347kb@yahoo.com</a>                                                                   |
| Bernard Arhin                                                | IT                                     | <a href="mailto:barhinn@gmail.com">barhinn@gmail.com</a>                                                                   |
| Marion Alcpaloo                                              | Head Nurse Breast Care Center          | <a href="mailto:Madejoe8@gmail.com">Madejoe8@gmail.com</a>                                                                 |
| <i>Peace and Love Hospital, Kumasi, Ghana:</i>               |                                        |                                                                                                                            |
| Dr. Beatrice Addai Wiafe                                     | <b>Surgery (PI)</b>                    | <a href="mailto:drwiafe@gmail.com">drwiafe@gmail.com</a>                                                                   |
| Dr. Seth Wiafe                                               | <b>Epidemiologist (Co-PI)</b>          | <a href="mailto:swiafe@llu.edu">swiafe@llu.edu</a>                                                                         |
| Margaret Frempong                                            | Study manager (PLH)                    | <a href="mailto:mtfrempong@gmail.com">mtfrempong@gmail.com</a>                                                             |

|                                                      |                                              |                                                                                        |
|------------------------------------------------------|----------------------------------------------|----------------------------------------------------------------------------------------|
| Emma Abaidoo                                         | Biological specimens/molecular biology (PLH) | <a href="mailto:emmaabaidoo@yahoo.com">emmaabaidoo@yahoo.com</a>                       |
| Prince Agyapong                                      | Data management (PLH)                        | <a href="mailto:thelastagyapong@gmail.com">thelastagyapong@gmail.com</a>               |
| <i>University of Edinburgh, Edinburgh, Scotland:</i> |                                              |                                                                                        |
| Dr. Jonine Figueroa                                  | Epidemiologist                               | <a href="mailto:jonine.figueroa@ed.ac.uk">jonine.figueroa@ed.ac.uk</a>                 |
| <i>U.S. National Cancer Institute, Bethesda, MD</i>  |                                              |                                                                                        |
| <b>Dr. Montserrat Garcia-Closas</b>                  | <b>Epidemiologist (PI)</b>                   | <a href="mailto:montserrat.garcia-closas@nih.gov">montserrat.garcia-closas@nih.gov</a> |
| Dr. Louise Brinton                                   | Epidemiologist                               | <a href="mailto:brinton6610@gmail.com">brinton6610@gmail.com</a>                       |
| Dr. Thomas Ahearn                                    | Epidemiologist                               | <a href="mailto:thomas.ahearn@nih.gov">thomas.ahearn@nih.gov</a>                       |
| Michelle Brotzman                                    | Study manager (formerly at Westat)           | <a href="mailto:michelle.brotzman@nih.gov">michelle.brotzman@nih.gov</a>               |
| <i>Westat, Inc., MD, USA</i>                         |                                              |                                                                                        |
| Ann Truelove                                         | Study manager, Westat                        | <a href="mailto:AnnTruelove@westat.com">AnnTruelove@westat.com</a>                     |

**Supplementary Table S1: Consortia contributing to the meta-analysis**

| <b>Consortium/Study</b>                                                                | <b>Total</b> | <b>Controls</b> | <b>Cases</b> | <b>ER positive</b> | <b>ER negative</b> | <b>Genotyping platform</b>                            |
|----------------------------------------------------------------------------------------|--------------|-----------------|--------------|--------------------|--------------------|-------------------------------------------------------|
| <b>African ancestry</b>                                                                |              |                 |              |                    |                    |                                                       |
| AABC                                                                                   | 5727         | 2720            | 3007         | 1518               | 987                | IlluminaHuman1M-Duo BeadChip                          |
| BCAC (OncoArray)                                                                       | 3677         | 1406            | 2271         | 1130               | 613                | Illumina Infinium OncoArray-500K BeadChip             |
| AMBER                                                                                  | 3815         | 2408            | 1407         | 952                | 385                | Illumina Human Exome Beadchip v1.1 Mega array         |
| Ghana Study                                                                            | 2529         | 1630            | 899          | 296                | 277                | Infinium Global Screening Array-24                    |
| ROOT                                                                                   | 3686         | 2029            | 1657         | 403                | 374                | Illumina HumanOmni2.5-8v1 array                       |
| Total                                                                                  | 19434        | 10193           | 9241         | 4299               | 2636               |                                                       |
| <b>European ancestry</b>                                                               |              |                 |              |                    |                    |                                                       |
| BCAC GWAS                                                                              | 32498        | 17588           | 14910        | 4226               | 4480               | Illumina 370K/550K/610K/670K/1.2M, Affymetrix 5.0/6.0 |
| BCAC iCOGs                                                                             | 89677        | 42892           | 46785        | 27078              | 7333               | Illumina iSelect Genotyping Array                     |
| BCAC Oncoarray                                                                         | 106776       | 45494           | 61282        | 38197              | 9655               | Illumina Infinium OncoArray-500K BeadChip             |
| Total                                                                                  | 228951       | 105974          | 122977       | 69501              | 21468              |                                                       |
| <b>ROOT Consortium contributing studies</b>                                            |              |                 |              |                    |                    |                                                       |
| NBCS - Nigerian Breast Cancer Study                                                    | 1335         | 624             | 711          | 42                 | 99                 |                                                       |
| BNCS - Barbados National Cancer Study                                                  | 321          | 229             | 92           |                    |                    |                                                       |
| RVGBC - Racial Variability in Genotypic Determinants of Breast Cancer Study            | 402          | 257             | 145          | 27                 | 25                 |                                                       |
| CCPS - Chicago Cancer Prone Study                                                      | 781          | 387             | 394          | 171                | 140                |                                                       |
| BBCS - Baltimore Breast Cancer Study                                                   | 197          | 102             | 95           | 45                 | 44                 |                                                       |
| SCCS - Southern Community Cohort Study                                                 | 650          | 430             | 220          | 118                | 66                 |                                                       |
| <b>AABC Consortium contributing studies</b>                                            |              |                 |              |                    |                    |                                                       |
| MEC - Multiethnic Cohort Study                                                         | 1667         | 976             | 691          | 407                | 176                |                                                       |
| CARE - Women's Contraceptive and Reproductive Experiences Study, Los Angeles component | 568          | 212             | 356          | 183                | 129                |                                                       |
| WCHS - Women's Circle of Health Study                                                  | 497          | 236             | 261          | 131                | 80                 |                                                       |
| SFBCS - San Francisco Bay Area Breast Cancer Study                                     | 382          | 218             | 164          | 84                 | 50                 |                                                       |
| NC-BCFR - Northern California site of the Breast Cancer Family Registry                | 470          | 50              | 420          | 218                | 121                |                                                       |
| CBCS - Carolina Breast Cancer Study                                                    | 1224         | 589             | 635          | 272                | 317                |                                                       |
| PLCO - Prostate, Lungs, Colorectal and Ovarian Cancer Screening Trial Cohort           | 172          | 116             | 56           | 14                 | 6                  |                                                       |
| NBHS - Nashville Breast Health Study                                                   | 485          | 181             | 304          | 143                | 65                 |                                                       |
| WFBC - Wake Forest University Breast Cancer Study                                      | 262          | 142             | 120          | 66                 | 43                 |                                                       |
| <b>AMBER Consortium</b>                                                                |              |                 |              |                    |                    |                                                       |
| BWHS - Black Women's Health Study                                                      | 2466         | 2154            | 312          | 206                | 64                 |                                                       |
| CBCS - Carolina Breast Cancer Study                                                    | 607          | 1               | 606          | 407                | 186                |                                                       |
| WCHS - Women's Circle of Health Study                                                  | 742          | 253             | 489          | 339                | 135                |                                                       |
| <b>BCAC (OncoArray) African ancestry</b>                                               |              |                 |              |                    |                    |                                                       |
| 2SISTER - The Two Sister Study                                                         | 45           | 0               | 45           | 16                 | 28                 |                                                       |
| MEC - Multiethnic Cohort Study                                                         | 1329         | 700             | 629          | 138                | 413                |                                                       |
| CBCS - Carolina Breast Cancer Study                                                    | 975          | 64              | 911          | 299                | 504                |                                                       |
| WAABCS - West African Ancestry Breast Cancer Study                                     | 622          | 309             | 313          | 63                 | 21                 |                                                       |
| NC-BCFR, The Northern California Breast Cancer Family Registry                         | 80           | 1               | 79           | 28                 | 40                 |                                                       |
| NBHS - The Nashville Breast Health Study                                               | 146          | 59              | 87           | 40                 | 17                 |                                                       |

|                                                                                 |     |     |     |    |    |
|---------------------------------------------------------------------------------|-----|-----|-----|----|----|
| PLCO - Prostate, Lungs, Colorectal and<br>Ovarian Cancer Screening Trial Cohort | 93  | 68  | 25  | 2  | 13 |
| SISTER - The Sister Study                                                       | 319 | 166 | 153 | 27 | 94 |
| USRT - The U.S. Radiologic<br>Technologists                                     | 68  | 39  | 29  |    |    |

---

**Table S2. Association results of 6 loci in each study of African ancestry**

| SNP         | Locus   | Position  | Test | Other               | Dataset | OVERALL |                    |         | ER Negative |                    |         |
|-------------|---------|-----------|------|---------------------|---------|---------|--------------------|---------|-------------|--------------------|---------|
|             |         |           |      |                     |         | TAF     | OR(95% CI)         | P value | TAF         | OR (95% CI)        | P value |
| rs17024629  | 1p13.3  | 110179756 | T    | C                   | All     | 0.13    | 0.88 (0.83 - 0.95) | 0.00052 | 0.13        | 0.83 (0.74 - 0.92) | 0.00064 |
|             |         |           |      |                     | AMBER   | 0.13    | 0.83 (0.67 - 1.02) | 0.082   | 0.13        | 0.69 (0.48 - 0.99) | 0.044   |
|             |         |           |      |                     | ROOT    | 0.13    | 0.92 (0.80 - 1.06) | 0.27    | 0.13        | 0.92 (0.72 - 1.18) | 0.53    |
|             |         |           |      |                     | BCAC    | 0.14    | 0.86 (0.74 - 0.99) | 0.033   | 0.14        | 0.81 (0.65 - 1.01) | 0.059   |
|             |         |           |      |                     | AABC    | 0.12    | 0.92 (0.82 - 1.03) | 0.16    | 0.13        | 0.86 (0.72 - 1.02) | 0.085   |
|             |         |           |      |                     | Ghana   | 0.11    | 0.84 (0.68 - 1.04) | 0.11    | 0.11        | 0.73 (0.51 - 1.03) | 0.065   |
| rs67931591  | 1q41    | 215330292 | G    | GCTGAGG-<br>CAGGAGA | All     | 0.28    | 0.95 (0.90 - 1.00) | 0.034   | 0.29        | 0.92 (0.85 - 0.99) | 0.024   |
|             |         |           |      |                     | AMBER   | 0.29    | 1.01 (0.87 - 1.17) | 0.91    | 0.29        | 0.91 (0.71 - 1.17) | 0.47    |
|             |         |           |      |                     | ROOT    | 0.28    | 0.89 (0.80 - 1.00) | 0.043   | 0.28        | 0.81 (0.68 - 0.97) | 0.025   |
|             |         |           |      |                     | BCAC    | 0.29    | 0.98 (0.89 - 1.09) | 0.72    | 0.29        | 0.97 (0.83 - 1.13) | 0.67    |
|             |         |           |      |                     | AABC    | 0.3     | 0.94 (0.86 - 1.02) | 0.12    | 0.31        | 0.93 (0.83 - 1.05) | 0.24    |
|             |         |           |      |                     | Ghana   | 0.21    | 0.96 (0.83 - 1.11) | 0.58    | 0.21        | 0.93 (0.74 - 1.18) | 0.57    |
| rs2522057   | 5q31.1  | 131801947 | C    | G                   | All     | 0.77    | 0.92 (0.86 - 0.98) | 0.0084  | 0.87        | 0.93 (0.85 - 1.03) | 0.18    |
|             |         |           |      |                     | AMBER   | 0.85    | 0.91 (0.75 - 1.10) | 0.35    | 0.85        | 1.07 (0.77 - 1.46) | 0.7     |
|             |         |           |      |                     | ROOT    | 0.88    | 0.93 (0.80 - 1.08) | 0.34    | 0.88        | 0.97 (0.76 - 1.24) | 0.81    |
|             |         |           |      |                     | BCAC    | 0.86    | 0.92 (0.81 - 1.06) | 0.27    | 0.86        | 0.95 (0.78 - 1.17) | 0.65    |
|             |         |           |      |                     | AABC    | 0.85    | 0.92 (0.82 - 1.02) | 0.11    | 0.85        | 0.93 (0.79 - 1.09) | 0.34    |
|             |         |           |      |                     | Ghana   | 0.9     | 0.88 (0.71 - 1.07) | 0.19    | 0.89        | 0.78 (0.58 - 1.05) | 0.11    |
| rs1637365   | 7q11.23 | 74359358  | T    | C                   | All     | 0.56    | 1.06 (1.01 - 1.12) | 0.024   | 0.61        | 1.15 (1.06 - 1.25) | 0.00069 |
|             |         |           |      |                     | AMBER   | 0.59    | 0.95 (0.82 - 1.11) | 0.52    | 0.59        | 0.87 (0.69 - 1.11) | 0.27    |
|             |         |           |      |                     | ROOT    | 0.64    | 1.05 (0.94 - 1.17) | 0.42    | 0.64        | 1.05 (0.87 - 1.28) | 0.59    |
|             |         |           |      |                     | BCAC    | 0.61    | 1.06 (0.95 - 1.18) | 0.29    | 0.61        | 1.19 (1.01 - 1.40) | 0.04    |
|             |         |           |      |                     | AABC    | 0.56    | 1.12 (1.01 - 1.24) | 0.031   | 0.56        | 1.20 (1.04 - 1.39) | 0.012   |
|             |         |           |      |                     | Ghana   | 0.69    | 1.09 (0.95 - 1.26) | 0.23    | 0.69        | 1.45 (1.14 - 1.84) | 0.0015  |
| rs60381548  | 15q24.2 | 75728474  | CA   | C                   | All     | 0.49    | 0.93 (0.89 - 0.97) | 0.0016  | 0.51        | 0.99 (0.92 - 1.06) | 0.78    |
|             |         |           |      |                     | AMBER   | 0.48    | 0.92 (0.80 - 1.05) | 0.21    | 0.48        | 1.03 (0.83 - 1.29) | 0.77    |
|             |         |           |      |                     | ROOT    | 0.50    | 0.97 (0.88 - 1.07) | 0.57    | 0.50        | 1.14 (0.97 - 1.35) | 0.12    |
|             |         |           |      |                     | BCAC    | 0.52    | 0.92 (0.83 - 1.01) | 0.068   | 0.52        | 1.01 (0.88 - 1.17) | 0.86    |
|             |         |           |      |                     | AABC    | 0.49    | 0.93 (0.86 - 1.01) | 0.078   | 0.49        | 0.93 (0.84 - 1.04) | 0.24    |
|             |         |           |      |                     | Ghana   | 0.45    | 0.90 (0.80 - 1.02) | 0.11    | 0.45        | 0.90 (0.74 - 1.09) | 0.29    |
| rs1869959   | 15q24.1 | 75147332  | A    | C                   | All     | 0.57    | 0.95 (0.91 - 1.00) | 0.043   | 0.59        | 0.96 (0.89 - 1.03) | 0.22    |
|             |         |           |      |                     | AMBER   | 0.59    | 1.07 (0.93 - 1.24) | 0.32    | 0.59        | 0.95 (0.76 - 1.19) | 0.68    |
|             |         |           |      |                     | ROOT    | 0.6     | 0.98 (0.89 - 1.08) | 0.63    | 0.6         | 0.94 (0.79 - 1.11) | 0.44    |
|             |         |           |      |                     | BCAC    | 0.59    | 1.00 (0.91 - 1.10) | 0.99    | 0.59        | 1.02 (0.88 - 1.18) | 0.77    |
|             |         |           |      |                     | AABC    | 0.59    | 0.92 (0.85 - 0.99) | 0.03    | 0.59        | 0.93 (0.83 - 1.04) | 0.18    |
|             |         |           |      |                     | Ghana   | 0.59    | 1.08 (0.95 - 1.22) | 0.23    | 0.59        | 1.22 (1.00 - 1.49) | 0.044   |
| rs181337095 | 15q26.3 | 100907094 | A    | G                   | All     | 0.64    | 1.06 (1.01 - 1.12) | 0.017   | 0.69        | 1.07 (0.99 - 1.16) | 0.067   |
|             |         |           |      |                     | AMBER   | 0.68    | 0.96 (0.83 - 1.12) | 0.64    | 0.68        | 0.88 (0.69 - 1.14) | 0.34    |
|             |         |           |      |                     | ROOT    | 0.67    | 1.01 (0.91 - 1.12) | 0.81    | 0.67        | 0.97 (0.81 - 1.16) | 0.74    |
|             |         |           |      |                     | BCAC    | 0.69    | 1.07 (0.96 - 1.19) | 0.22    | 0.69        | 1.06 (0.90 - 1.23) | 0.5     |
|             |         |           |      |                     | AABC    | 0.7     | 1.11 (1.02 - 1.22) | 0.015   | 0.7         | 1.20 (1.06 - 1.37) | 0.003   |
|             |         |           |      |                     | Ghana   | 0.68    | 1.10 (0.96 - 1.26) | 0.17    | 0.68        | 1.04 (0.85 - 1.29) | 0.69    |

Abbreviation: TAF, Test allele frequency; SNP, single nucleotide polymorphism; OR, odds ratio; CI, confidence intervals.

**Table S3. Association results of novel loci in each BCAC datasets in Europeans**

| SNP         | Locus   | Position  | Test | Other           | Dataset   | OVERALL |                    |         | ER NEGATIVE |                    |          |
|-------------|---------|-----------|------|-----------------|-----------|---------|--------------------|---------|-------------|--------------------|----------|
|             |         |           |      |                 |           | TAF     | OR (95% CI)        | P value | TAF         | OR (95% CI)        | P value  |
| rs17024629  | 1p13.3  | 110179756 | T    | C               | Meta      | 0.16    | 0.96 (0.94 - 0.98) | 1.2E-06 | 0.16        | 0.96 (0.93 - 0.99) | 0.02     |
|             |         |           |      |                 | GWAS      | 0.16    | 0.91 (0.87 - 0.98) | 0.00014 | 0.16        | 0.91 (0.85 - 0.98) | 0.014    |
|             |         |           |      |                 | iCOGS     | 0.16    | 0.95 (0.93 - 0.98) | 0.00033 | 0.16        | 0.96 (0.91 - 1.02) | 0.18     |
|             |         |           |      |                 | Oncoarray | 0.17    | 0.98 (0.95 - 1.00) | 0.72    | 0.16        | 0.98 (0.94 - 1.03) | 0.44     |
| rs67931591  | 1q41    | 215330292 | G    | GCTGAGG-CAGGAGA | Meta      | 0.68    | 0.98 (0.96 - 0.99) | 0.00039 | 0.68        | 0.94 (0.92 - 0.96) | 4.6E-07  |
|             |         |           |      |                 | GWAS      | 0.68    | 0.95 (0.91 - 0.99) | 0.01    | 0.68        | 0.85 (0.79 - 0.91) | 3.9E-06  |
|             |         |           |      |                 | iCOGS     | 0.68    | 0.99 (0.97 - 1.01) | 0.55    | 0.68        | 0.98 (0.95 - 1.02) | 0.44     |
|             |         |           |      |                 | Oncoarray | 0.68    | 0.97 (0.95 - 0.99) | 0.00083 | 0.68        | 0.93 (0.90 - 0.96) | 0.00033  |
| rs2522057   | 5q31.1  | 131801947 | C    | G               | Meta      | 0.58    | 0.97 (0.96 - 0.98) | 9.3E-08 | 0.58        | 0.99 (0.96 - 1.01) | 0.22     |
|             |         |           |      |                 | GWAS      | 0.59    | 0.95 (0.92 - 0.98) | 0.0042  | 0.59        | 0.96 (0.91 - 1.01) | 0.15     |
|             |         |           |      |                 | iCOGS     | 0.59    | 0.97 (0.95 - 0.99) | 0.0022  | 0.59        | 1.00 (0.96 - 1.03) | 0.81     |
|             |         |           |      |                 | Oncoarray | 0.59    | 0.97 (0.95 - 0.99) | 0.00052 | 0.59        | 0.99 (0.96 - 1.02) | 0.48     |
| rs1637365   | 7q11.23 | 74359358  | T    | C               | Meta      | 0.28    | 1.04 (1.02 - 1.05) | 3.3E-06 | 0.28        | 1.07 (1.04 - 1.10) | 9.0E-07  |
|             |         |           |      |                 | GWAS      | 0.28    | 1.06 (1.00 - 1.12) | 0.033   | 0.28        | 1.10 (1.00 - 1.22) | 0.056    |
|             |         |           |      |                 | iCOGS     | 0.29    | 1.03 (1.00 - 1.05) | 0.027   | 0.28        | 1.05 (1.00 - 1.10) | 0.06     |
|             |         |           |      |                 | Oncoarray | 0.28    | 1.04 (1.02 - 1.06) | 0.00026 | 0.28        | 1.08 (1.04 - 1.12) | 1.70E-05 |
| rs60381548  | 15q24.2 | 75728474  | CA   | C               | Meta      | 0.25    | 0.96 (0.95 - 0.98) | 4.0E-07 | 0.25        | 0.95 (0.92 - 0.97) | 8.60E-05 |
|             |         |           |      |                 | GWAS      | 0.24    | 0.98 (0.94 - 1.03) | 0.41    | 0.25        | 0.94 (0.87 - 1.01) | 0.11     |
|             |         |           |      |                 | iCOGS     | 0.24    | 0.96 (0.94 - 0.98) | 0.00091 | 0.24        | 0.95 (0.91 - 1.00) | 0.034    |
|             |         |           |      |                 | Oncoarray | 0.25    | 0.96 (0.94 - 0.98) | 0.00011 | 0.25        | 0.95 (0.91 - 0.98) | 0.0037   |
| rs1869959   | 15q24.1 | 75147332  | A    | C               | Meta      | 0.7     | 1.04 (1.02 - 1.05) | 3.6E-07 | 0.7         | 1.04 (1.01 - 1.06) | 0.005    |
|             |         |           |      |                 | GWAS      | 0.71    | 1.02 (0.98 - 1.06) | 0.36    | 0.7         | 0.99 (0.93 - 1.04) | 0.61     |
|             |         |           |      |                 | iCOGS     | 0.71    | 1.02 (1.00 - 1.05) | 0.025   | 0.71        | 1.03 (0.99 - 1.07) | 0.18     |
|             |         |           |      |                 | Oncoarray | 0.7     | 1.05 (1.03 - 1.07) | 1.2E-06 | 0.7         | 1.06 (1.02 - 1.10) | 0.0013   |
| rs181337095 | 15q26.3 | 100907094 | A    | G               | Meta      | 0.87    | 1.05 (1.03 - 1.07) | 3.4E-07 | 0.87        | 1.06 (1.02 - 1.10) | 0.0016   |
|             |         |           |      |                 | GWAS      | 0.88    | 1.03 (0.98 - 1.10) | 0.25    | 0.88        | 1.03 (0.94 - 1.13) | 0.51     |
|             |         |           |      |                 | iCOGS     | 0.86    | 1.08 (1.05 - 1.12) | 1.6E-06 | 0.86        | 1.10 (1.03 - 1.18) | 0.0038   |
|             |         |           |      |                 | Oncoarray | 0.87    | 1.04 (1.01 - 1.07) | 0.011   | 0.87        | 1.05 (0.99 - 1.10) | 0.08     |

Abbreviation: TAF, Test allele frequency; SNP, single nucleotide polymorphism; OR, odds ratio; CI, confidence intervals.

**Table S4. Pleiotropy of primary hits in the GWAS Catalog**

| SNP                  | SNP in LD             | rsq       | Effect allele | Other allele                         | Disease/trait                                                                             | Beta                  | P                                                                                                 | Study                                                                                                                                       | Journal                                                         | PMID                   | Source of beta               |
|----------------------|-----------------------|-----------|---------------|--------------------------------------|-------------------------------------------------------------------------------------------|-----------------------|---------------------------------------------------------------------------------------------------|---------------------------------------------------------------------------------------------------------------------------------------------|-----------------------------------------------------------------|------------------------|------------------------------|
| rs2522057 at 5q31.1  | rs2248116             | 0.94      | C             | A                                    | Mosquito bite size, itch intensity, attractiveness to mosquitoes                          | 0.034                 | 3.5 X 10 <sup>-21</sup>                                                                           | GWAS of self-reported mosquito bite size, itch intensity and attractiveness to mosquitoes implicates immune-related predisposition loci.    | Hum Mol Genet                                                   | 28199695 <sup>1</sup>  |                              |
|                      |                       |           |               |                                      | Eosinophil % of WBCs, sum of eosinophil and basophil counts, neutrophil % of granulocytes | 0.073                 | 6.61 X 10 <sup>-95</sup>                                                                          | The Allelic Landscape of Human Blood Cell Trait Variation and Links to Common Complex Disease.                                              | Cell                                                            | 27863252 <sup>2</sup>  |                              |
|                      | rs6866614             | 0.42      | G             | A                                    | Asthma                                                                                    | 0.072                 | 4.4 X 10 <sup>-23</sup>                                                                           | Genetic Architectures of Childhood- and Adult-Onset Asthma Are Partly Distinct.                                                             | Am J Hum Genet                                                  | 30929738 <sup>3</sup>  |                              |
| rs1869959 at 15q24.1 | rs11072518            | 0.59      | T             | C                                    | Mosquito bite size, itch intensity, attractiveness to mosquitoes                          | -0.048                | 5.5 X 10 <sup>-36</sup>                                                                           | GWAS of self-reported mosquito bite size, itch intensity and attractiveness to mosquitoes implicates immune-related predisposition loci.    | Hum Mol Genet                                                   | 28199695 <sup>1</sup>  |                              |
|                      |                       |           |               |                                      | Mean arterial blood pressure x alcohol consumption interaction                            | 0.29                  | 9.12 X 10 <sup>-31</sup>                                                                          | Novel genetic associations for blood pressure identified via gene-alcohol interaction in up to 570K individuals across multiple ancestries  | PLOS One                                                        | 29912962 <sup>4</sup>  |                              |
|                      | rs2301249             | 0.53      | T             | C                                    | Systolic blood pressure x alcohol consumption (light vs heavy) interaction (2df test)     | 0.44                  | 4.9 x 10 <sup>-14</sup>                                                                           | Novel genetic associations for blood pressure identified via gene-alcohol interaction in up to 570K individuals across multiple ancestries. | PLOS One                                                        | 29912962 <sup>4</sup>  | Cross ancestry meta-analysis |
|                      | rs936226              | 0.56      | T             | C                                    | Diastolic blood pressure                                                                  | -0.549                | 3.06 X 10 <sup>-16</sup>                                                                          | The genetics of blood pressure regulation and its target organs from association studies in 342,415 individuals.                            | Nat Genet                                                       | 27618452 <sup>5</sup>  |                              |
|                      | rs2472299             | 0.4       | G             | A                                    | Coronary heart disease                                                                    |                       | 3.09 x 10 <sup>-6</sup>                                                                           | A genome-wide association study in Europeans and South Asians identifies five new loci for coronary artery disease.                         | Nat Genet                                                       | 21378988 <sup>6</sup>  |                              |
|                      | rs1350193             | 0.49      | C             | G                                    | Diastolic blood pressure x alcohol consumption (light vs heavy) interaction (2df test)    | -0.27                 | 2.69 X 10 <sup>-13</sup>                                                                          | Novel genetic associations for blood pressure identified via gene-alcohol interaction in up to 570K individuals across multiple ancestries  | PLOS One                                                        | 29912962 <sup>4</sup>  | Cross ancestry meta-analysis |
|                      | rs10628234            | 0.65      | CACA          | CA                                   | Diastolic blood pressure x smoking status (ever vs never) interaction (2df test)          | 0.32                  | 1.57 x 10 <sup>-24</sup>                                                                          | A Large-Scale Multi-ancestry Genome-wide Study Accounting for Smoking Behavior Identifies Multiple Significant Loci for Blood Pressure.     | Am J Hum Genet                                                  | 29455858 <sup>6</sup>  | Trans-ancestry analysis      |
|                      | rs6495127             | 0.76      | T             |                                      | Self reported educational attainment                                                      | 0.009                 | 5.142 x 10 <sup>-9</sup>                                                                          | Gene discovery and polygenic prediction from a genome-wide association study of educational attainment in 1.1 million individuals.          | Nat Genet                                                       | 30038396 <sup>7</sup>  |                              |
|                      | rs1543927             | 0.42      | T             | C                                    | Medication use (beta blocking agents)                                                     | 0.05                  | 2.2 x 10 <sup>-8</sup>                                                                            | Genome-wide association study of medication-use and associated disease in the UK Biobank.                                                   | Nat Commun                                                      | 31015401 <sup>8</sup>  |                              |
|                      | rs60381548 at 15q24.2 | rs8027365 | 0.83          | C                                    | A                                                                                         | Breast cancer         | 0.038                                                                                             | 1 x 10 <sup>-7</sup>                                                                                                                        | Association analysis identifies 65 new breast cancer risk loci. | Nature                 | 29059683 <sup>9</sup>        |
| rs4886707            |                       | 0.83      | T             | C                                    | Body height                                                                               | 0.06                  | 8 x 10 <sup>-8</sup>                                                                              | A genome-wide association study in 19 633 Japanese subjects identified LHX3-QSOX2 and IGF1 as adult height loci.                            | Hum Mol Genet                                                   | 20189936 <sup>10</sup> |                              |
| rs4886707            |                       | 0.83      | T             | C                                    | Body height                                                                               |                       | 1 x 10 <sup>-7</sup>                                                                              | Evaluation and application of summary statistic imputation to discover new height-associated loci.                                          | PLOS Genet                                                      | 29782485 <sup>11</sup> |                              |
| rs8024244            |                       | 0.82      | A             | G                                    | Height                                                                                    |                       | 1 x 10 <sup>-51</sup>                                                                             | Leveraging Polygenic Functional Enrichment to Improve GWAS Power                                                                            | Am J Hum Genet                                                  | 30595370 <sup>12</sup> |                              |
| rs4886699            | 0.77                  | C         | A             | Estimated glomerular filtration rate | 0.0031                                                                                    | 5 x 10 <sup>-19</sup> | A catalog of genetic loci associated with kidney function from analyses of a million individuals. | Nat Genet                                                                                                                                   | 31152163 <sup>13</sup>                                          |                        |                              |
| rs7166281            | 0.4                   | G         | T             | type II diabetes mellitus            |                                                                                           | 1 X 10 <sup>-7</sup>  | Leveraging Polygenic Functional Enrichment to Improve GWAS Power                                  | Am J Hum Genet                                                                                                                              | 30595370 <sup>14</sup>                                          |                        |                              |

**Table S5A. Association between novel SNPs and candidate genes in eQTL analysis of breast tumors in TCGA\***

| Novel SNP   | test/other alleles | geneSymbol | gene_start | gene_end  | Beta    |          |               | P value |          |               |
|-------------|--------------------|------------|------------|-----------|---------|----------|---------------|---------|----------|---------------|
|             |                    |            |            |           | African | European | Meta-analysis | African | European | Meta-analysis |
| rs17024629  | T/C                | GSTM4      | 110198703  | 110208118 | 0.28    | 0.29     | 0.29          | 0.07    | 1.49E-07 | 2.12E-08      |
|             |                    | GSTM2      | 110210644  | 110252171 | 0.48    | 0.49     | 0.49          | 0.15    | 4.65E-06 | 1.30E-06      |
|             |                    | GSTM1      | 110230436  | 110251661 | 1.33    | 1.45     | 1.43          | 0.06    | 1.38E-07 | 1.70E-08      |
| rs67931591  | G/GCTGAGGCAGGAGA   | PTPN14     | 214522039  | 214725792 | 0.17    | 0.10     | 0.11          | 0.15    | 0.059    | 0.0205        |
| rs2522057   | C/G                | IRF1       | 131817301  | 131826490 | 0.18    | 0.19     | 0.19          | 0.28    | 0.000148 | 7.39E-05      |
|             |                    | CCNI2      | 132083137  | 132089856 | 0.01    | 0.33     | 0.31          | 0.99    | 0.000179 | 2.87E-04      |
| rs1637366** | C/G                | STAG3L2    | 74112305   | 74306731  | 0.09    | 0.22     | 0.20          | 0.56    | 0.000358 | 0.000368      |
| rs1869959   | C/A                | ULK3       | 75128457   | 75135687  | -0.01   | -0.10    | -0.08         | 0.86    | 8.47E-04 | 0.001458      |
|             |                    | MPI        | 75182346   | 75191798  | 0.00    | 0.11     | 0.09          | 0.98    | 3.35E-05 | 0.000108      |
| rs60381548  | CA/C               | SIN3A      | 75661720   | 75748183  | 0.16    | 0.05     | 0.07          | 0.00    | 2.94E-02 | 5.29E-04      |
|             |                    | PTPN9      | 75759462   | 75871630  | 0.13    | 0.05     | 0.07          | 0.02    | 2.22E-02 | 2.08E-03      |
|             |                    | SNUPN      | 75890424   | 75918810  | 0.06    | 0.11     | 0.10          | 0.27    | 2.35E-05 | 1.68E-05      |
|             |                    | SNX33      | 75940247   | 75954642  | 0.09    | 0.05     | 0.06          | 0.07    | 3.24E-02 | 5.98E-03      |

\* Multivariable linear model adjusted for age, ancestry, CNV, batch effect and molecular subtype of breast cancer.

\*\* rs1637366 is in strong LD with rs1637365 ( $r^2=1$  for European population and  $r^2=0.69$  in African population)

**Table S5B. Association between novel SNPs and candidate genes in eQTL analysis of normal breast tissues in GTEx\***

| Novel SNP | Loci    | geneSymbol | gene_start  | gene_end    | p-value  |
|-----------|---------|------------|-------------|-------------|----------|
| rs2522057 | 5q31    | SLC22A5    | 131,705,444 | 131,731,306 | 9.27E-07 |
| rs1869959 | 15q24.1 | ULK3       | 75,128,457  | 75,135,687  | 7.59E-11 |

\* The Genotype-Tissue Expression (GTEx) pilot analysis: Multitissue gene regulation in humans. The GTEx Consortium. Science 2015; 348(6235):648-660



Supplementary Table S6: Functional annotation of lead SNPs and others in high LD using Haploreg

| chr       | pos (hg38) | LD                | LD    | variant     | Ref | Alt   | AF   | AM   | AS   | EU   | Promot     | Enhanc     | DNase           | Proteins    | Motifs            | NHGR/E | GRAS     | Selecte | GENCOD   | dbSN     |
|-----------|------------|-------------------|-------|-------------|-----|-------|------|------|------|------|------------|------------|-----------------|-------------|-------------------|--------|----------|---------|----------|----------|
|           |            | (r <sup>2</sup> ) | (D')  |             |     |       | R    | R    | N    | R    | er         | er         |                 | bound       | changed           | BI     | P QTL    | d eQTL  | E        | P        |
| EUROPEANS |            |                   |       |             |     |       |      |      |      |      |            |            |                 |             |                   |        |          |         |          |          |
| rs2522057 |            |                   |       |             |     |       |      |      |      |      |            |            |                 |             |                   |        |          |         |          |          |
|           |            |                   |       |             |     |       | fre  | freq | fre  | fre  | histone    | histone    |                 |             |                   | GWAS   | hits     | hits    | genes    | annot    |
| 5         | 132435113  | 0.86              | -0.94 | rs2188962   | C   | T     | 0.05 | 0.29 | 0    | 0.38 |            | 22 tissues | 6 tissues       | HNF4A,HNF4G | 6 altered motifs  | 3 hits | 324 hits | 45 hits | C5orf56  | intronic |
| 5         | 132442760  | 0.96              | -0.96 | rs17622378  | A   | G     | 0.05 | 0.28 | 0    | 0.38 |            | 9 tissues  |                 |             | 4 altered motifs  |        |          | 45 hits | C5orf56  | intronic |
| 5         | 132448701  | 0.91              | -0.97 | rs12521868  | G   | T     | 0.05 | 0.28 | 0    | 0.38 |            | 12 tissues |                 |             | 5 altered motifs  | 1 hit  | 5 hits   | 45 hits | C5orf56  | intronic |
| 5         | 132449992  | 0.92              | -0.97 | rs12515180  | C   | T     | 0.04 | 0.28 | 0    | 0.38 |            | 7 tissues  |                 |             | 8 altered motifs  |        |          | 44 hits | C5orf56  | intronic |
| 5         | 132450759  | 0.91              | -0.97 | rs146604341 | G   | GAT A | 0.04 | 0.28 | 0    | 0.38 |            | 10 tissues | SKIN,PLCNT,OVRY | FOXA1,GATA3 | 14 altered motifs |        |          | 40 hits | C5orf56  | intronic |
| 5         | 132450903  | 0.92              | -0.97 | rs11951091  | G   | A     | 0.04 | 0.28 | 0    | 0.37 |            | 10 tissues | 6 tissues       |             | GATA,Nkx2         |        |          | 45 hits | C5orf56  | intronic |
| 5         | 132451445  | 0.92              | 0.97  | rs6866614   | A   | G     | 0.9  | 0.72 | 1    | 0.63 |            | 14 tissues | PLCNT           |             | ZID               |        |          | 44 hits | C5orf56  | intronic |
| 5         | 132457594  | 0.99              | -0.99 | rs47059509  | C   | T     | 0.05 | 0.28 | 0.03 | 0.37 | BLD, THYM  | 24 tissues | 23 tissues      | ELF1,POL2   | 4 altered motifs  |        |          | 43 hits | C5orf56  | 3'-UTR   |
| 5         | 132460471  | 0.98              | -0.99 | rs72797303  | T   | C     | 0.04 | 0.28 | 0.03 | 0.37 |            | 23 tissues | 7 tissues       | CTCF        | BDP1,ZNF263       |        |          | 38 hits | C5orf56  | intronic |
| 5         | 132461117  | 1                 | 1     | rs2706396   | A   | C     | 0.88 | 0.71 | 0.9  | 0.63 |            | 16 tissues | GI,GI           | POL2        | 7 altered motifs  |        |          | 39 hits | C5orf56  | 3'-UTR   |
| 5         | 132462795  | 1                 | 1     | rs2522052   | C   | T     | 0.88 | 0.71 | 0.97 | 0.63 |            | 18 tissues |                 |             | 5 altered motifs  |        |          | 44 hits | C5orf56  | intronic |
| 5         | 132463320  | 0.89              | 1     | rs2706403   | A   | G     | 0.85 | 0.7  | 0.94 | 0.6  |            | 19 tissues | GI,GI,GI        |             | TCF12             |        |          | 34 hits | C5orf56  | intronic |
| 5         | 132464269  | 0.99              | 1     | rs2706336   | T   | C     | 0.88 | 0.71 | 0.97 | 0.63 | 20 tissues | 13 tissues | 7 tissues       | EBF1        | 6 altered motifs  |        |          | 39 hits | C5orf56  | intronic |
| 5         | 132465058  | 1                 | -1    | rs72797306  | G   | C     | 0.05 | 0.28 | 0.03 | 0.37 | 14 tissues | 20 tissues | 7 tissues       |             | 7 altered motifs  |        |          | 38 hits | C5orf56  | intronic |
| 5         | 132466255  | 1                 | 1     | rs2522057   | G   | C     | 0.88 | 0.71 | 0.97 | 0.63 | 4 tissues  | 22 tissues | 10 tissues      | GATA1       |                   | 2 hits | 44 hits  | C5orf56 | intronic |          |
| 5         | 132468655  | 0.98              | 0.99  | rs2248116   | C   | A     | 0.87 | 0.71 | 0.97 | 0.63 |            | 13 tissues |                 | Hsf         |                   | 1 hit  | 45 hits  | C5orf56 | intronic |          |
| 5         | 132475490  | 0.94              | -0.97 | rs11741255  | G   | A     | 0.05 | 0.28 | 0.02 | 0.37 |            | 24 tissues | 7 tissues       |             | 10 altered motifs |        |          | 44 hits | C5orf56  | intronic |

Supplementary Table S6: Functional annotation of lead SNPs and others in high LD using Haploreg (Contd)

| chr                | pos (hg38) | LD                | LD   | variant     | Ref    | Alt    | AFR  | AMR  | ASN  | EUR  | Promoter      | Enhancer        | DNase      | Proteins          | Motifs            | GRASP QTL | Selected eQTL | GENCODE                    | dbSNP      |
|--------------------|------------|-------------------|------|-------------|--------|--------|------|------|------|------|---------------|-----------------|------------|-------------------|-------------------|-----------|---------------|----------------------------|------------|
|                    |            | (r <sup>2</sup> ) | (D') |             |        |        | freq | freq | freq | freq | histone marks | histone marks   |            | bound             | changed           | hits      | hits          | genes                      | func annot |
| <b>EUROPEANS</b>   |            |                   |      |             |        |        |      |      |      |      |               |                 |            |                   |                   |           |               |                            |            |
| 1                  | 109626568  | 0.94              | 0.99 | rs865774    | C      | T      | 0.12 | 0.13 | 0.03 | 0.16 |               | 5 tissues       |            |                   | VDR               | 8 hits    | 27 hits       | AMPD2                      | intronic   |
| 1                  | 109628903  | 0.94              | 0.99 | rs560674    | C      | G      | 0.12 | 0.13 | 0.03 | 0.16 |               | 6 tissues       |            |                   | VDR               |           | 20 hits       | RP5-1160K1.6               | intronic   |
| 1                  | 109631153  | 0.95              | 1    | rs568686    | G      | T      | 0.11 | 0.13 | 0.03 | 0.16 |               | 8 tissues       |            |                   |                   | 4 hits    | 25 hits       | AMPD2                      | 3'-UTR     |
| 1                  | 109631583  | 0.95              | 1    | rs538388    | C      | T      | 0.11 | 0.13 | 0.03 | 0.16 |               | 7 tissues       | THYM       |                   | HNF4,VDR          | 1 hit     | 20 hits       | AMPD2                      | 3'-UTR     |
| 1                  | 109636928  | 1                 | 1    | rs17024628  | G      | A      | 0.05 | 0.12 | 0    | 0.16 | CRVX,<br>LIV  | 13 tissues      | CRVX       | CTCF,<br>NFYB     |                   |           | 18 hits       | 4.9kb 3' of<br>AMPD2       |            |
| 1                  | 109637134  | 1                 | 1    | rs17024629  | C      | T      | 0.13 | 0.13 | 0    | 0.16 | LIV           | 7 tissues       | SKIN       |                   |                   |           | 23 hits       | 5.1kb 3' of<br>AMPD2       |            |
| 1                  | 109637740  | 1                 | 1    | rs58434753  | AT     | A      | 0.13 | 0.13 | 0    | 0.16 |               |                 |            |                   | 10 altered motifs |           | 18 hits       | 5.7kb 3' of<br>AMPD2       |            |
|                    |            | 1                 | 1    | rs148898127 | 7-mer  | A      | 0.13 | 0.13 | 0    | 0.16 |               |                 |            |                   | 4 altered motifs  |           | 12 hits       | 5.8kb 3' of<br>AMPD2       |            |
| 1                  | 109640399  | 1                 | 1    | rs3850616   | G      | T      | 0.28 | 0.14 | 0    | 0.16 | BLD,<br>SKIN  | 13 tissues      | 48 tissues | 11 bound proteins | CTCF              | 4 hits    | 19 hits       | 8.3kb 3' of<br>AMPD2       |            |
| 1                  | 109650432  | 0.94              | 0.97 | rs604337    | G      | A      | 0.17 | 0.13 | 0.03 | 0.16 |               | 8 tissues       |            |                   | 6 altered motifs  |           | 19 hits       | 5.6kb 5' of<br>GSTM4       |            |
| 1                  | 109653057  | 0.92              | -    | rs669426    | G      | A      | 0.85 | 0.88 | 0.97 | 0.84 |               | GI, CRVX        |            |                   | HP1-site-factor   |           | 20 hits       | 3kb 5' of<br>GSTM4         |            |
| 1                  | 109653885  | 0.9               | 0.96 | rs2781815   | T      | C      | 0.83 | 0.88 | 0.97 | 0.84 |               | GI, CRVX        |            |                   |                   |           | 21 hits       | 2.2kb 5' of<br>GSTM4       |            |
| 1                  | 109653977  | 0.89              | 0.96 | rs2781814   | C      | T      | 0.83 | 0.88 | 0.97 | 0.84 |               | GI, CRVX        |            |                   | 4 altered motifs  |           | 18 hits       | 2.1kb 5' of<br>GSTM4       |            |
| 1                  | 109654074  | 0.86              | 0.96 | rs201520834 | T      | TC-GAA | 0.78 | 0.87 | 0.96 | 0.84 |               | GI, CRVX        |            |                   | 8 altered motifs  |           | 17 hits       | 2kb 5' of<br>GSTM4         |            |
| <b>rs1869959</b>   |            |                   |      |             |        |        |      |      |      |      |               |                 |            |                   |                   |           |               |                            |            |
| 15                 | 74849699   | 0.8               | 0.93 | rs4886613   | G      | A      | 0.3  | 0.71 | 0.7  | 0.67 |               | SKIN            | MUS,LIV    |                   | Cphx,HNF4         | 2 hits    | 38 hits       | SCAMP2                     | intronic   |
| 15                 | 74852757   | 0.86              | 0.99 | rs936230    | T      | C      | 0.54 | 0.73 | 0.71 | 0.68 |               | MUS, GI         |            |                   | Irf,Smad4         |           | 53 hits       | SCAMP2                     | intronic   |
| 15                 | 74854991   | 1                 | 1    | rs1869959   | A      | C      | 0.52 | 0.71 | 0.7  | 0.65 |               |                 |            |                   | 9 altered motifs  |           | 51 hits       | SCAMP2                     | intronic   |
| 15                 | 74856432   | 0.85              | 0.98 | rs7180432   | A      | G      | 0.32 | 0.72 | 0.7  | 0.68 |               | MUS, GI,<br>BLD |            |                   | PLZF              |           | 41 hits       | SCAMP2                     | intronic   |
| <b>rs60381548</b>  |            |                   |      |             |        |        |      |      |      |      |               |                 |            |                   |                   |           |               |                            |            |
| 15                 | 75436133   | 1                 | 1    | rs60381548  | C      | CA     |      |      |      |      |               |                 |            |                   | 13 altered motifs |           |               | SIN3A                      | intronic   |
| <b>rs67931591</b>  |            |                   |      |             |        |        |      |      |      |      |               |                 |            |                   |                   |           |               |                            |            |
| 1                  | 215156949  | 1                 | 1    | rs67931591  | 14-mer | G      |      |      |      |      |               |                 |            |                   | 9 altered motifs  |           |               | KCNK2                      | intronic   |
| <b>rs1637365</b>   |            |                   |      |             |        |        |      |      |      |      |               |                 |            |                   |                   |           |               |                            |            |
| 7                  | 74944369   | 1                 | 1    | rs1637365   | C      | T      | 0.58 | 0.17 | 0.08 | 0.22 |               |                 |            |                   |                   |           | 35 hits       | 20kb 5' of<br>GATSL1       |            |
| <b>rs181337095</b> |            |                   |      |             |        |        |      |      |      |      |               |                 |            |                   |                   |           |               |                            |            |
| 15                 | 100366889  | 1                 | 1    | rs181337095 | G      | A      | 0.21 | 0.28 | 0.28 | 0.3  |               |                 |            |                   | 5 altered motifs  |           |               | 6kb 5' of<br>RP11-168G16.2 |            |

Supplementary Table S6: Functional annotation of lead SNPs and others in high LD using Haploreg (Contd)

| chr                | pos (hg38) | LD                | LD   | variant     | Ref    | Alt | AFR  | AMR  | ASN  | EUR  | Promoter      | Enhancer      | DNase      | Proteins | Motifs            | GRASP QTL | Selected eQTL | GENCODE                 | dbSNP    |
|--------------------|------------|-------------------|------|-------------|--------|-----|------|------|------|------|---------------|---------------|------------|----------|-------------------|-----------|---------------|-------------------------|----------|
|                    |            | (r <sup>2</sup> ) | (D') |             |        |     | freq | freq | freq | freq | histone marks | histone marks |            | bound    | changed           | hits      | hits          | genes                   | func     |
|                    |            | (r <sup>2</sup> ) | (D') |             |        |     | freq | freq | freq | freq | histone marks | histone marks |            | bound    | changed           | hits      | hits          | genes                   | annot    |
| <b>AFRICANS</b>    |            |                   |      |             |        |     |      |      |      |      |               |               |            |          |                   |           |               |                         |          |
| <b>rs2522057</b>   |            |                   |      |             |        |     |      |      |      |      |               |               |            |          |                   |           |               |                         |          |
| 5                  | 132461117  | 0.98              | 1    | rs2706396   | A      | C   | 0.88 | 0.71 | 0.97 | 0.63 |               | 16 tissues    | GI,GI      | POL2     | 7 altered motifs  |           | 39 hits       | C5orf56                 | 3'-UTR   |
| 5                  | 132462795  | 0.98              | 1    | rs2522052   | C      | T   | 0.88 | 0.71 | 0.97 | 0.63 |               | 18 tissues    |            |          | 5 altered motifs  |           | 44 hits       | C5orf56                 | intronic |
| 5                  | 132464269  | 0.98              | 1    | rs2706336   | T      | C   | 0.88 | 0.71 | 0.97 | 0.63 | 20 tissues    | 13 tissues    | 7 tissues  | EBF1     | 6 altered motifs  |           | 39 hits       | C5orf56                 | intronic |
| 5                  | 132466255  | 1                 | 1    | rs2522057   | G      | C   | 0.88 | 0.71 | 0.97 | 0.63 | 4 tissues     | 22 tissues    | 10 tissues | GATA1    |                   | 2 hits    | 44 hits       | C5orf56                 | intronic |
| 5                  | 132468655  | 0.91              | 1    | rs2248116   | C      | A   | 0.87 | 0.71 | 0.97 | 0.63 |               | 13 tissues    |            |          | Hsf               | 1 hit     | 45 hits       | C5orf56                 | intronic |
| <b>rs17024629</b>  |            |                   |      |             |        |     |      |      |      |      |               |               |            |          |                   |           |               |                         |          |
| 1                  | 109637134  | 1                 | 1    | rs17024629  | C      | T   | 0.13 | 0.13 | 0    | 0.16 |               | 9 tissues     | SKIN       |          |                   |           | 23 hits       | 5.1kb 3' of AMPD2       |          |
| 1                  | 109637740  | 1                 | 1    | rs58434753  | AT     | A   | 0.13 | 0.13 | 0    | 0.16 |               |               |            |          | 10 altered motifs |           | 18 hits       | 5.7kb 3' of AMPD2       |          |
|                    |            | 0.93              | 0.96 | rs148898127 | 7-mer  | A   | 0.13 | 0.13 | 0    | 0.16 |               |               |            |          | 4 altered motifs  |           | 12 hits       | 5.8kb 3' of AMPD2       |          |
| <b>rs1869959</b>   |            |                   |      |             |        |     |      |      |      |      |               |               |            |          |                   |           |               |                         |          |
| 15                 | 74852757   | 0.8               | 0.92 | rs936230    | T      | C   | 0.54 | 0.73 | 0.71 | 0.68 |               | SKIN          | MUS,LIV    |          | Irf,Smad4         | 2 hits    | 53 hits       | SCAMP2                  | intronic |
| 15                 | 74854991   | 1                 | 1    | rs1869959   | A      | C   | 0.52 | 0.71 | 0.7  | 0.65 |               | MUS, GI       |            |          | 9 altered motifs  |           | 51 hits       | SCAMP2                  | intronic |
| <b>rs60381548</b>  |            |                   |      |             |        |     |      |      |      |      |               |               |            |          |                   |           |               |                         |          |
| 15                 | 75436133   | 1                 | 1    | rs60381548  | C      | CA  |      |      |      |      |               |               |            |          | 13 altered motifs |           |               | SIN3A                   | intronic |
| <b>rs67931591</b>  |            |                   |      |             |        |     |      |      |      |      |               |               |            |          |                   |           |               |                         |          |
| 1                  | 215156949  | 1                 | 1    | rs67931591  | 14-mer | G   |      |      |      |      |               |               |            |          | 9 altered motifs  |           |               | KCNK2                   | intronic |
| <b>rs181337095</b> |            |                   |      |             |        |     |      |      |      |      |               |               |            |          |                   |           |               |                         |          |
| 15                 | 100366889  | 1                 | 1    | rs181337095 | G      | A   | 0.21 | 0.28 | 0.28 | 0.3  |               |               |            |          | 5 altered motifs  |           |               | 6kb 5' of RP11-168G16.2 |          |



|               |                                                                                                                                                                                                                                                                                                                                                                                                                                                                                                                                                                                                                                                                                                                                                                                                                                                                                                                                                |                                                                                                                 |                                                                                                                                                                                                                                                                                                                                                                                                                                                                                                                             |                                                                                                                                                                                                                                                                                                                                                                                                                                                                                                                    |                                                                                                                                                                                                                                    |                                                                                                                                                      |                                                                                                                                                                                   |                                                                                                                                                                                                                                                                                                                                                                                       |                                                                                                         |
|---------------|------------------------------------------------------------------------------------------------------------------------------------------------------------------------------------------------------------------------------------------------------------------------------------------------------------------------------------------------------------------------------------------------------------------------------------------------------------------------------------------------------------------------------------------------------------------------------------------------------------------------------------------------------------------------------------------------------------------------------------------------------------------------------------------------------------------------------------------------------------------------------------------------------------------------------------------------|-----------------------------------------------------------------------------------------------------------------|-----------------------------------------------------------------------------------------------------------------------------------------------------------------------------------------------------------------------------------------------------------------------------------------------------------------------------------------------------------------------------------------------------------------------------------------------------------------------------------------------------------------------------|--------------------------------------------------------------------------------------------------------------------------------------------------------------------------------------------------------------------------------------------------------------------------------------------------------------------------------------------------------------------------------------------------------------------------------------------------------------------------------------------------------------------|------------------------------------------------------------------------------------------------------------------------------------------------------------------------------------------------------------------------------------|------------------------------------------------------------------------------------------------------------------------------------------------------|-----------------------------------------------------------------------------------------------------------------------------------------------------------------------------------|---------------------------------------------------------------------------------------------------------------------------------------------------------------------------------------------------------------------------------------------------------------------------------------------------------------------------------------------------------------------------------------|---------------------------------------------------------------------------------------------------------|
|               | <p>BLD.CD4.CD25M.IL17M.PL.TPC;<br/>BLD.CD4.CD25M.CD45RO.MPC;<br/>BLD.CD4.MPC; BLD.CD8.MPC;<br/>BLD.CD4.NPC; BLD.CD19.CPC;<br/>BLD.MOB.CD34.PC.M;<br/>BLD.MOB.CD34.PC.F; BLD.CD34.CC;<br/>BLD.CD19.PPC; BLD.CD56.PC;<br/>BLD.CD15.PC; THYM.FET)</p> <p><b>2_PromU</b> (BLD.CD14.PC)</p> <p><b>9_TxReg</b> (GI.RECT.MUC.29;<br/>GI.DUO.MUC; SPLN)</p> <p><b>14_EnhA2</b><br/>STRM.CHON.MRW.DR.MSC; MUS.SAT;<br/>SKIN.PEN.FRSK.KER.02;<br/>SKIN.PEN.FRSK.KER.03; <b>BRST.HMEC.35</b>;<br/><b>BRST.MYO</b>; BRN.HIPP.MID;<br/>BRN.DL.PRFRTNL.CRTX; MUS.SKLT.F;<br/>MUS.SKLT.M; MUS.TRNK.FET;<br/>MUS.LEG.FET; GI.CLN.SM.MUS;<br/>GI.RECT.SM.MUS; GI.STMC.MUS;<br/>GI.S.INT.FET; GI.L.INT.FET; GI.CLN.MUC;<br/>GI.STMC.MUC; GI.DUO.MUC; KID.FET;<br/>LNG.FET; ADRL.GLND.FET; PLCNT.FET)</p> <p><b>16_EnhW1</b><br/>BRN.SUB.NIG; BRN.ANT.CAUD;<br/>BRN.CING.GYR; BRN.INF.TMP;<br/>BRN.ANG.GYR; BRN.FET.M; MUS.PSOAS;<br/>GI.STMC.FET; PLCNT.AMN)</p> | (CRVX.HELA<br>S3.CNCR)                                                                                          | <p>BRN.CING.GYR;<br/>BRN.DL.PRFRTNL.CRTX;<br/>FAT.ADIP.NUC; MUS.PSOAS;<br/>MUS.SKLT.F; MUS.TRNK.FET;<br/>MUS.LEG.FET; HRT.FET;<br/>HRT.ATR.R; HRT.VENT.L;<br/>HRT.VNT.R; GI.DUO.SM.MUS;<br/>GI.CLN.SM.MUS;<br/>GI.RECT.SM.MUS; GI.STMC.MUS;<br/>GI.STMC.FET; GI.S.INT.FET;<br/>GI.L.INT.FET; GI.S.INT; GI.CLN.SIG;<br/>GI.CLN.MUC; GI.RECT.MUC.29;<br/>GI.RECT.MUC.31; GI.STMC.MUC;<br/>GI.DUO.MUC; GI.ESO;<br/>GI.STMC.GAST; PLCNT.AMN;<br/>LNG.FET; OVRY; ADRL.GLND.FET;<br/>PLCNT.FET; LIV.ADLT; PANC; LNG;<br/>SPLN</p> | <p>BLD.CD19.PPC<br/>;<br/>BLD.CD56.PC;<br/>BLD.CD15.PC;<br/>STRM.MRW.<br/>MSC;<br/>MUS.SAT;<br/>SKIN.PEN.FRS<br/>K.FIB.02;<br/>SKIN.PEN.FRS<br/>K.KER.02;<br/>THYM;<br/>THYM.FET;<br/>BRN.HIPP.MID<br/>;<br/>BRN.ANT.CAU<br/>D;<br/>FAT.ADIP.NUC<br/>; MUS.SKLT.F;<br/>GI.DUO.SM.M<br/>US;<br/>GI.CLN.SM.M<br/>US;<br/>GI.RECT.SM.M<br/>US;<br/>GI.STMC.MUS;<br/>GI.CLN.SIG;<br/>GI.CLN.MUC;<br/>GI.RECT.MUC.<br/>29;<br/>GI.RECT.MUC.<br/>31;<br/>GI.STMC.MUC<br/>;<br/>GI.DUO.MUC;<br/>GI.ESO;<br/>LIV.ADLT.</p> | <p>GI.RECT.MUC.29;<br/>GI.RECT.MUC.31;<br/>GI.STMC.MUC;<br/>GI.DUO.MUC; GI.ESO;<br/>LIV.ADLT.</p>                                                                                                                                  |                                                                                                                                                      | <p><b>H3K27ac</b><br/>BLD.DND4<br/>1.CNCR;<br/>BLD.GM1<br/>2878;<br/>MUS.HSM<br/>MT;<br/>BLD.K562.<br/>CNCR;<br/>BLD.CD14.<br/>MONO;<br/>SKIN.NHE<br/>K;<br/>BONE.OST<br/>EO.</p> | <p>02.CNCR<br/>;<br/>BLD.DND<br/>41.CNCR<br/>;<br/>BLD.GM<br/>12878;<br/>CRVX.HE<br/>LAS3.CN<br/>CR;<br/>LIV.HEP<br/>G2.CNCR<br/>;<br/><b>BRST.H<br/>MEC</b>;<br/>MUS.HS<br/>MM;<br/>MUS.HS<br/>MMT;<br/>VAS.HUV<br/>EC;<br/>BLD.K56<br/>2.CNCR;<br/>BLD.CD1<br/>4.MONO<br/>K;<br/>BRN.NH<br/>A;<br/>SKIN.NH<br/>DFAD;<br/>SKIN.NH<br/>EK;<br/>LNG.NHL<br/>F;<br/>BONE.O<br/>STEO</p> |                                                                                                         |
| rs2188<br>962 | <p><b>13_EnhA1</b> (LNG.IMR90)</p> <p><b>17_EnhW2</b> (IPSC.DF.19.11;<br/>ESDR.H1.NEUR.PROG;<br/>ESDR.H9.NEUR.PROG; ESDR.H9.NEUR;<br/>FAT.MSC.DR.ADIP; MUS.SAT;<br/><b>BRST.HMEC.35</b>; MUS.TRNK.FET;<br/>HRT.FET; VAS.AOR; PLCNT.AMN;<br/>PANC.ISLT)</p>                                                                                                                                                                                                                                                                                                                                                                                                                                                                                                                                                                                                                                                                                     | <b>17_EnhW2</b><br>(LNG.A549.<br>ETOH002.C<br>NCR;<br>CRVX.HELA<br>S3.CNCR;<br><b>BRST.HMEC</b><br>;<br>MUS.HSM | <p>LNG.IMR90; ESC.I3; ESC.HUES6;<br/>ESC.HUES48; ESC.HUES64;<br/>ESC.4STAR; IPSC.20B; PSC.DF.6.9;<br/>IPSC.DF.19.11;<br/>ESDR.H1.NEUR.PROG;<br/>ESDR.H9.NEUR.PROG;<br/>ESDR.H9.NEUR;<br/>ESDR.CD56.MESO;<br/>ESDR.CD56.ECTO;<br/>ESDR.CD184.ENDO;</p>                                                                                                                                                                                                                                                                       | <p>BLD.CD4.CD25<br/>I.CD127.TME<br/>MPC;<br/>BLD.CD4.<br/>BLD.MOB.CD3<br/>4.PC.M;<br/>BLD.MOB.CD3<br/>4.PC.F;<br/>MUS.SKLT.F;<br/>GI.DUO.SM.M</p>                                                                                                                                                                                                                                                                                                                                                                  | <p>LNG.IMR90; ESDR.H1.MSC;<br/>BLD.PER.MONUC.PC;<br/>BLD.CD3.PPC;<br/>BLD.CD4.CD25I.CD127.TME<br/>MPC;<br/>BLD.CD4.CD25.CD127M.TRE<br/>GPC; BLD.CD4.CD25M.TPC;<br/>BLD.CD4.CD25M.CD45RA.N<br/>PC;<br/>BLD.CD4.CD25M.IL17M.PL.T</p> | <p>LNG.IMR90;<br/>IPSC.15b;<br/>ESDR.H1.NEUR.<br/>PROG;<br/>ESDR.H1.BMP4.<br/>TROP;<br/>BLD.PER.MONU<br/>C.PC;<br/>BLD.CD4.NPC;<br/>BRN.SUB.NIG;</p> | <p><b>H3K4me1</b><br/>BLD.DND4<br/>1.CNCR;<br/>BLD.GM1<br/>2878;<br/>LIV.HEPG2<br/>.CNCR;<br/><b>BRST.HME<br/>C</b>;</p>                                                          | <p><b>H3K4me<br/>3</b><br/>BLD.DND<br/>41.CNCR<br/>;<br/>LIV.HEP<br/>G2.CNCR<br/>.</p>                                                                                                                                                                                                                                                                                                | <p>ROADMAP<br/>GI.S.INT.FE<br/>T;<br/>GI.L.INT.FE<br/>T; GI.S.INT;<br/>GI.STMC.G<br/>AST<br/>ENCODE</p> |

|  |                                                                                                                                                                                                                                                                                                                                                                                                                                                                                                                                                                                                                                                                                                                                                                                                                                                                                                                                                                                                                                                                                                                                                                                                                                                                  |                                                                                                                                                                                                                                                                                                                   |                                                                                                                                                                                                                                                                                                                                                                                                                                                                                                                                                                                                                                                                                                                                                                                                                                                                                                                                                                                                                                                                                              |                                                                                                                     |                                                                                                                                                                                                                                                                                                                                                                                                                                                                              |                                                                                                          |                                                                                                                                                                                                                                      |                                                                           |                                        |
|--|------------------------------------------------------------------------------------------------------------------------------------------------------------------------------------------------------------------------------------------------------------------------------------------------------------------------------------------------------------------------------------------------------------------------------------------------------------------------------------------------------------------------------------------------------------------------------------------------------------------------------------------------------------------------------------------------------------------------------------------------------------------------------------------------------------------------------------------------------------------------------------------------------------------------------------------------------------------------------------------------------------------------------------------------------------------------------------------------------------------------------------------------------------------------------------------------------------------------------------------------------------------|-------------------------------------------------------------------------------------------------------------------------------------------------------------------------------------------------------------------------------------------------------------------------------------------------------------------|----------------------------------------------------------------------------------------------------------------------------------------------------------------------------------------------------------------------------------------------------------------------------------------------------------------------------------------------------------------------------------------------------------------------------------------------------------------------------------------------------------------------------------------------------------------------------------------------------------------------------------------------------------------------------------------------------------------------------------------------------------------------------------------------------------------------------------------------------------------------------------------------------------------------------------------------------------------------------------------------------------------------------------------------------------------------------------------------|---------------------------------------------------------------------------------------------------------------------|------------------------------------------------------------------------------------------------------------------------------------------------------------------------------------------------------------------------------------------------------------------------------------------------------------------------------------------------------------------------------------------------------------------------------------------------------------------------------|----------------------------------------------------------------------------------------------------------|--------------------------------------------------------------------------------------------------------------------------------------------------------------------------------------------------------------------------------------|---------------------------------------------------------------------------|----------------------------------------|
|  | <p><b>16_EnhW1</b> (SKIN.PEN.FRSK.KER.03)</p> <p><b>15_EnhAF</b> (ESDR.H1.BMP4.TROP; SKIN.PEN.FRSK.KER.02; <b>BRST.MYO</b>; MUS.PSOAS; GI.ESO; GI.STMC.GAST; KID.FET; LNG.FET; OVRY; ADRL.GLND.FET;</p> <p><b>14_EnhA2</b> (ESDR.H1.MSC)</p> <p><b>12_TxEnhW</b> (BLD.PER.MONUC.PC; BLD.CD3.CPC; BLD.CD4.CD25.CD127M.TREGPC; BLD.CD34.PC; BLD.CD34.CC; SKIN.PEN.FRSK.FIB.01; SKIN.PEN.FRSK.FIB.02; SKIN.PEN.FRSK.MEL.01; THYM; BRN.ANT.CAUD; BRN.CING.GYR; BRN.INF.TMP; BRN.ANG.GYR; BRN.DL.PRFRTL.CRTX; MUS.LEG.FET)</p> <p><b>10_TxEnhW</b> (BLD.CD3.PPC; BLD.CD4.CD251.CD127.TMEMPC; BLD.CD4.CD25M.TPC; BLD.CD4.CD25M.CD45RA.NPC; BLD.CD4.CD25M.IL17M.PL.TPC; BLD.CD4.CD25M.IL17P.PL.TPC; BLD.CD4.CD25M.CD45RO.MPC; BLD.CD4.MPC; BLD.CD8.MPC; BLD.CD4.NPC; BLD.CD8.NPC; BLD.CD14.PC; BLD.CD19.CPC; BLD.MOB.CD34.PC.M; BLD.MOB.CD34.PC.F; BLD.CD19.PPC; BLD.CD56.PC; BLD.CD15.PC; THYM.FET; BRN.HIPP.MID; BRN.SUB.NIG; MUS.SKLT.F; HRT.ATR.R; HRT.VENT.L; HRT.VNT.R; GI.CLN.SM.MUS; GI.STMC.FET; GI.S.INT; GI.STMC.MUC; PLCNT.FET; PANC)</p> <p><b>9_TxReg</b> (FAT.ADIP.NUC; MUS.SKLT.M; GI.DUO.SM.MUS; GI.RECT.SM.MUS; GI.STMC.MUS; GI.S.INT.FET; GI.L.INT.FET; LIV.ADLT; GI.CLN.SIG; GI.CLN.MUC; GI.RECT.MUC.29; GI.RECT.MUC.31; GI.DUO.MUC; LNG; SPLN)</p> | <p>M; BONE.OSTEO)</p> <p><b>16_EnhW2</b> (MUS.HSM MT)</p> <p><b>9_TxReg</b> (BLD.DND4 1.CNCR)</p> <p><b>12_TxEnhW</b> (BLD.GM12 878)</p> <p><b>11_TxEnh3</b> (BLD.K562. CNCR)</p> <p><b>13_EnhA1</b> (LIV.HEPG2. CNCR)</p> <p><b>10_TxEnh5</b> (BLD.CD14. MONO; LNG.NHLF)</p> <p><b>15_EnhAF</b> (SKIN.NHEK )</p> | <p>ESDR.H1.BMP4.TROP; ESDR.H1.MSC; BLD.PER.MONUC.PC; BLD.CD3.PPC; BLD.CD4.CD251.CD127.TMEMPC; BLD.CD4.CD25.CD127M.TREGPC; BLD.CD4.CD25M.TPC; BLD.CD4.CD25M.CD45RA.NPC; BLD.CD4.CD25M.IL17M.PL.TPC; BLD.CD4.CD25M.IL17P.PL.TPC; BLD.CD4.CD25M.CD45RO.MPC; BLD.CD4.MPC; BLD.CD8.MPC; BLD.CD4.NPC; BLD.CD8.NPC; BLD.CD14.PC; BLD.CD19.CPC; SKIN.PEN.FRSK.FIB.01; BLD.MOB.CD34.PC.M; BLD.MOB.CD34.PC.F; BLD.CD34.CC; BLD.CD19.PPC; BLD.CD56.PC; BLD.CD15.PC; STRM.CHON.MRW.DR.MSC; SKIN.PEN.FRSK.FIB.01; SKIN.PEN.FRSK.FIB.02; SKIN.PEN.FRSK.KER.02; SKIN.PEN.FRSK.KER.03; <b>BRST.HMEC.35; BRST.MYO</b>; THYM; THYM.FET; BRN.HIPP.MID; BRN.SUB.NIG; BRN.ANT.CAUD; BRN.CING.GYR; BRN.INF.TMP; BRN.ANG.GYR; BRN.DL.PRFRTL.CRTX; FAT.ADIP.NUC; MUS.PSOAS; MUS.SKLT.F; MUS.SKLT.M; MUS.TRNK.FET; HRT.FET; HRT.ATR.R; HRT.VENT.L; HRT.VNT.R; VAS.AOR; GI.DUO.SM.MUS; GI.CLN.SM.MUS; GI.RECT.SM.MUS; GI.STMC.MUS; GI.S.INT.FET; GI.L.INT.FET; GI.S.INT; GI.CLN.SIG; GI.CLN.MUC; GI.RECT.MUC.29; GI.RECT.MUC.31; GI.STMC.MUC; GI.DUO.MUC; GI.ESO; GI.STMC.GAST; PLCNT.AMN; KID.FET; LNG.FET; OVRY;</p> | <p>US; GI.CLN.SM.M US; GI.RECT.SM.M US; GI.STMC.MUS; GI.CLN.SIG; GI.CLN.MUC; GI.RECT.MUC. 29; GI.DUO.MUC; SPLN.</p> | <p>PC; BLD.CD4.CD25M.IL17P.PL.T PC; BLD.CD4.CD25M.CD45RO.M PC; BLD.CD4.MPC; BLD.CD4.NPC; BLD.CD14.PC; BLD.CD56.PC; THYM; THYM.FET; BRN.ANT.CAUD; BRN.CING.GYR; BRN.INF.TMP; FAT.ADIP.NUC; MUS.SKLT.F; HRT.ATR.R; HRT.VENT.L; HRT.VNT.R; GI.DUO.SM.MUS; GI.CLN.SM.MUS; GI.RECT.SM.MUS; GI.STMC.MUS; GI.STMC.FET; GI.S.INT.FET; GI.L.INT.FET; GI.S.INT; GI.CLN.SIG; GI.CLN.MUC; GI.RECT.MUC.29; GI.RECT.MUC.31; GI.ESO; GI.STMC.GAST; PLCNT.FET; LIV.ADLT; PANC; LNG; SPLN</p> | <p>BRN.CING.GYR; FAT.ADIP.NUC; MUS.SKLT.M; GI.CLN.MUC; GI.RECT.MUC.2 9; GI.RECT.MUC.3 1; GI.DUO.MUC.</p> | <p>MUS.HSM M; MUS.HSM MT; BLD.K562. CNCR; BLD.CD14. MONO; BRN.NHA; SKIN.NHD FAD; SKIN.NHE K; LNG.NHLF .</p> <p><b>H3K27ac</b> BLD.DND4 1.CNCR; BLD.GM1 2878; LIV.HEPG2 .CNCR; MUS.HSM MT; BLD.CD14. MONO; LNG.NHLF ; BONE.OST EO</p> | <p><b>H3K9ac</b> BLD.DND 41.CNCR ; LIV.HEP G2.CNCR ; BLD.CD1 4.MONO .</p> | <p>LIV.HEPG2. CNCR; BLD.K562.C NCR</p> |
|--|------------------------------------------------------------------------------------------------------------------------------------------------------------------------------------------------------------------------------------------------------------------------------------------------------------------------------------------------------------------------------------------------------------------------------------------------------------------------------------------------------------------------------------------------------------------------------------------------------------------------------------------------------------------------------------------------------------------------------------------------------------------------------------------------------------------------------------------------------------------------------------------------------------------------------------------------------------------------------------------------------------------------------------------------------------------------------------------------------------------------------------------------------------------------------------------------------------------------------------------------------------------|-------------------------------------------------------------------------------------------------------------------------------------------------------------------------------------------------------------------------------------------------------------------------------------------------------------------|----------------------------------------------------------------------------------------------------------------------------------------------------------------------------------------------------------------------------------------------------------------------------------------------------------------------------------------------------------------------------------------------------------------------------------------------------------------------------------------------------------------------------------------------------------------------------------------------------------------------------------------------------------------------------------------------------------------------------------------------------------------------------------------------------------------------------------------------------------------------------------------------------------------------------------------------------------------------------------------------------------------------------------------------------------------------------------------------|---------------------------------------------------------------------------------------------------------------------|------------------------------------------------------------------------------------------------------------------------------------------------------------------------------------------------------------------------------------------------------------------------------------------------------------------------------------------------------------------------------------------------------------------------------------------------------------------------------|----------------------------------------------------------------------------------------------------------|--------------------------------------------------------------------------------------------------------------------------------------------------------------------------------------------------------------------------------------|---------------------------------------------------------------------------|----------------------------------------|

|                |                                                                                                                                                                                                                                                                                                                                                                                                                                                                                                                                                                                                                                                                                                                                                                                          |                                                                                                       |                                                                                                                                                                                                                                                                                                                                                                                                                                                                                                                                                                                                                                                                                                                                                                                                                                                                                                                                                                                                                                                                                                                                                      |                                                                                           |                                                                                                                                                                                                                                                                                                                                                                                                                                                                                                                                                                                                  |                                                                                                                                                                                          |                                                                                                                                                                                                                                                                   |                                                     |  |
|----------------|------------------------------------------------------------------------------------------------------------------------------------------------------------------------------------------------------------------------------------------------------------------------------------------------------------------------------------------------------------------------------------------------------------------------------------------------------------------------------------------------------------------------------------------------------------------------------------------------------------------------------------------------------------------------------------------------------------------------------------------------------------------------------------------|-------------------------------------------------------------------------------------------------------|------------------------------------------------------------------------------------------------------------------------------------------------------------------------------------------------------------------------------------------------------------------------------------------------------------------------------------------------------------------------------------------------------------------------------------------------------------------------------------------------------------------------------------------------------------------------------------------------------------------------------------------------------------------------------------------------------------------------------------------------------------------------------------------------------------------------------------------------------------------------------------------------------------------------------------------------------------------------------------------------------------------------------------------------------------------------------------------------------------------------------------------------------|-------------------------------------------------------------------------------------------|--------------------------------------------------------------------------------------------------------------------------------------------------------------------------------------------------------------------------------------------------------------------------------------------------------------------------------------------------------------------------------------------------------------------------------------------------------------------------------------------------------------------------------------------------------------------------------------------------|------------------------------------------------------------------------------------------------------------------------------------------------------------------------------------------|-------------------------------------------------------------------------------------------------------------------------------------------------------------------------------------------------------------------------------------------------------------------|-----------------------------------------------------|--|
|                |                                                                                                                                                                                                                                                                                                                                                                                                                                                                                                                                                                                                                                                                                                                                                                                          |                                                                                                       | ADRL.GLND.FET; PLCNT.FET;<br>LIV.ADLT; PANC; LNG; SPLN                                                                                                                                                                                                                                                                                                                                                                                                                                                                                                                                                                                                                                                                                                                                                                                                                                                                                                                                                                                                                                                                                               |                                                                                           |                                                                                                                                                                                                                                                                                                                                                                                                                                                                                                                                                                                                  |                                                                                                                                                                                          |                                                                                                                                                                                                                                                                   |                                                     |  |
| rs1762<br>2378 | <p><b>12_TxEnhW</b><br/>(BLD.PER.MONUC.PC;<br/>BLD.CD4.CD25I.CD127.TMEMPC;<br/>BLD.CD3.CPC;<br/>BLD.CD4.CD25.CD127M.TREGPC)</p> <p><b>10_TxEnh5</b><br/>(BLD.CD3.PPC; BLD.CD4.CD25M.TPC;<br/>BLD.CD4.CD25M.CD45RA.NPC;<br/>BLD.CD4.CD25M.IL17M.PL.TPC;<br/>BLD.CD4.CD25M.IL17P.PL.TPC;<br/>BLD.CD4.CD25M.CD45RO.MPC;<br/>BLD.CD4.MPC; BLD.CD8.MPC;<br/>BLD.CD4.NPC; BLD.CD8.NPC;<br/>BLD.MOB.CD34.PC.F; BLD.CD56.PC;<br/>THYM.FET)</p> <p><b>17_EnhW2</b><br/><br/>(BLD.CD14.PC; MUS.SKLT.M;<br/>GI.RECT.SM.MUS; GI.RECT.MUC.31;<br/>GI.STMC.MUC)</p> <p><b>12_TxEnhW2</b><br/><br/>(BLD.CD19.CPC; BLD.CD34.PC;<br/>BLD.MOB.CD34.PC.M; BLD.CD34.CC;<br/>BLD.CD19.PPC; BLD.CD15.PC; THYM;<br/>FAT.ADIP.NUC; GI.S.INT; GI.CLN.SIG;<br/>GI.DUO.MUC; PLCNT.FET; LIV.ADLT;<br/>LNG; SPLN)</p> | <p><b>12_TxEnhW2</b><br/><br/>(BLD.DND4<br/>1.CNCR;<br/>BLD.GM12<br/>878;<br/>BLD.CD14.<br/>MONO)</p> | <p>IPSC.DF.6.9; IPSC.DF.19.11;<br/>BLD.PER.MONUC.PC;<br/>BLD.CD3.PPC;<br/>BLD.CD4.CD25I.CD127.TMEMPC;<br/>BLD.CD3.CPC;<br/>BLD.CD4.CD25.CD127M.TREGPC;<br/>BLD.CD4.CD25M.TPC;<br/>BLD.CD4.CD25M.CD45RA.NPC;<br/>BLD.CD4.CD25M.IL17M.PL.TPC;<br/>BLD.CD4.CD25M.IL17P.PL.TPC;<br/>BLD.CD4.CD25M.CD45RO.MPC;<br/>BLD.CD4.MPC; BLD.CD8.MPC;<br/>BLD.CD4.NPC; BLD.CD8.NPC;<br/>BLD.CD14.PC; BLD.CD19.CPC;<br/>BLD.CD34.PC;<br/>BLD.MOB.CD34.PC.M;<br/>BLD.MOB.CD34.PC.F;<br/>BLD.CD34.CC; BLD.CD19.PPC;<br/>BLD.CD56.PC; BLD.CD15.PC;<br/>SKIN.PEN.FRSK.FIB.01;<br/>SKIN.PEN.FRSK.FIB.02;<br/>SKIN.PEN.FRSK.KER.03;<br/><b>BRST.MYO</b>; THYM; THYM.FET;<br/>BRN.HIPP.MID; BRN.ANT.CAUD;<br/>BRN.CING.GYR; BRN.ANG.GYR;<br/>FAT.ADIP.NUC; MUS.PSOAS;<br/>MUS.SKLT.F; MUS.SKLT.M;<br/>MUS.LEG.FET; HRT.ATR.R;<br/>HRT.VENT.L; HRT.VNT.R;<br/>VAS.AOR; GI.DUO.SM.MUS;<br/>GI.CLN.SM.MUS;<br/>GI.RECT.SM.MUS; GI.STMC.MUS;<br/>GI.STMC.FET; GI.S.INT.FET;<br/>GI.L.INT.FET; GI.S.INT; GI.CLN.SIG;<br/>GI.RECT.MUC.29;<br/>GI.RECT.MUC.31; GI.STMC.MUC;<br/>GI.DUO.MUC; GI.ESO;<br/>GI.STMC.GAST; PLCNT.AMN;<br/>PLCNT.FET; LIV.ADLT; PANC; LNG;<br/>SPLN</p> | <p>ESDR.H1.BMP<br/>4.TROP;<br/>BLD.CD8.MPC;<br/>BLD.CD4.NPC;<br/>GI.STMC.MUS;<br/>LNG</p> | <p>ESC.H9; ESC.H1;<br/>BLD.PER.MONUC.PC;<br/>BLD.CD3.PPC;<br/>BLD.CD4.CD25I.CD127.TME<br/>MPC;<br/>BLD.CD4.CD25.CD127M.TRE<br/>GPC; BLD.CD4.CD25M.TPC;<br/>BLD.CD4.CD25M.IL17M.PL.T<br/>PC;<br/>BLD.CD4.CD25M.IL17P.PL.T<br/>PC;<br/>BLD.CD4.CD25M.CD45RO.M<br/>PC; BLD.CD8.MPC;<br/>BLD.CD8.NPC;<br/>BLD.MOB.CD34.PC.F;<br/>BLD.CD56.PC;<br/>SKIN.PEN.FRSK.FIB.02;<br/>THYM; THYM.FET;<br/>BRN.HIPP.MID;<br/>BRN.ANT.CAUD;<br/>FAT.ADIP.NUC; MUS.PSOAS;<br/>HRT.VENT.L; HRT.VNT.R;<br/>GI.RECT.SM.MUS; GI.S.INT;<br/>GI.CLN.SIG;<br/>GI.RECT.MUC.29;<br/>PLCNT.FET; LIV.ADLT; LNG;<br/>SPLN</p> | <p><b>H3K4me1</b><br/>BLD.DND4<br/>1.CNCR;<br/>BLD.GM1<br/>2878;<br/>BLD.CD14.<br/>MONO</p> <p><b>H3K27ac</b><br/>BLD.DND4<br/>1.CNCR;<br/>BLD.GM1<br/>2878;<br/>BLD.CD14.<br/>MONO.</p> | <p><b>H3K4me3</b><br/>None</p> <p><b>H3K9ac</b><br/>ROADM<br/>AP<br/>BLD.PER.<br/>MONUC.<br/>PC;<br/>BRN.AN<br/>G.GYR;<br/>FAT.ADI<br/>P.NUC;<br/>MUS.SK<br/>L.T.M;<br/>HRT.FET;<br/>GI.RECT.<br/>SM.MUS<br/>;<br/>GI.STMC<br/>.MUS;<br/>GI.RECT.<br/>MUC.29.</p> |                                                     |  |
| rs1252<br>1868 | <p><b>18_EnhAc</b></p>                                                                                                                                                                                                                                                                                                                                                                                                                                                                                                                                                                                                                                                                                                                                                                   | <p><b>10_TxEnh5</b><br/>(BLD.DND4<br/>1.CNCR;<br/>BLD.CD14.<br/>MONO;</p>                             | <p>ESC.HUES6; PSC.DF.6.9;<br/>ESDR.H1.BMP4.MESO;<br/>ESDR.H1.MSC;<br/>BLD.PER.MONUC.PC;<br/>BLD.CD3.PPC;</p>                                                                                                                                                                                                                                                                                                                                                                                                                                                                                                                                                                                                                                                                                                                                                                                                                                                                                                                                                                                                                                         | <p>ROADMAP<br/>BLD.CD4.CD25<br/>M.IL17M.PL.T<br/>PC;<br/>BLD.CD4.CD25</p>                 | <p>(ESC.H1; IPSC.20B;<br/>ESDR.H1.BMP4.TROP;<br/>BLD.PER.MONUC.PC;<br/>BLD.CD3.PPC;<br/>BLD.CD4.CD25I.CD127.TME</p>                                                                                                                                                                                                                                                                                                                                                                                                                                                                              | <p>ESC.HUES6;<br/>BRN.INF.TMP;<br/>BRN.ANG.GYR;<br/>FAT.ADIP.NUC;<br/>MUS.SKLT.M;</p>                                                                                                    | <p><b>H3K4me1</b><br/>BLD.DND4<br/>1.CNCR;<br/>BLD.CD14.</p>                                                                                                                                                                                                      | <p><b>H3K4me3</b><br/>None</p> <p><b>H3K9ac</b></p> |  |

|            |                                                                                                                                                                                                                                                                                                                                                                                                                                                                                                                                                                                                                                                                                                                                                                         |                                                                |                                                                                                                                                                                                                                                                                                                                                                                                                                                                                                                                                                                                                                                                                                                                                                                                                                       |                                                       |                                                                                                                                                                                                                                                                                                                                                                                                                                                                                                         |                                                                                           |                                                                                                                              |                                                                                                           |
|------------|-------------------------------------------------------------------------------------------------------------------------------------------------------------------------------------------------------------------------------------------------------------------------------------------------------------------------------------------------------------------------------------------------------------------------------------------------------------------------------------------------------------------------------------------------------------------------------------------------------------------------------------------------------------------------------------------------------------------------------------------------------------------------|----------------------------------------------------------------|---------------------------------------------------------------------------------------------------------------------------------------------------------------------------------------------------------------------------------------------------------------------------------------------------------------------------------------------------------------------------------------------------------------------------------------------------------------------------------------------------------------------------------------------------------------------------------------------------------------------------------------------------------------------------------------------------------------------------------------------------------------------------------------------------------------------------------------|-------------------------------------------------------|---------------------------------------------------------------------------------------------------------------------------------------------------------------------------------------------------------------------------------------------------------------------------------------------------------------------------------------------------------------------------------------------------------------------------------------------------------------------------------------------------------|-------------------------------------------------------------------------------------------|------------------------------------------------------------------------------------------------------------------------------|-----------------------------------------------------------------------------------------------------------|
|            | <p>(ESDR.H1.BMP4.TROP; MUS.SKLT.F; HRT.ATR.R; HRT.VNT.R; GI.RECT.MUC.29; PLCNT.AMN; LIV.ADLT)</p> <p><b>12_TxEnhW</b></p> <p>(BLD.PER.MONUC.PC; BLD.CD19.CPC; BLD.CD19.PPC; THYM; GI.CLN.SIG; GI.DUO.MUC; PLCNT.FET; SPLN)</p> <p><b>10_TxEnh5</b></p> <p>(BLD.CD3.PPC; BLD.CD4.CD25.CD127M.TREGPC; BLD.CD4.CD25M.TPC; BLD.CD4.CD25M.CD45RA.NPC; BLD.CD4.CD25M.IL17M.PL.TPC; BLD.CD4.CD25M.CD45RO.MPC; BLD.CD4.MPC; BLD.CD8.MPC; BLD.CD4.NPC; BLD.CD8.NPC; BLD.MOB.CD34.PC.F; BLD.CD56.PC; BLD.CD15.PC; THYM.FET; FAT.ADIP.NUC; HRT.VENT.L; GI.DUO.SM.MUS)</p> <p><b>11_TxEnh5</b></p> <p>(BLD.CD4.CD25M.IL17P.PL.TPC; GI.CLN.SM.MUS)</p> <p><b>15_EnhAF</b></p> <p>(BLD.CD14.PC)</p> <p><b>17_EnhW2</b></p> <p>(SKIN.PEN.FRISK.FIB.02; GI.STMC.MUS; GI.S.INT; LNG)</p> | <p>BRN.NHA; SKIN.NHDF AD; SKIN.NHEK; LNG.NHLF; BONE.OSTEO)</p> | <p>BLD.CD4.CD25I.CD127.TMEMPC; BLD.CD4.CD25.CD127M.TREGPC; BLD.CD4.CD25M.TPC; BLD.CD4.CD25M.CD45RA.NPC; BLD.CD4.CD25M.IL17M.PL.TPC; BLD.CD4.CD25M.IL17P.PL.TPC; BLD.CD4.CD25M.CD45RO.MPC; BLD.CD4.MPC; BLD.CD8.MPC; BLD.CD4.NPC; BLD.CD8.NPC; BLD.CD14.PC; BLD.CD56.PC; BLD.CD15.PC; FAT.ADIP.DR.MSC; SKIN.PEN.FRISK.FIB.01; SKIN.PEN.FRISK.FIB.02; SKIN.PEN.FRISK.KER.02; SKIN.PEN.FRISK.KER.03; <b>BRST.HMEC.35</b>; THYM; THYM.FET; BRN.SUB.NIG; BRN.CING.GYR; BRN.ANG.GYR; BRN.DL.PRFRTL.CRTX; FAT.ADIP.NUC; MUS.PSOAS; MUS.SKLT.F; MUS.SKLT.M; MUS.LEG.FET; HRT.ATR.R; HRT.VENT.L; HRT.VNT.R; GI.DUO.SM.MUS; GI.CLN.SM.MUS; GI.RECT.SM.MUS; GI.STMC.MUS; GI.S.INT.FET; GI.S.INT; GI.CLN.SIG; GI.CLN.MUC; GI.RECT.MUC.29; GI.RECT.MUC.31; GI.STMC.MUC; GI.DUO.MUC; GI.ESO; GI.STMC.GAST; PLCNT.FET; LIV.ADLT; PANC; LNG; SPLN</p> | <p>M.IL17P.PL.TPC; GI.CLN.SM.MUS; GI.RECT.SM.MUS;</p> | <p>MPC; BLD.CD4.CD25.CD127M.TREGPC; BLD.CD4.CD25M.TPC; BLD.CD4.CD25M.CD45RA.NPC; BLD.CD4.CD25M.IL17M.PL.TPC; BLD.CD4.CD25M.IL17P.PL.TPC; BLD.CD4.CD25M.CD45RO.MPC; BLD.CD8.MPC; BLD.CD4.NPC; BLD.MOB.CD34.PC.F; BLD.CD56.PC; SKIN.PEN.FRISK.FIB.02; THYM; THYM.FET; BRN.CING.GYR; FAT.ADIP.NUC; HRT.ATR.R; HRT.VENT.L; HRT.VNT.R; GI.DUO.SM.MUS; GI.CLN.SM.MUS; GI.RECT.SM.MUS; GI.STMC.MUS; GI.STMC.FET; GI.S.INT; GI.CLN.SIG; GI.CLN.MUC; GI.RECT.MUC.31; GI.ESO; PLCNT.FET; LIV.ADLT; LNG; SPLN)</p> | <p>GI.CLN.MUC; GI.RECT.MUC.29; GI.RECT.MUC.31; GI.STMC.MUC; GI.DUO.MUC.</p>               | <p>MONO; LNG.NHLF</p> <p><b>H3K27ac</b></p> <p>BLD.DND4 1.CNCR; BLD.CD14.MONO; SKIN.NHEK.</p>                                | <p>CRVX.HE LAS3.CNCR</p>                                                                                  |
| rs12515180 | <p><b>18_EnhAc</b></p> <p>(LNG.IMR90; ESDR.H1.BMP4.TROP; PLCNT.AMN)</p> <p><b>10_TxEnh5</b></p> <p>(BLD.CD3.PPC; BLD.CD56.PC; THYM.FET; PLCNT.FET)</p> <p><b>12_TxEnhW</b></p> <p>(BLD.CD4.CD25.CD127M.TREGPC)</p>                                                                                                                                                                                                                                                                                                                                                                                                                                                                                                                                                      | <p><b>12_TxEnhW</b></p> <p>(BLD.DND4 1.CNCR)</p>               | <p>LNG.IMR90; ESC.HUES6; ESC.HUES48; ESC.HUES64; ESC.4STAR; ESDR.H1.MSC; BLD.PER.MONUC.PC; BLD.CD3.PPC; BLD.CD4.CD25.CD127M.TREGPC; BLD.CD4.CD25M.TPC; BLD.CD4.CD25M.CD45RA.NPC; BLD.CD4.CD25M.IL17M.PL.TPC; BLD.CD4.CD25M.IL17P.PL.TPC; BLD.CD4.CD25M.CD45RO.MPC; BLD.CD4.MPC; BLD.CD8.MPC;</p>                                                                                                                                                                                                                                                                                                                                                                                                                                                                                                                                      | <p>IPSC.20B; BLD.CD4.CD25M.IL17P.PL.TPC</p>           | <p>LNG.IMR90; ESC.H1; BLD.CD3.PPC; BLD.CD4.CD25I.CD127.TMEMPC; BLD.CD4.CD25.CD127M.TREGPC; BLD.CD4.CD25M.CD45RA.NPC; BLD.CD4.CD25M.IL17M.PL.TPC; BLD.CD4.CD25M.IL17P.PL.TPC;</p>                                                                                                                                                                                                                                                                                                                        | <p>ESC.H9; ESC.HUES6; FAT.ADIP.NUC; GI.RECT.MUC.29; GI.STMC.MUC; GI.DUO.MUC; LNG.FET;</p> | <p><b>H3K4me1</b></p> <p>BLD.DND4 1.CNCR; LNG.NHLF</p> <p><b>H3K27ac</b></p> <p>BLD.DND4 1.CNCR; BLD.CD14.MONO; LNG.NHLF</p> | <p><b>H3K4me3</b></p> <p>None</p> <p><b>H3K9ac</b></p> <p>LNG.A54 9.ETOHO 02.CNCR ; BLD.DND 41.CNCR ;</p> |



|                 |                                                                                                                                                                                                                                                                                                                                                                    |      |                                                                                                                                                                                                                                                                                                                                                                                                                                                                                      |                          |                                                                                                                                                                                                                                                                                                                                                                              |                                                                                                            |                                                                                                                                                                                                |                                                                                                                                                                                                                                                                                                                                      |                                                                                        |
|-----------------|--------------------------------------------------------------------------------------------------------------------------------------------------------------------------------------------------------------------------------------------------------------------------------------------------------------------------------------------------------------------|------|--------------------------------------------------------------------------------------------------------------------------------------------------------------------------------------------------------------------------------------------------------------------------------------------------------------------------------------------------------------------------------------------------------------------------------------------------------------------------------------|--------------------------|------------------------------------------------------------------------------------------------------------------------------------------------------------------------------------------------------------------------------------------------------------------------------------------------------------------------------------------------------------------------------|------------------------------------------------------------------------------------------------------------|------------------------------------------------------------------------------------------------------------------------------------------------------------------------------------------------|--------------------------------------------------------------------------------------------------------------------------------------------------------------------------------------------------------------------------------------------------------------------------------------------------------------------------------------|----------------------------------------------------------------------------------------|
|                 | <p><b>11_TxEnh3</b><br/>(BLD.CD4.CD25M.IL17M.PL.TPC;<br/>BLD.CD4.CD25M.IL17P.PL.TPC;<br/>BLD.CD14.PC; BLD.CD19.PPC;<br/>SKIN.PEN.FRSK.FIB.02; SPLN)</p> <p><b>17_EnhW2</b><br/>(SKIN.PEN.FRSK.FIB.01)</p>                                                                                                                                                          |      | <p>BLD.CD4.NPC; BLD.CD8.NPC;<br/>BLD.MOB.CD34.PC.F;<br/>BLD.CD56.PC; BLD.CD15.PC;<br/>FAT.MSC.DR.ADIP;<br/>SKIN.PEN.FRSK.FIB.02;<br/>SKIN.PEN.FRSK.KER.02;<br/>SKIN.PEN.FRSK.KER.03; THYM;<br/>THYM.FET; FAT.ADIP.NUC;<br/>HRT.ATR.R; HRT.VENT.L;<br/>HRT.VNT.R; GI.DUO.SM.MUS;<br/>GI.STMC.MUS; GI.STMC.FET;<br/>GI.S.INT.FET; GI.S.INT;<br/>GI.RECT.MUC.29; GI.STMC.MUC;<br/>GI.DUO.MUC; GI.ESO;<br/>GI.STMC.GAST; LNG.FET; OVRY;<br/>PLCNT.FET; LIV.ADLT; PANC; LNG;<br/>SPLN</p> |                          | <p>BLD.CD4.CD25M.CD45RO.M<br/>PC; BLD.CD8.MPC;<br/>BLD.CD4.NPC;<br/>BLD.CD19.PPC;<br/>BLD.CD56.PC;<br/>SKIN.PEN.FRSK.FIB.01;<br/>SKIN.PEN.FRSK.FIB.02;<br/>THYM; THYM.FET;<br/>FAT.ADIP.NUC; HRT.VNT.R;<br/>GI.DUO.SM.MUS;<br/>GI.CLN.SM.MUS;<br/>GI.RECT.SM.MUS; GI.S.INT;<br/>GI.CLN.SIG; GI.CLN.MUC;<br/>GI.RECT.MUC.31; OVRY;<br/>PLCNT.FET; LIV.ADLT; LNG;<br/>SPLN</p> |                                                                                                            | <p>BONE.OST<br/>EO</p>                                                                                                                                                                         | <p>BLD.GM<br/>12878;<br/>CRVX.HE<br/>LAS3.CN<br/>CR;<br/>LIV.HEP<br/>G2.CNCR<br/>;<br/><b>BRST.H<br/>MEC;</b><br/>MUS.HS<br/>MM;<br/>MUS.HS<br/>MMT;<br/>VAS.HUV<br/>EC;<br/>BLD.K56<br/>2.CNCR;<br/>BLD.CD1<br/>4.MONO<br/>;<br/>BRN.NH<br/>A;<br/>SKIN.NH<br/>DFAD;<br/>SKIN.NH<br/>EK;<br/>LNG.NHL<br/>F;<br/>BONE.O<br/>STEO</p> |                                                                                        |
| rs1466<br>04341 | <p><b>18_EnhAc</b><br/>(LNG.IMR90; ESDR.H1.BMP4.TROP;<br/>PLCNT.AMN)</p> <p><b>17_EnhW2</b><br/>(ESC.WA7; ESC.H9; ESC.I3; ESC.HUES6;<br/>ESC.HUES48; ESC.H1; IPSC.15b;<br/>ESDR.CD184.ENDO;<br/>ESDR.H1.BMP4.MESO; FAT.ADIP.NUC;<br/>GI.DUO.SM.MUS; KID.FET; PLCNT.FET)</p> <p><b>14_EnhA2</b><br/>(ESC.HUES64; IPSC.18)</p> <p><b>16_EnhW1</b><br/>(IPSC.20B)</p> | None | <p>LNG.IMR90; ESC.I3; ESC.HUES6;<br/>ESC.HUES48; ESC.HUES64;<br/>ESC.4STAR; IPSC.20B; IPSC.18;<br/>IPSC.15b; ESDR.H1.BMP4.MESO;<br/>ESDR.H1.BMP4.TROP;<br/>BLD.CD3.PPC;<br/>BLD.CD4.CD25.CD127M.TREGPC;<br/>BLD.CD4.CD25M.TPC;<br/>BLD.CD4.CD25M.CD45RA.NPC;<br/>BLD.CD4.CD25M.IL17M.PL.TPC;<br/>BLD.CD4.CD25M.IL17P.PL.TPC;<br/>BLD.CD4.CD25M.CD45RO.MPC;<br/>BLD.CD4.MPC; BLD.CD8.MPC;<br/>BLD.CD4.NPC; BLD.CD8.NPC;<br/>BLD.MOB.CD34.PC.F;<br/>BLD.CD56.PC; BLD.CD15.PC;</p>      | ESC.HUES64;<br>IPSC.20B; | <p>LNG.IMR90; ESC.HUES48;<br/>ESC.H1; IPSC.20B;<br/>BLD.CD3.PPC;<br/>BLD.CD4.CD25I.CD127.TME<br/>MPC;<br/>BLD.CD4.CD25.CD127M.TRE<br/>GPC;<br/>BLD.CD4.CD25M.CD45RA.N<br/>PC;<br/>BLD.CD4.CD25M.IL17M.PL.T<br/>PC;<br/>BLD.CD4.CD25M.IL17P.PL.T<br/>PC;<br/>BLD.CD4.CD25M.CD45RO.M<br/>PC; BLD.CD8.MPC;<br/>BLD.CD4.NPC;</p>                                                 | <p>LNG.IMR90;<br/>ESC.H9;<br/>FAT.ADIP.NUC;<br/>GI.STMC.MUC;<br/>GI.DUO.MUC;<br/>LNG.FET;<br/>LIV.ADLT</p> | <p><b>H3K4me1</b><br/>BLD.DND4<br/>1.CNCR;<br/>BLD.K562.<br/>CNCR;<br/>SKIN.NHE<br/>K;<br/>LNG.NHLF<br/>;<br/>BONE.OST<br/>EO</p> <p><b>H3K27ac</b><br/>BLD.DND4<br/>1.CNCR;<br/>BLD.CD14.</p> | <p><b>H3K4me<br/>3</b><br/>None</p> <p><b>H3K9ac</b><br/>None</p>                                                                                                                                                                                                                                                                    | <p>ROADMAP<br/>SKIN.PEN.F<br/>RSK.KER.02<br/>; OVRY;<br/>PLCNT.FET<br/><br/>ENCODE</p> |

|                |                                                                                                                                                                                                                                                                                                                                                                                                                                                                                                                                                                                                                                 |      |                                                                                                                                                                                                                                                                                                                                                                                                                                                                                                                                                                                                                                                                                                                                                                                                                                                                                                                                                     |                                                  |                                                                                                                                                                                                                                                                                                                                                                                                                                                                                                                                                                                       |                                                                                                                                        |                                                                                                                                                                                                                                                                                                                              |                                                                                                                                                                                                                                                                                                                                                         |                                                                                                                                              |
|----------------|---------------------------------------------------------------------------------------------------------------------------------------------------------------------------------------------------------------------------------------------------------------------------------------------------------------------------------------------------------------------------------------------------------------------------------------------------------------------------------------------------------------------------------------------------------------------------------------------------------------------------------|------|-----------------------------------------------------------------------------------------------------------------------------------------------------------------------------------------------------------------------------------------------------------------------------------------------------------------------------------------------------------------------------------------------------------------------------------------------------------------------------------------------------------------------------------------------------------------------------------------------------------------------------------------------------------------------------------------------------------------------------------------------------------------------------------------------------------------------------------------------------------------------------------------------------------------------------------------------------|--------------------------------------------------|---------------------------------------------------------------------------------------------------------------------------------------------------------------------------------------------------------------------------------------------------------------------------------------------------------------------------------------------------------------------------------------------------------------------------------------------------------------------------------------------------------------------------------------------------------------------------------------|----------------------------------------------------------------------------------------------------------------------------------------|------------------------------------------------------------------------------------------------------------------------------------------------------------------------------------------------------------------------------------------------------------------------------------------------------------------------------|---------------------------------------------------------------------------------------------------------------------------------------------------------------------------------------------------------------------------------------------------------------------------------------------------------------------------------------------------------|----------------------------------------------------------------------------------------------------------------------------------------------|
|                | <p><b>11_TxEnh3</b><br/>(BLD.CD4.CD25I.CD127.TMEMPC;<br/>BLD.CD4.CD25M.IL17P.PL.TPC)</p> <p><b>12_TxEnhW</b><br/>(BLD.CD4.CD25M.CD45RA.NPC)</p> <p><b>19_DNase</b><br/>(SKIN.PEN.FRSK.KER.03; <b>BRST.HMEC.35</b>)</p> <p><b>15_EnhAF</b><br/>(LIV.ADLT)</p>                                                                                                                                                                                                                                                                                                                                                                    |      | <p>STRM.MRW.MSC;<br/>FAT.MSC.DR.ADIP;<br/>SKIN.PEN.FRSK.FIB.01;<br/>SKIN.PEN.FRSK.FIB.02;<br/>SKIN.PEN.FRSK.KER.02;<br/>SKIN.PEN.FRSK.KER.03;<br/><b>BRST.HMEC.35</b>; THYM.FET;<br/>FAT.ADIP.NUC; GI.DUO.SM.MUS;<br/>GI.STMC.FET; GI.S.INT.FET;<br/>GI.S.INT; GI.CLN.MUC;<br/>GI.RECT.MUC.29; GI.STMC.MUC;<br/>GI.DUO.MUC; LNG.FET;<br/>PLCNT.FET; LIV.ADLT</p>                                                                                                                                                                                                                                                                                                                                                                                                                                                                                                                                                                                    |                                                  | <p>BLD.CD19.PPC;<br/>STRM.MRW.MSC;<br/>SKIN.PEN.FRSK.FIB.02;<br/>THYM.FET; FAT.ADIP.NUC;<br/>GI.DUO.SM.MUS; GI.S.INT;<br/>GI.CLN.SIG;<br/>GI.CLN.MUC;.STMC.GAST;<br/>PLCNT.AMN; KID.FET;<br/>LNG.FET; OVRY; PANC.ISLT;<br/>ADRL.GLND.FET; PLCNT.FET;<br/>LIV.ADLT; SPLN</p>                                                                                                                                                                                                                                                                                                           |                                                                                                                                        | <p>MONO;<br/>LNG.NHLF</p>                                                                                                                                                                                                                                                                                                    |                                                                                                                                                                                                                                                                                                                                                         |                                                                                                                                              |
| rs1195<br>1091 | <p><b>18_EnhAc</b><br/>(LNG.IMR90; ESDR.H1.BMP4.TROP;<br/>PLCNT.AMN)</p> <p><b>17_EnhW2</b><br/>(ESC.WA7; ESC.H9; ESC.I3; ESC.HUES6;<br/>ESC.HUES48; ESC.H1; IPSC.15b;<br/>ESDR.CD184.ENDO;<br/>ESDR.H1.BMP4.MESO; FAT.ADIP.NUC;<br/>GI.DUO.SM.MUS; KID.FET; PLCNT.FET)</p> <p><b>14_EnhA2</b><br/>(ESC.HUES64; IPSC.18)</p> <p><b>16_EnhW1</b><br/>(IPSC.20B)</p> <p><b>11_TxEnh3</b><br/>(BLD.CD4.CD25I.CD127.TMEMPC;<br/>BLD.CD4.CD25M.IL17P.PL.TPC)</p> <p><b>12_TxEnhW</b><br/>(BLD.CD4.CD25M.CD45RA.NPC)</p> <p><b>19_DNase</b><br/>(SKIN.PEN.FRSK.KER.03; <b>BRST.HMEC.35</b>)</p> <p><b>15_EnhAF</b><br/>(LIV.ADLT)</p> | None | <p>LNG.IMR90; ESC.WA7; ESC.H9;<br/>ESC.I3; ESC.HUES6; ESC.HUES48;<br/>ESC.HUES64; ESC.4STAR;<br/>IPSC.20B; IPSC.18; IPSC.15b;<br/>ESDR.H1.BMP4.MESO;<br/>ESDR.H1.BMP4.TROP;<br/>BLD.CD3.PPC;<br/>BLD.CD4.CD25.CD127M.TREGPC;<br/>BLD.CD4.CD25M.TPC;<br/>BLD.CD4.CD25M.CD45RA.NPC;<br/>BLD.CD4.CD25M.IL17M.PL.TPC;<br/>BLD.CD4.CD25M.IL17P.PL.TPC;<br/>BLD.CD4.CD25M.CD45RO.MPC;<br/>BLD.CD4.MPC; BLD.CD8.MPC;<br/>BLD.CD4.NPC; BLD.CD8.NPC;<br/>BLD.MOB.CD34.PC.F;<br/>BLD.CD56.PC; BLD.CD15.PC;<br/>STRM.MRW.MSC;<br/>STRM.CHON.MRW.DR.MSC;<br/>FAT.ADIP.DR.MSC;<br/>FAT.MSC.DR.ADIP;<br/>SKIN.PEN.FRSK.FIB.01;<br/>SKIN.PEN.FRSK.FIB.02;<br/>SKIN.PEN.FRSK.KER.02;<br/>SKIN.PEN.FRSK.KER.03;<br/><b>BRST.HMEC.35</b>; THYM.FET;<br/>FAT.ADIP.NUC; MUS.SKLT.F;<br/>MUS.SKLT.M; GI.DUO.SM.MUS;<br/>GI.STMC.FET; GI.S.INT.FET;<br/>GI.S.INT; GI.CLN.MUC;<br/>GI.RECT.MUC.29; GI.STMC.MUC;<br/>GI.DUO.MUC; LNG.FET; OVRY;<br/>PLCNT.FET; LIV.ADLT</p> | <p>ESC.HUES48;<br/>ESC.HUES64;<br/>IPSC.20B.</p> | <p>LNG.IMR90; ESC.HUES48;<br/>ESC.H1; IPSC.20B;<br/>ESDR.H1.MSC;<br/>BLD.CD3.PPC;<br/>BLD.CD4.CD25I.CD127.TME<br/>MPC;<br/>BLD.CD4.CD25.CD127M.TRE<br/>GPC;<br/>BLD.CD4.CD25M.CD45RA.N<br/>PC;<br/>BLD.CD4.CD25M.IL17M.PL.T<br/>PC;<br/>BLD.CD4.CD25M.IL17P.PL.T<br/>PC;<br/>BLD.CD4.CD25M.CD45RO.M<br/>PC; BLD.CD8.MPC;<br/>BLD.CD4.NPC;<br/>BLD.CD19.PPC;<br/>BLD.CD56.PC;<br/>STRM.MRW.MSC;<br/>SKIN.PEN.FRSK.FIB.02;<br/>THYM; THYM.FET;<br/>FAT.ADIP.NUC;<br/>GI.DUO.SM.MUS; GI.S.INT;<br/>GI.CLN.SIG; GI.CLN.MUC;<br/>GI.RECT.MUC.31; GI.ESO;<br/>PLCNT.FET; LIV.ADLT; SPLN</p> | <p>LNG.IMR90;<br/>ESC.H9;<br/>ESC.HUES64;<br/>ESC.H1;<br/>FAT.ADIP.NUC;<br/>GI.STMC.MUC;<br/>GI.DUO.MUC;<br/>LNG.FET;<br/>LIV.ADLT</p> | <p><b>H3K4me1</b><br/>BLD.DND4<br/>1.CNCR;<br/><b>BRST.HMEC</b><br/>C;<br/>MUS.HSM<br/>M;<br/>MUS.HSM<br/>MT;<br/>VAS.HUVE<br/>C;<br/>BLD.K562.<br/>CNCR;<br/>BRN.NHA;<br/>SKIN.NHE<br/>K;<br/>LNG.NHLF<br/>;<br/>BONE.OST<br/>EO.<br/><br/><b>H3K27ac</b><br/>BLD.DND4<br/>1.CNCR;<br/>BLD.CD14.<br/>MONO;<br/>LNG.NHLF</p> | <p><b>H3K4me3</b><br/>None<br/><br/><b>H3K9ac</b><br/>LNG.A54<br/>9.ETOHO<br/>02.CNCR<br/>;<br/>BLD.DND<br/>41.CNCR<br/>;<br/>BLD.GM<br/>12878;<br/>CRVX.HE<br/>LAS3.CN<br/>CR;<br/>LIV.HEP<br/>G2.CNCR<br/>;<br/><b>BRST.HMEC</b>;<br/>MUS.HS<br/>MM;<br/>MUS.HS<br/>MMT;<br/>VAS.HUV<br/>EC;<br/>BLD.K56<br/>2.CNCR;<br/>BLD.CD1<br/>4.MONO<br/>;</p> | <p>ROADMAP<br/>ESC.H1;<br/>IPSC.DF.6.9<br/>;<br/>IPSC.DF.19.<br/>11;<br/>ESDR.H1.M<br/>SC;<br/>SKIN.PEN.F<br/>RSK.KER.02<br/>; PLCNT.FET</p> |

|               |                                                                                                                                                                                                                                                                                                                                                                                                                                                                                                                                                                                                                                                                                                                                                                                                                                                                                                         |                                                                                                                                                                                                                                                                                                                                                     |                                                                                                                                                                                                                                                                                                                                                                                                                                                                                                                                                                                                                                                                                                                                                                                                                                                                                                                                                                                                                                                          |                                                                                        |                                                                                                                                                                                                                                                                                                                                                                                                                                                                                                                                                                                                                        |                                                                                                                                       |                                                                                                                                                                                                                                                                                     |                                                                                       |                      |
|---------------|---------------------------------------------------------------------------------------------------------------------------------------------------------------------------------------------------------------------------------------------------------------------------------------------------------------------------------------------------------------------------------------------------------------------------------------------------------------------------------------------------------------------------------------------------------------------------------------------------------------------------------------------------------------------------------------------------------------------------------------------------------------------------------------------------------------------------------------------------------------------------------------------------------|-----------------------------------------------------------------------------------------------------------------------------------------------------------------------------------------------------------------------------------------------------------------------------------------------------------------------------------------------------|----------------------------------------------------------------------------------------------------------------------------------------------------------------------------------------------------------------------------------------------------------------------------------------------------------------------------------------------------------------------------------------------------------------------------------------------------------------------------------------------------------------------------------------------------------------------------------------------------------------------------------------------------------------------------------------------------------------------------------------------------------------------------------------------------------------------------------------------------------------------------------------------------------------------------------------------------------------------------------------------------------------------------------------------------------|----------------------------------------------------------------------------------------|------------------------------------------------------------------------------------------------------------------------------------------------------------------------------------------------------------------------------------------------------------------------------------------------------------------------------------------------------------------------------------------------------------------------------------------------------------------------------------------------------------------------------------------------------------------------------------------------------------------------|---------------------------------------------------------------------------------------------------------------------------------------|-------------------------------------------------------------------------------------------------------------------------------------------------------------------------------------------------------------------------------------------------------------------------------------|---------------------------------------------------------------------------------------|----------------------|
|               |                                                                                                                                                                                                                                                                                                                                                                                                                                                                                                                                                                                                                                                                                                                                                                                                                                                                                                         |                                                                                                                                                                                                                                                                                                                                                     |                                                                                                                                                                                                                                                                                                                                                                                                                                                                                                                                                                                                                                                                                                                                                                                                                                                                                                                                                                                                                                                          |                                                                                        |                                                                                                                                                                                                                                                                                                                                                                                                                                                                                                                                                                                                                        |                                                                                                                                       |                                                                                                                                                                                                                                                                                     | BRN.NH<br>A;<br>SKIN.NH<br>DFAD;<br>SKIN.NH<br>EK;<br>LNG.NHL<br>F;<br>BONE.O<br>STEO |                      |
| rs6866<br>614 | <p><b>14_EnhW2</b><br/>(LNG.IMR90; IPSC.18)</p> <p><b>17_EnhW2</b><br/>(ESC.WA7; ESC.I3; ESC.HUES6;<br/>ESC.HUES48; ESC.HUES64; ESC.H1;<br/>ESC.4STAR; IPSC.20B; PSC.DF.6.9;<br/>IPSC.DF.19.11; ESDR.H1.NEUR.PROG;<br/>ESDR.H9.NEUR; ESDR.CD56.ECTO;<br/>ESDR.CD184.ENDO;<br/>ESDR.H1.BMP4.MESO; ESDR.H1.MSC;<br/>STRM.MRW.MSC; FAT.ADIP.DR.MSC;<br/>FAT.MSC.DR.ADIP; MUS.SAT;<br/>SKIN.PEN.FRSK.FIB.01;<br/>SKIN.PEN.FRSK.FIB.02;<br/>SKIN.PEN.FRSK.MEL.01;<br/>SKIN.PEN.FRSK.KER.02; <b>BRST.HMEC.35</b>;<br/><b>BRST.MYO</b>; LNG)</p> <p><b>15_EnhAF</b><br/>(ESC.H9; ESDR.H1.BMP4.TROP)</p> <p><b>16_EnhW1</b><br/>(IPSC.15b; STRM.CHON.MRW.DR.MSC)</p> <p><b>10_TxEnh5</b><br/>(BLD.CD3.PPC; BLD.CD4.CD25M.TPC;<br/>PLCNT.FET)</p> <p><b>12_TxEnhW</b><br/>(BLD.CD4.CD25M.CD45RA.NPC;<br/>BLD.CD4.NPC)</p> <p><b>11_TxEnh3</b><br/>(BLD.CD4.CD25M.IL17P.PL.TPC;<br/>BLD.CD14.PC; BLD.CD56.PC;</p> | <p><b>17_EnhW2</b><br/>(LNG.A549.<br/>ETOH002.C<br/>NCR;<br/>CRVX.HEL<br/>S3.CNCR;<br/>MUS.HSM<br/>M;<br/>MUS.HSM<br/>MT;<br/>BRN.NHA;<br/>SKIN.NHDF<br/>AD;<br/>SKIN.NHEK;<br/>LNG.NHLF)</p> <p><b>10_TxEnh<br/>W2</b><br/>(BLD.DND4<br/>1.CNCR)</p> <p><b>11_TxEnh3</b><br/>(BLD.K562.<br/>CNCR)</p> <p><b>15_EnhAF</b><br/>(BONE.OST<br/>EO)</p> | <p>LNG.IMR90; ESC.WA7; ESC.H9;<br/>ESC.I3; ESC.HUES6; ESC.HUES48;<br/>ESC.HUES64; ESC.H1; ESC.4STAR;<br/>IPSC.20B; IPSC.18; IPSC.15b;<br/>PSC.DF.6.9; ESDR.H1.NEUR.PROG;<br/>ESDR.H1.BMP4.MESO;<br/>ESDR.H1.BMP4.TROP;<br/>ESDR.H1.MSC; BLD.CD3.PPC;<br/>BLD.CD4.CD25I.CD127.TMEMPC;<br/>BLD.CD4.CD25.CD127M.TREGPC;<br/>BLD.CD4.CD25M.TPC;<br/>BLD.CD4.CD25M.CD45RA.NPC;<br/>BLD.CD4.CD25M.IL17M.PL.TPC;<br/>BLD.CD4.CD25M.IL17P.PL.TPC;<br/>BLD.CD4.CD25M.CD45RO.MPC;<br/>BLD.CD4.MPC; BLD.CD8.MPC;<br/>BLD.CD4.NPC; BLD.CD8.NPC;<br/>BLD.MOB.CD34.PC.F;<br/>BLD.CD19.PPC; BLD.CD56.PC;<br/>BLD.CD15.PC; STRM.MRW.MSC;<br/>STRM.CHON.MRW.DR.MSC;<br/>FAT.ADIP.DR.MSC;<br/>FAT.MSC.DR.ADIP;<br/>SKIN.PEN.FRSK.FIB.01;<br/>SKIN.PEN.FRSK.FIB.02;<br/>SKIN.PEN.FRSK.KER.02;<br/><b>BRST.HMEC.35</b>; THYM.FET;<br/>MUS.PSOAS; MUS.SKLT.F;<br/>MUS.SKLT.M; GI.DUO.SM.MUS;<br/>GI.STMC.FET; GI.S.INT.FET;<br/>GI.S.INT; GI.CLN.MUC;<br/>GI.RECT.MUC.29; GI.STMC.MUC;<br/>GI.DUO.MUC; GI.ESO;<br/>PLCNT.AMN; LNG.FET;<br/>PLCNT.FET; LIV.ADLT; LNG; SPLN</p> | <p>HUES48;<br/>IPSC.20B;<br/>BLD.CD4.CD25<br/>M.IL17P.PL.TP<br/>C;<br/>BLD.CD4.NPC</p> | <p>LNG.IMR90; ESC.HUES48;<br/>ESC.H1; IPSC.20B;<br/>IPSC.DF.6.9; BLD.CD3.PPC;<br/>BLD.CD4.CD25I.CD127.TME<br/>MPC;<br/>BLD.CD4.CD25.CD127M.TRE<br/>GPC;<br/>BLD.CD4.CD25M.CD45RA.N<br/>PC;<br/>BLD.CD4.CD25M.IL17M.PL.T<br/>PC;<br/>BLD.CD4.CD25M.IL17P.PL.T<br/>PC;<br/>BLD.CD4.CD25M.CD45RO.M<br/>PC; BLD.CD4.MPC;<br/>BLD.CD8.MPC;<br/>BLD.CD4.NPC;<br/>BLD.CD19.PPC;<br/>BLD.CD56.PC;<br/>STRM.MRW.MSC;<br/>SKIN.PEN.FRSK.FIB.02;<br/>THYM; THYM.FET;<br/>FAT.ADIP.NUC; HRT.VNT.R;<br/>GI.DUO.SM.MUS; GI.S.INT;<br/>GI.CLN.SIG; GI.CLN.MUC;<br/>GI.RECT.MUC.31; GI.ESO;<br/>PLCNT.FET; LIV.ADLT; LNG;<br/>SPLN</p> | <p>LNG.IMR90;<br/>ESC.H9;<br/>ESC.HUES64;<br/>ESC.H1;<br/>ESDR.H1.BMP4.<br/>TROP;<br/>FAT.ADIP.NUC;<br/>GI.STMC.MUC;<br/>LNG.FET.</p> | <p><b>H3K4me1</b><br/>BLD.DND4<br/>1.CNCR;<br/><b>BRST.HME<br/>C</b>;<br/>BLD.K562.<br/>CNCR;<br/>BRN.NHA;<br/>SKIN.NHD<br/>FAD;<br/>SKIN.NHE<br/>K;<br/>LNG.NHLF<br/>;<br/>BONE.OST<br/>EO</p> <p><b>H3K27ac</b><br/>BLD.DND4<br/>1.CNCR;<br/>BLD.CD14.<br/>MONO;<br/>LNG.NHLF</p> | <p><b>H3K4me<br/>3</b><br/>None</p> <p><b>H3K9ac</b><br/>None</p>                     | ROADMAP<br>PLCNT.FET |

|               |                                                                                                                                                                                                                                                                                                                                                                                                                                                                                                                                                                                                                                                                                                                                                                                                                                                                                                                                                                                                                                                            |                                                                                                                                                                                                                                                                                                                                                                                                               |                                                                                                                                                                                                                                                                                                                                                                                                                                                                                                                                                                                                                                                                                                                                                                                                                                                                                                                                                                                                                                                        |                                                                                                                                                                                                                                                                                                                                                                                                                                                                                                                                                                                                                                                                                                                                                 |                                                                                                                                                                                                                                                                                                                                                                                                                                                                                                                                                                                                                                                                                                                                                                     |                                                                                                                                                                                                                                                                                                                                                                                                                                                                                                                          |                                                                                                                                                                                                                                                                                                                                                                                                                        |                                                                                                                                                                                                                                                                                                                                                    |                                                                                                                                                                                                                                                                                                                                                                                                                                                |
|---------------|------------------------------------------------------------------------------------------------------------------------------------------------------------------------------------------------------------------------------------------------------------------------------------------------------------------------------------------------------------------------------------------------------------------------------------------------------------------------------------------------------------------------------------------------------------------------------------------------------------------------------------------------------------------------------------------------------------------------------------------------------------------------------------------------------------------------------------------------------------------------------------------------------------------------------------------------------------------------------------------------------------------------------------------------------------|---------------------------------------------------------------------------------------------------------------------------------------------------------------------------------------------------------------------------------------------------------------------------------------------------------------------------------------------------------------------------------------------------------------|--------------------------------------------------------------------------------------------------------------------------------------------------------------------------------------------------------------------------------------------------------------------------------------------------------------------------------------------------------------------------------------------------------------------------------------------------------------------------------------------------------------------------------------------------------------------------------------------------------------------------------------------------------------------------------------------------------------------------------------------------------------------------------------------------------------------------------------------------------------------------------------------------------------------------------------------------------------------------------------------------------------------------------------------------------|-------------------------------------------------------------------------------------------------------------------------------------------------------------------------------------------------------------------------------------------------------------------------------------------------------------------------------------------------------------------------------------------------------------------------------------------------------------------------------------------------------------------------------------------------------------------------------------------------------------------------------------------------------------------------------------------------------------------------------------------------|---------------------------------------------------------------------------------------------------------------------------------------------------------------------------------------------------------------------------------------------------------------------------------------------------------------------------------------------------------------------------------------------------------------------------------------------------------------------------------------------------------------------------------------------------------------------------------------------------------------------------------------------------------------------------------------------------------------------------------------------------------------------|--------------------------------------------------------------------------------------------------------------------------------------------------------------------------------------------------------------------------------------------------------------------------------------------------------------------------------------------------------------------------------------------------------------------------------------------------------------------------------------------------------------------------|------------------------------------------------------------------------------------------------------------------------------------------------------------------------------------------------------------------------------------------------------------------------------------------------------------------------------------------------------------------------------------------------------------------------|----------------------------------------------------------------------------------------------------------------------------------------------------------------------------------------------------------------------------------------------------------------------------------------------------------------------------------------------------|------------------------------------------------------------------------------------------------------------------------------------------------------------------------------------------------------------------------------------------------------------------------------------------------------------------------------------------------------------------------------------------------------------------------------------------------|
|               | BLD.CD15.PC; FAT.ADIP.NUC;<br>MUS.SKLT.M)<br><br><b>10_TxEnh5</b><br>(BLD.CD4.CD25M.CD45RO.MPC)<br><br><b>18_EnhAc</b><br>(PLCNT.AMN)                                                                                                                                                                                                                                                                                                                                                                                                                                                                                                                                                                                                                                                                                                                                                                                                                                                                                                                      |                                                                                                                                                                                                                                                                                                                                                                                                               |                                                                                                                                                                                                                                                                                                                                                                                                                                                                                                                                                                                                                                                                                                                                                                                                                                                                                                                                                                                                                                                        |                                                                                                                                                                                                                                                                                                                                                                                                                                                                                                                                                                                                                                                                                                                                                 |                                                                                                                                                                                                                                                                                                                                                                                                                                                                                                                                                                                                                                                                                                                                                                     |                                                                                                                                                                                                                                                                                                                                                                                                                                                                                                                          |                                                                                                                                                                                                                                                                                                                                                                                                                        |                                                                                                                                                                                                                                                                                                                                                    |                                                                                                                                                                                                                                                                                                                                                                                                                                                |
| rs4705<br>950 | <b>13_EnhA1</b><br>(LNG.IMR90; ESDR.H1.MSC;<br>BLD.PER.MONUC.PC; BLD.CD3.CPC;<br>BLD.CD34.PC; STRM.MRW.MSC;<br>STRM.CHON.MRW.DR.MSC;<br>FAT.ADIP.DR.MSC; FAT.MSC.DR.ADIP;<br>MUS.SAT; SKIN.PEN.FRSK.FIB.01;<br>SKIN.PEN.FRSK.FIB.02;<br>SKIN.PEN.FRSK.KER.02; FAT.ADIP.NUC;<br>MUS.SKLT.F; GI.L.INT.FET; GI.S.INT;<br>GI.CLN.SIG; GI.CLN.MUC;<br>GI.RECT.MUC.29; GI.RECT.MUC.31;<br>GI.STMC.MUC; GI.ESO; PLCNT.FET;<br>LIV.ADLT; LNG; SPLN)<br><br><b>17EnhW2</b><br>ESC.WA7; ESC.H9; ESC.I3;<br><br><b>19_DNase</b><br>(ESC.HUES6; IPSC.18)<br><br><b>17_EnhW2</b><br>(ESC.H1; ESC.4STAR; IPSC.15b;<br>PSC.DF.6.9; ESDR.H9.NEUR.PROG;<br>BRN.CRTX.DR.NRSPHR)<br><br><b>15_EnhAF</b><br>(IPSC.DF.19.11; ESDR.H1.BMP4.TROP;<br>SKIN.PEN.FRSK.MEL.01;<br>SKIN.PEN.FRSK.MEL.03; <b>BRST.HMEC.35</b> ;<br>BRN.SUB.NIG; BRN.ANT.CAUD;<br>BRN.CING.GYR; BRN.INF.TMP;<br>BRN.ANG.GYR; BRN.FET.M;<br>MUS.LEG.FET; HRT.FET; HRT.ATR.R;<br>HRT.VENT.L; HRT.VNT.R; VAS.AOR;<br>GI.STMC.GAST; KID.FET; OVRY;<br>PANC.ISLT; ADRL.GLND.FET; PANC)<br><br><b>14_EnhA2</b> | <b>15_EnhAF</b><br><br>(LNG.A549.<br>ETOHO02.C<br>NCR;<br>CRVX.HELA<br>S3.CNCR;<br>LIV.HEPG2.<br>CNCR;<br><b>BRST.HMEC</b><br>;<br>VAS.HUVEC<br>;<br>BLD.K562.C<br>NCR;<br>BRN.NHA)<br><br><b>3_PromD1</b><br>(BLD.DND4<br>1.CNCR)<br><br><b>9_TxReg</b><br>(BLD.GM12<br>878;<br>BLD.CD14.<br>MONO)<br><br><b>13_EnhA1</b><br>(MUS.HSM<br>M;<br>MUS.HSM<br>MT;<br>SKIN.NHDF<br>AD;<br>SKIN.NHEK;<br>LNG.NHLF; | LNG.IMR90; ESC.WA7; ESC.H9;<br>ESC.I3; ESC.HUES6; ESC.HUES48;<br>ESC.H1; ESC.4STAR; IPSC.20B;<br>IPSC.18; IPSC.15b; IPSC.DF.19.11;<br>ESDR.H9.NEUR.PROG;<br>ESDR.CD56.MESO;<br>ESDR.H1.BMP4.TROP;<br>ESDR.H1.MSC;<br>BLD.PER.MONUC.PC;<br>BLD.CD3.PPC;<br>BLD.CD4.CD25I.CD127.TMEMPC;<br>BLD.CD3.CPC;<br>BLD.CD4.CD25.CD127M.TREGPC;<br>BLD.CD4.CD25M.TPC;<br>BLD.CD4.CD25M.CD45RA.NPC;<br>BLD.CD4.CD25M.IL17M.PL.TPC;<br>BLD.CD4.CD25M.IL17P.PL.TPC;<br>BLD.CD4.CD25M.CD45RO.MPC;<br>BLD.CD4.MPC; BLD.CD8.MPC;<br>BLD.CD4.NPC; BLD.CD8.NPC;<br>BLD.CD14.PC; BLD.CD19.CPC;<br>BLD.CD34.PC;<br>BLD.MOB.CD34.PC.M;<br>BLD.MOB.CD34.PC.F;<br>BLD.CD34.CC; BLD.CD19.PPC;<br>BLD.CD56.PC; BLD.CD15.PC;<br>STRM.MRW.MSC;<br>STRM.CHON.MRW.DR.MSC;<br>FAT.ADIP.DR.MSC;<br>FAT.MSC.DR.ADIP; MUS.SAT;<br>SKIN.PEN.FRSK.FIB.01;<br>SKIN.PEN.FRSK.FIB.02;<br>SKIN.PEN.FRSK.KER.02;<br>SKIN.PEN.FRSK.KER.03;<br><b>BRST.HMEC.35; BRST.MYO</b> ;<br>THYM; THYM.FET; BRN.HIPP.MID;<br>BRN.ANT.CAUD; BRN.CING.GYR;<br>BRN.DL.PRFRTL.CRTX;<br>FAT.ADIP.NUC; MUS.PSOAS; | ESDR.H1.NEU<br>R.PROG;<br>BLD.CD3.PPC;<br>BLD.CD4.CD25<br>I.CD127.TME<br>MPC;<br>BLD.CD3.CPC;<br>BLD.CD4.CD25<br>.CD127M.TRE<br>GPC;<br>BLD.CD4.CD25<br>M.TPC;<br>BLD.CD4.CD25<br>M.CD45RA.NP<br>C;<br>BLD.CD4.CD25<br>M.IL17M.PL.T<br>PC;<br>BLD.CD4.CD25<br>M.IL17P.PL.TP<br>C;<br>BLD.CD4.CD25<br>M.CD45RO.M<br>PC;<br>BLD.CD4.MPC;<br>BLD.CD8.MPC;<br>BLD.CD4.NPC;<br>BLD.CD8.NPC;<br>BLD.CD14.PC;<br>BLD.CD19.PPC;<br>BLD.CD56.PC;<br>STRM.MRW.MSC;<br>STRM.CHON.MRW.DR.MSC;<br>SKIN.PEN.FRSK.FIB.01;<br>SKIN.PEN.FRSK.FIB.02;<br>SKIN.PEN.FRSK.KER.03;<br>BRN.HIPP.MID;<br>BRN.SUB.NIG;<br>BRN.ANT.CAUD;<br>BRN.CING.GYR;<br>BRN.INF.TMP;<br>FAT.ADIP.NUC; MUS.PSOAS;<br>MUS.SKLT.F;<br>MUS.LEG.FET; HRT.ATR.R;<br>HRT.VENT.L; HRT.VNT.R; | LNG.IMR90; ESC.H1;<br>IPSC.DF.19.11;<br>ESDR.H1.MSC;<br>BLD.PER.MONUC.PC;<br>BLD.CD3.PPC;<br>BLD.CD4.CD25I.CD127.TME<br>MPC;<br>BLD.CD4.CD25.CD127M.TRE<br>GPC; BLD.CD4.CD25M.TPC;<br>BLD.CD4.CD25M.CD45RA.N<br>PC;<br>BLD.CD4.CD25M.IL17M.PL.T<br>PC;<br>BLD.CD4.CD25M.IL17P.PL.T<br>PC;<br>BLD.CD4.CD25M.CD45RO.M<br>PC; BLD.CD4.MPC;<br>BLD.CD8.MPC;<br>BLD.CD4.NPC;<br>BLD.CD8.NPC; BLD.CD14.PC;<br>BLD.MOB.CD34.PC.F;<br>BLD.CD19.PPC;<br>BLD.CD56.PC;<br>STRM.MRW.MSC;<br>STRM.CHON.MRW.DR.MSC;<br>SKIN.PEN.FRSK.FIB.01;<br>SKIN.PEN.FRSK.FIB.02;<br>SKIN.PEN.FRSK.KER.03;<br>BRN.HIPP.MID;<br>BRN.SUB.NIG;<br>BRN.ANT.CAUD;<br>BRN.CING.GYR;<br>BRN.INF.TMP;<br>FAT.ADIP.NUC; MUS.PSOAS;<br>MUS.SKLT.F;<br>MUS.LEG.FET; HRT.ATR.R;<br>HRT.VENT.L; HRT.VNT.R; | LNG.IMR90;<br>ESC.HUES48;<br>ESC.HUES64;<br>IPSC.15b;<br>ESDR.H1.NEUR.<br>PROG;<br>ESDR.H9.NEUR.<br>PROG;<br>BLD.PER.MONU<br>C.PC;<br>BLD.CD4.NPC;<br>BLD.CD8.NPC;<br>STRM.MRW.MS<br>C;<br>STRM.CHON.M<br>RW.DR.MSC;<br>FAT.ADIP.DR.M<br>SC;<br>FAT.MSC.DR.AD<br>IP; MUS.SAT;<br>BRN.ANT.CAUD<br>;<br>FAT.ADIP.NUC;<br>MUS.SKLT.F;<br>MUS.SKLT.M;<br>HRT.FET;<br>GI.RECT.SM.MU<br>S;<br>GI.STMC.MUS;<br>GI.CLN.MUC;<br>GI.RECT.MUC.2<br>9;<br>GI.RECT.MUC.3<br>1;<br>GI.STMC.MUC;<br>GI.DUO.MUC;<br>LNG.FET;<br>LIV.ADLT | <b>H3K4me1</b><br>BLD.DND4<br>1.CNCR;<br>BLD.GM1<br>2878;<br>CRVX.HEL<br>AS3.CNCR<br>;<br>LIV.HEPG2<br>.CNCR;<br><b>BRST.HME<br/>C</b> ;<br>MUS.HSM<br>M;<br>MUS.HSM<br>MT;<br>VAS.HUVE<br>C;<br>BLD.K562.<br>CNCR;<br>BLD.CD14.<br>MONO;<br>BRN.NHA;<br>SKIN.NHD<br>FAD;<br>SKIN.NHE<br>K;<br>LNG.NHLF<br>;<br>BONE.OST<br>EO<br><br><b>H3K27ac</b><br>BLD.DND4<br>1.CNCR;<br>BLD.GM1<br>2878;<br>LIV.HEPG2<br>.CNCR; | <b>H3K4me<br/>3</b><br>BLD.DND<br>41.CNCR<br>;<br>BLD.GM<br>12878;<br>MUS.HS<br>MMT;<br>BLD.CD1<br>4.MONO<br>;<br>SKIN.NH<br>EK<br><br><b>H3K9ac</b><br>BLD.DND<br>41.CNCR<br>;<br>BLD.GM<br>12878;<br>LIV.HEP<br>G2.CNCR<br>;<br>MUS.HS<br>MMT;<br>BLD.K56<br>2.CNCR;<br>BLD.CD1<br>4.MONO<br>;<br>BRN.NH<br>A;<br>SKIN.NH<br>EK;<br>LNG.NHL<br>F | <b>ROADMAP</b><br>LNG.IMR90<br>,<br>ESDR.H1.M<br>SC,<br>BLD.CD3.PP<br>C,<br>BLD.CD3.CP<br>C,<br>BLD.CD14.P<br>C,<br>BLD.MOB.C<br>D34.PC.M,<br>BLD.MOB.C<br>D34.PC.F,<br>BLD.CD19.P<br>PC,<br>BLD.CD56.P<br>C,<br>SKIN.PEN.F<br>RSK.FIB.01,<br>SKIN.PEN.F<br>RSK.FIB.02,<br>THYM.FET,<br>MUS.PSOA<br>S,<br>PLCNT.FET,<br>PANC<br><br><b>ENCODE</b><br>BLD.GM12<br>878,<br><b>BRST.HMEC</b><br>,<br>MUS.HSM<br>M,<br>MUS.HSM<br>MT,<br>BLD.CD14. |

|                |                                                                                                                                                                                                                                                                                                                                                                                                                                                                                                                                                                                                                                                                                                                                                                                                                                                                                                                                                                                   |                                                                                    |                                                                                                                                                                                                                                                                                                                                                                                                                                        |                                                                                                                                                                                                                                                                                                  |                                                                                                                                                                                                                                                                                    |                                                                                                                                                                       |                                                                                    |                                                                  |                                                         |
|----------------|-----------------------------------------------------------------------------------------------------------------------------------------------------------------------------------------------------------------------------------------------------------------------------------------------------------------------------------------------------------------------------------------------------------------------------------------------------------------------------------------------------------------------------------------------------------------------------------------------------------------------------------------------------------------------------------------------------------------------------------------------------------------------------------------------------------------------------------------------------------------------------------------------------------------------------------------------------------------------------------|------------------------------------------------------------------------------------|----------------------------------------------------------------------------------------------------------------------------------------------------------------------------------------------------------------------------------------------------------------------------------------------------------------------------------------------------------------------------------------------------------------------------------------|--------------------------------------------------------------------------------------------------------------------------------------------------------------------------------------------------------------------------------------------------------------------------------------------------|------------------------------------------------------------------------------------------------------------------------------------------------------------------------------------------------------------------------------------------------------------------------------------|-----------------------------------------------------------------------------------------------------------------------------------------------------------------------|------------------------------------------------------------------------------------|------------------------------------------------------------------|---------------------------------------------------------|
|                | <p>(ESDR.H1.NEUR.PROG; SKIN.PEN.FRISK.KER.03; <b>BRST.MYO</b>; BRN.HIPP.MID; BRN.DL.PRFRTL.CRTX; MUS.PSOAS; MUS.TRNK.FET; GI.CLN.SM.MUS; GI.RECT.SM.MUS; PLCNT.AMN; LNG.FET)</p> <p><b>18_EnhW2</b><br/>(ESDR.CD56.MESO; BRN.GRM.MTRX)</p> <p><b>19_DNase</b><br/>(ESDR.CD184.ENDO; BRN.GANGEM.DR.NRSPHR; BRN.FET.F)</p> <p><b>3_PromD1</b><br/>(BLD.CD3.PPC;<br/>BLD.CD4.CD25I.CD127.TMEMPC;<br/>BLD.CD4.CD25.CD127M.TREGPC;<br/>BLD.CD4.CD25M.TPC;<br/>BLD.CD4.CD25M.CD45RA.NPC;<br/>BLD.CD4.CD25M.IL17M.PL.TPC;<br/>BLD.CD4.CD25M.IL17P.PL.TPC;<br/>BLD.CD4.CD25M.CD45RO.MPC;<br/>BLD.CD4.MPC; BLD.CD8.MPC;<br/>BLD.CD4.NPC; BLD.CD8.NPC;<br/>BLD.CD19.PPC; BLD.CD56.PC;<br/>BLD.CD15.PC; THYM.FET)</p> <p><b>2_PromD1</b><br/>(BLD.CD14.PC; BLD.CD19.CPC;<br/>BLD.MOB.CD34.PC.M;<br/>BLD.MOB.CD34.PC.F; BLD.CD34.CC)</p> <p><b>9_TxReg</b><br/>(THYM; MUS.SKLT.M; GI.DUO.SM.MUS;<br/>GI.STMC.MUS; GI.S.INT.FET;<br/>GI.DUO.MUC)</p> <p><b>10_TxEnh5</b><br/>(GI.STMC.FET)</p> | BONE.OSTEO)                                                                        | MUS.SKLT.F; MUS.SKLT.M;<br>MUS.TRNK.FET; MUS.LEG.FET;<br>HRT.ATR.R; HRT.VENT.L;<br>HRT.VNT.R; GI.DUO.SM.MUS;<br>GI.CLN.SM.MUS;<br>GI.RECT.SM.MUS; GI.STMC.MUS;<br>GI.STMC.FET; GI.S.INT.FET;<br>GI.L.INT.FET; GI.S.INT; GI.CLN.SIG;<br>GI.CLN.MUC; GI.RECT.MUC.29;<br>GI.RECT.MUC.31; GI.STMC.MUC;<br>GI.DUO.MUC; GI.ESO;<br>GI.STMC.GAST; PLCNT.AMN;<br>LNG.FET; PANC.ISLT;<br>ADRL.GLND.FET; PLCNT.FET;<br>LIV.ADLT; PANC; LNG; SPLN | BLD.CD15.PC;<br>STRM.MRW.<br>MSC;<br>FAT.ADIP.DR.<br>MSC;<br>FAT.MSC.DR.A<br>DIP; MUS.SAT;<br>SKIN.PEN.FRS<br>K.FIB.01;<br>SKIN.PEN.FRS<br>K.FIB.02;<br>GI.DUO.SM.M<br>US;<br>GI.RECT.SM.M<br>US;<br>GI.STMC.MUS;<br>GI.RECT.MUC.<br>29;<br>GI.STMC.MUC<br>;<br>GI.DUO.MUC;<br>LIV.ADLT;<br>SPLN | VAS.AOR; GI.DUO.SM.MUS;<br>GI.RECT.SM.MUS;<br>GI.STMC.MUS;<br>GI.STMC.FET; GI.S.INT.FET;<br>GI.L.INT.FET; GI.S.INT;<br>GI.CLN.SIG; GI.CLN.MUC;<br>GI.RECT.MUC.29;<br>GI.RECT.MUC.31; GI.ESO;<br>GI.STMC.GAST; PLCNT.AMN;<br>ADRL.GLND.FET; PLCNT.FET;<br>LIV.ADLT; PANC; LNG; SPLN | <b>BRST.HME<br/>C;</b><br>MUS.HSM<br>M;<br>MUS.HSM<br>MT;;<br>BLD.CD14.<br>MONO;<br>BRN.NHA;<br>SKIN.NHD<br>FAD;<br>SKIN.NHE<br>K;<br>LNG.NHLF<br>;<br>BONE.OST<br>EO | MONO,<br>BRN.NHA,<br>SKIN.NHDF<br>AD,<br>LNG.NHLF                                  |                                                                  |                                                         |
| rs7279<br>7303 | <p><b>17_EnhW2</b><br/>(LNG.IMR90; IPSC.15b;<br/>ESDR.H1.NEUR.PROG;<br/>ESDR.H1.BMP4.TROP; ESDR.H1.MSC;<br/>STRM.MRW.MSC; MUS.SAT;<br/>SKIN.PEN.FRISK.FIB.02;<br/>SKIN.PEN.FRISK.MEL.01;</p>                                                                                                                                                                                                                                                                                                                                                                                                                                                                                                                                                                                                                                                                                                                                                                                      | <p><b>17_EnhW2</b><br/>(LNG.A549.<br/>ETOH002.C<br/>NCR)</p> <p><b>9_TxReg</b></p> | LNG.IMR90; ESC.WA7; ESC.I3;<br>ESC.HUES6; IPSC.20B;<br>IPSC.DF.19.11; ESDR.CD56.MESO;<br>ESDR.CD56.ECTO;<br>ESDR.H1.BMP4.TROP;<br>ESDR.H1.MSC;<br>BLD.PER.MONUC.PC;                                                                                                                                                                                                                                                                    | ESDR.H1.NEU<br>R.PROG;<br>ESDR.H1.MSC;<br>BLD.CD4.CD25<br>I.CD127.TME<br>MPC;<br>BLD.CD4.CD25<br>BLD.CD4.CD25                                                                                                                                                                                    | ESDR.H1.MSC;<br>BLD.PER.MONUC.PC;<br>BLD.CD3.PPC;<br>BLD.CD4.CD25I.CD127.TME<br>MPC;<br>BLD.CD4.CD25.CD127M.TRE<br>GPC; BLD.CD4.CD25M.TPC;                                                                                                                                         | LNG.IMR90;<br>ESDR.H1.NEUR.<br>PROG;<br>BLD.PER.MONU<br>C.PC;<br>BLD.CD4.NPC;<br>FAT.MSC.DR.AD                                                                        | <b>H3K4me1</b><br>LNG.A549<br>.ETOH002<br>.CNCR;<br>BLD.DND4<br>1.CNCR;<br>BLD.GM1 | <b>H3K4me<br/>3</b><br>BLD.DND<br>41.CNCR<br>;<br>MUS.HS<br>MMT; | DNase<br>ROADMAP<br><br>ENCODE<br>ESDR.H1.B<br>MP4.MESO |

|                                                                                                                                                                                                                                                                                                                                                                                                                                                                                                                                                                                                                                                                                                                                                                                                                                                                                                                                                                                                                                                                                                                                                                                                                                                                          |                                                                                                                                                                                                                                                                                                                                                                                                                 |                                                                                                                                                                                                                                                                                                                                                                                                                                                                                                                                                                                                                                                                                                                                                                                                                                                                                                                                                                                                                                                                                                                                                                                                                                                                                                       |                                                                                                                                                                                                                                                                                                                                                                                                                                                                                                                                                                                                                                                                                                                                                                                                                                                                                              |                                                                                                                                                                                                                                                                                                                                                                                                                                                                                                                                                                                                                                                                                                                                                                                                                            |                                                                                                                                                                                             |                                                                                                                                                                                                                                                                                                                                                                                                                                                                                                               |                                                                                                                                                |                                                                                                                                                            |
|--------------------------------------------------------------------------------------------------------------------------------------------------------------------------------------------------------------------------------------------------------------------------------------------------------------------------------------------------------------------------------------------------------------------------------------------------------------------------------------------------------------------------------------------------------------------------------------------------------------------------------------------------------------------------------------------------------------------------------------------------------------------------------------------------------------------------------------------------------------------------------------------------------------------------------------------------------------------------------------------------------------------------------------------------------------------------------------------------------------------------------------------------------------------------------------------------------------------------------------------------------------------------|-----------------------------------------------------------------------------------------------------------------------------------------------------------------------------------------------------------------------------------------------------------------------------------------------------------------------------------------------------------------------------------------------------------------|-------------------------------------------------------------------------------------------------------------------------------------------------------------------------------------------------------------------------------------------------------------------------------------------------------------------------------------------------------------------------------------------------------------------------------------------------------------------------------------------------------------------------------------------------------------------------------------------------------------------------------------------------------------------------------------------------------------------------------------------------------------------------------------------------------------------------------------------------------------------------------------------------------------------------------------------------------------------------------------------------------------------------------------------------------------------------------------------------------------------------------------------------------------------------------------------------------------------------------------------------------------------------------------------------------|----------------------------------------------------------------------------------------------------------------------------------------------------------------------------------------------------------------------------------------------------------------------------------------------------------------------------------------------------------------------------------------------------------------------------------------------------------------------------------------------------------------------------------------------------------------------------------------------------------------------------------------------------------------------------------------------------------------------------------------------------------------------------------------------------------------------------------------------------------------------------------------------|----------------------------------------------------------------------------------------------------------------------------------------------------------------------------------------------------------------------------------------------------------------------------------------------------------------------------------------------------------------------------------------------------------------------------------------------------------------------------------------------------------------------------------------------------------------------------------------------------------------------------------------------------------------------------------------------------------------------------------------------------------------------------------------------------------------------------|---------------------------------------------------------------------------------------------------------------------------------------------------------------------------------------------|---------------------------------------------------------------------------------------------------------------------------------------------------------------------------------------------------------------------------------------------------------------------------------------------------------------------------------------------------------------------------------------------------------------------------------------------------------------------------------------------------------------|------------------------------------------------------------------------------------------------------------------------------------------------|------------------------------------------------------------------------------------------------------------------------------------------------------------|
| <p>SKIN.PEN.FRSK.MEL.03;<br/>SKIN.PEN.FRSK.KER.02;<br/>SKIN.PEN.FRSK.KER.03; <b>BRST.HMEC.35</b>;<br/><b>BRST.MYO</b>; BRN.SUB.NIG;<br/>BRN.ANT.CAUD; BRN.CING.GYR;<br/>BRN.INF.TMP; BRN.ANG.GYR;<br/>BRN.FET.M; MUS.PSOAS;<br/>MUS.TRNK.FET; VAS.AOR;<br/>GI.RECT.SM.MUS; GI.STMC.FET;<br/>PLCNT.AMN; KID.FET; LNG.FET; OVRY;<br/>PANC.ISLT)</p> <p><b>19_DNase</b></p> <p>(ESC.WA7; ESC.I3; ESC.HUES6; IPSC.18;<br/>ESDR.H9.NEUR.PROG;<br/>ESDR.CD184.ENDO)</p> <p><b>10_TxEnh5</b><br/>(BLD.PER.MONUC.PC;<br/>BLD.CD4.CD251.CD127.TMEMPC;<br/>BLD.CD3.CPC; BLD.CD4.CD25M.TPC;<br/>BLD.CD4.CD25M.CD45RA.NPC;<br/>BLD.CD4.CD25M.CD45RO.MPC;<br/>BLD.CD4.NPC; BLD.CD8.NPC;<br/>BLD.CD34.PC; BLD.CD19.PPC; THYM;<br/>BRN.HIPP.MID; GI.DUO.SM.MUS;<br/>GI.S.INT.FET)</p> <p><b>9_TxReg</b><br/>(BLD.CD3.PPC;<br/>BLD.CD4.CD25.CD127M.TREGPC;<br/>BLD.CD4.CD25M.IL17M.PL.TPC;<br/>BLD.CD4.CD25M.IL17P.PL.TPC;<br/>BLD.CD4.MPC; BLD.CD8.MPC;<br/>BLD.CD14.PC; BLD.CD19.CPC;<br/>BLD.MOB.CD34.PC.M;<br/>BLD.MOB.CD34.PC.F; BLD.CD34.CC;<br/>BLD.CD56.PC; BLD.CD15.PC; THYM.FET;<br/>GI.DUO.MUC; ; SPLN)</p> <p><b>15_EnhAF</b><br/>(STRM.CHON.MRW.DR.MSC;<br/>FAT.ADIP.DR.MSC; FAT.MSC.DR.ADIP;<br/>SKIN.PEN.FRSK.FIB.01; MUS.SKLT.F;<br/>MUS.SKLT.M; HRT.FET; HRT.ATR.R;</p> | <p>(BLD.DND4<br/>1.CNCR;<br/>BLD.CD14.<br/>MONO)</p> <p><b>10_TxEnh5</b><br/>(BLD.GM12<br/>878)</p> <p><b>15_EnhAF</b><br/>CRVX.HEL<br/>S3.CNCR;<br/>LIV.HEPG2.<br/>CNCR;<br/>MUS.HSM<br/>MT;<br/>BLD.K562.C<br/>NCR;<br/>BRN.NHA;</p> <p><b>17_EnhW2</b><br/>(<b>BRST.HME</b><br/><b>C</b>;<br/>MUS.HSM<br/>M;<br/>VAS.HUVEC<br/>;<br/>SKIN.NHDF<br/>AD;<br/>SKIN.NHEK;<br/>LNG.NHLF;<br/>BONE.OSTE<br/>O)</p> | <p>BLD.CD3.PPC;<br/>BLD.CD4.CD251.CD127.TMEMPC;<br/>BLD.CD3.CPC;<br/>BLD.CD4.CD25.CD127M.TREGPC;<br/>BLD.CD4.CD25M.TPC;<br/>BLD.CD4.CD25M.CD45RA.NPC;<br/>BLD.CD4.CD25M.IL17M.PL.TPC;<br/>BLD.CD4.CD25M.IL17P.PL.TPC;<br/>BLD.CD4.CD25M.CD45RO.MPC;<br/>BLD.CD4.MPC; BLD.CD8.MPC;<br/>BLD.CD14.PC; BLD.CD19.CPC;<br/>BLD.CD34.PC;<br/>BLD.MOB.CD34.PC.M;<br/>BLD.MOB.CD34.PC.F;<br/>BLD.CD34.CC; BLD.CD19.PPC;<br/>BLD.CD56.PC; BLD.CD15.PC;<br/>STRM.MRW.MSC;<br/>STRM.CHON.MRW.DR.MSC;<br/>FAT.ADIP.DR.MSC;<br/>FAT.MSC.DR.ADIP;<br/>SKIN.PEN.FRSK.FIB.01;<br/>SKIN.PEN.FRSK.FIB.02;<br/>SKIN.PEN.FRSK.KER.02;<br/>SKIN.PEN.FRSK.KER.03;<br/><b>BRST.HMEC.35</b>; <b>BRST.MYO</b>;<br/>THYM; THYM.FET; BRN.HIPP.MID;<br/>BRN.SUB.NIG; BRN.ANT.CAUD;<br/>BRN.CING.GYR; BRN.INF.TMP;<br/>BRN.DL.PRFRTNL.CRTX;<br/>FAT.ADIP.NUC; MUS.PSOAS;<br/>MUS.SKLT.F; MUS.SKLT.M;<br/>MUS.TRNK.FET; MUS.LEG.FET;<br/>HRT.FET; HRT.ATR.R; HRT.VENT.L;<br/>HRT.VNT.R; GI.DUO.SM.MUS;<br/>GI.CLN.SM.MUS;<br/>GI.RECT.SM.MUS; GI.STMC.MUS;<br/>GI.STMC.FET; GI.S.INT.FET;<br/>GI.L.INT.FET; GI.S.INT; GI.CLN.SIG;<br/>GI.CLN.MUC; GI.RECT.MUC.29;<br/>GI.RECT.MUC.31; GI.STMC.MUC;<br/>GI.DUO.MUC; GI.ESO;<br/>GI.STMC.GAST; PLCNT.AMN;<br/>LNG.FET; ADRL.GLND.FET;<br/>PLCNT.FET; LIV.ADLT; PANC; LNG;<br/>SPLN</p> | <p>.CD127M.TRE<br/>GPC;<br/>BLD.CD4.CD25<br/>M.CD45RA.NP<br/>C;<br/>BLD.CD4.CD25<br/>M.IL17M.PL.T<br/>PC;<br/>BLD.CD4.CD25<br/>M.IL17P.PL.TP<br/>C;<br/>BLD.CD4.CD25<br/>M.CD45RO.M<br/>PC;<br/>BLD.CD4.MPC;<br/>BLD.CD8.MPC;<br/>BLD.CD4.NPC;<br/>BLD.CD8.MPC;<br/>BLD.CD8.NPC; BLD.CD14.PC;<br/>BLD.MOB.CD34.PC.F;<br/>BLD.CD19.PPC;<br/>BLD.CD56.PC;<br/>STRM.MRW.MSC;<br/>SKIN.PEN.FRSK.FIB.01;<br/>SKIN.PEN.FRSK.FIB.02;<br/>SKIN.PEN.FRSK.KER.03;<br/>THYM; THYM.FET;<br/>BRN.HIPP.MID;<br/>BRN.SUB.NIG;<br/>BRN.CING.GYR;<br/>BRN.INF.TMP;<br/>FAT.ADIP.NUC; MUS.PSOAS;<br/>MUS.SKLT.F; HRT.ATR.R;<br/>HRT.VENT.L; HRT.VNT.R;<br/>GI.DUO.SM.MUS;<br/>GI.RECT.SM.MUS;<br/>GI.STMC.MUS;<br/>GI.STMC.FET; GI.S.INT.FET;<br/>GI.L.INT.FET; GI.S.INT;<br/>GI.CLN.SIG; GI.CLN.MUC;<br/>GI.RECT.MUC.29;<br/>GI.RECT.MUC.31; GI.ESO;<br/>GI.STMC.GAST; PLCNT.FET;<br/>LIV.ADLT; LNG; SPLN</p> | <p>BLD.CD4.CD25M.CD45RA.N<br/>PC;<br/>BLD.CD4.CD25M.IL17M.PL.T<br/>PC;<br/>BLD.CD4.CD25M.IL17P.PL.T<br/>PC;<br/>BLD.CD4.CD25M.CD45RO.M<br/>PC; BLD.CD4.MPC;<br/>BLD.CD8.MPC;<br/>BLD.CD4.NPC;<br/>BLD.CD8.NPC; BLD.CD14.PC;<br/>BLD.MOB.CD34.PC.F;<br/>BLD.CD19.PPC;<br/>BLD.CD56.PC;<br/>STRM.MRW.MSC;<br/>SKIN.PEN.FRSK.FIB.01;<br/>SKIN.PEN.FRSK.FIB.02;<br/>SKIN.PEN.FRSK.KER.03;<br/>THYM; THYM.FET;<br/>BRN.HIPP.MID;<br/>BRN.SUB.NIG;<br/>BRN.CING.GYR;<br/>BRN.INF.TMP;<br/>FAT.ADIP.NUC; MUS.PSOAS;<br/>MUS.SKLT.F; HRT.ATR.R;<br/>HRT.VENT.L; HRT.VNT.R;<br/>GI.DUO.SM.MUS;<br/>GI.RECT.SM.MUS;<br/>GI.STMC.MUS;<br/>GI.STMC.FET; GI.S.INT.FET;<br/>GI.L.INT.FET; GI.S.INT;<br/>GI.CLN.SIG; GI.CLN.MUC;<br/>GI.RECT.MUC.29;<br/>GI.RECT.MUC.31; GI.ESO;<br/>GI.STMC.GAST; PLCNT.FET;<br/>LIV.ADLT; LNG; SPLN</p> | <p>IP;<br/>FAT.ADIP.NUC;<br/>MUS.SKLT.M;<br/>HRT.FET;<br/>GI.STMC.MUS;<br/>GI.CLN.MUC;<br/>GI.RECT.MUC.2<br/>9;<br/>GI.RECT.MUC.3<br/>1;<br/>GI.STMC.MUC;<br/>GI.DUO.MUC;<br/>LIV.ADLT.</p> | <p>2878;<br/>CRVX.HEL<br/>AS3.CNCR<br/>;<br/>LIV.HEPG2<br/>.CNCR;<br/><b>BRST.HME</b><br/><b>C</b>;<br/>MUS.HSM<br/>M;<br/>MUS.HSM<br/>MT;<br/>BLD.K562.<br/>CNCR;<br/>BLD.CD14.<br/>MONO;<br/>BRN.NHA;<br/>SKIN.NHD<br/>FAD;<br/>SKIN.NHE<br/>K;<br/>LNG.NHLF<br/>;<br/>BONE.OST<br/>EO</p> <p><b>H3K27ac</b><br/>BLD.DND4<br/>1.CNCR;<br/>BLD.GM1<br/>2878;<br/>CRVX.HEL<br/>AS3.CNCR<br/>;<br/>MUS.HSM<br/>MT;<br/>BLD.K562.<br/>CNCR;<br/>BLD.CD14.<br/>MONO;<br/>SKIN.NHE<br/>K;<br/>BONE.OST<br/>EO</p> | <p>BLD.CD1<br/>4.MONO</p> <p><b>H3K9ac</b><br/>BLD.DND<br/>41.CNCR<br/>;<br/>BLD.CD1<br/>4.MONO<br/>;<br/>BRN.NH<br/>A;<br/>LNG.NHL<br/>F.</p> | <p>;<br/>BLD.CD3.PP<br/>C;<br/>BLD.CD14.P<br/>C;<br/>LNG.A549.E<br/>TOH002.CN<br/>CR;<br/>BLD.GM12<br/>878;<br/>MUS.HSM<br/>MT;<br/>BLD.CD14.<br/>MONO</p> |
|--------------------------------------------------------------------------------------------------------------------------------------------------------------------------------------------------------------------------------------------------------------------------------------------------------------------------------------------------------------------------------------------------------------------------------------------------------------------------------------------------------------------------------------------------------------------------------------------------------------------------------------------------------------------------------------------------------------------------------------------------------------------------------------------------------------------------------------------------------------------------------------------------------------------------------------------------------------------------------------------------------------------------------------------------------------------------------------------------------------------------------------------------------------------------------------------------------------------------------------------------------------------------|-----------------------------------------------------------------------------------------------------------------------------------------------------------------------------------------------------------------------------------------------------------------------------------------------------------------------------------------------------------------------------------------------------------------|-------------------------------------------------------------------------------------------------------------------------------------------------------------------------------------------------------------------------------------------------------------------------------------------------------------------------------------------------------------------------------------------------------------------------------------------------------------------------------------------------------------------------------------------------------------------------------------------------------------------------------------------------------------------------------------------------------------------------------------------------------------------------------------------------------------------------------------------------------------------------------------------------------------------------------------------------------------------------------------------------------------------------------------------------------------------------------------------------------------------------------------------------------------------------------------------------------------------------------------------------------------------------------------------------------|----------------------------------------------------------------------------------------------------------------------------------------------------------------------------------------------------------------------------------------------------------------------------------------------------------------------------------------------------------------------------------------------------------------------------------------------------------------------------------------------------------------------------------------------------------------------------------------------------------------------------------------------------------------------------------------------------------------------------------------------------------------------------------------------------------------------------------------------------------------------------------------------|----------------------------------------------------------------------------------------------------------------------------------------------------------------------------------------------------------------------------------------------------------------------------------------------------------------------------------------------------------------------------------------------------------------------------------------------------------------------------------------------------------------------------------------------------------------------------------------------------------------------------------------------------------------------------------------------------------------------------------------------------------------------------------------------------------------------------|---------------------------------------------------------------------------------------------------------------------------------------------------------------------------------------------|---------------------------------------------------------------------------------------------------------------------------------------------------------------------------------------------------------------------------------------------------------------------------------------------------------------------------------------------------------------------------------------------------------------------------------------------------------------------------------------------------------------|------------------------------------------------------------------------------------------------------------------------------------------------|------------------------------------------------------------------------------------------------------------------------------------------------------------|

|               |                                                                                                                                                                                                                                                                                                                                                                                                                                                                                                                                                                                                                                                                                                                                                                                                                                                                                          |                                                                                                                                                                                                                                                                                 |                                                                                                                                                                                                                                                                                                                                                                                                                                                                                                                                                                                                                                                                                                                                                                                                                                    |                                                                                                                                                                                                                                                                                                                                                                                                                            |                                                                                                                                                                                                                                                                                                                                                                                                                                                                                                                                                                                                                                                                  |                                                                                                                                                                                                                                                                                                               |                                                                                                                                                                                                                                                                                                                                                         |                                                                                                                                      |  |
|---------------|------------------------------------------------------------------------------------------------------------------------------------------------------------------------------------------------------------------------------------------------------------------------------------------------------------------------------------------------------------------------------------------------------------------------------------------------------------------------------------------------------------------------------------------------------------------------------------------------------------------------------------------------------------------------------------------------------------------------------------------------------------------------------------------------------------------------------------------------------------------------------------------|---------------------------------------------------------------------------------------------------------------------------------------------------------------------------------------------------------------------------------------------------------------------------------|------------------------------------------------------------------------------------------------------------------------------------------------------------------------------------------------------------------------------------------------------------------------------------------------------------------------------------------------------------------------------------------------------------------------------------------------------------------------------------------------------------------------------------------------------------------------------------------------------------------------------------------------------------------------------------------------------------------------------------------------------------------------------------------------------------------------------------|----------------------------------------------------------------------------------------------------------------------------------------------------------------------------------------------------------------------------------------------------------------------------------------------------------------------------------------------------------------------------------------------------------------------------|------------------------------------------------------------------------------------------------------------------------------------------------------------------------------------------------------------------------------------------------------------------------------------------------------------------------------------------------------------------------------------------------------------------------------------------------------------------------------------------------------------------------------------------------------------------------------------------------------------------------------------------------------------------|---------------------------------------------------------------------------------------------------------------------------------------------------------------------------------------------------------------------------------------------------------------------------------------------------------------|---------------------------------------------------------------------------------------------------------------------------------------------------------------------------------------------------------------------------------------------------------------------------------------------------------------------------------------------------------|--------------------------------------------------------------------------------------------------------------------------------------|--|
|               | <p>HRT.VENT.L; HRT.VNT.R;<br/>GI.CLN.SM.MUS; GI.L.INT.FET; GI.S.INT;<br/>GI.CLN.SIG; GI.RECT.MUC.29;<br/>GI.RECT.MUC.31; GI.ESO; GI.STMC.GAST,<br/>PLCNT.FET; PANC; LNG)</p> <p><b>11_TxEnh3</b><br/>(BRN.DL.PRFRTL.CRTX; MUS.LEG.FET;<br/>GI.STMC.MUS; ADRL.GLND.FET)</p> <p><b>14_EnhA2</b><br/>(FAT.ADIP.NUC; GI.CLN.MUC;<br/>GI.STMC.MUC)</p> <p><b>13_EnhA1</b><br/>(LIV.ADLT)</p>                                                                                                                                                                                                                                                                                                                                                                                                                                                                                                  |                                                                                                                                                                                                                                                                                 |                                                                                                                                                                                                                                                                                                                                                                                                                                                                                                                                                                                                                                                                                                                                                                                                                                    |                                                                                                                                                                                                                                                                                                                                                                                                                            |                                                                                                                                                                                                                                                                                                                                                                                                                                                                                                                                                                                                                                                                  |                                                                                                                                                                                                                                                                                                               |                                                                                                                                                                                                                                                                                                                                                         |                                                                                                                                      |  |
| rs2706<br>396 | <p><b>12_TxEnhW</b><br/>(BLD.PER.MONUC.PC; BLD.CD3.CPC;<br/>THYM; BRN.HIPP.MID)</p> <p><b>9_TxReg</b><br/>(BLD.CD3.PPC; BLD.CD56.PC;<br/>BLD.CD15.PC; GI.DUO.MUC; LIV.ADLT)</p> <p><b>10_TxEnh5</b><br/>(BLD.CD4.CD25I.CD127.TMEMPC;<br/>BLD.CD4.CD25.CD127M.TREGPC;<br/>BLD.CD4.CD25M.TPC;<br/>BLD.CD4.CD25M.CD45RA.NPC;<br/>BLD.CD4.CD25M.IL17M.PL.TPC;<br/>BLD.CD4.CD25M.IL17P.PL.TPC;<br/>BLD.CD4.CD25M.CD45RO.MPC;<br/>BLD.CD4.MPC; BLD.CD8.MPC;<br/>BLD.CD4.NPC; BLD.CD8.NPC;<br/>BLD.CD14.PC; BLD.CD19.CPC;<br/>BLD.CD34.PC; BLD.MOB.CD34.PC.M;<br/>BLD.MOB.CD34.PC.F; BLD.CD34.CC;<br/>BLD.CD19.PPC; THYM.FET;<br/>GI.DUO.SM.MUS; GI.S.INT.FET; GI.S.INT;<br/>GI.RECT.MUC.29)</p> <p><b>17_EmhW2</b><br/><b>BRST.MYO</b>; BRN.SUB.NIG;<br/>BRN.ANT.CAUD; BRN.CING.GYR;<br/>BRN.INF.TMP; MUS.SKLT.F;<br/>MUS.SKLT.M; MUS.LEG.FET; HRT.VNT.R;<br/>GI.RECT.SM.MUS; GI.STMC.MUS;</p> | <p><b>13_EnhA1</b><br/>(BLD.DND4<br/>1.CNCR)</p> <p><b>10_TxEnh<br/>W2</b><br/>(BLD.GM12<br/>878)</p> <p><b>17_EnhW2</b><br/>(CRVX.HEL<br/>S3.CNCR;<br/>BLD.K562.C<br/>NCR)</p> <p><b>15_EnhAF</b><br/>(LIV.HEPG2.<br/>CNCR)</p> <p><b>9_TxReg</b><br/>(BLD.CD14.<br/>MONO)</p> | <p>LNG.IMR90; IPSC.DF.19.11;<br/>ESDR.CD56.MESO;<br/>ESDR.CD56.ECTO;<br/>ESDR.H1.BMP4.TROP;<br/>ESDR.H1.MSC;<br/>BLD.PER.MONUC.PC;<br/>BLD.CD3.PPC;<br/>BLD.CD4.CD25I.CD127.TMEMPC;<br/>BLD.CD3.CPC;<br/>BLD.CD4.CD25.CD127M.TREGPC;<br/>BLD.CD4.CD25M.TPC;<br/>BLD.CD4.CD25M.CD45RA.NPC;<br/>BLD.CD4.CD25M.IL17M.PL.TPC;<br/>BLD.CD4.CD25M.IL17P.PL.TPC;<br/>BLD.CD4.CD25M.CD45RO.MPC;<br/>BLD.CD4.MPC; BLD.CD8.MPC;<br/>BLD.CD4.NPC; BLD.CD8.NPC;<br/>BLD.CD14.PC; BLD.CD19.CPC;<br/>BLD.CD34.PC;<br/>BLD.MOB.CD34.PC.M;<br/>BLD.MOB.CD34.PC.F;<br/>BLD.CD34.CC; BLD.CD19.PPC;<br/>BLD.CD56.PC; BLD.CD15.PC;<br/>STRM.MRW.MSC;<br/>SKIN.PEN.FRSK.FIB.01;<br/>SKIN.PEN.FRSK.FIB.02;<br/>SKIN.PEN.FRSK.KER.03;<br/><b>BRST.MYO</b>;<br/>BRN.GANGEM.DR.NRSPHR;<br/>THYM; THYM.FET; BRN.HIPP.MID;<br/>BRN.SUB.NIG; BRN.ANT.CAUD;</p> | <p>BLD.CD4.CD25<br/>I.CD127.TME<br/>MPC;<br/>BLD.CD4.CD25<br/>M.IL17P.PL.TP<br/>C;<br/>BLD.CD4.CD25<br/>M.CD45RO.M<br/>PC;<br/>BLD.CD4.MPC;<br/>BLD.CD8.MPC;<br/>BLD.MOB.CD3<br/>4.PC.M;<br/>BLD.MOB.CD3<br/>4.PC.F;<br/>BLD.CD15.PC;<br/>GI.DUO.SM.M<br/>US;<br/>GI.CLN.SM.M<br/>US;<br/>GI.RECT.SM.M<br/>US;<br/>GI.STMC.MUS;<br/>GI.RECT.MUC.<br/>29;<br/>GI.STMC.MUC<br/>;<br/>GI.DUO.MUC;<br/>LIV.ADLT;<br/>PANC.</p> | <p>ESDR.H1.MSC;<br/>BLD.PER.MONUC.PC;<br/>BLD.CD3.PPC;<br/>BLD.CD4.CD25I.CD127.TME<br/>MPC;<br/>BLD.CD4.CD25.CD127M.TRE<br/>GPC; BLD.CD4.CD25M.TPC;<br/>BLD.CD4.CD25M.CD45RA.N<br/>PC;<br/>BLD.CD4.CD25M.IL17M.PL.T<br/>PC;<br/>BLD.CD4.CD25M.IL17P.PL.T<br/>PC;<br/>BLD.CD4.CD25M.CD45RO.M<br/>PC; BLD.CD4.MPC;<br/>BLD.CD8.MPC;<br/>BLD.CD4.NPC;<br/>BLD.CD8.NPC; BLD.CD14.PC;<br/>BLD.MOB.CD34.PC.F;<br/>BLD.CD19.PPC;<br/>BLD.CD56.PC;<br/>SKIN.PEN.FRSK.FIB.01;<br/>THYM; THYM.FET;<br/>BRN.HIPP.MID;<br/>BRN.ANT.CAUD;<br/>BRN.CING.GYR;<br/>FAT.ADIP.NUC; MUS.PSOAS;<br/>MUS.SKLT.F; HRT.ATR.R;<br/>HRT.VNT.R;<br/>GI.DUO.SM.MUS;<br/>GI.RECT.SM.MUS;</p> | <p>ESDR.H1.NEUR.<br/>PROG;<br/>BLD.PER.MONU<br/>C.PC;<br/>BLD.CD4.NPC;<br/>BRN.ANG.GYR;<br/>FAT.ADIP.NUC;<br/>MUS.SKLT.M;<br/>HRT.FET;<br/>GI.CLN.SM.MUS<br/>; GI.STMC.MUS;<br/>GI.CLN.MUC;<br/>GI.RECT.MUC.2<br/>9;<br/>GI.RECT.MUC.3<br/>1;<br/>GI.STMC.MUC;<br/>GI.DUO.MUC;<br/>LNG.FET;<br/>LIV.ADLT.</p> | <p><b>H3K4me1</b><br/>LNG.A549<br/>.ETOH002<br/>.CNCR;<br/>BLD.DND4<br/>1.CNCR;<br/>BLD.GM1<br/>2878;<br/>CRVX.HEL<br/>AS3.CNCR<br/>;<br/>LIV.HEPG2<br/>.CNCR;<br/><b>BRST.HME<br/>C</b>;<br/>MUS.HSM<br/>MT;<br/>BLD.CD14.<br/>MONO;<br/>LNG.NHLF<br/>.</p> <p><b>H3K27ac</b><br/>BLD.DND4<br/>1.CNCR;<br/>BLD.CD14.<br/>MONO;<br/>BONE.OST<br/>EO</p> | <p><b>H3K4me<br/>3</b><br/>BLD.CD1<br/>4.MONO<br/>.<br/><b>H3K9ac</b><br/>BLD.DND<br/>41.CNCR<br/>;<br/>BLD.CD1<br/>4.MONO<br/>.</p> |  |

|           |                                                                                                                                                                                                                                                                                                                                                                                                                                                                                                                                                                                                                                                                                                                                                                                                                                                                                              |                                                                                                                                                                                                                          |                                                                                                                                                                                                                                                                                                                                                                                                                                                                                                                                                                                                                                                                                                                                                                                                                            |                                                                                                                                                                                                                                                                                                                                                                         |                                                                                                                                                                                                                                                                                                                                                                                                                                                                                                                                                                                        |                                                                                                                                                                                                                                                                                |                                                                                                                                                                                                                |                                                                                                                                                                                                        |  |
|-----------|----------------------------------------------------------------------------------------------------------------------------------------------------------------------------------------------------------------------------------------------------------------------------------------------------------------------------------------------------------------------------------------------------------------------------------------------------------------------------------------------------------------------------------------------------------------------------------------------------------------------------------------------------------------------------------------------------------------------------------------------------------------------------------------------------------------------------------------------------------------------------------------------|--------------------------------------------------------------------------------------------------------------------------------------------------------------------------------------------------------------------------|----------------------------------------------------------------------------------------------------------------------------------------------------------------------------------------------------------------------------------------------------------------------------------------------------------------------------------------------------------------------------------------------------------------------------------------------------------------------------------------------------------------------------------------------------------------------------------------------------------------------------------------------------------------------------------------------------------------------------------------------------------------------------------------------------------------------------|-------------------------------------------------------------------------------------------------------------------------------------------------------------------------------------------------------------------------------------------------------------------------------------------------------------------------------------------------------------------------|----------------------------------------------------------------------------------------------------------------------------------------------------------------------------------------------------------------------------------------------------------------------------------------------------------------------------------------------------------------------------------------------------------------------------------------------------------------------------------------------------------------------------------------------------------------------------------------|--------------------------------------------------------------------------------------------------------------------------------------------------------------------------------------------------------------------------------------------------------------------------------|----------------------------------------------------------------------------------------------------------------------------------------------------------------------------------------------------------------|--------------------------------------------------------------------------------------------------------------------------------------------------------------------------------------------------------|--|
|           | <p>GI.CLN.MUC; GI.ESO; GI.STMC.GAST; KID.FET; LNG.FET; ADRL.GLND.FET; PANC; LNG; SPLN)</p> <p><b>15_EnhAF</b><br/>(FAT.ADIP.NUC; GI.CLN.SM.MUS; GI.L.INT.FET; GI.CLN.SIG; GI.RECT.MUC.31; GI.STMC.MUC)</p> <p><b>11_TxEnh3</b><br/>(GI.STMC.FET; PLCNT.FET)</p>                                                                                                                                                                                                                                                                                                                                                                                                                                                                                                                                                                                                                              |                                                                                                                                                                                                                          | <p>BRN.CING.GYR;<br/>BRN.DL.PRFRTNL.CRTX;<br/>FAT.ADIP.NUC; MUS.SKLT.F;<br/>MUS.SKLT.M; MUS.TRNK.FET;<br/>MUS.LEG.FET; HRT.FET;<br/>HRT.ATR.R; HRT.VENT.L;<br/>HRT.VNT.R; GI.DUO.SM.MUS;<br/>GI.CLN.SM.MUS;<br/>GI.RECT.SM.MUS; GI.STMC.MUS;<br/>GI.STMC.FET; GI.S.INT.FET;<br/>GI.L.INT.FET; GI.S.INT; GI.CLN.SIG;<br/>GI.CLN.MUC; GI.RECT.MUC.29;<br/>GI.RECT.MUC.31; GI.STMC.MUC;<br/>GI.DUO.MUC; GI.ESO;<br/>GI.STMC.GAST; LNG.FET;<br/>ADRL.GLND.FET; PLCNT.FET;<br/>LIV.ADLT; PANC; LNG; SPLN</p>                                                                                                                                                                                                                                                                                                                    |                                                                                                                                                                                                                                                                                                                                                                         | <p>GI.STMC.MUS;<br/>GI.STMC.FET; GI.S.INT.FET;<br/>GI.L.INT.FET; GI.S.INT;<br/>GI.CLN.SIG; GI.CLN.MUC;<br/>GI.RECT.MUC.29;<br/>GI.RECT.MUC.31; GI.ESO;<br/>GI.STMC.GAST; PLCNT.FET;<br/>LIV.ADLT; LNG.</p>                                                                                                                                                                                                                                                                                                                                                                             |                                                                                                                                                                                                                                                                                |                                                                                                                                                                                                                |                                                                                                                                                                                                        |  |
| rs2522052 | <p><b>17_EnhW2</b><br/>(ESDR.H1.BMP4.TROP;<br/>SKIN.PEN.FRSK.FIB.02;<br/>SKIN.PEN.FRSK.MEL.01; <b>BRST.MYO</b>;<br/>BRN.CRTX.DR.NRSPHR; BRN.SUB.NIG;<br/>BRN.ANT.CAUD; BRN.CING.GYR;<br/>BRN.INF.TMP; BRN.ANG.GYR;<br/>BRN.DL.PRFRTNL.CRTX;<br/>BRN.GRM.MTRX; BRN.FET.M;<br/>MUS.PSOAS; HRT.ATR.R;<br/>GI.RECT.SM.MUS; GI.ESO; PLCNT.AMN;<br/>KID.FET; LNG.FET; OVRY; PANC.ISLT)</p> <p><b>10_TxEnh5</b><br/>(BLD.PER.MONUC.PC; BLD.CD3.PPC;<br/>BLD.CD4.CD25I.CD127.TMEMPC;<br/>BLD.CD4.CD25.CD127M.TREGPC;<br/>BLD.CD4.CD25M.TPC;<br/>BLD.CD4.CD25M.CD45RA.NPC;<br/>BLD.CD4.CD25M.IL17M.PL.TPC;<br/>BLD.CD4.CD25M.IL17P.PL.TPC;<br/>BLD.CD4.CD25M.CD45RO.MPC;<br/>BLD.CD4.MPC; BLD.CD8.MPC;<br/>BLD.CD4.NPC; BLD.CD8.NPC;<br/>BLD.CD14.PC; BLD.CD19.CPC;<br/>BLD.CD34.PC; BLD.CD19.PPC;<br/>BLD.CD56.PC; THYM; THYM.FET;<br/>MUS.LEG.FET; HRT.VNT.R;<br/>GI.DUO.SM.MUS; GI.CLN.SM.MUS;</p> | <p><b>9_TxReg</b><br/>(BLD.DND41.CNCR)</p> <p><b>10_TxEnh5</b><br/>(BLD.GM12878)</p> <p><b>15_EnhAF</b><br/>(LIV.HEPG2.CNCR)</p> <p><b>15_EnhAF</b><br/>(BLD.K562.CNCR)</p> <p><b>10_TxEnhAF</b><br/>(BLD.CD14.MONO)</p> | <p>ESC.4STAR; IPSC.20B; IPSC.15b;<br/>IPSC.DF.19.11; ESDR.CD56.ECTO;<br/>ESDR.H1.MSC;<br/>BLD.PER.MONUC.PC;<br/>BLD.CD3.PPC;<br/>BLD.CD4.CD25I.CD127.TMEMPC;<br/>BLD.CD3.CPC;<br/>BLD.CD4.CD25.CD127M.TREGPC;<br/>BLD.CD4.CD25M.TPC;<br/>BLD.CD4.CD25M.CD45RA.NPC;<br/>BLD.CD4.CD25M.IL17M.PL.TPC;<br/>BLD.CD4.CD25M.IL17P.PL.TPC;<br/>BLD.CD4.CD25M.CD45RO.MPC;<br/>BLD.CD4.MPC; BLD.CD8.MPC;<br/>BLD.CD4.NPC; BLD.CD8.NPC;<br/>BLD.CD14.PC; BLD.CD19.CPC;<br/>BLD.CD34.PC;<br/>BLD.MOB.CD34.PC.M;<br/>BLD.MOB.CD34.PC.F;<br/>BLD.CD34.CC; BLD.CD19.PPC;<br/>BLD.CD56.PC; BLD.CD15.PC;<br/>SKIN.PEN.FRSK.FIB.02;<br/><b>BRST.MYO</b>; THYM; THYM.FET;<br/>BRN.HIPP.MID; BRN.SUB.NIG;<br/>BRN.ANT.CAUD; BRN.INF.TMP;<br/>BRN.ANG.GYR;<br/>BRN.DL.PRFRTNL.CRTX;<br/>BRN.FET.F; BRN.FET.M;<br/>FAT.ADIP.NUC; MUS.SKLT.F;</p> | <p>BLD.CD4.CD25I.CD127.TMEMPC;<br/>BLD.CD4.CD25.CD127M.TREGPC;<br/>BLD.CD4.CD25M.CD45RA.NPC;<br/>BLD.CD4.CD25M.IL17M.PL.TPC;<br/>BLD.CD4.CD25M.IL17P.PL.TPC;<br/>BLD.CD4.MPC;<br/>BLD.MOB.CD34.PC.F;<br/>BLD.CD15.PC;<br/>SKIN.PEN.FRSK.FIB.01;<br/>SKIN.PEN.FRSK.FIB.02;<br/>GI.DUO.SM.MUS;<br/>GI.CLN.SM.MUS;<br/>GI.RECT.SM.MUS;<br/>GI.CLN.MUC;<br/>GI.DUO.MUC;</p> | <p>BLD.PER.MONUC.PC;<br/>BLD.CD3.PPC;<br/>BLD.CD4.CD25I.CD127.TMEMPC;<br/>BLD.CD4.CD25.CD127M.TREGPC;<br/>BLD.CD4.CD25M.TPC;<br/>BLD.CD4.CD25M.CD45RA.NPC;<br/>BLD.CD4.CD25M.IL17M.PL.TPC;<br/>BLD.CD4.CD25M.IL17P.PL.TPC;<br/>BLD.CD4.CD25M.CD45RO.MPC;<br/>BLD.CD4.MPC;<br/>BLD.CD8.MPC;<br/>BLD.CD4.NPC;<br/>BLD.CD8.NPC;<br/>BLD.MOB.CD34.PC.F;<br/>BLD.CD19.PPC;<br/>BLD.CD56.PC;<br/>SKIN.PEN.FRSK.FIB.02;<br/>THYM; THYM.FET;<br/>BRN.HIPP.MID;<br/>BRN.SUB.NIG;<br/>BRN.ANT.CAUD;<br/>BRN.CING.GYR;<br/>BRN.INF.TMP;<br/>BRN.DL.PRFRTNL.CRTX;<br/>FAT.ADIP.NUC; MUS.PSOAS;</p> | <p>ESC.HUES6;<br/>BRN.SUB.NIG;<br/>BRN.ANT.CAUD;<br/>BRN.INF.TMP;<br/>BRN.ANG.GYR;<br/>FAT.ADIP.NUC;<br/>GI.CLN.SM.MUS;<br/>GI.RECT.SM.MUS;<br/>GI.CLN.MUC;<br/>GI.RECT.MUC.29;<br/>GI.RECT.MUC.31;<br/>GI.STMC.MUC;<br/>GI.ESO;<br/>LNG.FET;<br/>PANC.ISLT;<br/>LIV.ADLT.</p> | <p><b>H3K4me1</b><br/>BLD.DND41.CNCR;<br/>BLD.GM12878;<br/>LIV.HEPG2.CNCR;<br/>MUS.HSM.M;<br/>MUS.HSM.MT;<br/>BLD.CD14.MONO.</p> <p><b>H3K27ac</b><br/>BLD.DND41.CNCR;<br/>BLD.GM12878;<br/>BLD.CD14.MONO.</p> | <p><b>H3K4me3</b><br/>BLD.DND41.CNCR;<br/>BLD.K562.CNCR;<br/>BLD.CD14.MONO;<br/>BRN.NH.A;<br/>SKIN.NH.DFAD;<br/>SKIN.NH.EK;<br/>LNG.NHL.F;<br/>BONE.O.STEO</p> <p><b>H3K9ac</b><br/>BLD.DND41.CNCR</p> |  |



|               |                                                                                                                                                                                                                                                                                                                                                                                                                                                                                                                                                                                                                          |                                                                                                                                                                                                                                 |                                                                                                                                                                                                                                                                                                                                                                                                                                                                                                                                     |                                                                                                                                                                                                                                                                         |                                                                                                                                                                                                                                                                                                                                                                                             |                                                                                                                                                                                                                                                                                           |                                                                                                                                                                                                                       |                                                                                                                                                               |                                                                                                      |
|---------------|--------------------------------------------------------------------------------------------------------------------------------------------------------------------------------------------------------------------------------------------------------------------------------------------------------------------------------------------------------------------------------------------------------------------------------------------------------------------------------------------------------------------------------------------------------------------------------------------------------------------------|---------------------------------------------------------------------------------------------------------------------------------------------------------------------------------------------------------------------------------|-------------------------------------------------------------------------------------------------------------------------------------------------------------------------------------------------------------------------------------------------------------------------------------------------------------------------------------------------------------------------------------------------------------------------------------------------------------------------------------------------------------------------------------|-------------------------------------------------------------------------------------------------------------------------------------------------------------------------------------------------------------------------------------------------------------------------|---------------------------------------------------------------------------------------------------------------------------------------------------------------------------------------------------------------------------------------------------------------------------------------------------------------------------------------------------------------------------------------------|-------------------------------------------------------------------------------------------------------------------------------------------------------------------------------------------------------------------------------------------------------------------------------------------|-----------------------------------------------------------------------------------------------------------------------------------------------------------------------------------------------------------------------|---------------------------------------------------------------------------------------------------------------------------------------------------------------|------------------------------------------------------------------------------------------------------|
|               | <p>GI.STMC.FET; GI.CLN.SIG;<br/>GI.RECT.MUC.29; SPLN)</p> <p><b>12_TxEnhW</b><br/>(BLD.CD3.CPC; SKIN.PEN.FRSK.FIB.01;<br/>BRN.HIPP.MID; MUS.SKLT.M)</p> <p><b>9_TxReg</b><br/>(BLD.MOB.CD34.PC.M;<br/>BLD.MOB.CD34.PC.F; BLD.CD34.CC;<br/>BLD.CD15.PC; GI.S.INT.FET;<br/>GI.DUO.MUC)</p> <p><b>15_EnhW2</b><br/>(FAT.ADIP.NUC; MUS.SKLT.F;<br/>MUS.TRNK.FET; HRT.VENT.L; GI.S.INT;<br/>GI.RECT.MUC.31; GI.STMC.MUC;<br/>ADRL.GLND.FET; PANC; LNG)</p> <p><b>11_TxEnh3</b><br/>(GI.STMC.MUS; GI.STMC.GAST;<br/>PLCNT.FET)</p> <p><b>13_EnhA1</b><br/>(GI.L.INT.FET; LIV.ADLT)</p> <p><b>14_EnhA2</b><br/>(GI.CLN.MUC)</p> |                                                                                                                                                                                                                                 | <p>MUS.SKLT.M; MUS.TRNK.FET;<br/>MUS.LEG.FET; HRT.ATR.R;<br/>HRT.VENT.L; HRT.VNT.R;<br/>GI.DUO.SM.MUS;<br/>GI.CLN.SM.MUS;<br/>GI.RECT.SM.MUS; GI.STMC.MUS;<br/>GI.STMC.FET; GI.S.INT.FET;<br/>GI.L.INT.FET; GI.S.INT; GI.CLN.SIG;<br/>GI.CLN.MUC; GI.RECT.MUC.29;<br/>GI.RECT.MUC.31; GI.STMC.MUC;<br/>GI.DUO.MUC; GI.ESO;<br/>GI.STMC.GAST; KID.FET; LNG.FET;<br/>PANC.ISLT; PLCNT.FET; LIV.ADLT;<br/>PANC; LNG; SPLN</p>                                                                                                          | <p>LIV.ADLT;<br/>SPLN</p>                                                                                                                                                                                                                                               | <p>MUS.SKLT.F; MUS.LEG.FET;<br/>HRT.VENT.L; HRT.VNT.R;<br/>GI.DUO.SM.MUS;<br/>GI.CLN.SM.MUS;<br/>GI.STMC.MUS;<br/>GI.STMC.FET; GI.S.INT.FET;<br/>GI.L.INT.FET; GI.S.INT;<br/>GI.CLN.SIG; GI.CLN.MUC;<br/>GI.RECT.MUC.29;<br/>GI.RECT.MUC.31; GI.ESO;<br/>GI.STMC.GAST; PLCNT.FET;<br/>LIV.ADLT; LNG; SPLN</p>                                                                               |                                                                                                                                                                                                                                                                                           |                                                                                                                                                                                                                       |                                                                                                                                                               |                                                                                                      |
| rs2706<br>403 | <p><b>17_EnhW2</b><br/>(ESDR.H1.NEUR.PROG;<br/>ESDR.CD56.ECTO; ESDR.H1.BMP4.TROP;<br/>SKIN.PEN.FRSK.FIB.01;<br/>SKIN.PEN.FRSK.FIB.02;<br/>SKIN.PEN.FRSK.MEL.01;<br/>SKIN.PEN.FRSK.MEL.03; <b>BRST.MYO</b>;<br/>BRN.CRTX.DR.NRSPHR; BRN.SUB.NIG;<br/>BRN.ANT.CAUD; BRN.INF.TMP;<br/>BRN.ANG.GYR; BRN.DL.PRFRTNL.CRTX;<br/>BRN.GRM.MTRX; BRN.FET.M;<br/>MUS.PSOAS; HRT.FET; HRT.ATR.R;<br/>PLCNT.AMN; KID.FET; OVRY; PANC.ISLT;<br/>LNG)</p> <p><b>18_EnhAc</b><br/>(ESDR.H1.MSC;<br/>BRN.GANGEM.DR.NRSPHR;</p>                                                                                                            | <p><b>9_TxReg</b><br/>(BLD.DND4<br/>1.CNCR;<br/>BLD.CD14.<br/>MONO)</p> <p><b>10_TxEnh5</b><br/><br/>(BLD.GM12<br/>878)</p> <p><b>17_EnhW2</b><br/>(CRVX.HELA<br/>S3.CNCR)</p> <p><b>14_EnhW2</b><br/>(LIV.HEPG2.<br/>CNCR)</p> | <p>ESC.H1; ESC.4STAR; IPSC.20B;<br/>IPSC.15b; IPSC.DF.19.11;<br/>ESDR.CD56.MESO;<br/>ESDR.CD56.ECTO; ESDR.H1.MSC;<br/>BLD.PER.MONUC.PC;<br/>BLD.CD3.PPC;<br/>BLD.CD4.CD25I.CD127.TMEMPC;<br/>BLD.CD3.CPC;<br/>BLD.CD4.CD25.CD127M.TREGPC;<br/>BLD.CD4.CD25M.TPC;<br/>BLD.CD4.CD25M.CD45RA.NPC;<br/>BLD.CD4.CD25M.IL17M.PL.TPC;<br/>BLD.CD4.CD25M.IL17P.PL.TPC;<br/>BLD.CD4.CD25M.CD45RO.MPC;<br/>BLD.CD4.MPC; BLD.CD8.MPC;<br/>BLD.CD4.NPC; BLD.CD8.NPC;<br/>BLD.CD14.PC; BLD.CD19.CPC;<br/>BLD.CD34.PC;<br/>BLD.MOB.CD34.PC.M;</p> | <p>ESDR.CD56.EC<br/>TO;<br/>BLD.CD4.CD25<br/>I.CD127.TME<br/>MPC;<br/>BLD.CD4.CD25<br/>.CD127M.TRE<br/>GPC;<br/>BLD.CD4.CD25<br/>M.TPC;<br/>BLD.CD4.CD25<br/>M.IL17M.PL.T<br/>PC;<br/>BLD.CD4.CD25<br/>M.IL17P.PL.TP<br/>C;<br/>BLD.CD4.CD25<br/>M.CD45RO.M<br/>PC;</p> | <p>IPSC.20B;<br/>BLD.PER.MONUC.PC;<br/>BLD.CD3.PPC;<br/>BLD.CD4.CD25I.CD127.TME<br/>MPC;<br/>BLD.CD4.CD25.CD127M.TRE<br/>GPC; BLD.CD4.CD25M.TPC;<br/>BLD.CD4.CD25M.CD45RA.N<br/>PC;<br/>BLD.CD4.CD25M.IL17M.PL.T<br/>PC;<br/>BLD.CD4.CD25M.IL17P.PL.T<br/>PC;<br/>BLD.CD4.CD25M.CD45RO.M<br/>PC; BLD.CD4.MPC;<br/>BLD.CD8.MPC;<br/>BLD.CD4.NPC;<br/>BLD.CD8.NPC;<br/>BLD.MOB.CD34.PC.F;</p> | <p>ESC.HUES6;<br/>BLD.PER.MONU<br/>C.PC;<br/>BRN.SUB.NIG;<br/>BRN.ANT.CAUD<br/>;<br/>BRN.CING.GYR;<br/>BRN.INF.TMP;<br/>BRN.ANG.GYR;<br/>BRN.DL.PRFRT<br/>L.CRTX;<br/>FAT.ADIP.NUC;<br/>MUS.SKLT.F;<br/>MUS.SKLT.M;<br/>GI.CLN.SM.MUS<br/>;<br/>GI.RECT.SM.MU<br/>S;<br/>GI.STMC.MUS;</p> | <p><b>H3K4me1</b><br/>LNG.A549<br/>.ETOH002<br/>.CNCR;<br/>BLD.DND4<br/>1.CNCR;<br/>BLD.GM1<br/>2878;<br/>LIV.HEPG2<br/>.CNCR;<br/>MUS.HSM<br/>M;<br/>MUS.HSM<br/>MT;<br/>VAS.HUVE<br/>C;<br/>BLD.CD14.<br/>MONO.</p> | <p><b>H3K4me3</b><br/>BLD.DND<br/>41.CNCR<br/>;<br/>LIV.HEP<br/>G2.CNCR<br/>;<br/>BLD.CD1<br/>4.MONO<br/>.<br/><br/><b>H3K9ac</b><br/>BLD.DND<br/>41.CNCR</p> | <p>ROADMAP<br/>GI.S.INT.FE<br/>T;<br/>GI.L.INT.FE<br/>T; GI.S.INT;<br/><br/>ENCODE<br/><br/>NONE</p> |

|               |                                                                                                                                                                                                                                                                                                                                                                                                                                                                                                                                                                                                                                                                                                                                                                                                                                                                                                                                                                                                                                                                                                                      |                                                                          |                                                                                                                                                                                                                                                                                                                                                                                                                                                                                                                                                                                                                                                                                                                                                                                                                                                                                      |                                                                                                                                                                                                                                                                                                                                                                                                                                                                                                        |                                                                                                                                                                                                                                                                                                                                                                                                                                                                                                                                                                                                                            |                                                                                                                                                 |                                                                                                                                                         |                                                        |                                                                       |
|---------------|----------------------------------------------------------------------------------------------------------------------------------------------------------------------------------------------------------------------------------------------------------------------------------------------------------------------------------------------------------------------------------------------------------------------------------------------------------------------------------------------------------------------------------------------------------------------------------------------------------------------------------------------------------------------------------------------------------------------------------------------------------------------------------------------------------------------------------------------------------------------------------------------------------------------------------------------------------------------------------------------------------------------------------------------------------------------------------------------------------------------|--------------------------------------------------------------------------|--------------------------------------------------------------------------------------------------------------------------------------------------------------------------------------------------------------------------------------------------------------------------------------------------------------------------------------------------------------------------------------------------------------------------------------------------------------------------------------------------------------------------------------------------------------------------------------------------------------------------------------------------------------------------------------------------------------------------------------------------------------------------------------------------------------------------------------------------------------------------------------|--------------------------------------------------------------------------------------------------------------------------------------------------------------------------------------------------------------------------------------------------------------------------------------------------------------------------------------------------------------------------------------------------------------------------------------------------------------------------------------------------------|----------------------------------------------------------------------------------------------------------------------------------------------------------------------------------------------------------------------------------------------------------------------------------------------------------------------------------------------------------------------------------------------------------------------------------------------------------------------------------------------------------------------------------------------------------------------------------------------------------------------------|-------------------------------------------------------------------------------------------------------------------------------------------------|---------------------------------------------------------------------------------------------------------------------------------------------------------|--------------------------------------------------------|-----------------------------------------------------------------------|
|               | <p>10_TxEnh5<br/>BLD.PER.MONUC.PC; BLD.CD3.CPC;<br/>BLD.CD4.CD25.CD127M.TREGPC;<br/>BLD.CD4.CD25M.CD45RA.NPC;<br/>BLD.CD8.NPC; BLD.CD14.PC;<br/>BLD.CD34.PC; BLD.CD19.PPC; THYM;<br/>GI.DUO.SM.MUS; GI.CLN.SIG; SPLN)</p> <p><b>9_TxReg</b><br/>(BLD.CD3.PPC;<br/>BLD.CD4.CD251.CD127.TMEMPC;<br/>BLD.CD4.CD25M.TPC; GI.RECT.MUC.29;<br/>BLD.CD4.CD25M.IL17M.PL.TPC;<br/>BLD.CD4.CD25M.IL17P.PL.TPC;<br/>BLD.CD4.CD25M.CD45RO.MPC;<br/>BLD.CD4.MPC; BLD.CD8.MPC;<br/>BLD.CD4.NPC; BLD.CD19.CPC;<br/>BLD.MOB.CD34.PC.M;<br/>BLD.MOB.CD34.PC.F; BLD.CD34.CC;<br/>BLD.CD56.PC; BLD.CD15.PC; THYM.FET;<br/>GI.S.INT.FET; GI.DUO.MUC)</p> <p><b>15_EnhAF</b><br/>(BRN.HIPP.MID; BRN.CING.GYR;<br/>FAT.ADIP.NUC; MUS.SKLT.F;<br/>MUS.SKLT.M; MUS.TRNK.FET;<br/>MUS.LEG.FET; HRT.VENT.L; HRT.VNT.R;<br/>GI.CLN.SM.MUS; GI.RECT.SM.MUS;<br/>GI.STMC.MUS; GI.STMC.FET;<br/>GI.STMC.MUC; GI.ESO; GI.STMC.GAST;<br/>LNG.FET; ADRL.GLND.FET; PLCNT.FET;<br/>LIV.ADLT; PANC)</p> <p><b>19_DNase</b><br/>(VAS.AOR)</p> <p><b>13_EnhA1</b><br/>(GI.L.INT.FET; GI.S.INT; GI.CLN.MUC)</p> <p><b>14_EnhA2</b><br/>(GI.RECT.MUC.31)</p> | <p><b>15_EnhAF</b><br/>(BLD.K562.<br/>CNCR)</p>                          | <p>BLD.MOB.CD34.PC.F;<br/>BLD.CD34.CC; BLD.CD19.PPC;<br/>BLD.CD56.PC; BLD.CD15.PC;<br/>SKIN.PEN.FRSK.FIB.01;<br/>SKIN.PEN.FRSK.FIB.02;<br/>SKIN.PEN.FRSK.MEL.01;<br/><b>BRST.MYO</b>;<br/>BRN.CRTX.DR.NRSPHR; THYM;<br/>THYM.FET; BRN.HIPP.MID;<br/>BRN.SUB.NIG; BRN.ANT.CAUD;<br/>BRN.CING.GYR; BRN.INF.TMP;<br/>BRN.ANG.GYR;<br/>BRN.DL.PRFRTNL.CRTX;<br/>BRN.FET.F; BRN.FET.M;<br/>FAT.ADIP.NUC; MUS.PSOAS;<br/>MUS.SKLT.F; MUS.SKLT.M;<br/>MUS.TRNK.FET; MUS.LEG.FET;<br/>HRT.ATR.R; HRT.VENT.L;<br/>HRT.VNT.R; GI.DUO.SM.MUS;<br/>GI.CLN.SM.MUS;<br/>GI.RECT.SM.MUS; GI.STMC.MUS;<br/>GI.STMC.FET; GI.S.INT.FET;<br/>GI.L.INT.FET; GI.S.INT; GI.CLN.SIG;<br/>GI.CLN.MUC; GI.RECT.MUC.29;<br/>GI.RECT.MUC.31; GI.STMC.MUC;<br/>GI.DUO.MUC; GI.ESO;<br/>GI.STMC.GAST; PLCNT.AMN;<br/>KID.FET; LNG.FET; PANC.ISLT;<br/>ADRL.GLND.FET; PLCNT.FET;<br/>LIV.ADLT; PANC; LNG; SPLN</p> | <p>BLD.CD4.MPC;<br/>BLD.CD8.MPC;<br/>BLD.CD8.NPC;<br/>BLD.MOB.CD3<br/>4.PC.M;<br/>BLD.MOB.CD3<br/>4.PC.F;<br/>BLD.CD19.PPC<br/>;<br/>BLD.CD15.PC;<br/>MUS.SAT;<br/>SKIN.PEN.FRS<br/>K.FIB.01;<br/>SKIN.PEN.FRS<br/>K.FIB.02;<br/>BRN.ANT.CAU<br/>D;<br/>BRN.CING.GYR<br/>;<br/>GI.DUO.SM.M<br/>US;<br/>GI.CLN.SM.M<br/>US;<br/>GI.RECT.SM.M<br/>US;<br/>GI.DUO.MUC;<br/>GI.CLN.MUC;<br/>GI.RECT.MUC.<br/>29;<br/>GI.RECT.MUC.<br/>31;<br/>GI.STMC.MUC<br/>;<br/>GI.DUO.MUC;<br/>LIV.ADLT;<br/>SPLN</p> | <p>BLD.CD19.PPC;<br/>BLD.CD56.PC;<br/>SKIN.PEN.FRSK.FIB.02;<br/>THYM; THYM.FET;<br/>BRN.HIPP.MID;<br/>BRN.SUB.NIG;<br/>BRN.ANT.CAUD;<br/>BRN.CING.GYR;<br/>BRN.INF.TMP;<br/>BRN.ANG.GYR;<br/>BRN.DL.PRFRTNL.CRTX;<br/>FAT.ADIP.NUC; MUS.PSOAS;<br/>MUS.SKLT.F;<br/>MUS.TRNK.FET;<br/>MUS.LEG.FET; HRT.VENT.L;<br/>HRT.VNT.R;<br/>GI.DUO.SM.MUS;<br/>GI.CLN.SM.MUS;<br/>GI.RECT.SM.MUS;<br/>GI.STMC.MUS;<br/>GI.STMC.FET; GI.S.INT.FET;<br/>GI.L.INT.FET; GI.S.INT;<br/>GI.CLN.SIG; GI.CLN.MUC;<br/>GI.RECT.MUC.29;<br/>GI.RECT.MUC.31; GI.ESO;<br/>GI.STMC.GAST;<br/>ADRL.GLND.FET; PLCNT.FET;<br/>LIV.ADLT; LNG; SPLN</p> | <p>GI.CLN.MUC;<br/>GI.RECT.MUC.2<br/>9;<br/>GI.RECT.MUC.3<br/>1;<br/>GI.STMC.MUC;<br/>GI.DUO.MUC;<br/>LNG.FET;<br/>PANC.ISLT;<br/>LIV.ADLT.</p> | <p><b>H3K27ac</b><br/>BLD.DND4<br/>1.CNCR;<br/>BLD.GM1<br/>2878;<br/>CRVX.HEL<br/>AS3.CNCR<br/>;<br/><b>BRST.HME<br/>C</b>;<br/>BLD.CD14.<br/>MONO.</p> | <p>; LIV.HEP<br/>G2.CNCR<br/>;<br/>MUS.HS<br/>MMT.</p> |                                                                       |
| rs2706<br>336 | <p><b>12_TxEnhW</b><br/>(BLD.PER.MONUC.PC; BLD.CD3.CPC;<br/>THYM; BRN.HIPP.MID)</p> <p><b>9_TxReg</b></p>                                                                                                                                                                                                                                                                                                                                                                                                                                                                                                                                                                                                                                                                                                                                                                                                                                                                                                                                                                                                            | <p><b>13_EnhA1</b><br/>9BLD.DND4<br/>1.CNCR)</p> <p><b>10_TxEnh5</b></p> | <p>LNG.IMR90; IPSC.DF.19.11;<br/>ESDR.CD56.MESO;<br/>ESDR.CD56.ECTO;<br/>ESDR.H1.BMP4.TROP;<br/>ESDR.H1.MSC;<br/>BLD.PER.MONUC.PC;</p>                                                                                                                                                                                                                                                                                                                                                                                                                                                                                                                                                                                                                                                                                                                                               | <p>BLD.CD4.CD25<br/>I.CD127.TME<br/>MPC;<br/>BLD.CD4.CD25<br/>M.IL17P.PL.TP<br/>C;</p>                                                                                                                                                                                                                                                                                                                                                                                                                 | <p>ESDR.H1.MSC;<br/>BLD.PER.MONUC.PC;<br/>BLD.CD3.PPC;<br/>BLD.CD4.CD251.CD127.TME<br/>MPC;<br/>BLD.CD4.CD25.CD127M.TRE</p>                                                                                                                                                                                                                                                                                                                                                                                                                                                                                                | <p>ESDR.H1.NEUR.<br/>PROG;<br/>BLD.PER.MONU<br/>C.PC;<br/>BLD.CD4.NPC;<br/>BRN.ANG.GYR;</p>                                                     | <p><b>H3K4me1</b><br/>LNG.A549<br/>.ETOH002<br/>.CNCR;<br/>BLD.DND4<br/>1.CNCR;</p>                                                                     | <p><b>H3K4me<br/>3</b><br/>BLD.CD1<br/>4.MONO</p>      | <p>DNase<br/>ROADMAP<br/>GI.S.INT.FE<br/>T,<br/>GI.L.INT.FE<br/>T</p> |

|             |                                                                                                                                                                                                                                                                                                                                                                                                                                                                                                                                                                                                                                                                                                                                                                                                                                                                                                                                                                |                                                                                                                                                                           |                                                                                                                                                                                                                                                                                                                                                                                                                                                                                                                                                                                                                                                                                                                                                                                                                                                                                                                                                                                                                                 |                                                                                                                                                                                                                              |                                                                                                                                                                                                                                                                                                                                                                                                                                                                                                                                                                                              |                                                                                                                                                                 |                                                                                                                                                                                          |                                                           |                           |
|-------------|----------------------------------------------------------------------------------------------------------------------------------------------------------------------------------------------------------------------------------------------------------------------------------------------------------------------------------------------------------------------------------------------------------------------------------------------------------------------------------------------------------------------------------------------------------------------------------------------------------------------------------------------------------------------------------------------------------------------------------------------------------------------------------------------------------------------------------------------------------------------------------------------------------------------------------------------------------------|---------------------------------------------------------------------------------------------------------------------------------------------------------------------------|---------------------------------------------------------------------------------------------------------------------------------------------------------------------------------------------------------------------------------------------------------------------------------------------------------------------------------------------------------------------------------------------------------------------------------------------------------------------------------------------------------------------------------------------------------------------------------------------------------------------------------------------------------------------------------------------------------------------------------------------------------------------------------------------------------------------------------------------------------------------------------------------------------------------------------------------------------------------------------------------------------------------------------|------------------------------------------------------------------------------------------------------------------------------------------------------------------------------------------------------------------------------|----------------------------------------------------------------------------------------------------------------------------------------------------------------------------------------------------------------------------------------------------------------------------------------------------------------------------------------------------------------------------------------------------------------------------------------------------------------------------------------------------------------------------------------------------------------------------------------------|-----------------------------------------------------------------------------------------------------------------------------------------------------------------|------------------------------------------------------------------------------------------------------------------------------------------------------------------------------------------|-----------------------------------------------------------|---------------------------|
|             | <p>(BLD.CD3.PPC; BLD.CD56.PC; BLD.CD15.PC; GI.DUO.MUC; LIV.ADLT)</p> <p><b>10_TxEnhW</b><br/>(BLD.CD4.CD25I.CD127.TMEMPC; BLD.CD4.CD25.CD127M.TREGPC; BLD.CD4.CD25M.TPC; BLD.CD4.CD25M.CD45RA.NPC; BLD.CD4.CD25M.IL17M.PL.TPC; BLD.CD4.CD25M.IL17P.PL.TPC; BLD.CD4.CD25M.CD45RO.MPC; BLD.CD4.MPC; BLD.CD8.MPC; BLD.CD4.NPC; BLD.CD8.NPC; BLD.CD14.PC; BLD.CD19.CPC; BLD.CD34.PC; BLD.MOB.CD34.PC.M; BLD.MOB.CD34.PC.F; BLD.CD34.CC; BLD.CD19.PPC; THYM.FET; GI.DUO.SM.MUS; GI.S.INT.FET; GI.S.INT; GI.RECT.MUC.29)</p> <p><b>17_EnhW2</b><br/><b>BRST.MYO</b>; BRN.SUB.NIG; BRN.ANT.CAUD; BRN.CING.GYR; BRN.INF.TMP; MUS.SKLT.F; MUS.LEG.FET; MUS.SKLT.M; HRT.VNT.R; GI.RECT.SM.MUS; GI.STMC.MUS; GI.CLN.MUC; GI.ESO; GI.STMC.GAST; KID.FET; LNG.FET; ADRL.GLND.FET; PANC; LNG; SPLN)</p> <p><b>15_EnhAF</b><br/>(FAT.ADIP.NUC; GI.CLN.SM.MUS; GI.L.INT.FET; GI.CLN.SIG; GI.RECT.MUC.31; GI.STMC.MUC)</p> <p><b>11_TxEnh3</b><br/>(GI.STMC.FET; PLCNT.FET)</p> | <p>(BLD.GM12 878)</p> <p><b>17_EnhW2</b><br/>(CRVX.HELA S3.CNCR; BLD.K562.CNCR)</p> <p><b>15_EnhAF</b><br/>(LIV.HEPG2.CNCR)</p> <p><b>9_TxReg</b><br/>(BLD.CD14.MONO)</p> | <p>BLD.CD3.PPC; BLD.CD4.CD25I.CD127.TMEMPC; BLD.CD3.CPC; BLD.CD4.CD25.CD127M.TREGPC; BLD.CD4.CD25M.TPC; BLD.CD4.CD25M.CD45RA.NPC; BLD.CD4.CD25M.IL17M.PL.TPC; BLD.CD4.CD25M.IL17P.PL.TPC; BLD.CD4.CD25M.CD45RO.MPC; BLD.CD4.MPC; BLD.CD8.MPC; BLD.CD4.NPC; BLD.CD8.NPC; BLD.CD14.PC; BLD.CD19.CPC; BLD.CD34.PC; BLD.MOB.CD34.PC.M; BLD.MOB.CD34.PC.F; BLD.CD34.CC; BLD.CD19.PPC; BLD.CD56.PC; BLD.CD15.PC; STRM.MRW.MSC; SKIN.PEN.FRSK.FIB.01; SKIN.PEN.FRSK.FIB.02; SKIN.PEN.FRSK.KER.03; <b>BRST.MYO</b>; BRN.GANGEM.DR.NRSPHR; THYM; THYM.FET; BRN.HIPP.MID; BRN.SUB.NIG; BRN.ANT.CAUD; BRN.CING.GYR; BRN.DL.PRFRTNL.CRTX; FAT.ADIP.NUC; MUS.SKLT.F; MUS.SKLT.M; MUS.TRNK.FET; MUS.LEG.FET; HRT.FET; HRT.ATR.R; HRT.VENT.L; HRT.VNT.R; GI.DUO.SM.MUS; GI.CLN.SM.MUS; GI.RECT.SM.MUS; GI.STMC.MUS; GI.STMC.FET; GI.S.INT.FET; GI.L.INT.FET; GI.S.INT; GI.CLN.SIG; GI.CLN.MUC; GI.RECT.MUC.29; GI.RECT.MUC.31; GI.STMC.MUC; GI.DUO.MUC; GI.ESO; GI.STMC.GAST; LNG.FET; ADRL.GLND.FET; PLCNT.FET; LIV.ADLT; PANC; LNG; SPLN</p> | <p>BLD.CD4.CD25 M.CD45RO.M PC; BLD.CD4.MPC; BLD.CD8.MPC; BLD.MOB.CD3 4.PC.M; BLD.MOB.CD3 4.PC.F; BLD.CD15.PC; GI.DUO.SM.M US; GI.CLN.SM.M US; GI.RECT.SM.M US; GI.RECT.MUC. 29; GI.STMC.MUC ; GI.DUO.MUC; LIV.ADLT; PANC</p> | <p>GPC; BLD.CD4.CD25M.TPC; BLD.CD4.CD25M.CD45RA.N PC; BLD.CD4.CD25M.IL17M.PL.T PC; BLD.CD4.CD25M.IL17P.PL.T PC; BLD.CD4.CD25M.CD45RO.M PC; BLD.CD4.MPC; BLD.CD8.MPC; BLD.CD4.NPC; BLD.CD8.NPC; BLD.CD14.PC; BLD.CD19.PPC; BLD.CD56.PC; SKIN.PEN.FRSK.FIB.01; THYM; THYM.FET; BRN.HIPP.MID; BRN.ANT.CAUD; BRN.CING.GYR; FAT.ADIP.NUC; MUS.PSOAS; MUS.SKLT.F; HRT.ATR.R; HRT.VNT.R; GI.DUO.SM.MUS; GI.RECT.SM.MUS; GI.STMC.MUS; GI.STMC.FET; GI.S.INT.FET; GI.L.INT.FET; GI.S.INT; GI.CLN.SIG; GI.CLN.MUC; GI.RECT.MUC.29; GI.RECT.MUC.31; GI.ESO; GI.STMC.GAST; PLCNT.FET; LIV.ADLT; LNG;</p> | <p>FAT.ADIP.NUC; MUS.SKLT.M; HRT.FET; GI.CLN.SM.MUS ; GI.STMC.MUS; GI.CLN.MUC; GI.RECT.MUC.2 9; GI.RECT.MUC.3 1; GI.STMC.MUC; GI.DUO.MUC; LNG.FET; LIV.ADLT</p> | <p>BLD.GM1 2878; CRVX.HEL AS3.CNCR ; LIV.HEPG2 .CNCR; <b>BRST.HME C</b>; MUS.HSM MT; BLD.CD14. MONO; LNG.NHLF</p> <p><b>H3K27ac</b><br/>BLD.DND4 1.CNCR; BLD.CD14. MONO; BONE.OST EO</p> | <p><b>H3K9ac</b><br/>BLD.DND 41.CNCR ; BLD.CD1 4.MONO</p> | <p>ENCODE</p>             |
| rs7279 7306 | <p><b>14_EnhW2</b><br/>(LNG.IMR90; ESC.H9; ESC.I3; ESC.HUES6; ESC.HUES48; ESC.HUES64; ESC.H1; ESC.4STAR; IPSC.20B; IPSC.18; IPSC.15b;</p>                                                                                                                                                                                                                                                                                                                                                                                                                                                                                                                                                                                                                                                                                                                                                                                                                      | <p><b>14_EnhA2</b><br/>(LNG.A549. ETOH002.C NCR;</p>                                                                                                                      | <p>LNG.IMR90; ESC.WA7; ESC.H9; ESC.I3; ESC.HUES6; ESC.HUES48; ESC.HUES64; ESC.H1; ESC.4STAR; IPSC.20B; IPSC.18; IPSC.15b;</p>                                                                                                                                                                                                                                                                                                                                                                                                                                                                                                                                                                                                                                                                                                                                                                                                                                                                                                   | <p>ESC.HUES6; IPSC.20B; IPSC.18; BLD.PER.MON</p>                                                                                                                                                                             | <p>LNG.IMR90; ESC.HUES64; ESC.H1; IPSC.20B; IPSC.DF.19.11; ESDR.H1.BMP4.TROP;</p>                                                                                                                                                                                                                                                                                                                                                                                                                                                                                                            | <p>LNG.IMR90; ESC.H9; ESC.I3; ESC.HUES6; ESC.H1;</p>                                                                                                            | <p><b>H3K4me1</b><br/>LNG.A549 .ETOH002 .CNCR;</p>                                                                                                                                       | <p><b>H3K4me 3</b><br/>LNG.A54 9.ETOH0</p>                | <p>ROADMAP<br/>ENCODE</p> |

|                                                                                                                                                                                                                                                                                                                                                                                                                                                                                                                                                                                                                                                                                                                                                                                                                                                                                                                                                                                                                                                                                     |                                                                                                                                                                                                                                                                                                                                                                                                                                                         |                                                                                                                                                                                                                                                                                                                                                                                                                                                                                                                                                                                                                                                                                                                                                                                                                                                                                                                                                                                                                                                                                                                                                                                                                                                                |                                                                                                                                                                                                                                                                                                                                                                                                                                                                                                                                                                                                                                                                                                       |                                                                                                                                                                                                                                                                                                                                                                                                                                                                                                                                                                                                                                                                                                                                                                                                                                                                                                                                                                                                              |                                                                                                                                                                                                                                                                                                                                                                                                                                                                                                                                                                                                                            |                                                                                                                                                                                                                                                                                                                                                                                                                                                                                                                                               |                                                                                                                                                                                                                                                                                                                                                                                                                                                                                                         |                                                                                                                                                             |
|-------------------------------------------------------------------------------------------------------------------------------------------------------------------------------------------------------------------------------------------------------------------------------------------------------------------------------------------------------------------------------------------------------------------------------------------------------------------------------------------------------------------------------------------------------------------------------------------------------------------------------------------------------------------------------------------------------------------------------------------------------------------------------------------------------------------------------------------------------------------------------------------------------------------------------------------------------------------------------------------------------------------------------------------------------------------------------------|---------------------------------------------------------------------------------------------------------------------------------------------------------------------------------------------------------------------------------------------------------------------------------------------------------------------------------------------------------------------------------------------------------------------------------------------------------|----------------------------------------------------------------------------------------------------------------------------------------------------------------------------------------------------------------------------------------------------------------------------------------------------------------------------------------------------------------------------------------------------------------------------------------------------------------------------------------------------------------------------------------------------------------------------------------------------------------------------------------------------------------------------------------------------------------------------------------------------------------------------------------------------------------------------------------------------------------------------------------------------------------------------------------------------------------------------------------------------------------------------------------------------------------------------------------------------------------------------------------------------------------------------------------------------------------------------------------------------------------|-------------------------------------------------------------------------------------------------------------------------------------------------------------------------------------------------------------------------------------------------------------------------------------------------------------------------------------------------------------------------------------------------------------------------------------------------------------------------------------------------------------------------------------------------------------------------------------------------------------------------------------------------------------------------------------------------------|--------------------------------------------------------------------------------------------------------------------------------------------------------------------------------------------------------------------------------------------------------------------------------------------------------------------------------------------------------------------------------------------------------------------------------------------------------------------------------------------------------------------------------------------------------------------------------------------------------------------------------------------------------------------------------------------------------------------------------------------------------------------------------------------------------------------------------------------------------------------------------------------------------------------------------------------------------------------------------------------------------------|----------------------------------------------------------------------------------------------------------------------------------------------------------------------------------------------------------------------------------------------------------------------------------------------------------------------------------------------------------------------------------------------------------------------------------------------------------------------------------------------------------------------------------------------------------------------------------------------------------------------------|-----------------------------------------------------------------------------------------------------------------------------------------------------------------------------------------------------------------------------------------------------------------------------------------------------------------------------------------------------------------------------------------------------------------------------------------------------------------------------------------------------------------------------------------------|---------------------------------------------------------------------------------------------------------------------------------------------------------------------------------------------------------------------------------------------------------------------------------------------------------------------------------------------------------------------------------------------------------------------------------------------------------------------------------------------------------|-------------------------------------------------------------------------------------------------------------------------------------------------------------|
| <p>IPSC.DF.19.11; ESDR.CD56.MESO; ESDR.CD56.ECTO; FAT.ADIP.DR.MSC; FAT.MSC.DR.ADIP; SKIN.PEN.FRSK.MEL.01; SKIN.PEN.FRSK.MEL.03; BRN.GANGEM.DR.NRSPHR; BRN.SUB.NIG; BRN.ANT.CAUD; BRN.CING.GYR; BRN.ANG.GYR; BRN.GRM.MTRX; BRN.FET.F; BRN.FET.M; MUS.PSOAS; MUS.SKLT.F; HRT.VENT.L; HRT.VNT.R; PLCNT.AMN; KID.FET; OVRY; PANC.ISLT)</p> <p>17_EnhW2<br/>(ESC.WA7; PSC.DF.6.9)</p> <p>15_EnhAF<br/>(ESDR.H1.NEUR.PROG; ESDR.CD184.ENDO; HRT.FET; VAS.AOR; GI.STMC.GAST; PANC)</p> <p>16_EnhW1<br/><br/>(ESDR.H9.NEUR.PROG; ESDR.H9.NEUR; ESDR.H1.BMP4.MESO)</p> <p><b>13_EnhA1</b><br/>(ESDR.H1.BMP4.TROP; ESDR.H1.MSC; STRM.CHON.MRW.DR.MSC; SKIN.PEN.FRSK.FIB.01; SKIN.PEN.FRSK.FIB.02; <b>BRST.HMEC.35</b>; BRN.CRTX.DR.NRSPHR; BRN.HIPP.MID; BRN.INF.TMP; BRN.DL.PRFRTNL.CRTX; MUS.TRNK.FET; HRT.ATR.R; GI.STMC.FET; GI.S.INT; GI.CLN.SIG; GI.ESO; LNG)</p> <p>3_PromD1<br/><br/>(BLD.PER.MONUC.PC; BLD.CD3.PPC; BLD.CD4.CD251.CD127.TMEMPC; BLD.CD4.CD25.CD127M.TREGPC; BLD.CD4.CD25M.TPC; BLD.CD4.CD25M.CD45RA.NPC; BLD.CD4.CD25M.IL17M.PL.TPC; BLD.CD4.CD25M.IL17P.PL.TPC;</p> | <p>LIV.HEPG2.<br/>CNCR;<br/>BRN.NHA;<br/>SKIN.NHDF<br/>AD;<br/>LNG.NHLF)</p> <p><b>3_PromD1</b><br/>(BLD.DND4<br/>1.CNCR;<br/>BLD.GM12<br/>878;<br/>BLD.CD14.<br/>MONO)</p> <p><b>15_EnhAF</b><br/>(CRVX.HELA<br/>S3.CNCR)</p> <p><b>2_PromU</b><br/><b>(BRST.HME<br/>C;</b><br/>MUS.HSM<br/>M;<br/>MUS.HSM<br/>MT;<br/>SKIN.NHEK;<br/>BONE.OSTE<br/>O)</p> <p><b>13_EnhA1</b><br/>(VAS.HUVE<br/>C)</p> <p><b>15_EnhAF</b><br/>(BLD.K562.<br/>CNCR)</p> | <p>PSC.DF.6.9; IPSC.DF.19.11;<br/>ESDR.H1.NEUR.PROG;<br/>ESDR.H9.NEUR.PROG;<br/>ESDR.CD56.MESO;<br/>ESDR.CD56.ECTO;<br/>ESDR.CD184.ENDO;<br/>ESDR.H1.BMP4.MESO;<br/>ESDR.H1.BMP4.TROP;<br/>ESDR.H1.MSC;<br/>BLD.PER.MONUC.PC;<br/>BLD.CD3.PPC;<br/>BLD.CD4.CD251.CD127.TMEMPC;<br/>BLD.CD3.CPC;<br/>BLD.CD4.CD25.CD127M.TREGPC;<br/>BLD.CD4.CD25M.TPC;<br/>BLD.CD4.CD25M.CD45RA.NPC;<br/>BLD.CD4.CD25M.IL17M.PL.TPC;<br/>BLD.CD4.CD25M.IL17P.PL.TPC;<br/>BLD.CD4.CD25M.CD45RO.MPC;<br/>BLD.CD4.MPC; BLD.CD8.MPC;<br/>BLD.CD4.NPC; BLD.CD8.NPC;<br/>BLD.CD14.PC; BLD.CD19.CPC;<br/>BLD.CD34.PC;<br/>BLD.MOB.CD34.PC.M;<br/>BLD.MOB.CD34.PC.F;<br/>BLD.CD34.CC; BLD.CD19.PPC;<br/>BLD.CD56.PC; BLD.CD15.PC;<br/>STRM.MRW.MSC;<br/>STRM.CHON.MRW.DR.MSC;<br/>FAT.ADIP.DR.MSC;<br/>FAT.MSC.DR.ADIP; MUS.SAT;<br/>SKIN.PEN.FRSK.FIB.01;<br/>SKIN.PEN.FRSK.FIB.02;<br/>SKIN.PEN.FRSK.MEL.01;<br/>SKIN.PEN.FRSK.MEL.03;<br/>SKIN.PEN.FRSK.KER.02;<br/>SKIN.PEN.FRSK.KER.03;<br/><b>BRST.HMEC.35; BRST.MYO;</b><br/>BRN.GANGEM.DR.NRSPHR;<br/>BRN.CRTX.DR.NRSPHR; THYM;<br/>THYM.FET; BRN.HIPP.MID;<br/>BRN.SUB.NIG; BRN.ANT.CAUD;<br/>BRN.CING.GYR; BRN.INF.TMP;<br/>BRN.ANG.GYR;<br/>BRN.DL.PRFRTNL.CRTX;<br/>BRN.FET.F; BRN.FET.M;<br/>FAT.ADIP.NUC; MUS.PSOAS;</p> | <p>UC.PC;<br/>BLD.CD3.PPC;<br/>BLD.CD4.CD25<br/>I.CD127.TME<br/>MPC;<br/>BLD.CD3.CPC;<br/>BLD.CD4.CD25<br/>.CD127M.TRE<br/>GPC;<br/>BLD.CD4.CD25<br/>M.TPC;<br/>BLD.CD4.CD25<br/>M.CD45RA.NP<br/>C;<br/>BLD.CD4.CD25<br/>M.IL17M.PL.T<br/>PC;<br/>BLD.CD4.CD25<br/>M.IL17P.PL.TP<br/>C;<br/>BLD.CD4.CD25<br/>M.CD45RO.M<br/>PC;<br/>BLD.CD4.MPC;<br/>BLD.CD8.MPC;<br/>BLD.CD4.NPC;<br/>BLD.CD8.NPC;<br/>BLD.CD14.PC;<br/>BLD.CD19.CPC<br/>;<br/>BLD.CD34.PC;<br/>BLD.MOB.CD3<br/>4.PC.M;<br/>BLD.MOB.CD3<br/>4.PC.F;<br/>BLD.CD34.CC;<br/>BLD.CD19.PPC<br/>;<br/>BLD.CD15.PC;<br/>STRM.MRW.<br/>MSC;<br/>STRM.CHON.<br/>MRW.DR.MSC<br/>; MUS.SAT;<br/>SKIN.PEN.FRS<br/>K.FIB.01;<br/>SKIN.PEN.FRS</p> | <p>ESDR.H1.MSC;<br/>BLD.PER.MONUC.PC;<br/>BLD.CD3.PPC;<br/>BLD.CD4.CD251.CD127.TME<br/>MPC;<br/>BLD.CD4.CD25.CD127M.TRE<br/>GPC; BLD.CD4.CD25M.TPC;<br/>BLD.CD4.CD25M.CD45RA.N<br/>PC;<br/>BLD.CD4.CD25M.IL17M.PL.T<br/>PC;<br/>BLD.CD4.CD25M.IL17P.PL.T<br/>PC;<br/>BLD.CD4.CD25M.CD45RO.M<br/>PC; BLD.CD4.MPC;<br/>BLD.CD8.MPC;<br/>BLD.CD4.NPC;<br/>BLD.CD8.NPC; BLD.CD14.PC;<br/>BLD.MOB.CD34.PC.F;<br/>BLD.CD19.PPC;<br/>STRM.MRW.MSC;<br/>SKIN.PEN.FRSK.FIB.01;<br/>SKIN.PEN.FRSK.FIB.02;<br/>SKIN.PEN.FRSK.MEL.01;<br/>SKIN.PEN.FRSK.KER.03;<br/>THYM; THYM.FET;<br/>BRN.HIPP.MID;<br/>BRN.SUB.NIG;<br/>BRN.ANT.CAUD;<br/>BRN.CING.GYR;<br/>BRN.INF.TMP;<br/>BRN.ANG.GYR;<br/>BRN.DL.PRFRTNL.CRTX;<br/>FAT.ADIP.NUC; MUS.PSOAS;<br/>MUS.SKLT.F;<br/>MUS.TRNK.FET;<br/>MUS.LEG.FET; HRT.ATR.R;<br/>HRT.VENT.L; HRT.VNT.R;<br/>GI.DUO.SM.MUS;<br/>GI.CLN.SM.MUS;<br/>GI.RECT.SM.MUS;<br/>GI.STMC.MUS;<br/>GI.S.INT.FET;<br/>GI.L.INT.FET; GI.S.INT;<br/>GI.CLN.SIG; GI.CLN.MUC;<br/>GI.RECT.MUC.29;</p> | <p>IPSC.20B;<br/>IPSC.15b;<br/>ESDR.H1.NEUR.<br/>PROG;<br/>ESDR.H1.MSC;<br/>BLD.PER.MONU<br/>C.PC;<br/>BLD.CD4.NPC;<br/>BLD.CD8.NPC;<br/>STRM.MRW.MS<br/>C;<br/>STRM.CHON.M<br/>RW.DR.MSC;<br/>MUS.SAT;<br/><b>BRST.MYO;</b><br/>BRN.SUB.NIG;<br/>BRN.ANT.CAUD<br/>;<br/>BRN.CING.GYR;<br/>BRN.INF.TMP;<br/>BRN.ANG.GYR;<br/>BRN.DL.PRFRT<br/>L.CRTX;<br/>FAT.ADIP.NUC;<br/>MUS.SKLT.F;<br/>MUS.SKLT.M;<br/>GI.CLN.SM.MUS<br/>;<br/>GI.RECT.SM.MU<br/>S;<br/>GI.STMC.MUS;<br/>GI.CLN.MUC;<br/>GI.RECT.MUC.2<br/>9;<br/>GI.RECT.MUC.3<br/>1;<br/>GI.STMC.MUC;<br/>GI.DUO.MUC;<br/>LNG.FET;<br/>PANC.ISLT;<br/>LIV.ADLT.</p> | <p>BLD.DND4<br/>1.CNCR;<br/>BLD.GM1<br/>2878;<br/>CRVX.HEL<br/>AS3.CNCR<br/>;<br/>LIV.HEPG2<br/>.CNCR;<br/><b>BRST.HME<br/>C;</b><br/>MUS.HSM<br/>M;<br/>MUS.HSM<br/>MT;<br/>VAS.HUVE<br/>C;<br/>BLD.K562.<br/>CNCR;<br/>BLD.CD14.<br/>MONO;<br/>BRN.NHA;<br/>SKIN.NHD<br/>FAD;<br/>SKIN.NHE<br/>K;<br/>LNG.NHLF<br/>;<br/>BONE.OST<br/>EO</p> <p><b>H3K27ac</b><br/>BLD.DND4<br/>1.CNCR;<br/>BLD.GM1<br/>2878;<br/>CRVX.HEL<br/>AS3.CNCR<br/>;<br/><b>BRST.HME<br/>C;</b><br/>MUS.HSM<br/>M;<br/>MUS.HSM<br/>MT;<br/>BLD.CD14.<br/>MONO;</p> | <p>02.CNCR<br/>;<br/>BLD.DND<br/>41.CNCR<br/>;<br/>BLD.GM<br/>12878;<br/><b>BRST.H<br/>MEC;</b><br/>MUS.HS<br/>MM;<br/>MUS.HS<br/>MMT;<br/>BLD.CD1<br/>4.MONO<br/>;<br/>SKIN.NH<br/>EK;<br/>BONE.O<br/>STEO</p> <p><b>H3K9ac</b><br/>LNG.A54<br/>9.ETOHO<br/>02.CNCR<br/>;<br/>BLD.DND<br/>41.CNCR<br/>;<br/>BLD.GM<br/>12878;<br/>LIV.HEP<br/>G2.CNCR<br/>;<br/><b>BRST.H<br/>MEC;</b><br/>MUS.HS<br/>MM;<br/>MUS.HS<br/>MMT;<br/>VAS.HUV<br/>EC;<br/>BLD.CD1<br/>4.MONO<br/>;<br/>SKIN.NH<br/>EK;</p> | <p>IPSC.DF.6.9<br/>;<br/>BLD.CD3.PP<br/>C;<br/>SKIN.PEN.F<br/>RSK.MEL.01<br/>; HYM.FET;<br/>GI.STMC.FE<br/>T;<br/>GI.L.INT.FE<br/>T;<br/>MUS.HSM<br/>MT</p> |
|-------------------------------------------------------------------------------------------------------------------------------------------------------------------------------------------------------------------------------------------------------------------------------------------------------------------------------------------------------------------------------------------------------------------------------------------------------------------------------------------------------------------------------------------------------------------------------------------------------------------------------------------------------------------------------------------------------------------------------------------------------------------------------------------------------------------------------------------------------------------------------------------------------------------------------------------------------------------------------------------------------------------------------------------------------------------------------------|---------------------------------------------------------------------------------------------------------------------------------------------------------------------------------------------------------------------------------------------------------------------------------------------------------------------------------------------------------------------------------------------------------------------------------------------------------|----------------------------------------------------------------------------------------------------------------------------------------------------------------------------------------------------------------------------------------------------------------------------------------------------------------------------------------------------------------------------------------------------------------------------------------------------------------------------------------------------------------------------------------------------------------------------------------------------------------------------------------------------------------------------------------------------------------------------------------------------------------------------------------------------------------------------------------------------------------------------------------------------------------------------------------------------------------------------------------------------------------------------------------------------------------------------------------------------------------------------------------------------------------------------------------------------------------------------------------------------------------|-------------------------------------------------------------------------------------------------------------------------------------------------------------------------------------------------------------------------------------------------------------------------------------------------------------------------------------------------------------------------------------------------------------------------------------------------------------------------------------------------------------------------------------------------------------------------------------------------------------------------------------------------------------------------------------------------------|--------------------------------------------------------------------------------------------------------------------------------------------------------------------------------------------------------------------------------------------------------------------------------------------------------------------------------------------------------------------------------------------------------------------------------------------------------------------------------------------------------------------------------------------------------------------------------------------------------------------------------------------------------------------------------------------------------------------------------------------------------------------------------------------------------------------------------------------------------------------------------------------------------------------------------------------------------------------------------------------------------------|----------------------------------------------------------------------------------------------------------------------------------------------------------------------------------------------------------------------------------------------------------------------------------------------------------------------------------------------------------------------------------------------------------------------------------------------------------------------------------------------------------------------------------------------------------------------------------------------------------------------------|-----------------------------------------------------------------------------------------------------------------------------------------------------------------------------------------------------------------------------------------------------------------------------------------------------------------------------------------------------------------------------------------------------------------------------------------------------------------------------------------------------------------------------------------------|---------------------------------------------------------------------------------------------------------------------------------------------------------------------------------------------------------------------------------------------------------------------------------------------------------------------------------------------------------------------------------------------------------------------------------------------------------------------------------------------------------|-------------------------------------------------------------------------------------------------------------------------------------------------------------|

|               |                                                                                                                                                                                                                                                                                                                                                                                                                                                                                                                                                                                                                                                                                                       |                                                                                                                    |                                                                                                                                                                                                                                                                                                                                                                                                                                                                                         |                                                                                                                                                                                                                                                                                                                                                                                                                                                                                                                                              |                                                                                                                                                                                            |                                                                           |                                                                                                                    |                                                            |  |
|---------------|-------------------------------------------------------------------------------------------------------------------------------------------------------------------------------------------------------------------------------------------------------------------------------------------------------------------------------------------------------------------------------------------------------------------------------------------------------------------------------------------------------------------------------------------------------------------------------------------------------------------------------------------------------------------------------------------------------|--------------------------------------------------------------------------------------------------------------------|-----------------------------------------------------------------------------------------------------------------------------------------------------------------------------------------------------------------------------------------------------------------------------------------------------------------------------------------------------------------------------------------------------------------------------------------------------------------------------------------|----------------------------------------------------------------------------------------------------------------------------------------------------------------------------------------------------------------------------------------------------------------------------------------------------------------------------------------------------------------------------------------------------------------------------------------------------------------------------------------------------------------------------------------------|--------------------------------------------------------------------------------------------------------------------------------------------------------------------------------------------|---------------------------------------------------------------------------|--------------------------------------------------------------------------------------------------------------------|------------------------------------------------------------|--|
|               | <p>BLD.CD4.CD25M.CD45RO.MPC;<br/>BLD.CD4.MPC; BLD.CD8.MPC;<br/>BLD.CD4.NPC; BLD.CD8.NPC;<br/>BLD.CD14.PC; BLD.CD19.CPC;<br/>BLD.CD34.PC; BLD.MOB.CD34.PC.M;<br/>BLD.MOB.CD34.PC.F; BLD.CD34.CC;<br/>BLD.CD19.PPC; BLD.CD56.PC;<br/>BLD.CD15.PC; THYM; THYM.FET;<br/>FAT.ADIP.NUC; GI.DUO.SM.MUS;<br/>GI.S.INT.FET; GI.CLN.MUC;<br/>GI.RECT.MUC.29; GI.DUO.MUC;<br/>PLCNT.FET;<br/>SPLN)</p> <p><b>2_PromU</b><br/>(BLD.CD3.CPC; STRM.MRW.MSC;<br/>MUS.SAT; SKIN.PEN.FRSK.KER.02;<br/>SKIN.PEN.FRSK.KER.03; <b>BRST.MYO</b>;<br/>MUS.SKLT.M; MUS.LEG.FET;<br/>GI.CLN.SM.MUS; GI.RECT.SM.MUS;<br/>GI.STMC.MUS; GI.L.INT.FET;<br/>GI.RECT.MUC.31; GI.STMC.MUC;<br/>LNG.FET; ADRL.GLND.FET; LIV.ADLT)</p> |                                                                                                                    | <p>MUS.SKLT.F; MUS.SKLT.M;<br/>MUS.TRNK.FET; MUS.LEG.FET;<br/>HRT.FET; HRT.ATR.R; HRT.VENT.L;<br/>HRT.VNT.R; GI.DUO.SM.MUS;<br/>GI.CLN.SM.MUS;<br/>GI.RECT.SM.MUS; GI.STMC.MUS;<br/>GI.STMC.FET; GI.S.INT.FET;<br/>GI.L.INT.FET; GI.S.INT; GI.CLN.SIG;<br/>GI.CLN.MUC; GI.RECT.MUC.29;<br/>GI.RECT.MUC.31; GI.STMC.MUC;<br/>GI.DUO.MUC; GI.ESO;<br/>GI.STMC.GAST; PLCNT.AMN;<br/>KID.FET; LNG.FET; OVRY;<br/>PANC.ISLT; ADRL.GLND.FET;<br/>PLCNT.FET; LIV.ADLT; PANC; LNG;<br/>SPLN</p> | <p>K.FIB.02;<br/>SKIN.PEN.FR<br/>K.KER.02;<br/>SKIN.PEN.FR<br/>K.KER.03;<br/><b>BRST.MYO</b>;<br/>THYM;<br/>THYM.FET;<br/>BRN.HIPP.MID<br/>;<br/>BRN.ANT.CAU<br/>D;<br/>BRN.DL.PRF<br/>NTL.CRTX;<br/>FAT.ADIP.NUC<br/>; MUS.SKLT.F;<br/>MUS.SKLT.M;<br/>MUS.LEG.FET;<br/>GI.DUO.SM.M<br/>US;<br/>GI.CLN.SM.M<br/>US;<br/>GI.RECT.SM.M<br/>US;<br/>GI.STMC.MUS;<br/>GI.CLN.SIG;<br/>GI.CLN.MUC;<br/>GI.RECT.MUC.<br/>29;<br/>GI.RECT.MUC.<br/>31;<br/>GI.STMC.MUC<br/>;<br/>GI.DUO.MUC;<br/>GI.ESO;<br/>PLCNT.AMN;<br/>LIV.ADLT;<br/>SPLN</p> | <p>GI.RECT.MUC.31; GI.ESO;<br/>GI.STMC.GAST; OVRY;<br/>PANC.ISLT; ADRL.GLND.FET;<br/>PLCNT.FET; LIV.ADLT; PANC;<br/>LNG; SPLN</p>                                                          |                                                                           | <p>SKIN.NHD<br/>FAD;<br/>SKIN.NHE<br/>K;<br/>LNG.NHLF<br/>;<br/>BONE.OST<br/>EO</p>                                | <p>LNG.NHL<br/>F</p>                                       |  |
| rs2248<br>116 | <p><b>17_EnhW2</b><br/>(ESDR.H1.MSC; BLD.PER.MONUC.PC;<br/>BLD.CD4.CD25M.IL17P.PL.TPC;<br/>BLD.CD8.MPC; BLD.CD4.NPC;<br/>BLD.CD8.NPC; BLD.CD34.PC;<br/>STRM.MRW.MSC;<br/>STRM.CHON.MRW.DR.MSC;<br/>FAT.MSC.DR.ADIP; MUS.SAT;<br/>SKIN.PEN.FRSK.FIB.01;</p>                                                                                                                                                                                                                                                                                                                                                                                                                                            | <p><b>17_EnhW2</b><br/>(BLD.DND4<br/>1.CNCR;<br/><b>BRST.HMEC</b><br/>;<br/>MUS.HSM<br/>M;<br/>MUS.HSM<br/>MT;</p> | <p>LNG.IMR90; ESDR.CD56.MESO;<br/>BLD.PER.MONUC.PC;<br/>BLD.CD3.PPC;<br/>BLD.CD4.CD25I.CD127.TMEMPC;<br/>BLD.CD3.CPC;<br/>BLD.CD4.CD25.CD127M.TREGPC;<br/>BLD.CD4.CD25M.TPC;<br/>BLD.CD4.CD25M.CD45RA.NPC;<br/>BLD.CD4.CD25M.IL17M.PL.TPC;</p>                                                                                                                                                                                                                                          | <p>BLD.CD4.CD25<br/>M.TPC;<br/>BLD.CD8.MPC;<br/>BLD.CD4.NPC;<br/>BLD.CD19.CPC<br/>;<br/>BLD.MOB.CD3<br/>4.PC.M;<br/>BLD.CD19.PPC</p>                                                                                                                                                                                                                                                                                                                                                                                                         | <p>ESDR.H1.MSC;<br/>BLD.PER.MONUC.PC;<br/>BLD.CD3.PPC;<br/>BLD.CD4.CD25I.CD127.TME<br/>MPC;<br/>BLD.CD4.CD25.CD127M.TRE<br/>GPC; BLD.CD4.CD25M.TPC;<br/>BLD.CD4.CD25M.CD45RA.N<br/>PC;</p> | <p>FAT.MSC.DR.AD<br/>IP; MUS.SAT;<br/>GI.RECT.MUC.2<br/>9; GI.DUO.MUC</p> | <p><b>H3K4me1</b><br/>BLD.DND4<br/>1.CNCR;<br/>BLD.GM1<br/>2878;<br/>CRVX.HEL<br/>AS3.CNCR<br/>;<br/>LIV.HEPG2</p> | <p><b>BLD.DN<br/>D41.CNC<br/>R;<br/>MUS.HS<br/>MMT</b></p> |  |

|                |                                                                                                                                                                                                                                                                                                                                                                                                                                                                                                                                                                                                                                                                               |                                                                                                                                                                                                                          |                                                                                                                                                                                                                                                                                                                                                                                                                                                                                                                                                                                                                                                                                                                                                                                 |                                                                                                                                                                |                                                                                                                                                                                                                                                                                                                                                                                                                                                                                               |                                                                                                                                                                                                                                                                                                                                                                                                      |                                                                                                                                                       |                                                                                                 |                                                                                                                                        |
|----------------|-------------------------------------------------------------------------------------------------------------------------------------------------------------------------------------------------------------------------------------------------------------------------------------------------------------------------------------------------------------------------------------------------------------------------------------------------------------------------------------------------------------------------------------------------------------------------------------------------------------------------------------------------------------------------------|--------------------------------------------------------------------------------------------------------------------------------------------------------------------------------------------------------------------------|---------------------------------------------------------------------------------------------------------------------------------------------------------------------------------------------------------------------------------------------------------------------------------------------------------------------------------------------------------------------------------------------------------------------------------------------------------------------------------------------------------------------------------------------------------------------------------------------------------------------------------------------------------------------------------------------------------------------------------------------------------------------------------|----------------------------------------------------------------------------------------------------------------------------------------------------------------|-----------------------------------------------------------------------------------------------------------------------------------------------------------------------------------------------------------------------------------------------------------------------------------------------------------------------------------------------------------------------------------------------------------------------------------------------------------------------------------------------|------------------------------------------------------------------------------------------------------------------------------------------------------------------------------------------------------------------------------------------------------------------------------------------------------------------------------------------------------------------------------------------------------|-------------------------------------------------------------------------------------------------------------------------------------------------------|-------------------------------------------------------------------------------------------------|----------------------------------------------------------------------------------------------------------------------------------------|
|                | <p>SKIN.PEN.FRSK.FIB.02; <b>BRST.HMEC.35</b>;<br/>FAT.ADIP.NUC; GI.S.INT; GI.CLN.SIG;<br/>GI.CLN.MUC; GI.RECT.MUC.29;<br/>GI.RECT.MUC.31; GI.STMC.MUC;<br/>GI.DUO.MUC; SPLN)</p> <p><b>10_TxEnh5</b><br/>(BLD.CD3.PPC; BLD.CD4.CD25M.TPC;<br/>BLD.CD4.MPC; BLD.MOB.CD34.PC.F;<br/>BLD.CD19.PPC; BLD.CD56.PC; THYM.FET)</p> <p><b>12_TxEnhW</b><br/>(BLD.CD4.CD25I.CD127.TMEMPC;<br/>BLD.CD3.CPC;<br/>BLD.CD4.CD25.CD127M.TREGPC;<br/>BLD.CD4.CD25M.CD45RA.NPC;<br/>BLD.CD4.CD25M.IL17M.PL.TPC;<br/>BLD.CD4.CD25M.CD45RO.MPC;<br/>THYM)</p> <p><b>15_EnhAF</b><br/>(BLD.CD14.PC; BLD.CD19.CPC;<br/>BLD.MOB.CD34.PC.M; BLD.CD34.CC)</p> <p><b>9_TxReg</b><br/>(BLD.CD15.PC)</p> | <p>BLD.K562.C<br/>NCR;<br/>BRN.NHA;<br/>SKIN.NHDF<br/>AD;<br/>LNG.NHLF)</p> <p><b>12_TxEnhW</b><br/>(BLD.GM12<br/>878)</p> <p><b>10_TxEnh5</b><br/>(BLD.CD14.<br/>MONO)</p> <p><b>15_EnhAF</b><br/>(BONE.OST<br/>EO)</p> | <p>BLD.CD4.CD25M.IL17P.PL.TPC;<br/>BLD.CD4.CD25M.CD45RO.MPC;<br/>BLD.CD4.MPC; BLD.CD8.MPC;<br/>BLD.CD4.NPC; BLD.CD8.NPC;<br/>BLD.CD14.PC; BLD.CD19.CPC;<br/>BLD.CD34.PC;<br/>BLD.MOB.CD34.PC.M;<br/>BLD.MOB.CD34.PC.F;<br/>BLD.CD34.CC; BLD.CD19.PPC;<br/>STRM.MRW.MSC;<br/>STRM.CHON.MRW.DR.MSC;<br/>FAT.ADIP.DR.MSC;<br/>FAT.MSC.DR.ADIP; MUS.SAT;<br/>SKIN.PEN.FRSK.FIB.01;<br/>SKIN.PEN.FRSK.FIB.02;<br/>SKIN.PEN.FRSK.KER.02;<br/>SKIN.PEN.FRSK.KER.03;<br/><b>BRST.HMEC.35; BRST.MYO</b>;<br/>THYM.FET;<br/>BRN.DL.PRFRTNL.CRTX;<br/>FAT.ADIP.NUC; GI.DUO.SM.MUS;<br/>GI.CLN.SM.MUS; GI.STMC.MUS;<br/>GI.STMC.FET; GI.S.INT.FET;<br/>GI.L.INT.FET; GI.S.INT;<br/>GI.CLN.MUC; GI.RECT.MUC.29;<br/>GI.RECT.MUC.31; GI.STMC.MUC;<br/>GI.DUO.MUC; PLCNT.FET;<br/>LIV.ADLT</p> | <p>; BLD.CD15.PC;<br/>STRM.MRW.<br/>MSC;<br/>GI.DUO.SM.M<br/>US;<br/>GI.CLN.SIG;<br/>GI.CLN.MUC;<br/>GI.DUO.MUC</p>                                            | <p>BLD.CD4.CD25M.IL17M.PL.T<br/>PC;<br/>BLD.CD4.CD25M.IL17P.PL.T<br/>PC;<br/>BLD.CD4.CD25M.CD45RO.M<br/>PC; BLD.CD4.MPC;<br/>BLD.CD8.MPC;<br/>BLD.CD8.NPC;<br/>BLD.MOB.CD34.PC.F;<br/>BLD.CD19.PPC;<br/>BLD.CD56.PC;<br/>STRM.MRW.MSC; THYM;<br/>THYM.FET; FAT.ADIP.NUC;<br/>MUS.SKLT.F;<br/>MUS.TRNK.FET;<br/>GI.DUO.SM.MUS;<br/>GI.STMC.MUS; GI.L.INT.FET;<br/>GI.S.INT; GI.CLN.SIG;<br/>GI.CLN.MUC;<br/>GI.RECT.MUC.29; GI.ESO;<br/>ADRL.GLND.FET; PLCNT.FET;<br/>LIV.ADLT; PANC; SPLN</p> | <p>.CNCR;<br/><b>BRST.HME<br/>C</b>;<br/>MUS.HSM<br/>M;<br/>MUS.HSM<br/>MT;<br/>VAS.HUVE<br/>C;<br/>BLD.CD14.<br/>MONO;<br/>BRN.NHA;<br/>SKIN.NHD<br/>FAD;<br/>SKIN.NHE<br/>K;<br/>LNG.NHLF<br/>;<br/>BONE.OST<br/>EO</p> <p><b>H3K27ac</b><br/>BLD.DND4<br/>1.CNCR;<br/>BLD.GM1<br/>2878;<br/>MUS.HSM<br/>M;<br/>MUS.HSM<br/>MT;<br/>BLD.CD14.<br/>MONO;<br/>LNG.NHLF<br/>;<br/>BONE.OST<br/>EO</p> |                                                                                                                                                       |                                                                                                 |                                                                                                                                        |
| rs1174<br>1255 | <p><b>15_EnhAF</b><br/>(LNG.IMR90; IPSC.20B; IPSC.18;<br/>ESDR.H1.NEUR.PROG; ESDR.H9.NEUR;<br/>ESDR.H1.MSC; BLD.PER.MONUC.PC;<br/>BLD.CD3.CPC; BLD.CD4.NPC;<br/>BLD.CD14.PC; BLD.CD19.CPC;<br/>BLD.CD34.PC; BLD.MOB.CD34.PC.M;<br/>BLD.MOB.CD34.PC.F; BLD.CD19.PPC;<br/>STRM.MRW.MSC;<br/>STRM.CHON.MRW.DR.MSC;<br/>FAT.ADIP.DR.MSC;</p>                                                                                                                                                                                                                                                                                                                                      | <p><b>17_EnhW2</b><br/>(LNG.A549.<br/>ETOH002.C<br/>NCR;<br/>CRVX.HEL<br/>A3.CNCR;<br/>MUS.HSM<br/>M;<br/>MUS.HSM<br/>MT;<br/>VAS.HUVEC</p>                                                                              | <p>LNG.IMR90; ESC.WA7; ESC.H9;<br/>ESC.I3; ESC.HUES6; ESC.HUES48;<br/>ESC.HUES64; ESC.H1; ESC.4STAR;<br/>IPSC.20B; IPSC.18; IPSC.15b;<br/>IPSC.DF.19.11;<br/>ESDR.H1.NEUR.PROG;<br/>ESDR.H9.NEUR.PROG;<br/>ESDR.H9.NEUR;<br/>ESDR.CD56.MESO;<br/>ESDR.CD56.ECTO;<br/>ESDR.CD184.ENDO;</p>                                                                                                                                                                                                                                                                                                                                                                                                                                                                                       | <p>BLD.CD4.CD25<br/>.CD127M.TRE<br/>GPC;<br/>FAT.MSC.DR.A<br/>DIP;<br/>SKIN.PEN.FRS<br/>K.FIB.02;<br/>GI.DUO.SM.M<br/>US;<br/>GI.CLN.MUC;<br/>GI.RECT.MUC.</p> | <p>ESC.H1; IPSC.20B;<br/>IPSC.DF.19.11;<br/>ESDR.H1.BMP4.TROP;<br/>BLD.PER.MONUC.PC;<br/>BLD.CD3.PPC;<br/>BLD.CD4.CD25I.CD127.TME<br/>MPC;<br/>BLD.CD4.CD25.CD127M.TRE<br/>GPC; BLD.CD4.CD25M.TPC;<br/>BLD.CD4.CD25M.CD45RA.N<br/>PC;</p>                                                                                                                                                                                                                                                     | <p>ESC.HUES6;<br/>ESC.H1;<br/>IPSC.20B;<br/>IPSC.15b;<br/>BLD.PER.MONU<br/>C.PC;<br/>BLD.CD4.NPC;<br/>BLD.CD8.NPC;<br/>STRM.MRW.MS<br/>C;<br/>STRM.CHON.M</p>                                                                                                                                                                                                                                        | <p><b>H3K4me1</b><br/>LNG.A549<br/>.ETOH002<br/>.CNCR;<br/>BLD.DND4<br/>1.CNCR;<br/>LIV.HEPG2<br/>.CNCR;<br/><b>BRST.HME<br/>C</b>;<br/>BLD.CD14.</p> | <p><b>H3K4me<br/>3</b><br/>LIV.HEP<br/>G2.CNCR</p> <p><b>H3K9ac</b><br/>BLD.DND<br/>41.CNCR</p> | <p>ROADMAP<br/>ESDR.H1.B<br/>MP4.MESO<br/>,<br/>ESDR.H1.M<br/>SC,<br/>BLD.CD3.PP<br/>C,<br/>BLD.MOB.C<br/>D34.PC.F,<br/>BLD.CD19.P</p> |

|                                                                                                                                                                                                                                                                                                                                                                                                                                                                                                                                                                                                                                                                                                                                                                                                                                                                                                                                                                                                                                                                                                                                                                                                                                                      |                                                                                                                                                                                                                                                                                                                           |                                                                                                                                                                                                                                                                                                                                                                                                                                                                                                                                                                                                                                                                                                                                                                                                                                                                                                                                                                                                                                                                                                                                                                                                                                                                                                                                                        |                                                           |                                                                                                                                                                                                                                                                                                                                                                                                                                                                                                                                                                                                                                                                                                                                                                                                                                                                                                                                                                 |                                                                                                                                                                                                                                                                                                                                                                                                                                                                  |                                                                                                                                                                                                                    |                                                       |                                                                       |
|------------------------------------------------------------------------------------------------------------------------------------------------------------------------------------------------------------------------------------------------------------------------------------------------------------------------------------------------------------------------------------------------------------------------------------------------------------------------------------------------------------------------------------------------------------------------------------------------------------------------------------------------------------------------------------------------------------------------------------------------------------------------------------------------------------------------------------------------------------------------------------------------------------------------------------------------------------------------------------------------------------------------------------------------------------------------------------------------------------------------------------------------------------------------------------------------------------------------------------------------------|---------------------------------------------------------------------------------------------------------------------------------------------------------------------------------------------------------------------------------------------------------------------------------------------------------------------------|--------------------------------------------------------------------------------------------------------------------------------------------------------------------------------------------------------------------------------------------------------------------------------------------------------------------------------------------------------------------------------------------------------------------------------------------------------------------------------------------------------------------------------------------------------------------------------------------------------------------------------------------------------------------------------------------------------------------------------------------------------------------------------------------------------------------------------------------------------------------------------------------------------------------------------------------------------------------------------------------------------------------------------------------------------------------------------------------------------------------------------------------------------------------------------------------------------------------------------------------------------------------------------------------------------------------------------------------------------|-----------------------------------------------------------|-----------------------------------------------------------------------------------------------------------------------------------------------------------------------------------------------------------------------------------------------------------------------------------------------------------------------------------------------------------------------------------------------------------------------------------------------------------------------------------------------------------------------------------------------------------------------------------------------------------------------------------------------------------------------------------------------------------------------------------------------------------------------------------------------------------------------------------------------------------------------------------------------------------------------------------------------------------------|------------------------------------------------------------------------------------------------------------------------------------------------------------------------------------------------------------------------------------------------------------------------------------------------------------------------------------------------------------------------------------------------------------------------------------------------------------------|--------------------------------------------------------------------------------------------------------------------------------------------------------------------------------------------------------------------|-------------------------------------------------------|-----------------------------------------------------------------------|
| <p>SKIN.PEN.FRSK.FIB.01;<br/>SKIN.PEN.FRSK.MEL.01;<br/>SKIN.PEN.FRSK.MEL.03;<br/>SKIN.PEN.FRSK.KER.03; <b>BRST.MYO</b>;<br/>BRN.GANGEM.DR.NRSPHR;<br/>BRN.CRTX.DR.NRSPHR; THYM;<br/>BRN.SUB.NIG; BRN.ANT.CAUD;<br/>BRN.CING.GYR; BRN.INF.TMP;<br/>BRN.ANG.GYR; BRN.DL.PRFRTNL.CRTX;<br/>BRN.GRM.MTRX; BRN.FET.F; BRN.FET.M;<br/>MUS.PSOAS; HRT.ATR.R; VAS.AOR;<br/>GI.ESO; GI.STMC.GAST; PLCNT.AMN;<br/>KID.FET; LNG.FET; OVRY; PANC.ISLT;<br/>PANC; LNG; SPLN)</p> <p><b>17_EnhW2</b><br/>(ESC.WA7; ESC.H9; ESC.I3; ESC.HUES48;<br/>ESC.HUES64; ESC.H1; ESC.4STAR;<br/>IPSC.15b; PSC.DF.6.9;<br/>ESDR.H9.NEUR.PROG;<br/>ESDR.CD56.MESO; ESDR.CD56.ECTO;<br/>ESDR.CD184.ENDO;<br/>ESDR.H1.BMP4.MESO; MUS.SAT;<br/>SKIN.PEN.FRSK.KER.02; <b>BRST.HMEC.35</b>)</p> <p><b>14_EnhA2</b><br/>(ESC.HUES6; IPSC.DF.19.11;<br/>ESDR.H1.BMP4.TROP)</p> <p><b>9_TxReg</b><br/>(BLD.CD3.PPC;<br/>BLD.CD4.CD25.CD127M.TREGPC;<br/>BLD.CD4.CD25M.TPC;<br/>BLD.CD4.CD25M.IL17M.PL.TPC;<br/>BLD.CD4.CD25M.CD45RO.MPC;<br/>BLD.CD4.MPC; BLD.CD56.PC; THYM.FET;<br/>GI.S.INT.FET)</p> <p><b>13_EnhA1</b><br/>(BLD.CD4.CD25I.CD127.TMEMPC;<br/>BLD.CD4.CD25M.IL17P.PL.TPC;<br/>BLD.CD8.NPC; BLD.CD34.CC;<br/>BLD.CD15.PC; FAT.MSC.DR.ADIP)</p> <p><b>10_TxEnh5</b></p> | <p>; BRN.NHA;<br/>SKIN.NHDF<br/>AD;<br/>LNG.NHLF)</p> <p><b>15_EnhAF</b><br/>(BLD.DND4<br/>1.CNCR;<br/>BLD.GM12<br/>878;<br/><b>BRST.HMEC</b><br/>;<br/>BLD.K562.C<br/>NCR;<br/>BLD.CD14.<br/>MONO;<br/>BONE.OSTE<br/>O)</p> <p><b>13_EnhA1</b><br/>(LIV.HEPG2.<br/>CNCR)</p> <p><b>14_EnhA2</b><br/>(SKIN.NHEK<br/>)</p> | <p>ESDR.H1.BMP4.TROP;<br/>ESDR.H1.MSC;<br/>BLD.PER.MONUC.PC;<br/>BLD.CD4.CD25I.CD127.TMEMPC;<br/>BLD.CD3.CPC;<br/>BLD.CD4.CD25.CD127M.TREGPC;<br/>BLD.CD4.CD25M.TPC;<br/>BLD.CD4.CD25M.CD45RA.NPC;<br/>BLD.CD4.CD25M.IL17M.PL.TPC;<br/>BLD.CD4.CD25M.IL17P.PL.TPC;<br/>BLD.CD4.CD25M.CD45RO.MPC;<br/>BLD.CD4.MPC; BLD.CD8.MPC;<br/>BLD.CD4.NPC; BLD.CD8.NPC;<br/>BLD.CD34.PC;<br/>BLD.MOB.CD34.PC.M;<br/>BLD.MOB.CD34.PC.F;<br/>BLD.CD34.CC; BLD.CD19.PPC;<br/>BLD.CD56.PC; BLD.CD15.PC;<br/>STRM.MRW.MSC;<br/>STRM.CHON.MRW.DR.MSC;<br/>FAT.ADIP.DR.MSC;<br/>FAT.MSC.DR.ADIP;<br/>SKIN.PEN.FRSK.FIB.01;<br/>SKIN.PEN.FRSK.FIB.02;<br/>SKIN.PEN.FRSK.KER.02;<br/><b>SKIN.PEN.FRSK.KER.03</b>;<br/><b>BRST.MYO</b>; THYM; THYM.FET;<br/>BRN.HIPP.MID; BRN.SUB.NIG;<br/>BRN.ANT.CAUD; BRN.CING.GYR;<br/>BRN.INF.TMP; BRN.ANG.GYR;<br/>BRN.DL.PRFRTNL.CRTX;<br/>FAT.ADIP.NUC; MUS.PSOAS;<br/>MUS.SKLT.F; MUS.SKLT.M;<br/>MUS.TRNK.FET; MUS.LEG.FET;<br/>HRT.FET; HRT.ATR.R; HRT.VENT.L;<br/>HRT.VNT.R; GI.DUO.SM.MUS;<br/>GI.CLN.SM.MUS;<br/>GI.RECT.SM.MUS; GI.STMC.MUS;<br/>GI.STMC.FET; GI.S.INT.FET;<br/>GI.L.INT.FET; GI.S.INT; GI.CLN.SIG;<br/>GI.CLN.MUC; GI.RECT.MUC.29;<br/>GI.RECT.MUC.31; GI.STMC.MUC;<br/>GI.DUO.MUC; GI.ESO;<br/>GI.STMC.GAST; PLCNT.AMN;<br/>LNG.FET; OVRY; ADRL.GLND.FET;<br/>PLCNT.FET; LIV.ADLT; PANC; LNG;<br/>SPLN</p> | <p>31;<br/>GI.STMC.MUC<br/>;<br/>GI.DUO.MUC;<br/>SPLN</p> | <p>BLD.CD4.CD25M.IL17M.PL.T<br/>PC;<br/>BLD.CD4.CD25M.IL17P.PL.T<br/>PC;<br/>BLD.CD4.CD25M.CD45RO.M<br/>PC; BLD.CD4.MPC;<br/>BLD.CD8.MPC;<br/>BLD.CD4.NPC;<br/>BLD.CD8.NPC; BLD.CD14.PC;<br/>BLD.MOB.CD34.PC.F;<br/>BLD.CD19.PPC;<br/>BLD.CD56.PC;<br/>SKIN.PEN.FRSK.FIB.01;<br/>SKIN.PEN.FRSK.FIB.02;<br/>SKIN.PEN.FRSK.MEL.01;<br/>SKIN.PEN.FRSK.MEL.03;<br/>THYM; THYM.FET;<br/>BRN.HIPP.MID;<br/>BRN.SUB.NIG;<br/>BRN.ANT.CAUD;<br/>BRN.CING.GYR;<br/>BRN.INF.TMP;<br/>BRN.ANG.GYR;<br/>BRN.DL.PRFRTNL.CRTX;<br/>FAT.ADIP.NUC; MUS.PSOAS;<br/>MUS.SKLT.F;<br/>MUS.TRNK.FET;<br/>MUS.LEG.FET; HRT.ATR.R;<br/>HRT.VENT.L; HRT.VNT.R;<br/>GI.DUO.SM.MUS;<br/>GI.CLN.SM.MUS;<br/>GI.RECT.SM.MUS;<br/>GI.STMC.MUS;<br/>GI.STMC.FET; GI.S.INT.FET;<br/>GI.L.INT.FET; GI.S.INT;<br/>GI.CLN.SIG; GI.CLN.MUC;<br/>GI.RECT.MUC.29;<br/>GI.RECT.MUC.31; GI.ESO;<br/>GI.STMC.GAST; PLCNT.AMN;<br/>OVRY; ADRL.GLND.FET;<br/>PLCNT.FET; LIV.ADLT; PANC;<br/>LNG; SPLN</p> | <p>RW.DR.MSC;<br/>FAT.ADIP.DR.M<br/>SC;<br/>FAT.MSC.DR.AD<br/>IP;<br/>BRN.SUB.NIG;<br/>BRN.ANT.CAUD<br/>;<br/>BRN.CING.GYR;<br/>BRN.INF.TMP;<br/>BRN.ANG.GYR;<br/>BRN.DL.PRFRTN<br/>L.CRTX;<br/>FAT.ADIP.NUC;<br/>MUS.SKLT.F;<br/>MUS.SKLT.M;<br/>HRT.FET;<br/>GI.DUO.SM.MU<br/>S;<br/>GI.CLN.SM.MUS<br/>;<br/>GI.RECT.SM.MU<br/>S; GI.CLN.MUC;<br/>GI.RECT.MUC.2<br/>9;<br/>GI.RECT.MUC.3<br/>1;<br/>GI.STMC.MUC;<br/>GI.DUO.MUC;<br/>LNG.FET;<br/>LIV.ADLT</p> | <p>MONO;<br/>SKIN.NHD<br/>FAD;<br/>SKIN.NHE<br/>K;<br/>LNG.NHLF<br/>;<br/>BONE.OST<br/>EO</p> <p><b>H3K27ac</b><br/>BLD.DND4<br/>1.CNCR;<br/>BLD.GM1<br/>2878;<br/>LIV.HEPG2<br/>.CNCR;<br/>BLD.CD14.<br/>MONO</p> | <p>; LIV.HEP<br/>G2.CNCR<br/>;<br/>SKIN.NH<br/>EK</p> | <p>PC,<br/>GI.L.INT.FE<br/>T</p> <p>ENCODE<br/>BLD.CD14.<br/>MONO</p> |
|------------------------------------------------------------------------------------------------------------------------------------------------------------------------------------------------------------------------------------------------------------------------------------------------------------------------------------------------------------------------------------------------------------------------------------------------------------------------------------------------------------------------------------------------------------------------------------------------------------------------------------------------------------------------------------------------------------------------------------------------------------------------------------------------------------------------------------------------------------------------------------------------------------------------------------------------------------------------------------------------------------------------------------------------------------------------------------------------------------------------------------------------------------------------------------------------------------------------------------------------------|---------------------------------------------------------------------------------------------------------------------------------------------------------------------------------------------------------------------------------------------------------------------------------------------------------------------------|--------------------------------------------------------------------------------------------------------------------------------------------------------------------------------------------------------------------------------------------------------------------------------------------------------------------------------------------------------------------------------------------------------------------------------------------------------------------------------------------------------------------------------------------------------------------------------------------------------------------------------------------------------------------------------------------------------------------------------------------------------------------------------------------------------------------------------------------------------------------------------------------------------------------------------------------------------------------------------------------------------------------------------------------------------------------------------------------------------------------------------------------------------------------------------------------------------------------------------------------------------------------------------------------------------------------------------------------------------|-----------------------------------------------------------|-----------------------------------------------------------------------------------------------------------------------------------------------------------------------------------------------------------------------------------------------------------------------------------------------------------------------------------------------------------------------------------------------------------------------------------------------------------------------------------------------------------------------------------------------------------------------------------------------------------------------------------------------------------------------------------------------------------------------------------------------------------------------------------------------------------------------------------------------------------------------------------------------------------------------------------------------------------------|------------------------------------------------------------------------------------------------------------------------------------------------------------------------------------------------------------------------------------------------------------------------------------------------------------------------------------------------------------------------------------------------------------------------------------------------------------------|--------------------------------------------------------------------------------------------------------------------------------------------------------------------------------------------------------------------|-------------------------------------------------------|-----------------------------------------------------------------------|

|                        |                                                                                                                                                                                                                                                                                                                                                                                                                                                                                          |                                                                                                                                                                      |                                                                                                                                                                                                                                                                                                                                                                                                                                                                                                                                                                                                                                                                     |                                                      |                                                                                                                                                                                                                                                                                                                                                 |                                                                                                                                                |                                                                                                                                                                                                                                                                                            |                                                                                                                                                                                                                                 |                          |
|------------------------|------------------------------------------------------------------------------------------------------------------------------------------------------------------------------------------------------------------------------------------------------------------------------------------------------------------------------------------------------------------------------------------------------------------------------------------------------------------------------------------|----------------------------------------------------------------------------------------------------------------------------------------------------------------------|---------------------------------------------------------------------------------------------------------------------------------------------------------------------------------------------------------------------------------------------------------------------------------------------------------------------------------------------------------------------------------------------------------------------------------------------------------------------------------------------------------------------------------------------------------------------------------------------------------------------------------------------------------------------|------------------------------------------------------|-------------------------------------------------------------------------------------------------------------------------------------------------------------------------------------------------------------------------------------------------------------------------------------------------------------------------------------------------|------------------------------------------------------------------------------------------------------------------------------------------------|--------------------------------------------------------------------------------------------------------------------------------------------------------------------------------------------------------------------------------------------------------------------------------------------|---------------------------------------------------------------------------------------------------------------------------------------------------------------------------------------------------------------------------------|--------------------------|
|                        | (BLD.CD4.CD25M.CD45RA.NPC;<br>BLD.CD8.MPC)<br><br><b>14_EnhA2</b><br>(SKIN.PEN.FRSK.FIB.02; MUS.LEG.FET;<br>HRT.FET)<br><br><b>13_EnhA1</b><br>(BRN.HIPP.MID; FAT.ADIP.NUC;<br>MUS.SKLT.F; MUS.SKLT.M;<br>MUS.TRNK.FET; HRT.VENT.L; HRT.VNT.R;<br>GI.DUO.SM.MUS; GI.CLN.SM.MUS;<br>GI.RECT.SM.MUS; GI.STMC.MUS;<br>GI.STMC.FET; GI.L.INT.FET; GI.S.INT;<br>GI.CLN.SIG; GI.CLN.MUC;<br>GI.RECT.MUC.29; GI.RECT.MUC.31;<br>GI.STMC.MUC; GI.DUO.MUC;<br>ADRL.GLND.FET; PLCNT.FET; LIV.ADLT) |                                                                                                                                                                      |                                                                                                                                                                                                                                                                                                                                                                                                                                                                                                                                                                                                                                                                     |                                                      |                                                                                                                                                                                                                                                                                                                                                 |                                                                                                                                                |                                                                                                                                                                                                                                                                                            |                                                                                                                                                                                                                                 |                          |
| <b>rs1702<br/>4629</b> | <b>14_EnhA2</b><br>(FAT.ADIP.DR.MSC); 17_EnhW2<br>(STRM.CHON.MRW.DR.MSC;<br>FAT.MSC.DR.ADIP;<br>SKIN.PEN.FRSK.FIB.02; BRN.ANT.CAUD;<br>FAT.ADIP.NUC;<br>GI.DUO.SM.MUS; GI.STMC.MUC;<br>GI.DUO.MUC)<br><br><b>18_EnhAc</b><br>(SKIN.PEN.FRSK.FIB.01)                                                                                                                                                                                                                                      | <b>13_EnhA2</b><br>(CRVX.HELA<br>S3.CNCR);<br>14_EnhA2<br>(LNG.A549.<br>ETOH002.C<br>NCR;<br>LIV.HEPG2.<br>CNCR);<br>17EnhW2<br>(SKIN.NHDF<br>AD;<br>BONE.OSTE<br>O) | LNG.IMR90; ESC.WA7; ESC.I3;<br>ESC.HUES6; ESC.4STAR; IPSC.20B;<br>IPSC.18; IPSC.15b; IPSC.DF.19.11;<br>ESDR.CD56.ECTO;<br>ESDR.CD184.ENDO; BLD.CD3.PPC;<br>BLD.CD4.CD25I.CD127.TMEMPC;<br>BLD.MOB.CD34.PC.F;<br>STRM.MRW.MSC;<br>FAT.ADIP.DR.MSC;<br>FAT.MSC.DR.ADIP; MUS.SAT;<br>SKIN.PEN.FRSK.FIB.01;<br>SKIN.PEN.FRSK.FIB.02;<br>BRN.HIPP.MID; BRN.ANT.CAUD;<br>BRN.ANG.GYR; BRN.GRM.MTRX;<br>FAT.ADIP.NUC; MUS.TRNK.FET;<br>MUS.LEG.FET; HRT.ATR.R;<br>HRT.VENT.L; HRT.VNT.R;<br>GI.DUO.SM.MUS;<br>GI.CLN.SM.MUS; GI.STMC.MUS;<br>GI.STMC.FET; GI.S.INT.FET;<br>GI.L.INT.FET; GI.S.INT;<br>GI.CLN.MUC; GI.RECT.MUC.29;<br>GI.STMC.MUC; GI.DUO.MUC;<br>PLCNT.AMN | ESC.WA7;<br>SKIN.PEN.FR<br>K.FIB.02;<br>GI.STMC.MUS; | LNG.IMR90; ESC.HUES48;<br>ESC.H1; IPSC.20B;<br>IPSC.DF.19.11;<br>ESDR.CD56.MESO;<br>ESDR.H1.BMP4.MESO;<br>ESDR.H1.MSC;<br>BLD.CD4.CD25I.CD127.TME<br>MPC; SKIN.PEN.FRSK.FIB.02;<br>BRN.ANT.CAUD;<br>BRN.CING.GYR;<br>BRN.INF.TMP;<br>FAT.ADIP.NUC; HRT.ATR.R;<br>GI.DUO.SM.MUS;<br>GI.RECT.SM.MUS;<br>GI.STMC.MUS; GI.S.INT;<br>GI.CLN.SIG; LNG | ESC.HUES6;<br>IPSC.15b;<br>BLD.PER.MONU<br>C.PC;<br>BRN.CING.GYR;<br>BRN.ANG.GYR;<br>MUS.SKLT.M;<br>GI.STMC.MUS;<br>GI.STMC.MUC;<br>GI.DUO.MUC | <b>H3K4me1</b><br>(LNG.A54<br>9.ETOH00<br>2.CNCR;<br>CRVX.HEL<br>AS3.CNCR<br>;<br>LIV.HEPG2<br>.CNCR;<br>MUS.HSM<br>MT;<br>SKIN.NHD<br>FAD;<br>LNG.NHLF<br>;<br>BONE.OST<br>EO)<br><br><b>H3K27ac</b><br>LNG.A549<br>.ETOH002<br>.CNCR;<br>CRVX.HEL<br>AS3.CNCR<br>;<br>LIV.HEPG2<br>.CNCR | <b>H3K4me<br/>3</b><br>LNG.A54<br>9.ETOH0<br>02.CNCR<br>;<br>CRVX.HE<br>LAS3.CN<br>CR;<br>LIV.HEP<br>G2.CNCR<br><br><b>H3K9ac</b><br>LNG.A54<br>9.ETOH0<br>02.CNCR<br>;<br>CRVX.HE<br>LAS3.CN<br>CR;<br>LIV.HEP<br>G2.CNCR<br>; | SKIN.PEN.F<br>RSK.FIB.01 |



|              |                                                                                                                                                                                                                                                                                                                                                                                                                                                                                                                                                                                                                                            |                                                                 |                                                                                                                                                                                                                                                                                                                                                                                                                                                                                                                                                                                                                                                                                                                                                                                                       |                                                                                                                                                                                                                                                                                                                                                                                                                                                                                                                                                                                                                                                                                                                       |                                                                                                                                                                                                                                                                                                                                                                                                                                                                                                                                                                                                                                                                                                                                   |                                                                                                                                                                                                                                                                                                                                                               |                                                                                                                                                                                                   |                                                                                                                                                                                                                                                                                                                                                                                                                                                                                        |  |
|--------------|--------------------------------------------------------------------------------------------------------------------------------------------------------------------------------------------------------------------------------------------------------------------------------------------------------------------------------------------------------------------------------------------------------------------------------------------------------------------------------------------------------------------------------------------------------------------------------------------------------------------------------------------|-----------------------------------------------------------------|-------------------------------------------------------------------------------------------------------------------------------------------------------------------------------------------------------------------------------------------------------------------------------------------------------------------------------------------------------------------------------------------------------------------------------------------------------------------------------------------------------------------------------------------------------------------------------------------------------------------------------------------------------------------------------------------------------------------------------------------------------------------------------------------------------|-----------------------------------------------------------------------------------------------------------------------------------------------------------------------------------------------------------------------------------------------------------------------------------------------------------------------------------------------------------------------------------------------------------------------------------------------------------------------------------------------------------------------------------------------------------------------------------------------------------------------------------------------------------------------------------------------------------------------|-----------------------------------------------------------------------------------------------------------------------------------------------------------------------------------------------------------------------------------------------------------------------------------------------------------------------------------------------------------------------------------------------------------------------------------------------------------------------------------------------------------------------------------------------------------------------------------------------------------------------------------------------------------------------------------------------------------------------------------|---------------------------------------------------------------------------------------------------------------------------------------------------------------------------------------------------------------------------------------------------------------------------------------------------------------------------------------------------------------|---------------------------------------------------------------------------------------------------------------------------------------------------------------------------------------------------|----------------------------------------------------------------------------------------------------------------------------------------------------------------------------------------------------------------------------------------------------------------------------------------------------------------------------------------------------------------------------------------------------------------------------------------------------------------------------------------|--|
| rs5383<br>88 | <p><b>11_TxEnh3</b><br/>(ESDR.H1.NEUR.PROG;<br/>SKIN.PEN.FRSK.FIB.01;<br/>SKIN.PEN.FRSK.MEL.01;<br/>SKIN.PEN.FRSK.MEL.03;<br/>SKIN.PEN.FRSK.KER.02;<br/>BRN.GANGEM.DR.NRSPHR;<br/>BRN.CRTX.DR.NRSPHR; BRN.HIPP.MID;<br/>BRN.SUB.NIG; BRN.ANT.CAUD;<br/>BRN.CING.GYR; BRN.ANG.GYR;<br/>BRN.DL.PRFRTL.CRTX;<br/>BRN.GRM.MTRX; BRN.FET.F; BRN.FET.M;<br/>MUS.SKLT.F; MUS.SKLT.M;<br/>MUS.LEG.FET; GI.DUO.SM.MUS;<br/>GI.CLN.SM.MUS; GI.STMC.MUS;<br/>GI.STMC.FET; GI.S.INT.FET; GI.L.INT.FET;<br/>PLCNT.AMN; LNG.FET; ADRL.GLND.FET;<br/>PLCNT.FET; SPLN)</p> <p><b>9_TxReg</b><br/>(SKIN.PEN.FRSK.FIB.02; BRN.INF.TMP;<br/>MUS.TRNK.FET)</p> | <p><b>11_TxEnh3</b><br/>(MUS.HSM<br/>M;<br/>MUS.HSM<br/>MT)</p> | <p>ESC.WA7; IPSC.DF.19.11;<br/>ESDR.H1.NEUR.PROG;<br/>ESDR.H1.BMP4.TROP;<br/>ESDR.H1.MSC; BLD.CD3.PPC;<br/>BLD.CD4.CD25I.CD127.TMEMPC;<br/>BLD.CD3.CPC; BLD.CD4.CD25.<br/>BLD.CD34.CC;<br/>SKIN.PEN.FRSK.FIB.01;<br/>SKIN.PEN.FRSK.FIB.02;<br/>SKIN.PEN.FRSK.MEL.01;<br/><b>BRST.MYO;</b><br/>BRN.GANGEM.DR.NRSPHR;<br/>BRN.CRTX.DR.NRSPHR;<br/>BRN.HIPP.MID; BRN.SUB.NIG;<br/>BRN.ANT.CAUD; BRN.CING.GYR;<br/>BRN.INF.TMP; BRN.ANG.GYR;<br/>BRN.DL.PRFRTL.CRTX;<br/>BRN.GRM.MTRX; BRN.FET.M;<br/>MUS.SKLT.M; MUS.TRNK.FET;<br/>MUS.LEG.FET; HRT.ATR.R;<br/>HRT.VNT.R; GI.DUO.SM.MUS;<br/>GI.STMC.MUS; GI.STMC.FET;<br/>GI.S.INT.FET; GI.L.INT.FET;<br/>GI.CLN.MUC; GI.RECT.MUC.29;<br/>GI.RECT.MUC.31; GI.STMC.MUC;<br/>GI.DUO.MUC; GI.ESO;<br/>GI.STMC.GAST; ADRL.GLND.FET;<br/>PANC; LNG; SPLN</p> | <p>ESC.H9;<br/>IPSC.DF.19.11;<br/>ESDR.H1.NEU<br/>R.PROG;<br/>ESDR.H1.MSC;<br/>SKIN.PEN.FR<br/>S.K.FIB.01;<br/>SKIN.PEN.FR<br/>S.K.FIB.02;<br/>SKIN.PEN.FR<br/>S.K.MEL.01;<br/>BRN.GANGEM<br/>.DR.NRSPHR;<br/>BRN.GRM.MT<br/>RX; BRN.FET.F;<br/>BRN.FET.M;<br/>FAT.ADIP.NUC<br/>; MUS.PSOAS;<br/>MUS.SKLT.F;<br/>MUS.SKLT.M;<br/>MUS.TRNK.FE<br/>T;<br/>MUS.LEG.FET;<br/>HRT.FET;<br/>HRT.ATR.R;<br/>HRT.VENT.L;<br/>HRT.VNT.R;<br/>VAS.AOR;<br/>GI.DUO.SM.M<br/>US;<br/>GI.CLN.SM.M<br/>US;<br/>GI.RECT.SM.M<br/>US;<br/>GI.STMC.MUS;<br/>GI.STMC.FET;<br/>GI.S.INT.FET;<br/>GI.L.INT.FET;<br/>GI.S.INT;<br/>GI.CLN.SIG;<br/>GI.CLN.MUC;<br/>GI.RECT.MUC.<br/>29;<br/>GI.RECT.MUC.<br/>31;<br/>GI.STMC.MUC<br/>;</p> | <p>ESC.H9; IPSC.20B;<br/>IPSC.DF.19.11;<br/>ESDR.H1.NEUR.PROG;<br/>ESDR.CD56.MESO;<br/>ESDR.CD56.ECTO;<br/>ESDR.CD184.ENDO;<br/>BLD.CD4.CD25I.CD127.TME<br/>MPC;<br/>BLD.CD4.CD25M.CD45RA.N<br/>PC;<br/>BLD.CD4.CD25M.IL17M.PL.T<br/>PC;<br/>BLD.CD4.CD25M.IL17P.PL.T<br/>PC;<br/>BLD.CD4.CD25M.CD45RO.M<br/>PC; BLD.MOB.CD34.PC.F;<br/>SKIN.PEN.FRSK.FIB.01;<br/>SKIN.PEN.FRSK.FIB.02;<br/>SKIN.PEN.FRSK.MEL.01;<br/>BRN.HIPP.MID;<br/>BRN.SUB.NIG;<br/>BRN.ANT.CAUD;<br/>BRN.CING.GYR;<br/>BRN.INF.TMP;<br/>BRN.ANG.GYR;<br/>BRN.DL.PRFRTL.CRTX;<br/>MUS.TRNK.FET;<br/>MUS.LEG.FET;<br/>GI.CLN.SM.MUS;<br/>GI.STMC.MUS;<br/>GI.STMC.FET; GI.S.INT.FET;<br/>GI.L.INT.FET; GI.S.INT;<br/>GI.ESO; ADRL.GLND.FET;<br/>LNG; SPLN</p> | <p>LNG.IMR90;<br/>ESC.HUES6;<br/>IPSC.15b;<br/>ESDR.H1.NEUR.<br/>PROG;<br/>SDR.H1.MSC;<br/>STRM.CHON.M<br/>RW.DR.MSC;<br/>BRN.SUB.NIG;<br/>BRN.ANT.CAUD<br/>;<br/>BRN.CING.GYR;<br/>BRN.INF.TMP;<br/>BRN.ANG.GYR;<br/>BRN.DL.PRFRTL<br/>L.CRTX;<br/>MUS.SKLT.M;<br/>GI.STMC.MUS;<br/>GI.RECT.MUC.3<br/>1;<br/>GI.STMC.MUC;<br/>GI.DUO.MUC;<br/>PANC.ISLT;</p> | <p><b>H3K4me1</b><br/>LNG.A549<br/>.ETOH002<br/>.CNCR;<br/>MUS.HSM<br/>M;<br/>MUS.HSM<br/>MT;<br/><b>H3K27ac</b><br/>MUS.HSM<br/>MT;<br/>BLD.CD14.<br/>MONO;<br/>BRN.NHA;<br/>BONE.OST<br/>EO</p> | <p><b>H3K4me3</b><br/>LNG.A54<br/>9.ETOH0<br/>02.CNCR<br/>;<br/>BLD.DND<br/>41.CNCR<br/>;<br/>BLD.GM<br/>12878;<br/>CRVX.HE<br/>LAS3.CN<br/>CR;<br/>LIV.HEP<br/>G2.CNCR<br/>;<br/><b>BRST.H<br/>MEC;</b><br/>MUS.HS<br/>MM;<br/>MUS.HS<br/>MMT;<br/>VAS.HUV<br/>EC;<br/>BLD.K56<br/>2.CNCR;<br/>BLD.CD1<br/>4.MONO<br/>;<br/>BRN.NH<br/>A;<br/>SKIN.NH<br/>DFAD;<br/>SKIN.NH<br/>EK;<br/>LNG.NHL<br/>F;<br/>BONE.O<br/>STEO<br/><br/><b>H3K9ac</b><br/>CRVX.HE<br/>LAS3.CN<br/>CR;</p> |  |
|--------------|--------------------------------------------------------------------------------------------------------------------------------------------------------------------------------------------------------------------------------------------------------------------------------------------------------------------------------------------------------------------------------------------------------------------------------------------------------------------------------------------------------------------------------------------------------------------------------------------------------------------------------------------|-----------------------------------------------------------------|-------------------------------------------------------------------------------------------------------------------------------------------------------------------------------------------------------------------------------------------------------------------------------------------------------------------------------------------------------------------------------------------------------------------------------------------------------------------------------------------------------------------------------------------------------------------------------------------------------------------------------------------------------------------------------------------------------------------------------------------------------------------------------------------------------|-----------------------------------------------------------------------------------------------------------------------------------------------------------------------------------------------------------------------------------------------------------------------------------------------------------------------------------------------------------------------------------------------------------------------------------------------------------------------------------------------------------------------------------------------------------------------------------------------------------------------------------------------------------------------------------------------------------------------|-----------------------------------------------------------------------------------------------------------------------------------------------------------------------------------------------------------------------------------------------------------------------------------------------------------------------------------------------------------------------------------------------------------------------------------------------------------------------------------------------------------------------------------------------------------------------------------------------------------------------------------------------------------------------------------------------------------------------------------|---------------------------------------------------------------------------------------------------------------------------------------------------------------------------------------------------------------------------------------------------------------------------------------------------------------------------------------------------------------|---------------------------------------------------------------------------------------------------------------------------------------------------------------------------------------------------|----------------------------------------------------------------------------------------------------------------------------------------------------------------------------------------------------------------------------------------------------------------------------------------------------------------------------------------------------------------------------------------------------------------------------------------------------------------------------------------|--|

|              |                                                                                                                                                                                                                                                                                 |                                                                                                                                                          |                                                                                                                                                                                                                                                                                                                                                                                   |                                                                                                                                                                           |                                                                                                                                                                                                                                                                                                                                                                                          |                                                                                                                                                                     |                                                                                                                          |                                                                                                                                                                                                                                  |  |
|--------------|---------------------------------------------------------------------------------------------------------------------------------------------------------------------------------------------------------------------------------------------------------------------------------|----------------------------------------------------------------------------------------------------------------------------------------------------------|-----------------------------------------------------------------------------------------------------------------------------------------------------------------------------------------------------------------------------------------------------------------------------------------------------------------------------------------------------------------------------------|---------------------------------------------------------------------------------------------------------------------------------------------------------------------------|------------------------------------------------------------------------------------------------------------------------------------------------------------------------------------------------------------------------------------------------------------------------------------------------------------------------------------------------------------------------------------------|---------------------------------------------------------------------------------------------------------------------------------------------------------------------|--------------------------------------------------------------------------------------------------------------------------|----------------------------------------------------------------------------------------------------------------------------------------------------------------------------------------------------------------------------------|--|
|              |                                                                                                                                                                                                                                                                                 |                                                                                                                                                          |                                                                                                                                                                                                                                                                                                                                                                                   | GI.DUO.MUC;<br>GI.ESO;<br>GI.STMC.GAST<br>; PLCNT.AMN;<br>KID.FET;<br>LNG.FET;<br>OVRY;<br>PANC.ISLT;<br>ADRL.GLND.FE<br>T; PLCNT.FET;<br>LIV.ADLT;<br>PANC; LNG;<br>SPLN |                                                                                                                                                                                                                                                                                                                                                                                          |                                                                                                                                                                     |                                                                                                                          |                                                                                                                                                                                                                                  |  |
| rs5606<br>74 | <b>11_TxEnh3</b><br>(LNG.IMR90; ESDR.CD56.MESO;<br>ESDR.H1.BMP4.TROP;<br>SKIN.PEN.FRSK.MEL.01; <b>BRST.HMEC.35</b> )<br><br><b>10_TxEnh5</b><br>(ESDR.H1.MSC; SKIN.PEN.FRSK.FIB.01;<br>SKIN.PEN.FRSK.FIB.02;<br>SKIN.PEN.FRSK.KER.03)                                           | <b>11_TxEnh3</b><br>(LNG.A549.<br>ETOHO02.C<br>NCR;<br>VAS.HUVEC<br>;<br>SKIN.NHEK;<br>LNG.NHLF;<br>BONE.OSTE<br>O)<br><br><b>10_TxEnh5</b><br>(BRN.NHA) | LNG.IMR90; IPSC.15b;<br>IPSC.DF.19.11;<br>ESDR.H1.BMP4.TROP;<br>ESDR.H1.MSC; BLD.CD3.PPC;<br>SKIN.PEN.FRSK.FIB.01;<br>SKIN.PEN.FRSK.FIB.02;<br>SKIN.PEN.FRSK.MEL.01;<br>SKIN.PEN.FRSK.KER.02;<br>SKIN.PEN.FRSK.KER.03;<br><b>BRST.HMEC.35; BRST.MYO;</b><br>BRN.ANT.CAUD;<br>BRN.DL.PRFRTL.CRTX;<br>MUS.TRNK.FET; HRT.VNT.R;<br>GI.RECT.MUC.29; GI.STMC.GAST;<br>PLCNT.AMN; PANC; | IPSC.DF.19.11;<br>SKIN.PEN.FR<br>K.FIB.01;<br>SKIN.PEN.FR<br>K.FIB.02;<br>SKIN.PEN.FR<br>K.MEL.01;<br>SPLN                                                                | ESC.HUES48; IPSC.20B;<br>ESDR.CD184.ENDO;<br>ESDR.H1.MSC;<br>BLD.CD4.CD25I.CD127.TME<br>MPC;<br>BLD.CD4.CD25M.CD45RO.M<br>PC; BLD.MOB.CD34.PC.F;<br>SKIN.PEN.FRSK.FIB.01;<br>SKIN.PEN.FRSK.FIB.02;<br>SKIN.PEN.FRSK.MEL.01;<br>BRN.HIPP.MID;<br>BRN.ANT.CAUD;<br>BRN.CING.GYR;<br>BRN.INF.TMP;<br>BRN.ANG.GYR;<br>BRN.DL.PRFRTL.CRTX;<br>HRT.VNT.R; GI.STMC.MUS;<br>PANC.ISLT; LNG; SPLN | LNG.IMR90;<br>ESC.HUES6;<br>ESDR.H1.NEUR.<br>PROG;<br>STRM.CHON.M<br>RW.DR.MSC;<br>BRN.ANT.CAUD<br>;<br>BRN.CING.GYR;<br>BRN.ANG.GYR;<br>GI.STMC.MUS;<br>PANC.ISLT; | <b>H3K4me1</b><br><b>BRST.HME</b><br><b>C;</b><br><br><b>H3K27ac</b><br>BLD.CD14.<br>MONO;<br>BRN.NHA;<br>BONE.OST<br>EO | <b>H3K4me</b><br><b>3</b><br>IPSC.DF.<br>19.11;<br>SKIN.PE<br>N.FRSK.F<br>IB.01;<br>SKIN.PE<br>N.FRSK.F<br>IB.02;<br>SKIN.PE<br>N.FRSK.<br>MEL.01;<br>SPLN<br><br><b>H3K9ac</b><br><br>CRVX.HE<br>LAS3.CN<br>CR;<br>BRN.NH<br>A; |  |
| rs5686<br>86 | <b>11_TxEnh3</b><br>(IPSC.15b; ESDR.H1.NEUR.PROG;<br>SKIN.PEN.FRSK.FIB.01;<br>SKIN.PEN.FRSK.FIB.02;<br>SKIN.PEN.FRSK.MEL.01;<br>SKIN.PEN.FRSK.KER.02;<br>BRN.GANGEM.DR.NRSPHR;<br>BRN.CRTX.DR.NRSPHR; BRN.HIPP.MID;<br>BRN.SUB.NIG; BRN.ANT.CAUD;<br>BRN.CING.GYR; BRN.INF.TMP; | None                                                                                                                                                     | ESC.WA7; ESC.4STAR; PSC.DF.6.9;<br>IPSC.DF.19.11;<br>ESDR.H1.NEUR.PROG;<br>ESDR.H1.MSC; BLD.CD3.PPC;<br>BLD.CD56.PC;<br>SKIN.PEN.FRSK.FIB.01;<br>SKIN.PEN.FRSK.FIB.02;<br>SKIN.PEN.FRSK.MEL.01;<br><b>BRST.MYO;</b><br>BRN.GANGEM.DR.NRSPHR;<br>BRN.CRTX.DR.NRSPHR;                                                                                                               | ESC.H9;<br>IPSC.DF.19.11;<br>ESDR.H1.NEU<br>R.PROG;<br>ESDR.H1.MSC;<br>SKIN.PEN.FR<br>K.FIB.01;<br>SKIN.PEN.FR<br>K.FIB.02;<br>SKIN.PEN.FR<br>K.MEL.01;                   | ESC.H9; IPSC.20B;<br>IPSC.DF.19.11;<br>ESDR.H1.NEUR.PROG;<br>ESDR.CD56.ECTO;<br>ESDR.CD184.ENDO;<br>BLD.CD4.CD25I.CD127.TME<br>MPC;<br>BLD.CD4.CD25M.CD45RO.M<br>PC; BLD.MOB.CD34.PC.F;<br>SKIN.PEN.FRSK.FIB.01;<br>SKIN.PEN.FRSK.FIB.02;                                                                                                                                                | LNG.IMR90;<br>ESC.HUES6;<br>IPSC.15b;<br>ESDR.H1.NEUR.<br>PROG;<br>STRM.CHON.M<br>RW.DR.MSC;<br>BRN.SUB.NIG;<br>BRN.ANT.CAUD<br>;<br>BRN.CING.GYR;                  | <b>H3K4me1</b><br>MUS.HSM<br>M;<br>MUS.HSM<br>MT;<br><br><b>H3K27ac</b><br>MUS.HSM<br>MT;<br>BLD.CD14.<br>MONO;          | <b>H3K4me</b><br><b>3</b><br>None<br><br><b>H3K9ac</b><br>None                                                                                                                                                                   |  |

|              |                                                                                                                                                                                       |                                                                                                                                                                                                                                                  |                                                                                                                                                                                                                                                                                                                                                                            |                                                                                                                                                       |                                                                                                                                                                                                                                                                                    |                                                                                                                                                                                                                                                                                          |                                                                                                                                                                                                                                                               |                                                                                                                                                                                                              |  |
|--------------|---------------------------------------------------------------------------------------------------------------------------------------------------------------------------------------|--------------------------------------------------------------------------------------------------------------------------------------------------------------------------------------------------------------------------------------------------|----------------------------------------------------------------------------------------------------------------------------------------------------------------------------------------------------------------------------------------------------------------------------------------------------------------------------------------------------------------------------|-------------------------------------------------------------------------------------------------------------------------------------------------------|------------------------------------------------------------------------------------------------------------------------------------------------------------------------------------------------------------------------------------------------------------------------------------|------------------------------------------------------------------------------------------------------------------------------------------------------------------------------------------------------------------------------------------------------------------------------------------|---------------------------------------------------------------------------------------------------------------------------------------------------------------------------------------------------------------------------------------------------------------|--------------------------------------------------------------------------------------------------------------------------------------------------------------------------------------------------------------|--|
|              | BRN.ANG.GYR; BRN.DL.PRFRTNL.CRTX;<br>BRN.GRM.MTRX; BRN.FET.F;<br>MUS.TRNK.FET; MUS.LEG.FET;<br>GI.STMC.FET; ADRL.GLND.FET; SPLN)                                                      |                                                                                                                                                                                                                                                  | BRN.HIPP.MID; BRN.SUB.NIG;<br>BRN.ANT.CAUD; BRN.INF.TMP;<br>BRN.DL.PRFRTNL.CRTX;<br>BRN.GRM.MTRX; MUS.SKLT.M;<br>MUS.TRNK.FET; MUS.LEG.FET;<br>HRT.ATR.R; HRT.VNT.R;<br>GI.DUO.SM.MUS; GI.STMC.MUS;<br>GI.STMC.FET; GI.S.INT.FET;<br>GI.CLN.MUC; GI.RECT.MUC.29;<br>GI.RECT.MUC.31; GI.STMC.MUC;<br>GI.DUO.MUC; GI.ESO;<br>GI.STMC.GAST; ADRL.GLND.FET;<br>PANC; LNG; SPLN | BRN.GRM.MT<br>RX;<br>GI.STMC.MUS;<br>GI.STMC.GAST<br>; SPLN                                                                                           | SKIN.PEN.FRSK.MEL.01;<br>BRN.HIPP.MID;<br>BRN.SUB.NIG;<br>BRN.ANT.CAUD;<br>BRN.CING.GYR;<br>BRN.INF.TMP;<br>BRN.ANG.GYR;<br>BRN.DL.PRFRTNL.CRTX;<br>MUS.TRNK.FET;<br>MUS.LEG.FET; HRT.VNT.R;<br>GI.CLN.SM.MUS;<br>GI.STMC.MUS;<br>GI.STMC.FET; GI.ESO;<br>ADRL.GLND.FET; LNG; SPLN | BRN.INF.TMP;<br>BRN.ANG.GYR;<br>BRN.DL.PRFRTNL.CRTX;<br>MUS.SKLT.M;<br>GI.STMC.MUS;<br>GI.STMC.MUC;<br>PANC.ISLT;<br>ADRL.GLND.FET<br>;                                                                                                                                                  | BRN.NHA;<br>BONE.OST<br>EO                                                                                                                                                                                                                                    |                                                                                                                                                                                                              |  |
| rs6043<br>37 | <b>17_EnhW2</b><br>(LNG.IMR90; ESDR.H1.MSC;<br>STRM.MRW.MSC;<br>STRM.CHON.MRW.DR.MSC;<br>FAT.ADIP.DR.MSC; FAT.MSC.DR.ADIP;<br>MUS.SAT; SKIN.PEN.FRSK.FIB.01;<br>SKIN.PEN.FRSK.FIB.02) | <b>16_EnhW1</b><br>(LNG.A549.<br>ETOH002.C<br>NCR;<br>BRN.NHA)<br><br><b>14_EnhA2</b><br>(CRVX.HELA<br>S3.CNCR;<br>BONE.OSTE<br>O)<br><br><b>17_EnhW2</b><br>(MUS.HSM<br>M;<br>MUS.HSM<br>MT;<br>VAS.HUVEC<br>;<br>SKIN.NHDF<br>AD;<br>LNG.NHLF) | LNG.IMR90; ESDR.H9.NEUR;<br>STRM.MRW.MSC;<br>STRM.CHON.MRW.DR.MSC;<br>FAT.ADIP.DR.MSC; MUS.SAT;<br>SKIN.PEN.FRSK.FIB.01;<br>BRN.CRTX.DR.NRSPHR;<br>BRN.HIPP.MID; BRN.CING.GYR;<br>BRN.DL.PRFRTNL.CRTX;<br>BRN.GRM.MTRX; VAS.AOR;<br>GI.DUO.SM.MUS; GI.S.INT.FET;<br>GI.S.INT                                                                                               | FAT.ADIP.DR.<br>MSC;<br>MUS.SAT;<br>BRN.HIPP.MID<br>;<br>BRN.CING.GYR<br>;<br>BRN.DL.PRFRTNL.CRTX;<br>GI.STMC.MUS;<br>LIV.ADLT;<br>PANC; LNG;<br>SPLN | BRN.SUB.NIG;<br>BRN.ANT.CAUD;<br>BRN.CING.GYR;<br>BRN.INF.TMP;<br>BRN.ANG.GYR;<br>BRN.DL.PRFRTNL.CRTX;<br>GI.CLN.SM.MUS;                                                                                                                                                           | BLD.PER.MONU<br>C.PC;<br>STRM.MRW.MS<br>C;<br>STRM.CHON.M<br>RW.DR.MSC;<br>FAT.ADIP.DR.M<br>SC;<br>FAT.MSC.DR.AD<br>IP; MUS.SAT;<br>BRN.SUB.NIG;<br>BRN.ANT.CAUD<br>; BRN.INF.TMP;<br>BRN.DL.PRFRTNL.CRTX;<br>MUS.SKLT.F;<br>MUS.SKLT.M;<br>GI.CLN.SM.MUS<br>; GI.STMC.MUS;<br>LIV.ADLT; | <b>H3K4me1</b><br>LNG.A549<br>.ETOH002<br>.CNCR;<br>CRVX.HEL<br>AS3.CNCR<br>;<br>MUS.HSM<br>M;<br>MUS.HSM<br>MT;<br>VAS.HUVE<br>C;<br>BRN.NHA;<br>SKIN.NHD<br>FAD;<br>LNG.NHLF<br>;<br>BONE.OST<br>EO<br><br><b>H3K27ac</b><br>LNG.A549<br>.ETOH002<br>.CNCR; | <b>H3K4me3</b><br>LNG.A54<br>9.ETOH0<br>02.CNCR<br>;<br>BRN.NH<br>A;<br>BONE.O<br>STEO<br><br><b>H3K9ac</b><br>LNG.A54<br>9.ETOH0<br>02.CNCR<br>;<br>MUS.HS<br>MM;<br>BLD.CD1<br>4.MONO<br>;<br>BRN.NH<br>A; |  |
| rs6694<br>26 | <b>19_DNase</b><br>(MUS.PSOAS; VAS.AOR; GI.L.INT.FET;<br>GI.CLN.SIG; GI.DUO.MUC;<br>GI.STMC.GAST; VAS.HUVEC;<br>BLD.K562.CNCR)                                                        | <b>19_DNase</b><br>(LNG.A549.<br>ETOH002.C<br>NCR;<br>LIV.HEPG2.                                                                                                                                                                                 | SKIN.PEN.FRSK.KER.03;<br><b>BRST.HMEC.35</b> ; BRN.ANT.CAUD;<br>GI.DUO.SM.MUS; GI.S.INT.FET;<br>GI.L.INT.FET; GI.S.INT;<br>GI.RECT.MUC.31; GI.STMC.MUC;<br>GI.DUO.MUC;                                                                                                                                                                                                     | BRN.ANG.GYR<br>;<br>GI.RECT.MUC.<br>29;<br>GI.DUO.MUC;                                                                                                | GI.S.INT.FET; GI.L.INT.FET;<br>GI.S.INT; OVRY;                                                                                                                                                                                                                                     | BLD.PER.MONU<br>C.PC;<br>BLD.CD4.NPC;<br>STRM.CHON.M<br>RW.DR.MSC;<br>FAT.MSC.DR.AD                                                                                                                                                                                                      | <b>H3K4me1</b><br>CRVX.HEL<br>AS3.CNCR<br>;<br><br><b>H3K27ac</b>                                                                                                                                                                                             | <b>H3K4me3</b><br>None<br><br><b>H3K9ac</b><br>None                                                                                                                                                          |  |

|               |                                                                                                                        |                                                                      |                                                                                                                                                                                                                                                                                                                                                                              |                                                                                                                                                                 |                                                                                                                                                                                                                                                                                                                                                                                                                                                                                                                                                                                                                                |                                                                                                                                                                             |                                                                                                                                                                   |                                                                                               |  |
|---------------|------------------------------------------------------------------------------------------------------------------------|----------------------------------------------------------------------|------------------------------------------------------------------------------------------------------------------------------------------------------------------------------------------------------------------------------------------------------------------------------------------------------------------------------------------------------------------------------|-----------------------------------------------------------------------------------------------------------------------------------------------------------------|--------------------------------------------------------------------------------------------------------------------------------------------------------------------------------------------------------------------------------------------------------------------------------------------------------------------------------------------------------------------------------------------------------------------------------------------------------------------------------------------------------------------------------------------------------------------------------------------------------------------------------|-----------------------------------------------------------------------------------------------------------------------------------------------------------------------------|-------------------------------------------------------------------------------------------------------------------------------------------------------------------|-----------------------------------------------------------------------------------------------|--|
|               | <b>17_EhW2</b><br>(GI.S.INT.FET; GI.S.INT; GI.STMC.MUC)                                                                | CNCR;<br>SKIN.NHEK)<br><br><b>18_EnhAc</b><br>(CRVX.HELA<br>S3.CNCR) |                                                                                                                                                                                                                                                                                                                                                                              |                                                                                                                                                                 |                                                                                                                                                                                                                                                                                                                                                                                                                                                                                                                                                                                                                                | IP; <b>BRST.MYO</b> ;<br>BRN.ANT.CAUD<br>;<br>BRN.CING.GYR;<br>BRN.INF.TMP;<br>BRN.ANG.GYR;<br>MUS.SKLT.F;<br>GI.CLN.SM.MUS<br>; GI.STMC.MUS;<br>GI.DUO.MUC;                | None                                                                                                                                                              |                                                                                               |  |
| rs8657<br>74  | <b>11_TxEnh3</b><br>(SKIN.PEN.FRSK.FIB.01; MUS.LEG.FET)<br><br><b>10_TxEnh5</b><br>(SKIN.PEN.FRSK.FIB.02; GI.STMC.FET) | None                                                                 | ESC.I3; IPSC.DF.19.11;<br>ESDR.H1.MSC; BLD.CD3.PPC;<br>BLD.CD8.MPC; BLD.CD56.PC;<br>SKIN.PEN.FRSK.FIB.01;<br>SKIN.PEN.FRSK.FIB.02;<br>SKIN.PEN.FRSK.MEL.01;<br>SKIN.PEN.FRSK.KER.03;<br>THYM.FET; BRN.ANG.GYR;<br>BRN.DL.PRFRTL.CRTX;<br>MUS.TRNK.FET; MUS.LEG.FET;<br>GI.STMC.MUS; GI.STMC.FET;<br>GI.RECT.MUC.29; GI.STMC.GAST;<br>PLCNT.AMN; ADRL.GLND.FET;<br>PLCNT.FET; | ESDR.H1.MSC;<br>SKIN.PEN.FR<br>K.FIB.01;<br>SKIN.PEN.FR<br>K.FIB.02;<br>SKIN.PEN.FR<br>K.MEL.01;<br><br>BRN.DL.PRF<br>NTL.CRTX;<br>GI.STMC.GAST<br>; PLCNT.AMN; | LNG.IMR90; IPSC.20B;<br>ESDR.CD184.ENDO;<br>BLD.CD3.PPC;<br>BLD.CD4.CD25I.CD127.TME<br>MPC; BLD.CD4.CD25M.TPC;<br>BLD.CD4.CD25M.CD45RA.N<br>PC;<br>BLD.CD4.CD25M.IL17M.PL.T<br>PC;<br>BLD.CD4.CD25M.CD45RO.M<br>PC; BLD.MOB.CD34.PC.F;<br>BLD.CD19.PPC;<br>SKIN.PEN.FRSK.FIB.01;<br>SKIN.PEN.FRSK.FIB.02;<br>SKIN.PEN.FRSK.MEL.01;<br>BRN.HIPP.MID;<br>BRN.SUB.NIG;<br>BRN.ANT.CAUD;<br>BRN.CING.GYR;<br>BRN.ANG.GYR;<br>BRN.DL.PRFRTL.CRTX;<br>MUS.LEG.FET; HRT.VNT.R;<br>GI.CLN.SM.MUS;<br>GI.STMC.MUS;<br>GI.STMC.FET;<br>GI.RECT.MUC.29; GI.ESO;<br>GI.STMC.GAST; PLCNT.AMN;<br>KID.FET; LNG.FET; OVRY;<br>PANC.ISLT; SPLN | ESC.HUES64;<br>IPSC.18;<br>IPSC.15b;<br>ESDR.H1.NEUR.<br>PROG;<br>BLD.CD4.NPC;<br>STRM.CHON.M<br>RW.DR.MSC;<br>BRN.SUB.NIG;<br>BRN.INF.TMP;<br>FAT.ADIP.NUC;<br>GI.CLN.MUC; | <b>H3K4me1</b><br>BLD.K562.<br>CNCR<br><br><b>H3K27ac</b><br>BLD.DND4<br>1.CNCR;<br>CRVX.HEL<br>AS3.CNCR<br>;<br>BLD.CD14.<br>MONO;<br>BRN.NHA;<br>BONE.OST<br>EO | <b>H3K4me<br/>3</b><br>None<br><br><b>H3K9ac</b><br>CRVX.HE<br>LAS3.CN<br>CR;<br>BRN.NH<br>A; |  |
| rs2781<br>814 | None                                                                                                                   | None                                                                 | BLD.CD4.CD25M.IL17P.PL.TPC;<br>BLD.CD8.NPC;<br>BRN.CRTX.DR.NRSPHR;<br>BRN.HIPP.MID; BRN.ANT.CAUD;<br>BRN.CING.GYR;<br>BRN.DL.PRFRTL.CRTX;<br>MUS.SKLT.F GI.DUO.SM.MUS;<br>GI.CLN.SM.MUS; GI.S.INT.FET;                                                                                                                                                                       | SKIN.PEN.FR<br>K.FIB.02;<br>BRN.ANG.GYR<br>; MUS.SKLT.F;<br>GI.DUO.SM.M<br>US;<br>GI.DUO.MUC;                                                                   | BRN.INF.TMP;<br>BRN.DL.PRFRTL.CRTX;<br>GI.DUO.SM.MUS; OVRY;                                                                                                                                                                                                                                                                                                                                                                                                                                                                                                                                                                    | BLD.CD4.NPC;<br><br>BRN.ANT.CAUD<br>;<br>BRN.CING.GYR;<br>BRN.INF.TMP;<br>BRN.ANG.GYR;                                                                                      | <b>H3K4me1</b><br>CRVX.HEL<br>AS3.CNCR<br>;<br><b>H3K27ac</b><br>None                                                                                             | <b>H3K4me<br/>3</b><br>None<br><br><b>H3K9ac</b><br>none                                      |  |

|               |                                                                                                                                                                                                                                                                                                                                                                                                                                                                                                                                                                                                                                                                                                                                                                                                                                                                 |                                                                                                                                                                                                                                                                                                         |                                                                                                                                                                                                                                                                                                                                                                                                                                                                                                                                                                                                                                                                                                                   |                                                                                                                                                                                                             |                                                                                      |                                                                                                                                                                                                                             |                                                                                                                                                                  |                                                                                                                                                                                                                                                                                |                                                                                                                                                                                                                                                                                                    |
|---------------|-----------------------------------------------------------------------------------------------------------------------------------------------------------------------------------------------------------------------------------------------------------------------------------------------------------------------------------------------------------------------------------------------------------------------------------------------------------------------------------------------------------------------------------------------------------------------------------------------------------------------------------------------------------------------------------------------------------------------------------------------------------------------------------------------------------------------------------------------------------------|---------------------------------------------------------------------------------------------------------------------------------------------------------------------------------------------------------------------------------------------------------------------------------------------------------|-------------------------------------------------------------------------------------------------------------------------------------------------------------------------------------------------------------------------------------------------------------------------------------------------------------------------------------------------------------------------------------------------------------------------------------------------------------------------------------------------------------------------------------------------------------------------------------------------------------------------------------------------------------------------------------------------------------------|-------------------------------------------------------------------------------------------------------------------------------------------------------------------------------------------------------------|--------------------------------------------------------------------------------------|-----------------------------------------------------------------------------------------------------------------------------------------------------------------------------------------------------------------------------|------------------------------------------------------------------------------------------------------------------------------------------------------------------|--------------------------------------------------------------------------------------------------------------------------------------------------------------------------------------------------------------------------------------------------------------------------------|----------------------------------------------------------------------------------------------------------------------------------------------------------------------------------------------------------------------------------------------------------------------------------------------------|
|               |                                                                                                                                                                                                                                                                                                                                                                                                                                                                                                                                                                                                                                                                                                                                                                                                                                                                 |                                                                                                                                                                                                                                                                                                         | GI.L.INT.FET; GI.S.INT;<br>GI.RECT.MUC.29;<br>GI.RECT.MUC.31; GI.STMC.MUC;<br>GI.DUO.MUC; GI.ESO;                                                                                                                                                                                                                                                                                                                                                                                                                                                                                                                                                                                                                 |                                                                                                                                                                                                             |                                                                                      | MUS.SKLT.M;<br>GI.CLN.SM.MUS<br>; GI.STMC.MUS;<br>GI.STMC.MUC;<br>GI.DUO.MUC;<br>LNG.FET;<br>LIV.ADLT;                                                                                                                      |                                                                                                                                                                  |                                                                                                                                                                                                                                                                                |                                                                                                                                                                                                                                                                                                    |
| rs2781<br>815 | None                                                                                                                                                                                                                                                                                                                                                                                                                                                                                                                                                                                                                                                                                                                                                                                                                                                            | None                                                                                                                                                                                                                                                                                                    | BLD.CD4.CD25M.IL17P.PL.TPC;<br>BLD.CD8.NPC;<br>BRN.CRTX.DR.NRSPHR;<br>BRN.HIPP.MID; BRN.ANT.CAUD;<br>BRN.CING.GYR;<br>BRN.DL.PRFRTL.CRTX;<br>MUS.SKLT.F; GI.DUO.SM.MUS;<br>GI.CLN.SM.MUS; GI.S.INT.FET;<br>GI.L.INT.FET; GI.S.INT;<br>GI.RECT.MUC.29;<br>GI.RECT.MUC.31; GI.STMC.MUC;<br>GI.DUO.MUC; GI.ESO;                                                                                                                                                                                                                                                                                                                                                                                                      | SKIN.PEN.FRS<br>K.FIB.02;<br>BRN.ANG.GYR<br>; MUS.SKLT.F;<br>GI.DUO.SM.M<br>US;<br>GI.DUO.MUC;                                                                                                              | BRN.INF.TMP;<br>BRN.DL.PRFRTL.CRTX;<br>GI.DUO.SM.MUS; OVRY;                          | BLD.CD4.NPC;<br>BRN.ANT.CAUD<br>;<br>BRN.CING.GYR;<br>BRN.INF.TMP;<br>BRN.ANG.GYR;<br>MUS.SKLT.M;<br>GI.CLN.SM.MUS<br>; GI.STMC.MUS;<br>GI.STMC.MUC;<br>GI.DUO.MUC;<br>LNG.FET;<br>LIV.ADLT;                                | <b>H3K4me1</b><br>CRVX.HEL<br>AS3.CNCR<br>;<br><b>H3K27ac</b><br>None                                                                                            | <b>H3K4me3</b><br>None<br><br><b>H3K9ac</b><br>none                                                                                                                                                                                                                            |                                                                                                                                                                                                                                                                                                    |
| rs3850<br>616 | <b>19_DNase</b><br>(LNG.IMR90; ESC.WA7; ESC.H9; ESC.I3;<br>ESC.HUES6; ESC.HUES48; ESC.HUES64;<br>ESC.H1; ESC.4STAR; IPSC.20B; IPSC.18;<br>IPSC.15b; PSC.DF.6.9; IPSC.DF.19.11;<br>ESDR.H1.NEUR.PROG;<br>ESDR.H9.NEUR.PROG; ESDR.H9.NEUR;<br>ESDR.CD56.MESO; ESDR.CD56.ECTO;<br>ESDR.CD184.ENDO;<br>ESDR.H1.BMP4.MESO;<br>ESDR.H1.BMP4.TROP; ESDR.H1.MSC;<br>STRM.MRW.MSC;<br>STRM.CHON.MRW.DR.MSC;<br>FAT.ADIP.DR.MSC; FAT.MSC.DR.ADIP;<br>MUS.SAT; SKIN.PEN.FRSK.MEL.03;<br>SKIN.PEN.FRSK.KER.03; <b>BRST.HMEC.35</b> ;<br>BRN.GANGEM.DR.NRSPHR;<br>BRN.CRTX.DR.NRSPHR; BRN.GRM.MTRX;<br>BRN.FET.F; BRN.FET.M; FAT.ADIP.NUC;<br>MUS.PSOAS; MUS.TRNK.FET; HRT.FET;<br>HRT.ATR.R; HRT.VENT.L; VAS.AOR;<br>GI.CLN.SM.MUS; GI.STMC.FET;<br>GI.S.INT.FET; GI.S.INT; GI.CLN.SIG;<br>GI.ESO; GI.STMC.GAST; PLCNT.AMN;<br>KID.FET; OVRY; PANC.ISLT; LIV.ADLT;<br>PANC) | <b>19_DNase</b><br>(LNG.A549.<br>ETOHO02.C<br>NCR;<br>CRVX.HELA<br>S3.CNCR;<br><b>BRST.HMEC</b><br>;<br>MUS.HSM<br>M;<br>MUS.HSM<br>MT;<br>VAS.HUVEC<br>; BRN.NHA;<br>SKIN.NHDF<br>AD;<br>SKIN.NHEK;<br>LNG.NHLF;<br>BONE.OSTE<br>O)<br><br><b>16_EnhW1</b><br>(BLD.DND4<br>1.CNCR;<br>BLD.GM12<br>878; | LNG.IMR90; ESC.WA7;<br>ESC.I3; ESC.HUES6; ESC.HUES48;<br>ESC.H1; IPSC.15b; IPSC.DF.19.11;<br>ESDR.H9.NEUR.PROG;<br>ESDR.CD56.ECTO;<br>ESDR.H1.BMP4.TROP;<br>ESDR.H1.MSC; BLD.CD3.PPC;<br>BLD.CD4.CD25.CD127M.TREGPC;<br>BLD.CD4.CD25M.TPC;<br>BLD.CD4.CD25M.CD45RA.NPC;<br>BLD.CD4.CD25M.IL17M.PL.TPC;<br>BLD.CD4.CD25M.IL17P.PL.TPC;<br>BLD.CD4.MPC; BLD.CD8.MPC;<br>BLD.CD4.NPC; BLD.CD14.PC;<br>BLD.CD34.PC;<br>BLD.MOB.CD34.PC.M;<br>BLD.MOB.CD34.PC.F;<br>BLD.CD34.CC; BLD.CD19.PPC;<br>BLD.CD56.PC; BLD.CD15.PC;<br>FAT.ADIP.DR.MSC;<br>SKIN.PEN.FRSK.FIB.01;<br>SKIN.PEN.FRSK.FIB.02;<br>SKIN.PEN.FRSK.MEL.03;<br><b>BRST.MYO</b> ; THYM.FET;<br>BRN.HIPP.MID; BRN.SUB.NIG;<br>BRN.ANT.CAUD; BRN.CING.GYR; | ESDR.H1.NEU<br>R.PROG;<br>BLD.CD4.MPC;<br>BLD.MOB.CD3<br>4.PC.M;<br>BLD.MOB.CD3<br>4.PC.F;<br>SKIN.PEN.FRS<br>K.FIB.01;<br>SKIN.PEN.FRS<br>K.FIB.02;<br>SKIN.PEN.FRS<br>K.MEL.01;<br>BRN.HIPP.MID<br>; SPLN | BLD.CD8.MPC;<br>SKIN.PEN.FRSK.FIB.02;<br>BRN.ANT.CAUD; HRT.VNT.R;<br>GI.RECT.MUC.31; | ESDR.H1.NEUR.<br>PROG;<br>BLD.CD4.NPC;<br>STRM.CHON.M<br>RW.DR.MSC;<br>FAT.ADIP.DR.M<br>SC;<br>BRN.SUB.NIG;<br>BRN.ANT.CAUD<br>;<br>BRN.CING.GYR;<br>BRN.INF.TMP;<br>BRN.DL.PRFRTL<br>L.CRTX;<br>MUS.SKLT.M;<br>GI.DUO.MUC; | <b>H3K4me1</b><br>BLD.DND4<br>1.CNCR;<br>BLD.GM1<br>2878;<br>CRVX.HEL<br>AS3.CNCR<br>;<br>BLD.K562.<br>CNCR;<br>BLD.CD14.<br>MONO;<br><br><b>H3K27ac</b><br>None | <b>H3K4me3</b><br>LNG.A54<br>9.ETOHO<br>02.CNCR<br>CRVX.HEL<br>AS3.CNCR<br>;<br>BLD.DND<br>41.CNCR<br>;<br>BLD.GM<br>12878;<br>CRVX.HE<br>LAS3.CN<br>CR;<br>LIV.HEP<br>G2.CNCR<br>;<br><b>BRST.H<br/>MEC</b> ;<br>MUS.HS<br>MM;<br>MUS.HS<br>MMT;<br>VAS.HUV<br>EC;<br>BLD.K56 | ROADMAP<br>LNG.IMR90<br>; ESC.H9;<br>ESC.H1;<br>PSC.DF.6.9;<br>IPSC.DF.19.<br>11;<br>ESDR.H1.N<br>EUR.PROG;<br>ESDR.H1.B<br>MP4.MESO<br>;<br>ESDR.H1.M<br>SC;<br>BLD.CD3.PP<br>C;<br>BLD.CD3.CP<br>C;<br>BLD.CD14.P<br>C;<br>BLD.MOB.C<br>D34.PC.M;<br>BLD.MOB.C<br>D34.PC.F;<br>BLD.CD19.P<br>PC; |

|  |                                                                                                                                                                                                                                                                                                                                                                                                                                                                                                                                                                                                                                                                                                                                                                                                                                                                                                                                                                                                                                                                                                                       |                                                                                                     |                                                                                                                                                                                                                                                                                                                                                      |  |  |  |  |                                                                                                                                                                                                     |                                                                                                                                                                                                                                                                                                                                                                                                                                                                                                                                                                                                                        |
|--|-----------------------------------------------------------------------------------------------------------------------------------------------------------------------------------------------------------------------------------------------------------------------------------------------------------------------------------------------------------------------------------------------------------------------------------------------------------------------------------------------------------------------------------------------------------------------------------------------------------------------------------------------------------------------------------------------------------------------------------------------------------------------------------------------------------------------------------------------------------------------------------------------------------------------------------------------------------------------------------------------------------------------------------------------------------------------------------------------------------------------|-----------------------------------------------------------------------------------------------------|------------------------------------------------------------------------------------------------------------------------------------------------------------------------------------------------------------------------------------------------------------------------------------------------------------------------------------------------------|--|--|--|--|-----------------------------------------------------------------------------------------------------------------------------------------------------------------------------------------------------|------------------------------------------------------------------------------------------------------------------------------------------------------------------------------------------------------------------------------------------------------------------------------------------------------------------------------------------------------------------------------------------------------------------------------------------------------------------------------------------------------------------------------------------------------------------------------------------------------------------------|
|  | <p><b>16_EnhW1</b><br/>(BLD.PER.MONUC.PC;<br/>BLD.CD4.CD251.CD127.TMEMPC;<br/>BLD.CD4.CD25.CD127M.TREGPC;<br/>BLD.CD4.CD25M.TPC;<br/>BLD.CD4.CD25M.CD45RA.NPC;<br/>BLD.CD4.CD25M.IL17M.PL.TPC;<br/>BLD.CD4.CD25M.IL17P.PL.TPC;<br/>BLD.CD4.CD25M.CD45RO.MPC;<br/>BLD.CD4.MPC; BLD.CD8.MPC;<br/>BLD.CD4.NPC; BLD.CD14.PC;<br/>BLD.CD19.CPC; BLD.CD34.CC;<br/>BLD.CD19.PPC; BLD.CD56.PC;<br/>BLD.CD15.PC; SKIN.PEN.FRSK.FIB.01;<br/>SKIN.PEN.FRSK.FIB.02;<br/>SKIN.PEN.FRSK.MEL.01; <b>BRST.MYO</b>;<br/>THYM.FET; BRN.HIPP.MID;<br/>BRN.SUB.NIG; BRN.ANT.CAUD;<br/>BRN.INF.TMP; BRN.DL.PRFRTNL.CRTX;<br/>MUS.SKLT.F; MUS.SKLT.M;<br/>MUS.LEG.FET; HRT.VNT.R;<br/>GI.DUO.SM.MUS; GI.STMC.MUS;<br/>GI.L.INT.FET; GI.CLN.MUC;<br/>GI.RECT.MUC.29; GI.STMC.MUC;<br/>PLCNT.FET; LNG; SPLN)</p> <p><b>14_EnhW1</b><br/>(BLD.CD3.PPC; BLD.MOB.CD34.PC.F;<br/>BRN.CING.GYR; GI.DUO.MUC)</p> <p><b>17_EnhW2</b><br/>(BLD.CD3.CPC; BLD.CD8.NPC;<br/>BLD.CD34.PC; SKIN.PEN.FRSK.KER.02;<br/>THYM; BRN.ANG.GYR; GI.RECT.SM.MUS;<br/>GI.RECT.MUC.31; LNG.FET;<br/>ADRL.GLND.FET)</p> <p><b>13_EnhA1</b><br/>(BLD.MOB.CD34.PC.M)</p> | <p>BLD.K562.C<br/>NCR;<br/>BLD.CD14.<br/>MONO)</p> <p><b>17_EnhW2</b><br/>(LIV.HEPG2.<br/>CNCR)</p> | <p>BRN.INF.TMP;<br/>BRN.DL.PRFRTNL.CRTX;<br/>FAT.ADIP.NUC;<br/>MUS.SKLT.F; MUS.SKLT.M;<br/>MUS.TRNK.FET; MUS.LEG.FET;<br/>HRT.VNT.R; GI.STMC.MUS;<br/>GI.STMC.FET; GI.S.INT.FET;<br/>GI.L.INT.FET; GI.CLN.MUC;<br/>GI.RECT.MUC.29;<br/>GI.RECT.MUC.31; GI.STMC.MUC;<br/>GI.DUO.MUC; GI.ESO;<br/>GI.STMC.GAST; PLCNT.FET;<br/>LIV.ADLT; LNG; SPLN</p> |  |  |  |  | <p>2.CNCR;<br/>BLD.CD1<br/>4.MONO<br/>;<br/>BRN.NH<br/>A;<br/>SKIN.NH<br/>DFAD;<br/>SKIN.NH<br/>EK;<br/>LNG.NHL<br/>F;<br/>BONE.O<br/>STEO</p> <p><b>H3K9ac</b><br/>CRVX.HE<br/>LAS3.CN<br/>CR;</p> | <p>BLD.CD56.P<br/>C;<br/>SKIN.PEN.F<br/>RSK.FIB.01;<br/>SKIN.PEN.F<br/>RSK.FIB.02;<br/>SKIN.PEN.F<br/>RSK.MEL.01<br/>;<br/><b>BRST.HMEC</b><br/><b>.35</b>;<br/>THYM.FET;<br/>BRN.FET.F;<br/>BRN.FET.M;<br/>MUS.PSOA<br/>S;<br/>MUS.TRNK.<br/>FET;<br/>MUS.LEG.F<br/>ET;<br/>HRT.FET;<br/>GI.STMC.FE<br/>T;<br/>GI.S.INT.FE<br/>T; GI.S.INT;<br/>GI.STMC.G<br/>AST;<br/>KID.FET;<br/>LNG.FET;<br/>OVRY;<br/>ADRL.GLND<br/>.FET;<br/>PLCNT.FET;<br/>PANC;<br/>ENCODE<br/>LNG.A549.E<br/>TOH002.CN<br/>CR;<br/>BLD.GM12<br/>878;<br/>CRVX.HEL<br/>S3.CNCR;<br/><b>BRST.HMEC</b><br/>;<br/>MUS.HSM<br/>M;<br/>MUS.HSM</p> |
|--|-----------------------------------------------------------------------------------------------------------------------------------------------------------------------------------------------------------------------------------------------------------------------------------------------------------------------------------------------------------------------------------------------------------------------------------------------------------------------------------------------------------------------------------------------------------------------------------------------------------------------------------------------------------------------------------------------------------------------------------------------------------------------------------------------------------------------------------------------------------------------------------------------------------------------------------------------------------------------------------------------------------------------------------------------------------------------------------------------------------------------|-----------------------------------------------------------------------------------------------------|------------------------------------------------------------------------------------------------------------------------------------------------------------------------------------------------------------------------------------------------------------------------------------------------------------------------------------------------------|--|--|--|--|-----------------------------------------------------------------------------------------------------------------------------------------------------------------------------------------------------|------------------------------------------------------------------------------------------------------------------------------------------------------------------------------------------------------------------------------------------------------------------------------------------------------------------------------------------------------------------------------------------------------------------------------------------------------------------------------------------------------------------------------------------------------------------------------------------------------------------------|

|                |                                                                                                                                                                                                                                                                                                                                                                                                                                                                                                                                                                                                                                                                                                                                                                                                                                                                                                                                                                                                                                                                                |                                                                                                                                                                                                                                                                                                                                                                                                              |                                                                                                                                                                                                                                                                                                                                                                                                                                                                                                                                                                                                                                                                                                                                                                                                                                                               |                                                                                 |                                                                                                                                                                                                                                                                                                                                                                                                                                                                                                            |                                                                                                                                                                                           |                                                                                                                                                                                                                                                                                                                                                                                                           |                                                                                                                                                                                                                                                                                            |                                                                                                                  |
|----------------|--------------------------------------------------------------------------------------------------------------------------------------------------------------------------------------------------------------------------------------------------------------------------------------------------------------------------------------------------------------------------------------------------------------------------------------------------------------------------------------------------------------------------------------------------------------------------------------------------------------------------------------------------------------------------------------------------------------------------------------------------------------------------------------------------------------------------------------------------------------------------------------------------------------------------------------------------------------------------------------------------------------------------------------------------------------------------------|--------------------------------------------------------------------------------------------------------------------------------------------------------------------------------------------------------------------------------------------------------------------------------------------------------------------------------------------------------------------------------------------------------------|---------------------------------------------------------------------------------------------------------------------------------------------------------------------------------------------------------------------------------------------------------------------------------------------------------------------------------------------------------------------------------------------------------------------------------------------------------------------------------------------------------------------------------------------------------------------------------------------------------------------------------------------------------------------------------------------------------------------------------------------------------------------------------------------------------------------------------------------------------------|---------------------------------------------------------------------------------|------------------------------------------------------------------------------------------------------------------------------------------------------------------------------------------------------------------------------------------------------------------------------------------------------------------------------------------------------------------------------------------------------------------------------------------------------------------------------------------------------------|-------------------------------------------------------------------------------------------------------------------------------------------------------------------------------------------|-----------------------------------------------------------------------------------------------------------------------------------------------------------------------------------------------------------------------------------------------------------------------------------------------------------------------------------------------------------------------------------------------------------|--------------------------------------------------------------------------------------------------------------------------------------------------------------------------------------------------------------------------------------------------------------------------------------------|------------------------------------------------------------------------------------------------------------------|
|                |                                                                                                                                                                                                                                                                                                                                                                                                                                                                                                                                                                                                                                                                                                                                                                                                                                                                                                                                                                                                                                                                                |                                                                                                                                                                                                                                                                                                                                                                                                              |                                                                                                                                                                                                                                                                                                                                                                                                                                                                                                                                                                                                                                                                                                                                                                                                                                                               |                                                                                 |                                                                                                                                                                                                                                                                                                                                                                                                                                                                                                            |                                                                                                                                                                                           |                                                                                                                                                                                                                                                                                                                                                                                                           |                                                                                                                                                                                                                                                                                            | MT;<br>VAS.HUVEC<br>;<br>BLD.K562.C<br>NCR;<br>BLD.CD14.<br>MONO;<br>SKIN.NHDF<br>AD;<br>SKIN.NHEK;<br>LNG.NHLF; |
| rs1702<br>4628 | <p><b>15_EnhAF</b><br/>(LNG.IMR90; ESC.HUES6; BRN.INF.TMP;<br/>BRN.ANG.GYR; GI.DUO.SM.MUS)</p> <p><b>17_EnhW2</b><br/>(ESC.WA7; ESC.H9; ESC.I3; ESC.HUES48;<br/>ESC.HUES64; ESC.H1; IPSC.20B; IPSC.18;<br/>IPSC.15b; PSC.DF.6.9; IPSC.DF.19.11;<br/>ESDR.H1.NEUR.PROG;<br/>ESDR.CD56.MESO; ESDR.CD56.ECTO;<br/>ESDR.CD184.ENDO;<br/>ESDR.H1.BMP4.MESO; BLD.CD15.PC;<br/>STRM.MRW.MSC;<br/>STRM.CHON.MRW.DR.MSC;<br/>FAT.MSC.DR.ADIP;<br/>SKIN.PEN.FRISK.MEL.01;<br/>SKIN.PEN.FRISK.MEL.03;<br/>SKIN.PEN.FRISK.KER.02;<br/>SKIN.PEN.FRISK.KER.03; <b>BRST.HMEC.35;</b><br/><b>BRST.MYO;</b> BRN.HIPP.MID;<br/>BRN.ANT.CAUD; BRN.CING.GYR;<br/>BRN.DL.PRFRTL.CRTX; MUS.SKLT.F;<br/>MUS.SKLT.M; MUS.TRNK.FET;<br/>MUS.LEG.FET; HRT.FET; GI.CLN.SM.MUS;<br/>GI.RECT.SM.MUS; GI.STMC.FET;<br/>GI.L.INT.FET; GI.S.INT; GI.CLN.SIG;<br/>GI.CLN.MUC; GI.RECT.MUC.29;<br/>GI.RECT.MUC.31; PLCNT.AMN; LNG.FET;<br/>OVRY; ADRL.GLND.FET; LIV.ADLT; LNG)</p> <p><b>16_EnhW1</b><br/>(ESC.4STAR; ESDR.H1.MSC;<br/>GI.DUO.MUC)</p> <p><b>13_EnhA1</b><br/>(FAT.ADIP.DR.MSC; GI.STMC.MUC)</p> | <p><b>2_PromU</b><br/>(LNG.A549.<br/>ETOH002.C<br/>NCR;<br/>CRVX.HEL<br/>S3.CNCR)</p> <p><b>17_EnhW2</b><br/><b>(BRST.HME</b><br/><b>C;</b><br/>MUS.HSM<br/>M;<br/>MUS.HSM<br/>MT;<br/>VAS.HUVEC<br/>; BRN.NHA;<br/>SKIN.NHDF<br/>AD;<br/>LNG.NHLF;</p> <p>16_EnhW1<br/>SKIN.NHEK)</p> <p><b>13_EnhA1</b><br/>(LIV.HEPG2.<br/>CNCR)</p> <p><b>14_EnhA2</b><br/>(BLD.K562.<br/>CNCR;<br/>BONE.OSTE<br/>O)</p> | <p>LNG.IMR90; ESC.WA7;<br/>ESC.I3; ESC.HUES6; ESC.HUES48;<br/>ESC.HUES64; ESC.H1; ESC.4STAR;<br/>IPSC.20B; IPSC.18; IPSC.15b;<br/>IPSC.DF.19.11;<br/>ESDR.H1.NEUR.PROG;<br/>ESDR.H9.NEUR.PROG;<br/>ESDR.CD56.ECTO;<br/>ESDR.CD184.ENDO;<br/>ESDR.H1.BMP4.MESO;<br/>ESDR.H1.BMP4.TROP;<br/>ESDR.H1.MSC;<br/>BLD.CD3.PPC;<br/>BLD.CD4.CD25I.CD127.TMEMPC;<br/>BLD.CD14.PC;<br/>BLD.MOB.CD34.PC.F;<br/>STRM.MRW.MSC;<br/>STRM.CHON.MRW.DR.MSC;<br/>FAT.ADIP.DR.MSC;<br/>FAT.MSC.DR.ADIP; MUS.SAT;<br/>SKIN.PEN.FRISK.FIB.01;<br/>SKIN.PEN.FRISK.FIB.02;<br/>SKIN.PEN.FRISK.KER.03;<br/><b>BRST.HMEC.35;</b><br/>BRN.HIPP.MID;<br/>BRN.ANT.CAUD;<br/>BRN.INF.TMP; BRN.ANG.GYR;<br/>BRN.GRM.MTRX;<br/>FAT.ADIP.NUC;<br/>MUS.SKLT.F; MUS.SKLT.M;<br/>MUS.TRNK.FET; MUS.LEG.FET;<br/>HRT.ATR.R; HRT.VENT.L;<br/>HRT.VNT.R;<br/>GI.DUO.SM.MUS;<br/>GI.CLN.SM.MUS;</p> | <p>ESC.WA7;<br/>ESDR.H1.MSC;<br/>SKIN.PEN.FR<br/>K.FIB.02;<br/>GI.STMC.MUS;</p> | <p>LNG.IMR90;<br/>ESC.HUES48;<br/>ESC.H1;<br/>IPSC.20B;<br/>IPSC.DF.19.11;<br/>ESDR.CD56.MESO;<br/>ESDR.CD184.ENDO;<br/>ESDR.H1.BMP4.MESO;<br/>ESDR.H1.MSC;<br/>BLD.CD4.CD25I.CD127.TME<br/>MPC;<br/>SKIN.PEN.FRISK.FIB.02;<br/>SKIN.PEN.FRISK.MEL.03;<br/>BRN.ANT.CAUD;<br/>BRN.CING.GYR;<br/>BRN.INF.TMP;<br/>BRN.ANG.GYR;<br/>BRN.DL.PRFRTL.CRTX;<br/>FAT.ADIP.NUC;<br/>HRT.ATR.R;<br/>GI.DUO.SM.MUS;<br/>GI.RECT.SM.MUS;<br/>GI.STMC.MUS;<br/>GI.S.INT; GI.CLN.SIG;<br/>GI.CLN.MUC;<br/>OVRY; LNG;</p> | <p>ESC.I3;<br/>ESC.HUES6;<br/>IPSC.20B;<br/>IPSC.15b;<br/>BLD.PER.MONU<br/>C.PC;<br/>BLD.CD8.NPC;<br/>BRN.CING.GYR;<br/>BRN.ANG.GYR;<br/>MUS.SKLT.M;<br/>GI.STMC.MUS;<br/>GI.DUO.MUC;</p> | <p><b>H3K4me1</b><br/>LNG.A549<br/>.ETOH002<br/>.CNCR;<br/>CRVX.HEL<br/>AS3.CNCR<br/>;<br/>LIV.HEPG2<br/>.CNCR;<br/>MUS.HSM<br/>MT;<br/>BLD.K562.<br/>CNCR;<br/>BLD.CD14.<br/>MONO;<br/>BRN.NHA;<br/>SKIN.NHD<br/>FAD;<br/>LNG.NHLF<br/>;<br/>BONE.OST<br/>EO</p> <p><b>H3K27ac</b><br/>LNG.A549<br/>.ETOH002<br/>.CNCR;<br/>CRVX.HEL<br/>AS3.CNCR<br/>;<br/>LIV.HEPG2<br/>.CNCR;<br/>BONE.OST<br/>EO</p> | <p><b>H3K4me</b><br/><b>3</b><br/>LNG.A54<br/>9.ETOH0<br/>02.CNCR<br/>;<br/>CRVX.HE<br/>LAS3.CN<br/>CR;<br/>LIV.HEP<br/>G2.CNCR<br/>;<br/>BONE.O<br/>STEO</p> <p><b>H3K9ac</b><br/>LNG.A54<br/>9.ETOH0<br/>02.CNCR<br/>;<br/>CRVX.HE<br/>LAS3.CN<br/>CR;<br/>LIV.HEP<br/>G2.CNCR<br/>;</p> | <p>ENCODE<br/><br/>CRVX.HEL<br/>S3.CNCR</p>                                                                      |

|                 |                                                                                                           |      |                                                                                                                                                                                                                                                                                                             |                                                                                                                  |                                                                                                                                            |                                                                                                                                                                                                 |                                                                          |                                                                          |  |
|-----------------|-----------------------------------------------------------------------------------------------------------|------|-------------------------------------------------------------------------------------------------------------------------------------------------------------------------------------------------------------------------------------------------------------------------------------------------------------|------------------------------------------------------------------------------------------------------------------|--------------------------------------------------------------------------------------------------------------------------------------------|-------------------------------------------------------------------------------------------------------------------------------------------------------------------------------------------------|--------------------------------------------------------------------------|--------------------------------------------------------------------------|--|
|                 | <b>14_EnhA2</b><br>(MUS.SAT; SKIN.PEN.FRSK.FIB.01;<br>SKIN.PEN.FRSK.FIB.02; FAT.ADIP.NUC;<br>GI.STMC.MUS) |      | GI.STMC.MUS; GI.STMC.FET;<br>GI.S.INT.FET; GI.L.INT.FET;<br>GI.S.INT;<br>GI.CLN.MUC; GI.RECT.MUC.29;<br>GI.RECT.MUC.31; GI.STMC.MUC;<br>GI.DUO.MUC; GI.ESO;<br>PLCNT.AMN; OVRY; LIV.ADLT;<br>SPLN                                                                                                           |                                                                                                                  |                                                                                                                                            |                                                                                                                                                                                                 |                                                                          |                                                                          |  |
| rs5843<br>4753  | None                                                                                                      | None | SKIN.PEN.FRSK.FIB.02;<br>MUS.TRNK.FET; SPLN                                                                                                                                                                                                                                                                 | None                                                                                                             | SKIN.PEN.FRSK.FIB.02;<br>MUS.TRNK.FET; SPLN                                                                                                | GI.STMC.MUS;                                                                                                                                                                                    | <b>H3K4me1</b><br>None<br><br><b>H3K27ac</b><br>None                     | <b>H3K4me3</b><br>None<br><br><b>H3K9ac</b><br>CRVX.HE<br>LAS3.CN<br>CR; |  |
| rs1488<br>98127 | None                                                                                                      | None | SKIN.PEN.FRSK.FIB.02;<br><br>MUS.TRNK.FET; SPLN                                                                                                                                                                                                                                                             | None                                                                                                             | SKIN.PEN.FRSK.FIB.02;                                                                                                                      | None                                                                                                                                                                                            | <b>H3K4me1</b><br>None<br><br><b>H3K27ac</b><br>none                     | <b>H3K4me3</b><br>None<br><br><b>H3K9ac</b><br>CRVX.HE<br>LAS3.CN<br>CR; |  |
| rs2015<br>20834 | None                                                                                                      | None | BLD.CD4.CD25M.IL17P.PL.TPC;<br>BLD.CD8.NPC;<br>BRN.CRTX.DR.NRSPHR;<br>BRN.HIPP.MID; BRN.ANT.CAUD;<br>BRN.CING.GYR;<br>BRN.DL.PRFRTL.CRTX;<br>MUS.SKLT.F; GI.DUO.SM.MUS;<br>GI.CLN.SM.MUS; GI.S.INT.FET;<br>GI.L.INT.FET; GI.S.INT;<br>GI.RECT.MUC.29; I.RECT.MUC.31;<br>GI.STMC.MUC; GI.DUO.MUC;<br>GI.ESO; | SKIN.PEN.FRSK.FIB.02;<br>BRN.ANG.GYR<br>;<br>BRN.DL.PRFRTL.CRTX;<br>MUS.SKLT.F;<br>GI.DUO.SM.MUS;<br>GI.DUO.MUC; | BRN.INF.TMP;<br>BRN.DL.PRFRTL.CRTX;<br>GI.DUO.SM.MUS;<br>GI.RECT.MUC.31; OVRY;                                                             | BLD.CD4.NPC;<br>BRN.ANT.CAUD<br>;<br>BRN.CING.GYR;<br>BRN.INF.TMP;<br>BRN.ANG.GYR;<br>MUS.SKLT.M;<br>GI.CLN.SM.MUS<br>;<br>GI.STMC.MUS;<br>GI.STMC.MUC;<br>GI.DUO.MUC;<br>LNG.FET;<br>LIV.ADLT; | <b>H3K4me1</b><br>CRVX.HE<br>AS3.CNCR<br>;<br><br><b>H3K27ac</b><br>None | <b>H3K4me3</b><br>None<br><br><b>H3K9ac</b><br>None                      |  |
|                 |                                                                                                           |      |                                                                                                                                                                                                                                                                                                             |                                                                                                                  |                                                                                                                                            |                                                                                                                                                                                                 |                                                                          |                                                                          |  |
| rs1869<br>959   | <b>10_TxEnh5</b><br>(MUS.SKLT.F; MUS.LEG.FET;<br>11_TxEnh3<br>MUS.TRNK.FET;<br>18_EnhAc<br>GI.STMC.FET)   | None | IPSC.15b;<br>BLD.CD3.PPC;<br>BLD.CD4.CD25.CD127M.TREGPC;<br>BLD.CD4.CD25M.TPC;<br>BLD.CD4.CD25M.CD45RA.NPC;<br>BLD.CD4.CD25M.IL17M.PL.TPC;                                                                                                                                                                  | None                                                                                                             | LNG.IMR90;<br>ESDR.CD56.ECTO;<br>ESDR.CD184.ENDO;<br>BLD.CD4.CD25I.CD127.TME<br>MPC;<br>BLD.CD4.CD25.CD127M.TRE<br>GPC; BLD.CD4.CD25M.TPC; | ESC.H1;<br><b>BRST.MYO</b> ;<br>BRN.ANG.GYR;<br>MUS.SKLT.M;<br>HRT.FET;                                                                                                                         | <b>H3K4me1</b><br>MUS.HSM<br>MT;<br><br><b>H3K27ac</b><br>MUS.HSM<br>MT; | <b>H3K4me3</b><br><br><br><b>None</b><br><br><b>H3K9ac</b>               |  |



|               |                                             |      |                                                                                                                                                                                                                                                                                     |                                                                                                                            |                                                                                                                                                                                                                                                                                                                                   |                                                                                                                                                                       |                                                                                            |                                                                      |                                                              |
|---------------|---------------------------------------------|------|-------------------------------------------------------------------------------------------------------------------------------------------------------------------------------------------------------------------------------------------------------------------------------------|----------------------------------------------------------------------------------------------------------------------------|-----------------------------------------------------------------------------------------------------------------------------------------------------------------------------------------------------------------------------------------------------------------------------------------------------------------------------------|-----------------------------------------------------------------------------------------------------------------------------------------------------------------------|--------------------------------------------------------------------------------------------|----------------------------------------------------------------------|--------------------------------------------------------------|
|               |                                             |      | BLD.CD4.NPC; BRN.HIPP.MID;<br>BRN.SUB.NIG; BRN.ANT.CAUD;<br>BRN.ANG.GYR; MUS.SKLT.F;<br>MUS.TRNK.FET; MUS.LEG.FET;<br>HRT.VNT.R; GI.S.INT.FET;<br>GI.CLN.MUC; GI.STMC.MUC;<br>PANC;                                                                                                 |                                                                                                                            | BLD.CD4.CD25M.CD45RA.N<br>PC;<br>BLD.CD4.CD25M.IL17M.PL.T<br>PC;<br>BLD.CD4.CD25M.IL17P.PL.T<br>PC;<br>BLD.CD4.CD25M.CD45RO.M<br>PC; BLD.CD4.MPC;<br>BLD.CD4.NPC;<br>BLD.MOB.CD34.PC.F;<br>SKIN.PEN.FRISK.FIB.02;<br>BRN.HIPP.MID;<br>BRN.SUB.NIG;<br>BRN.CING.GYR;<br>MUS.SKLT.F;<br>MUS.TRNK.FET;<br>MUS.LEG.FET;<br>HRT.VNT.R; |                                                                                                                                                                       | BLD.CD14.<br>MONO                                                                          | CRVX.HE<br>LAS3.CN<br>CR;<br>MUS.HS<br>MMT;                          |                                                              |
| rs4886<br>613 | None                                        | None | BLD.CD4.CD25M.CD45RA.NPC;<br>BLD.CD8.NPC;<br>MUS.TRNK.FET; GI.L.INT.FET;<br>GI.CLN.MUC;<br>GI.STMC.MUC; PANC.ISLT;                                                                                                                                                                  | None                                                                                                                       | BLD.CD3.PPC;<br>BLD.CD4.CD25.CD127M.TRE<br>GPC; BLD.CD4.CD25M.TPC;<br>BLD.CD4.CD25M.CD45RA.N<br>PC;<br>BLD.CD4.CD25M.IL17M.PL.T<br>PC;<br>BLD.CD4.NPC;<br>BLD.MOB.CD34.PC.F;<br>SKIN.PEN.FRISK.FIB.02;<br>BRN.HIPP.MID;<br>BRN.CING.GYR;<br>MUS.SKLT.F;<br>HRT.VNT.R;<br>GI.CLN.MUC;<br>GI.RECT.MUC.29;<br>PANC.ISLT;             | BLD.PER.MONU<br>C.PC;<br>BLD.CD4.NPC;<br>STRM.CHON.M<br>RW.DR.MSC;<br><b>BRST.MYO</b> ;<br>BRN.INF.TMP;<br>BRN.ANG.GYR;<br>FAT.ADIP.NUC;<br>GI.CLN.MUC;<br>PANC.ISLT; | <b>H3K4me1</b><br>BLD.GM1<br>2878;<br><b>H3K27ac</b><br>None                               | <b>H3K4me3</b><br>None<br><b>H3K9ac</b><br>None                      |                                                              |
| rs9362<br>30  | <b>11_TxEnh3</b><br>(SKIN.PEN.FRISK.FIB.02) | None | IPSC.DF.19.11;<br>ESDR.H1.BMP4.TROP;<br>ESDR.H1.MSC;<br>BLD.PER.MONUC.PC;<br>BLD.CD3.PPC;<br>BLD.CD4.CD25M.CD45RA.NPC;<br>SKIN.PEN.FRISK.FIB.01;<br>SKIN.PEN.FRISK.KER.03;<br>THYM.FET; MUS.SKLT.F;<br>MUS.TRNK.FET; MUS.LEG.FET;<br>GI.S.INT.FET; GI.L.INT.FET;<br>GI.RECT.MUC.29; | IPSC.DF.19.11;<br>ESDR.H1.NEU<br>R.PROG;<br>ESDR.H1.MSC;<br>SKIN.PEN.FRS<br>K.FIB.02;<br>SKIN.PEN.FRS<br>K.MEL.01;<br>SPLN | ESDR.CD184.ENDO;<br>BLD.CD3.PPC;<br>BLD.CD4.CD25I.CD127.TME<br>MPC;<br>BLD.CD4.CD25.CD127M.TRE<br>GPC; BLD.CD4.CD25M.TPC;<br>BLD.CD4.CD25M.CD45RA.N<br>PC;<br>BLD.CD4.CD25M.IL17M.PL.T<br>PC;<br>BLD.CD4.CD25M.IL17P.PL.T<br>PC;                                                                                                  | IPSC.15b;<br>ESDR.H1.NEUR.<br>PROG;<br>ESDR.H1.MSC;<br>BLD.PER.MONU<br>C.PC;<br>BLD.CD4.NPC;<br>STRM.CHON.M<br>RW.DR.MSC;<br><b>BRST.MYO</b> ;<br>BRN.ANT.CAUD<br>;   | <b>H3K4me1</b><br>SKIN.NHE<br>K;<br><b>H3K27ac</b><br>MUS.HSM<br>MT;<br>BLD.CD14.<br>MONO; | <b>H3K4me3</b><br>None<br><b>H3K9ac</b><br>CRVX.HE<br>LAS3.CN<br>CR; | Roadmap<br>MUS.PSOA<br>S<br><br>ENCODE<br>LIV.HEPG2.<br>CNCR |

|               |                                                                                             |                                      |                                                                                                                                                                                                                                                                                                                                                                                                                                                                                                                                                                                                                                                                                                                                                                    |                                                      |                                                                                                                                                                                                                                                                                                                                                                                                                                                                                                                             |                                                                                                                                                                                                                                                                                                    |                                                                                                                                                                                                                                                |                                                                                                                                                                                                |  |
|---------------|---------------------------------------------------------------------------------------------|--------------------------------------|--------------------------------------------------------------------------------------------------------------------------------------------------------------------------------------------------------------------------------------------------------------------------------------------------------------------------------------------------------------------------------------------------------------------------------------------------------------------------------------------------------------------------------------------------------------------------------------------------------------------------------------------------------------------------------------------------------------------------------------------------------------------|------------------------------------------------------|-----------------------------------------------------------------------------------------------------------------------------------------------------------------------------------------------------------------------------------------------------------------------------------------------------------------------------------------------------------------------------------------------------------------------------------------------------------------------------------------------------------------------------|----------------------------------------------------------------------------------------------------------------------------------------------------------------------------------------------------------------------------------------------------------------------------------------------------|------------------------------------------------------------------------------------------------------------------------------------------------------------------------------------------------------------------------------------------------|------------------------------------------------------------------------------------------------------------------------------------------------------------------------------------------------|--|
|               |                                                                                             |                                      | GI.STMC.MUC; GI.DUO.MUC;<br>GI.E50; GI.STMC.GAST;<br>SPLN                                                                                                                                                                                                                                                                                                                                                                                                                                                                                                                                                                                                                                                                                                          |                                                      | BLD.CD4.CD25M.CD45RO.M<br>PC; BLD.CD4.MPC;<br>BLD.CD4.NPC;<br>BLD.MOB.CD34.PC.F;<br>SKIN.PEN.FRISK.FIB.01;<br>SKIN.PEN.FRISK.FIB.02;<br>SKIN.PEN.FRISK.MEL.01;<br>SKIN.PEN.FRISK.MEL.03;<br>SKIN.PEN.FRISK.KER.03;<br>THYM; BRN.HIPP.MID;<br>BRN.SUB.NIG;<br>BRN.CING.GYR;<br>MUS.SKLT.F;<br>MUS.TRNK.FET;<br>HRT.VNT.R;<br>GI.CLN.SM.MUS;<br>GI.S.INT; GI.RECT.MUC.29;<br>LNG;                                                                                                                                             | BRN.CING.GYR;<br>BRN.INF.TMP;<br>BRN.ANG.GYR;<br>MUS.SKLT.F;<br>MUS.SKLT.M;<br>GI.STMC.MUS;<br>GI.RECT.MUC.2<br>9;<br>GI.DUO.MUC;                                                                                                                                                                  |                                                                                                                                                                                                                                                |                                                                                                                                                                                                |  |
| rs7180<br>432 | <b>15_EnhAF</b><br>(MUS.TRNK.FET;<br>17_EnhW2<br>MUS.LEG.FET;<br>12_TxEnhW2<br>GI.STMC.FET) | <b>17_EnhW2</b><br>(BLD.GM12<br>878) | ESDR.CD56.ECTO;<br>ESDR.H1.BMP4.TROP;<br>ESDR.H1.MSC;<br>BLD.PER.MONUC.PC;<br>BLD.CD3.PPC;<br>BLD.CD4.CD25I.CD127.TMEMPC;<br>BLD.CD4.CD25.CD127M.TREGPC;<br>BLD.CD4.CD25M.TPC;<br>BLD.CD4.CD25M.CD45RA.NPC;<br>BLD.CD4.CD25M.IL17M.PL.TPC;<br>BLD.CD4.CD25M.IL17P.PL.TPC;<br>BLD.CD4.CD25M.CD45RO.MPC;<br>BLD.CD4.MPC; BLD.CD8.MPC;<br>BLD.CD4.NPC; BLD.CD8.NPC;<br>BLD.MOB.CD34.PC.M;<br>BLD.MOB.CD34.PC.F;<br>BLD.CD34.CC; BLD.CD19.PPC;<br>BLD.CD56.PC;<br>SKIN.PEN.FRISK.FIB.02;<br>SKIN.PEN.FRISK.MEL.01;<br>SKIN.PEN.FRISK.KER.03;<br><b>BRST.HMEC.35</b> ;<br>THYM.FET; BRN.HIPP.MID;<br>BRN.SUB.NIG; BRN.ANT.CAUD;<br>BRN.CING.GYR; BRN.ANG.GYR;<br>BRN.DL.PRFRTL.CRTX;<br>BRN.FET.M; FAT.ADIP.NUC;<br>MUS.PSOAS; MUS.SKLT.F;<br>MUS.SKLT.M; MUS.TRNK.FET; | BRN.ANT.CAU<br>D;<br>HRT.FET;<br>GI.RECT.SM.M<br>US; | ESDR.CD56.ECTO;<br>ESDR.CD184.ENDO;<br>BLD.PER.MONUC.PC;<br>BLD.CD4.CD25I.CD127.TME<br>MPC;<br>BLD.CD4.CD25.CD127M.TRE<br>GPC;<br>BLD.CD4.CD25M.CD45RA.N<br>PC;<br>BLD.CD4.CD25M.IL17M.PL.T<br>PC;<br>BLD.CD4.CD25M.IL17P.PL.T<br>PC;<br><br>BLD.CD4.MPC;<br>BLD.CD4.NPC;<br>BLD.MOB.CD34.PC.F;<br>BLD.CD19.PPC;<br>BLD.CD56.PC;<br>SKIN.PEN.FRISK.FIB.01;<br>SKIN.PEN.FRISK.MEL.01;<br>SKIN.PEN.FRISK.MEL.03;<br>SKIN.PEN.FRISK.KER.03;<br>BRN.HIPP.MID;<br>BRN.SUB.NIG;<br>BRN.ANT.CAUD;<br>BRN.CING.GYR;<br>BRN.INF.TMP; | ESC.HUES64;<br>IPSC.15b;<br>BLD.PER.MONU<br>C.PC;<br>BLD.CD4.NPC;<br>BRN.ANT.CAUD<br>;<br>BRN.ANG.GYR;<br>BRN.DL.PRFRTL<br>L.CRTX;<br>FAT.ADIP.NUC;<br>MUS.SKLT.F;<br>MUS.SKLT.M;<br>HRT.FET;<br>GI.RECT.SM.MU<br>S;<br>GI.STMC.MUS;<br>GI.RECT.MUC.2<br>9;<br>GI.RECT.MUC.3<br>1;<br>GI.STMC.MUC; | <b>H3K4me1</b><br>LNG.A549<br>.ETOH002<br>.CNCR;<br>BLD.GM1<br>2878;<br>MUS.HSM<br>MT;<br>SKIN.NHE<br>K;<br><br><b>H3K27ac</b><br>BLD.DND4<br>1.CNCR;<br>BLD.GM1<br>2878;<br>CRVX.HEL<br>AS3.CNCR<br>;<br>MUS.HSM<br>MT;<br>BLD.CD14.<br>MONO; | <b>H3K4me</b><br><b>3</b><br>BLD.GM<br>12878;<br><br><b>H3K9ac</b><br><br>BLD.GM<br>12878;<br>CRVX.HE<br>LAS3.CN<br>CR;<br>MUS.HS<br>MMT;<br>SKIN.NH<br>EK;<br>LNG.NHL<br>F;<br>BONE.O<br>STEO |  |

|                         |      |      |                                                                                                                                                                                                                                                                                                                      |           |                                                                                                                                                                                                                                                  |                                        |                                                                            |                                                          |  |
|-------------------------|------|------|----------------------------------------------------------------------------------------------------------------------------------------------------------------------------------------------------------------------------------------------------------------------------------------------------------------------|-----------|--------------------------------------------------------------------------------------------------------------------------------------------------------------------------------------------------------------------------------------------------|----------------------------------------|----------------------------------------------------------------------------|----------------------------------------------------------|--|
|                         |      |      | MUS.LEG.FET; HRT.FET;<br>HRT.ATR.R; HRT.VENT.L;<br>HRT.VNT.R; GI.DUO.SM.MUS;<br>GI.CLN.SM.MUS; GI.STMC.MUS;<br>GI.S.INT.FET; GI.L.INT.FET;<br>GI.S.INT; GI.CLN.MUC;<br>GI.RECT.MUC.29;<br>GI.RECT.MUC.31; GI.STMC.MUC;<br>GI.DUO.MUC; GI.ESO;<br>GI.STMC.GAST; PLCNT.AMN;<br>PLCNT.FET; LIV.ADLT; PANC; LNG;<br>SPLN |           | BRN.ANG.GYR;<br>BRN.DL.PRFRTNL.CRTX;<br><br>MUS.PSOAS; MUS.SKLT.F;<br><br>MUS.TRNK.FET;<br>MUS.LEG.FET;<br>HRT.ATR.R; HRT.VENT.L;<br>HRT.VNT.R;<br>GI.S.INT;<br>GI.CLN.MUC;<br>GI.RECT.MUC.29;<br>GI.RECT.MUC.31; GI.ESO;<br>ADRL.GLND.FET; SPLN |                                        |                                                                            |                                                          |  |
| <b>rs6793<br/>1591</b>  | None | None | None                                                                                                                                                                                                                                                                                                                 | None      | None                                                                                                                                                                                                                                             | None                                   | <b>H3K4me1</b><br>BRN.NHA;<br>BONE.OST<br>EO<br><br><b>H3K27ac</b><br>None | <b>H3K4me<br/>3</b><br>None<br><br><b>H3K9ac</b><br>None |  |
|                         |      |      |                                                                                                                                                                                                                                                                                                                      |           |                                                                                                                                                                                                                                                  |                                        |                                                                            |                                                          |  |
| <b>rs1637<br/>365</b>   | None | None | None                                                                                                                                                                                                                                                                                                                 | None      | None                                                                                                                                                                                                                                             | None                                   | <b>H3K4me1</b><br><br><br><b>H3K27ac</b>                                   | <b>H3K4me<br/>3</b><br><br><br><b>H3K9ac</b>             |  |
|                         |      |      |                                                                                                                                                                                                                                                                                                                      |           |                                                                                                                                                                                                                                                  |                                        |                                                                            |                                                          |  |
| <b>rs1813<br/>37095</b> | None | None | None                                                                                                                                                                                                                                                                                                                 | None      | None                                                                                                                                                                                                                                             | None                                   | <b>H3K4me1</b><br>BRN.NHA;<br>BONE.OST<br>EO<br><br><b>H3K27ac</b>         | <b>H3K4me<br/>3</b><br><br><br><b>H3K9ac</b>             |  |
|                         |      |      |                                                                                                                                                                                                                                                                                                                      |           |                                                                                                                                                                                                                                                  |                                        |                                                                            |                                                          |  |
| <b>rs6038<br/>1548</b>  | None | None | BLD.CD3.PPC;<br>BLD.CD4.CD25I.CD127.TMEMPC;<br>BLD.CD4.CD25.CD127M.TREGPC;<br>BLD.CD4.CD25M.TPC;<br>BLD.CD4.CD25M.CD45RA.NPC;<br>BLD.CD4.CD25M.IL17M.PL.TPC;                                                                                                                                                         | GI.S.INT; | ESC.H9; ESC.HUES6;<br>BLD.CD4.CD25.CD127M.TRE<br>GPC;<br>BLD.CD4.CD25M.IL17M.PL.T<br>PC; BLD.CD8.MPC;<br>GI.STMC.GAST; LNG;                                                                                                                      | ESDR.H1.NEUR.<br>PROG;<br>ESDR.H1.MSC; | <b>H3K4me1</b><br>None<br><br><b>H3K27ac</b><br>BLD.CD14.<br>MONO;         | <b>H3K4me<br/>3</b><br>None<br><br><b>H3K9ac</b><br>None |  |

|  |  |  |                                                                                                                                                                                                                                                                                                                                                                            |  |  |  |                                                   |  |  |
|--|--|--|----------------------------------------------------------------------------------------------------------------------------------------------------------------------------------------------------------------------------------------------------------------------------------------------------------------------------------------------------------------------------|--|--|--|---------------------------------------------------|--|--|
|  |  |  | BLD.CD4.CD25M.IL17P.PL.TPC;<br>BLD.CD4.CD25M.CD45RO.MPC;<br>BLD.CD4.MPC; BLD.CD8.MPC;<br>BLD.CD4.NPC; BLD.CD8.NPC;<br>BLD.CD56.PC;<br>SKIN.PEN.FRSK.KER.03;<br><b>BRST.HMEC.35; BRST.MYO;</b><br>BRN.DL.PRFRTNL.CRTX;<br>MUS.PSOAS; MUS.SKLT.F;<br>HRT.VENT.L; HRT.VNT.R;<br>VAS.AOR; GI.DUO.SM.MUS;<br>GI.STMC.MUS; GI.ESO;<br>GI.STMC.GAST; LNG.FET; OVRY;<br>PANC; LNG; |  |  |  | SKIN.NHE<br>K;<br>LNG.NHLF<br>;<br>BONE.OST<br>EO |  |  |
|--|--|--|----------------------------------------------------------------------------------------------------------------------------------------------------------------------------------------------------------------------------------------------------------------------------------------------------------------------------------------------------------------------------|--|--|--|---------------------------------------------------|--|--|

\*Highlighted in yellow are breast tissues; in red are the 25-state model active enhancers and promoters and DNase for the breast tissues

Supplementary table 7B: Detailed functional annotation for novel loci and correlated SNPs ( $r^2 > 0.8$ ) - Africans

| SNP       | Roadmap 25-state model using 12 imputed marks                                                                                                                                                                                                                                                                                                                                                                                                                                                                                                                                                                                                                                                                                                                                                                                                                                                                    | ENCODE 25-state model using 12 imputed marks                                                                                                                                                                                                                                                                                                                                                                                                                                       | Roadmap H3K4me1                                                                                                                                                                                                                                                                                                                                                                                                                                                                                                                                                                                                                                                                                                                                                                                                                                                                                                                                                                                                                                                                                                                            | Roadmap H3K4me3                                                                                                                                                                                                                                                                                                                                                                                                                                                                                                                                                                                                                                                                                                                                                                                                                                                                                                                                                                                                                                                   | Roadmap H3K27ac                                                                                                                                                                                                                                                                                                                                                                                                                                                                                                                                                                                                                                                                                                                                                                                                                                                               | Roadmap H3K9ac                                                                                                                                                                                                                                                                                                                                                                                                                                                                                              | ENCODE Enhancers H3K4me1 and H3K27ac                                                                                                                                                                                                                                                                                                                                                                   | ENCODE Promoters H3K4me3 and H3K9ac                                                                                                                                                                                                | DNase                                                                                                                                                                                                                                                                  |
|-----------|------------------------------------------------------------------------------------------------------------------------------------------------------------------------------------------------------------------------------------------------------------------------------------------------------------------------------------------------------------------------------------------------------------------------------------------------------------------------------------------------------------------------------------------------------------------------------------------------------------------------------------------------------------------------------------------------------------------------------------------------------------------------------------------------------------------------------------------------------------------------------------------------------------------|------------------------------------------------------------------------------------------------------------------------------------------------------------------------------------------------------------------------------------------------------------------------------------------------------------------------------------------------------------------------------------------------------------------------------------------------------------------------------------|--------------------------------------------------------------------------------------------------------------------------------------------------------------------------------------------------------------------------------------------------------------------------------------------------------------------------------------------------------------------------------------------------------------------------------------------------------------------------------------------------------------------------------------------------------------------------------------------------------------------------------------------------------------------------------------------------------------------------------------------------------------------------------------------------------------------------------------------------------------------------------------------------------------------------------------------------------------------------------------------------------------------------------------------------------------------------------------------------------------------------------------------|-------------------------------------------------------------------------------------------------------------------------------------------------------------------------------------------------------------------------------------------------------------------------------------------------------------------------------------------------------------------------------------------------------------------------------------------------------------------------------------------------------------------------------------------------------------------------------------------------------------------------------------------------------------------------------------------------------------------------------------------------------------------------------------------------------------------------------------------------------------------------------------------------------------------------------------------------------------------------------------------------------------------------------------------------------------------|-------------------------------------------------------------------------------------------------------------------------------------------------------------------------------------------------------------------------------------------------------------------------------------------------------------------------------------------------------------------------------------------------------------------------------------------------------------------------------------------------------------------------------------------------------------------------------------------------------------------------------------------------------------------------------------------------------------------------------------------------------------------------------------------------------------------------------------------------------------------------------|-------------------------------------------------------------------------------------------------------------------------------------------------------------------------------------------------------------------------------------------------------------------------------------------------------------------------------------------------------------------------------------------------------------------------------------------------------------------------------------------------------------|--------------------------------------------------------------------------------------------------------------------------------------------------------------------------------------------------------------------------------------------------------------------------------------------------------------------------------------------------------------------------------------------------------|------------------------------------------------------------------------------------------------------------------------------------------------------------------------------------------------------------------------------------|------------------------------------------------------------------------------------------------------------------------------------------------------------------------------------------------------------------------------------------------------------------------|
| rs2522057 | <p><b>22_PromP</b><br/>(ESDR.H9.NEUR.PROG;<br/>ESDR.CD56.MESO;<br/>BRN.CRTX.DR.NRSPHR;<br/>BRN.GRM.MTRX)</p> <p><b>19_DNase</b><br/>(ESDR.H9.NEUR)</p> <p>17_EnhW2<br/>ESDR.H1.BMP4.TROP;<br/>SKIN.PEN.FRSK.FIB.02;<br/>SKIN.PEN.FRSK.MEL.03; OVRY;<br/>PANC.ISLT;</p> <p><b>15_EnhAF</b><br/>(ESDR.H1.MSC; FAT.ADIP.DR.MSC;<br/>FAT.MSC.DR.ADIP;<br/>SKIN.PEN.FRSK.FIB.01;<br/>SKIN.PEN.FRSK.MEL.01; HRT.ATR.R;<br/>HRT.VENT.L; HRT.VNT.R;<br/>GI.STMC.GAST; PANC; LNG)</p> <p><b>13_EnhA1</b><br/>(BLD.PER.MONUC.PC;<br/>BLD.CD4.CD25I.CD127.TMEMPC;<br/>BLD.CD3.CPC;<br/>BLDBLD.CD4.CD25M.CD45RA.NPC;<br/>BLD.CD4.CD25M.IL17P.PL.TPC;<br/>BLD.CD4.CD25M.IL17P.PL.TPC;<br/>BLD.CD8.NPC; BLD.CD34.PC;<br/>STRM.MRW.MSC; THYM;<br/>FAT.ADIP.NUC; GI.DUO.SM.MUS;<br/>GI.S.INT; GI.CLN.SIG; GI.RECT.MUC.31;<br/>LIV.ADLT;</p> <p>3_PromD1 (BLD.CD3.PPC;<br/>BLD.CD4.CD25.CD127M.TREGPC;<br/>BLD.CD4.CD25M.TPC;</p> | <p><b>2_PromU</b><br/>(BLD.GM12<br/>878;<br/>BLD.CD14.<br/>MONO);<br/>13_EnhA1<br/>(LIV.ADLT;<br/>BLD.DND41<br/>.CNCR;<br/>MUS.HSM<br/>MT;<br/>BLD.K562.C<br/>NCR)</p> <p><b>14_EnhA2</b><br/>(LIV.HEPG2.<br/>CNCR;<br/><b>BRST.HMEC</b><br/>;<br/>MUS.HSM<br/>M;<br/>VAS.HUVEC<br/>;<br/>SKIN.NHEK;<br/>BONE.OSTE<br/>O);<br/>15_EnhAF<br/>(LNG.A549.<br/>ETOHO02.C<br/>NCR;<br/>BRN.NHA;<br/>SKIN.NHDF<br/>AD;<br/>LNG.NHLF);<br/><b>17_EnhW2</b><br/>(CRVX.HEL<br/>S3.CNCR)</p> | <p>LNG.IMR90; ESC.WA7; ESC.H9;<br/>ESC.I3; ESC.HUES6; ESC.HUES48;<br/>ESC.H1; IPSC.20B; IPSC.15b;<br/>IPSC.DF.19.11; ESDR.CD56.MESO;<br/>ESDR.H1.BMP4.TROP;<br/>ESDR.H1.MSC;<br/>BLD.PER.MONUC.PC;<br/>BLD.CD3.PPC;<br/>BLD.CD4.CD25I.CD127.TMEMPC;<br/>BLD.CD3.CPC;<br/>BLD.CD4.CD25<br/>.CD127M.TRE<br/>GPC;<br/>BLD.CD4.CD25<br/>M.CD45RA.NP<br/>C;<br/>BLD.CD4.CD25<br/>M.IL17M.PL.T<br/>PC;<br/>BLD.CD4.CD25<br/>M.IL17P.PL.TP<br/>C;<br/>BLD.CD4.CD25<br/>M.CD45RO.M<br/>PC;<br/>BLD.CD4.MPC;<br/>BLD.CD8.MPC;<br/>BLD.CD4.NPC;<br/>BLD.CD8.NPC;<br/>BLD.CD14.PC;<br/>BLD.CD19.CPC;<br/>BLD.CD34.PC;<br/>BLD.MOB.CD34.PC.M;<br/>BLD.MOB.CD34.PC.F;<br/>BLD.CD34.CC; BLD.CD19.PPC;<br/>BLD.CD56.PC; BLD.CD15.PC;<br/>STRM.MRW.MSC;<br/>STRM.CHON.MRW.DR.MSC;<br/>MUS.SAT; SKIN.PEN.FRSK.FIB.01;<br/>SKIN.PEN.FRSK.FIB.02;<br/>SKIN.PEN.FRSK.MEL.01;<br/>SKIN.PEN.FRSK.MEL.03;<br/>SKIN.PEN.FRSK.KER.02;<br/>SKIN.PEN.FRSK.KER.03;<br/><b>BRST.HMEC.35; BRST.MYO;</b><br/>BRN.GANGEM.DR.NRSPHR;<br/>BRN.CRTX.DR.NRSPHR; THYM;<br/>THYM.FET; BRN.HIPP.MID;<br/>BRN.SUB.NIG; BRN.ANT.CAUD;<br/>BRN.CING.GYR;<br/>BRN.DL.PRFRTL.CRTX;</p> | <p>BLD.PER.MON<br/>UC.PC;<br/>BLD.CD3.PPC;<br/>BLD.CD4.CD25<br/>I.CD127.TME<br/>MPC;<br/>BLD.CD3.CPC;<br/>BLD.CD4.CD25<br/>.CD127M.TRE<br/>GPC;<br/>BLD.CD4.CD25<br/>M.CD45RA.NP<br/>C;<br/>BLD.CD4.CD25<br/>M.IL17M.PL.T<br/>PC;<br/>BLD.CD4.CD25<br/>M.CD45RA.NP<br/>C;<br/>BLD.CD4.CD25<br/>M.IL17M.PL.T<br/>PC;<br/>BLD.CD4.CD25<br/>M.IL17P.PL.TP<br/>C;<br/>BLD.CD4.CD25<br/>M.CD45RO.M<br/>PC;<br/>BLD.CD4.MPC;<br/>BLD.CD8.MPC;<br/>BLD.CD4.NPC;<br/>BLD.CD8.NPC;<br/>BLD.CD14.PC;<br/>BLD.CD19.CPC;<br/>BLD.CD34.PC;<br/>BLD.MOB.CD34.PC.M;<br/>BLD.MOB.CD34.PC.F;<br/>BLD.CD34.CC;<br/>BLD.CD19.PPC;<br/>BLD.CD56.PC; BLD.CD15.PC;<br/>STRM.MRW.MSC;<br/>STRM.CHON.MRW.DR.MSC;<br/>MUS.SAT; SKIN.PEN.FRSK.FIB.01;<br/>SKIN.PEN.FRSK.FIB.02;<br/>SKIN.PEN.FRSK.MEL.01;<br/>SKIN.PEN.FRSK.MEL.03;<br/>SKIN.PEN.FRSK.KER.02;<br/>SKIN.PEN.FRSK.KER.03;<br/><b>BRST.HMEC.35; BRST.MYO;</b><br/>BRN.GANGEM.DR.NRSPHR;<br/>BRN.CRTX.DR.NRSPHR; THYM;<br/>THYM.FET; BRN.HIPP.MID;<br/>BRN.SUB.NIG; BRN.ANT.CAUD;<br/>BRN.CING.GYR;<br/>BRN.DL.PRFRTL.CRTX;</p> | <p>IPSC.DF.19.11;<br/>BLD.PER.MONUC.PC;<br/>BLD.CD3.PPC;<br/>BLD.CD4.CD25I.CD127.TME<br/>MPC; BLD.CD3.CPC;<br/>BLD.CD4.CD25.CD127M.TRE<br/>GPC; BLD.CD4.CD25M.TPC;<br/>BLD.CD4.CD25M.CD45RA.N<br/>PC;<br/>BLD.CD4.CD25M.IL17M.PL.T<br/>PC;<br/>BLD.CD4.CD25M.IL17P.PL.T<br/>PC;<br/>BLD.CD4.CD25M.CD45RO.M<br/>PC; BLD.CD4.MPC;<br/>BLD.CD8.MPC;<br/>BLD.CD4.NPC;<br/>BLD.CD8.NPC; BLD.CD14.PC;<br/>BLD.CD19.CPC;<br/>BLD.CD34.PC;<br/>BLD.MOB.CD34.PC.M;<br/>BLD.MOB.CD34.PC.F;<br/>BLD.CD34.CC;<br/>BLD.CD19.PPC;<br/>BLD.CD56.PC; BLD.CD15.PC;<br/>STRM.MRW.MSC; MUS.SAT;<br/>SKIN.PEN.FRSK.FIB.02;<br/>SKIN.PEN.FRSK.KER.02;<br/>THYM; THYM.FET;<br/>BRN.HIPP.MID;<br/>BRN.ANT.CAUD;<br/>FAT.ADIP.NUC; MUS.SKLT.F;<br/>GI.DUO.SM.MUS;<br/>GI.CLN.SM.MUS;<br/>GI.RECT.SM.MUS;<br/>GI.STMC.MUS;<br/>GI.CLN.SIG;<br/>GI.CLN.MUC;<br/>GI.RECT.MUC.29;<br/>GI.RECT.MUC.31;</p> | <p>ESC.HUES6;<br/>BLD.PER.MONU<br/>C.PC;<br/>BLD.CD4.NPC;<br/>BLD.CD8.NPC;<br/>STRM.MRW.MS<br/>C;<br/>FAT.MSC.DR.AD<br/>IP; MUS.SAT;<br/>BRN.ANT.CAUD<br/>; BRN.INF.TMP;<br/>BRN.ANG.GYR;<br/>BRN.DL.PRFRT<br/>L.CRTX;<br/>BRN.DL.PRFRT<br/>L.CRTX;<br/>FAT.ADIP.NUC;<br/>MUS.SKLT.F;<br/>MUS.SKLT.M ;<br/>GI.CLN.SM.MUS<br/>;<br/>GI.RECT.SM.MU<br/>S;<br/>GI.STMC.MUS;<br/>GI.CLN.MUC;<br/>GI.RECT.MUC.2<br/>9;<br/>GI.RECT.MUC.3<br/>1;<br/>GI.STMC.MUC;<br/>GI.DUO.MUC;<br/>PANC.ISLT;<br/>LIV.ADLT</p> | <p><b>H3K4me1</b><br/>LNG.A549<br/>.ETOHO02<br/>.CNCR;<br/>BLD.DND4<br/>1.CNCR;<br/>BLD.GM1<br/>2878;<br/>CRVX.HEL<br/>AS3.CNCR<br/>;<br/>LIV.HEPG2<br/>.CNCR;<br/><b>BRST.HME<br/>C;</b><br/>MUS.HSM<br/>M;<br/>MUS.HSM<br/>MT;<br/>VAS.HUVE<br/>C;<br/>BLD.K562.<br/>CNCR;<br/>BLD.CD14.<br/>MONO;<br/>BRN.NHA;<br/>SKIN.NHD<br/>FAD;<br/>SKIN.NHE<br/>K;<br/>LNG.NHLF<br/>;<br/>BONE.OST<br/>EO</p> | <p><b>H3K4me3</b><br/>BLD.DND<br/>41.CNCR<br/>;<br/>BLD.GM<br/>12878;<br/>MUS.HS<br/>MMT;<br/>BLD.CD1<br/>4.MONO<br/>;<br/>SKIN.NH<br/>EK;<br/>BONE.O<br/>STEO.</p> <p><b>H3K9ac</b><br/>LNG.A54<br/>9.ETOHO<br/>02.CNCR<br/>;</p> | <p>ROADMAP<br/>BLD.CD3.PP<br/>C;<br/>BLD.CD3.CP<br/>C;<br/>BLD.MOB.C<br/>D34.PC.M;<br/>BLD.MOB.C<br/>D34.PC.F;<br/>BLD.CD19.P<br/>PC;<br/>BLD.CD56.P<br/>C;<br/>SKIN.PEN.F<br/>RSK.KER.02<br/>;<br/>THYM.FET;<br/>;<br/>ENCODE<br/>BLD.GM12<br/>878;<br/>SKIN.NHEK</p> |

|               |                                                                                                                                                                                                                                                                                                                                                                                                                                                                                                                                                                                                                                                                                                                                                                                                                                                                                                                                                         |                                                                                                                              |                                                                                                                                                                                                                                                                                                                                                                                                                                                                                  |                                                                                                                                                                                                                                                                                                                                                                                                                                                                                             |                                                                                                                                                                                                                                                              |                                                                                                                                                                                                 |                                                                                                                                                                                   |                                                                                                                                                                                                                                                                                                                                                                    |  |
|---------------|---------------------------------------------------------------------------------------------------------------------------------------------------------------------------------------------------------------------------------------------------------------------------------------------------------------------------------------------------------------------------------------------------------------------------------------------------------------------------------------------------------------------------------------------------------------------------------------------------------------------------------------------------------------------------------------------------------------------------------------------------------------------------------------------------------------------------------------------------------------------------------------------------------------------------------------------------------|------------------------------------------------------------------------------------------------------------------------------|----------------------------------------------------------------------------------------------------------------------------------------------------------------------------------------------------------------------------------------------------------------------------------------------------------------------------------------------------------------------------------------------------------------------------------------------------------------------------------|---------------------------------------------------------------------------------------------------------------------------------------------------------------------------------------------------------------------------------------------------------------------------------------------------------------------------------------------------------------------------------------------------------------------------------------------------------------------------------------------|--------------------------------------------------------------------------------------------------------------------------------------------------------------------------------------------------------------------------------------------------------------|-------------------------------------------------------------------------------------------------------------------------------------------------------------------------------------------------|-----------------------------------------------------------------------------------------------------------------------------------------------------------------------------------|--------------------------------------------------------------------------------------------------------------------------------------------------------------------------------------------------------------------------------------------------------------------------------------------------------------------------------------------------------------------|--|
|               | <p>BLD.CD4.CD25M.IL17M.PL.TPC;<br/>BLD.CD4.CD25M.CD45RO.MPC;<br/>BLD.CD4.MPC; BLD.CD8.MPC;<br/>BLD.CD4.NPC; BLD.CD19.CPC;<br/>BLD.MOB.CD34.PC.M;<br/>BLD.MOB.CD34.PC.F; BLD.CD34.CC;<br/>BLD.CD19.PPC; BLD.CD56.PC;<br/>BLD.CD15.PC; THYM.FET)</p> <p><b>2_PromU</b><br/>(BLD.CD14.PC)</p> <p><b>9_TxReg</b><br/>(GI.RECT.MUC.29; GI.DUO.MUC; SPLN)</p> <p><b>14_EnhA2</b><br/>(STRM.CHON.MRW.DR.MSC; MUS.SAT;<br/>SKIN.PEN.FRSK.KER.02;<br/>SKIN.PEN.FRSK.KER.03; <b>BRST.HMEC.35</b>;<br/><b>BRST.MYO</b>; BRN.HIPP.MID;<br/>BRN.DL.PRFRTL.CRTX; MUS.SKLT.F;<br/>MUS.SKLT.M; MUS.TRNK.FET;<br/>MUS.LEG.FET; GI.CLN.SM.MUS;<br/>GI.RECT.SM.MUS; GI.STMC.MUS;<br/>GI.S.INT.FET; GI.L.INT.FET; GI.CLN.MUC;<br/>GI.STMC.MUC; GI.DUO.MUC; KID.FET;<br/>LNG.FET; ADRL.GLND.FET; PLCNT.FET)</p> <p><b>16_EnhW1</b><br/>(BRN.SUB.NIG; BRN.ANT.CAUD;<br/>BRN.CING.GYR; BRN.INF.TMP;<br/>BRN.ANG.GYR; BRN.FET.M;<br/>MUS.PSOAS; GI.STMC.FET;<br/>PLCNT.AMN)</p> |                                                                                                                              | <p>FAT.ADIP.NUC; MUS.PSOAS;<br/>MUS.SKLT.F; MUS.TRNK.FET;<br/>MUS.LEG.FET; HRT.FET;<br/>HRT.ATR.R; HRT.VENT.L;<br/>HRT.VNT.R; GI.DUO.SM.MUS;<br/>GI.CLN.SM.MUS;<br/>GI.RECT.SM.MUS; GI.STMC.MUS;<br/>GI.STMC.FET; GI.S.INT.FET;<br/>GI.L.INT.FET; GI.S.INT; GI.CLN.SIG;<br/>GI.CLN.MUC; GI.RECT.MUC.29;<br/>GI.RECT.MUC.31; GI.STMC.MUC;<br/>GI.DUO.MUC; GI.ESO;<br/>GI.STMC.GAST; PLCNT.AMN;<br/>LNG.FET; OVRY; ADRL.GLND.FET;<br/>PLCNT.FET; LIV.ADLT; PANC; LNG;<br/>SPLN</p> | <p>BLD.CD56.PC;<br/>BLD.CD15.PC;<br/>STRM.MRW.<br/>MSC;<br/>MUS.SAT;<br/>SKIN.PEN.FRS<br/>K.FIB.02;<br/>SKIN.PEN.FRS<br/>K.KER.02;<br/>THYM;<br/>THYM.FET;<br/>BRN.HIPP.MID<br/>;<br/>BRN.ANT.CAU<br/>D;<br/>FAT.ADIP.NUC<br/>; MUS.SKLT.F;<br/>GI.DUO.SM.M<br/>US;<br/>GI.CLN.SM.M<br/>US;<br/>GI.RECT.SM.M<br/>US;<br/>GI.STMC.MUS;<br/>GI.CLN.SIG;<br/>GI.CLN.MUC;<br/>GI.RECT.MUC.<br/>29;<br/>GI.RECT.MUC.<br/>31;<br/>GI.STMC.MUC<br/>;<br/>GI.DUO.MUC;<br/>GI.ESO;<br/>LIV.ADLT.</p> | <p>GI.STMC.MUC;<br/>GI.DUO.MUC; GI.ESO;<br/>LIV.ADLT.</p>                                                                                                                                                                                                    |                                                                                                                                                                                                 | <p><b>H3K27ac</b><br/>BLD.DND4<br/>1.CNCR;<br/>BLD.GM1<br/>2878;<br/>MUS.HSM<br/>MT;<br/>BLD.K562.<br/>CNCR;<br/>BLD.CD14.<br/>MONO;<br/>SKIN.NHE<br/>K;<br/>BONE.OST<br/>EO.</p> | <p>BLD.DND<br/>41.CNCR<br/>;<br/>BLD.GM<br/>12878;<br/>CRVX.HE<br/>LAS3.CN<br/>CR;<br/>LIV.HEP<br/>G2.CNCR<br/>;<br/><b>BRST.H<br/>MEC</b>;<br/>MUS.HS<br/>MM;<br/>MUS.HS<br/>MMT;<br/>VAS.HUV<br/>EC;<br/>BLD.K56<br/>2.CNCR;<br/>BLD.CD1<br/>4.MONO<br/>;<br/>BRN.NH<br/>A;<br/>SKIN.NH<br/>DFAD;<br/>SKIN.NH<br/>EK;<br/>LNG.NHL<br/>F;<br/>BONE.O<br/>STEO</p> |  |
| rs27063<br>96 | <p><b>12_TxEnhW</b><br/>(BLD.PER.MONUC.PC; BLD.CD3.CPC;<br/>THYM; BRN.HIPP.MID)</p> <p><b>9_TxReg</b><br/>(BLD.CD3.PPC; BLD.CD56.PC;<br/>BLD.CD15.PC; GI.DUO.MUC; LIV.ADLT;</p> <p>10_TxEnh5<br/>BLD.CD4.CD25I.CD127.TMEMPC;<br/>BLD.CD4.CD25.CD127M.TREGPC;<br/>BLD.CD4.CD25M.TPC;</p>                                                                                                                                                                                                                                                                                                                                                                                                                                                                                                                                                                                                                                                                 | <p><b>13_EnhA1</b><br/>(BLD.DND4<br/>1.CNCR)</p> <p><b>10_TxEnh<br/>W2</b><br/>(BLD.GM12<br/>878)</p> <p><b>17_EnhW2</b></p> | <p>LNG.IMR90; IPSC.DF.19.11;<br/>ESDR.CD56.MESO;<br/>ESDR.CD56.ECTO;<br/>ESDR.H1.BMP4.TROP;<br/>ESDR.H1.MSC;<br/>BLD.PER.MONUC.PC;<br/>BLD.CD3.PPC;<br/>BLD.CD4.CD25I.CD127.TMEMPC;<br/>BLD.CD3.CPC;<br/>BLD.CD4.CD25.CD127M.TREGPC;<br/>BLD.CD4.CD25M.TPC;<br/>BLD.CD4.CD25M.CD45RA.NPC;</p>                                                                                                                                                                                    | <p>BLD.CD4.CD25<br/>I.CD127.TME<br/>MPC;<br/>BLD.CD4.CD25<br/>M.IL17P.PL.TP<br/>C;<br/>BLD.CD4.CD25<br/>M.CD45RO.M<br/>PC;<br/>BLD.CD4.MPC;<br/>BLD.CD8.MPC;<br/>BLD.MOB.CD3</p>                                                                                                                                                                                                                                                                                                            | <p>ESDR.H1.MSC;<br/>BLD.PER.MONUC.PC;<br/>BLD.CD3.PPC;<br/>BLD.CD4.CD25I.CD127.TME<br/>MPC;<br/>BLD.CD4.CD25.CD127M.TRE<br/>GPC; BLD.CD4.CD25M.TPC;<br/>BLD.CD4.CD25M.CD45RA.N<br/>PC;<br/>BLD.CD4.CD25M.IL17M.PL.T<br/>PC;<br/>BLD.CD4.CD25M.IL17P.PL.T</p> | <p>ESDR.H1.NEUR.<br/>PROG;<br/>BLD.PER.MONU<br/>C.PC;<br/>BLD.CD4.NPC;<br/>BRN.ANG.GYR;<br/>FAT.ADIP.NUC;<br/>MUS.SKLT.M;<br/>HRT.FET;<br/>GI.CLN.SM.MUS<br/>; GI.STMC.MUS;<br/>GI.CLN.MUC;</p> | <p><b>H3K4me1</b><br/>LNG.A549<br/>.ETOH002<br/>.CNCR;<br/>BLD.DND4<br/>1.CNCR;<br/>BLD.GM1<br/>2878;<br/>CRVX.HEL<br/>AS3.CNCR<br/>;<br/>LIV.HEPG2</p>                           | <p><b>H3K4me<br/>3</b><br/>BLD.CD1<br/>4.MONO<br/>.<br/><b>H3K9ac</b><br/>BLD.DND<br/>41.CNCR<br/>;<br/>BLD.CD1</p>                                                                                                                                                                                                                                                |  |

|               |                                                                                                                                                                                                                                                                                                                                                                                                                                                                                                                                                                                                                                                                                                                                                                                                                                                                            |                                                                                                                                                        |                                                                                                                                                                                                                                                                                                                                                                                                                                                                                                                                                                                                                                                                                                                                                                                                                                                                                                                                                                                                                                              |                                                                                                                                                                                                                                              |                                                                                                                                                                                                                                                                                                                                                                                                                                                                                                                                                                                                                |                                                                                                                                                                                                                                                                                                                     |                                                                                                                              |                                                                                                               |  |
|---------------|----------------------------------------------------------------------------------------------------------------------------------------------------------------------------------------------------------------------------------------------------------------------------------------------------------------------------------------------------------------------------------------------------------------------------------------------------------------------------------------------------------------------------------------------------------------------------------------------------------------------------------------------------------------------------------------------------------------------------------------------------------------------------------------------------------------------------------------------------------------------------|--------------------------------------------------------------------------------------------------------------------------------------------------------|----------------------------------------------------------------------------------------------------------------------------------------------------------------------------------------------------------------------------------------------------------------------------------------------------------------------------------------------------------------------------------------------------------------------------------------------------------------------------------------------------------------------------------------------------------------------------------------------------------------------------------------------------------------------------------------------------------------------------------------------------------------------------------------------------------------------------------------------------------------------------------------------------------------------------------------------------------------------------------------------------------------------------------------------|----------------------------------------------------------------------------------------------------------------------------------------------------------------------------------------------------------------------------------------------|----------------------------------------------------------------------------------------------------------------------------------------------------------------------------------------------------------------------------------------------------------------------------------------------------------------------------------------------------------------------------------------------------------------------------------------------------------------------------------------------------------------------------------------------------------------------------------------------------------------|---------------------------------------------------------------------------------------------------------------------------------------------------------------------------------------------------------------------------------------------------------------------------------------------------------------------|------------------------------------------------------------------------------------------------------------------------------|---------------------------------------------------------------------------------------------------------------|--|
|               | <p>BLD.CD4.CD25M.CD45RA.NPC;<br/>BLD.CD4.CD25M.IL17M.PL.TPC;<br/>BLD.CD4.CD25M.IL17P.PL.TPC;<br/>BLD.CD4.CD25M.CD45RO.MPC;<br/>BLD.CD4.MPC; BLD.CD8.MPC;<br/>BLD.CD4.NPC; BLD.CD8.NPC;<br/>BLD.CD14.PC; BLD.CD19.CPC;<br/>BLD.CD34.PC; BLD.MOB.CD34.PC.M;<br/>BLD.MOB.CD34.PC.F; BLD.CD34.CC;<br/>BLD.CD19.PPC; THYM.FET;<br/>GI.DUO.SM.MUS; GI.S.INT.FET;<br/>GI.S.INT; GI.RECT.MUC.29)</p> <p><b>17_EmhW2</b><br/>(BRST.MYO; BRN.SUB.NIG;<br/>BRN.ANT.CAUD; BRN.CING.GYR;<br/>BRN.INF.TMP; MUS.SKLT.F;<br/>MUS.SKLT.M; MUS.LEG.FET;<br/>HRT.VNT.R; GI.RECT.SM.MUS;<br/>GI.STMC.MUS; GI.CLN.SM.MUS;<br/>GI.ESO;<br/>GI.STMC.GAST; KID.FET; LNG.FET;<br/>ADRL.GLND.FET; PANC; LNG; SPLN).</p> <p><b>15_EnhAF</b><br/>(FAT.ADIP.NUC; GI.CLN.SM.MUS;<br/>GI.L.INT.FET; GI.CLN.SIG;<br/>GI.RECT.MUC.31; GI.STMC.MUC)</p> <p><b>11_TxEnh3</b><br/>(GI.STMC.FET; PLCNT.FET)</p> | <p>(CRVX.HELA<br/>S3.CNCR;<br/>BLD.K562.C<br/>NCR)</p> <p><b>15_EnhAF</b><br/>(LIV.HEPG2.<br/>CNCR)</p> <p><b>9_TxReg</b><br/>(BLD.CD14.<br/>MONO)</p> | <p>BLD.CD4.CD25M.IL17M.PL.TPC;<br/>BLD.CD4.CD25M.IL17P.PL.TPC;<br/>BLD.CD4.CD25M.CD45RO.MPC;<br/>BLD.CD4.MPC; BLD.CD8.MPC;<br/>BLD.CD4.NPC; BLD.CD8.NPC;<br/>BLD.CD14.PC; BLD.CD19.CPC;<br/>BLD.CD34.PC;<br/>BLD.MOB.CD34.PC.M;<br/>BLD.MOB.CD34.PC.F;<br/>BLD.CD34.CC; BLD.CD19.PPC;<br/>BLD.CD56.PC; BLD.CD15.PC;<br/>STRM.MRW.MSC;<br/>SKIN.PEN.FRSK.FIB.01;<br/>SKIN.PEN.FRSK.FIB.02;<br/>SKIN.PEN.FRSK.KER.03;<br/><b>BRST.MYO</b>;<br/>BRN.GANGEM.DR.NRSPHR;<br/>THYM; THYM.FET; BRN.HIPP.MID;<br/>BRN.SUB.NIG; BRN.ANT.CAUD;<br/>BRN.CING.GYR;<br/>BRN.DL.PRFRTNL.CRTX;<br/>FAT.ADIP.NUC; MUS.SKLT.F;<br/>MUS.SKLT.M; MUS.TRNK.FET;<br/>MUS.LEG.FET; HRT.FET;<br/>HRT.ATR.R; HRT.VENT.L;<br/>HRT.VNT.R; GI.DUO.SM.MUS;<br/>GI.CLN.SM.MUS;<br/>GI.RECT.SM.MUS; GI.STMC.MUS;<br/>GI.STMC.FET; GI.S.INT.FET;<br/>GI.L.INT.FET; GI.S.INT; GI.CLN.SIG;<br/>GI.CLN.MUC; GI.RECT.MUC.29;<br/>GI.RECT.MUC.31; GI.STMC.MUC;<br/>GI.DUO.MUC; GI.ESO;<br/>GI.STMC.GAST; LNG.FET;<br/>ADRL.GLND.FET; PLCNT.FET;<br/>LIV.ADLT; PANC; LNG; SPLN</p> | <p>4.PC.M;<br/>BLD.MOB.CD3<br/>4.PC.F;<br/>BLD.CD15.PC;<br/>GI.DUO.SM.M<br/>US;<br/>GI.CLN.SM.M<br/>US;<br/>GI.RECT.SM.M<br/>US;<br/>GI.STMC.MUS;<br/>GI.RECT.MUC.<br/>29;<br/>GI.STMC.MUC<br/>;<br/>GI.DUO.MUC;<br/>LIV.ADLT;<br/>PANC.</p> | <p>PC;<br/>BLD.CD4.CD25M.CD45RO.M<br/>PC; BLD.CD4.MPC;<br/>BLD.CD8.MPC;<br/>BLD.CD4.NPC;<br/>BLD.CD8.NPC; BLD.CD14.PC;<br/>BLD.MOB.CD34.PC.F;<br/>BLD.CD19.PPC;<br/>BLD.CD56.PC;<br/>SKIN.PEN.FRSK.FIB.01;<br/>THYM; THYM.FET;<br/>BRN.HIPP.MID;<br/>BRN.ANT.CAUD;<br/>BRN.CING.GYR;<br/>FAT.ADIP.NUC; MUS.PSOAS;<br/>MUS.SKLT.F; HRT.ATR.R;<br/>HRT.VNT.R;<br/>GI.DUO.SM.MUS;<br/>GI.RECT.SM.MUS;<br/>GI.STMC.MUS;<br/>GI.STMC.FET; GI.S.INT.FET;<br/>GI.L.INT.FET; GI.S.INT;<br/>GI.CLN.SIG; GI.CLN.MUC;<br/>GI.RECT.MUC.29;<br/>GI.RECT.MUC.31; GI.ESO;<br/>GI.STMC.GAST; PLCNT.FET;<br/>LIV.ADLT; LNG.</p> | <p>GI.RECT.MUC.2<br/>9;<br/>GI.RECT.MUC.3<br/>1;<br/>GI.STMC.MUC;<br/>GI.DUO.MUC;<br/>LNG.FET;<br/>LIV.ADLT.</p> <p>.CNCR;<br/><b>BRST.HME<br/>C</b>;<br/>MUS.HSM<br/>MT;<br/>BLD.CD14.<br/>MONO;<br/>LNG.NHLF<br/>.</p> <p><b>H3K27ac</b><br/>BLD.DND4<br/>1.CNCR;<br/>BLD.CD14.<br/>MONO;<br/>BONE.OST<br/>EO</p> | <p>4.MONO<br/>.</p>                                                                                                          |                                                                                                               |  |
| rs25220<br>52 | <p><b>17_EnhW2</b><br/>(ESDR.H1.BMP4.TROP;<br/>SKIN.PEN.FRSK.FIB.02;<br/>SKIN.PEN.FRSK.MEL.01; <b>BRST.MYO</b>;<br/>BRN.CRTX.DR.NRSPHR; BRN.SUB.NIG;<br/>BRN.ANT.CAUD; BRN.CING.GYR;<br/>BRN.INF.TMP; BRN.ANG.GYR;<br/>BRN.DL.PRFRTNL.CRTX;<br/>BRN.GRM.MTRX; BRN.FET.M;<br/>MUS.PSOAS; HRT.ATR.R;</p>                                                                                                                                                                                                                                                                                                                                                                                                                                                                                                                                                                     | <p><b>9_TxReg</b><br/>(BLD.DND4<br/>1.CNCR)</p> <p><b>10_TxEnh5</b><br/>(BLD.GM12<br/>878)</p> <p><b>15_EnhAF</b></p>                                  | <p>ESC.4STAR; IPSC.20B; IPSC.15b;<br/>IPSC.DF.19.11; ESDR.CD56.ECTO;<br/>ESDR.H1.MSC;<br/>BLD.PER.MONUC.PC;<br/>BLD.CD3.PPC;<br/>BLD.CD4.CD25I.CD127.TMEMPC;<br/>BLD.CD3.CPC;<br/>BLD.CD4.CD25.CD127M.TREGPC;<br/>BLD.CD4.CD25M.TPC;<br/>BLD.CD4.CD25M.CD45RA.NPC;</p>                                                                                                                                                                                                                                                                                                                                                                                                                                                                                                                                                                                                                                                                                                                                                                       | <p>BLD.CD4.CD25<br/>I.CD127.TME<br/>MPC;<br/>BLD.CD4.CD25<br/>.CD127M.TRE<br/>GPC;<br/>BLD.CD4.CD25<br/>M.IL17M.PL.T<br/>PC;<br/>BLD.CD4.CD25</p>                                                                                            | <p>BLD.PER.MONUC.PC;<br/>BLD.CD3.PPC;<br/>BLD.CD4.CD25I.CD127.TME<br/>MPC;<br/>BLD.CD4.CD25.CD127M.TRE<br/>GPC; BLD.CD4.CD25M.TPC;<br/>BLD.CD4.CD25M.CD45RA.N<br/>PC;<br/>BLD.CD4.CD25M.IL17M.PL.T<br/>PC;</p>                                                                                                                                                                                                                                                                                                                                                                                                 | <p>ESC.HUES6;<br/>BRN.SUB.NIG;<br/>BRN.ANT.CAUD<br/>; BRN.INF.TMP;<br/>BRN.ANG.GYR;<br/>FAT.ADIP.NUC;<br/>GI.CLN.SM.MUS<br/>;<br/>GI.RECT.SM.MU<br/>S;<br/>GI.CLN.MUC;</p>                                                                                                                                          | <p><b>H3K4me1</b><br/>BLD.DND4<br/>1.CNCR;<br/>BLD.GM1<br/>2878;<br/>LIV.HEPG2<br/>.CNCR;<br/>MUS.HSM<br/>M;<br/>MUS.HSM</p> | <p><b>H3K4me<br/>3</b><br/>BLD.DND<br/>41.CNCR<br/>;<br/>BLD.K56<br/>2.CNCR;<br/>BLD.CD1<br/>4.MONO<br/>;</p> |  |

|                                                                                                                                                                                                                                                                                                                                                                                                                                                                                                                                                                                                                                                                                                                                                                                                                                                                                                                                                                                                                                                                                                                                                                                                                |                                                                                                                                |                                                                                                                                                                                                                                                                                                                                                                                                                                                                                                                                                                                                                                                                                                                                                                                                                                                                                                                                                                                |                                                                                                                                                                                                                                                                                         |                                                                                                                                                                                                                                                                                                                                                                                                                                                                                                                                                                                                                                                                                                             |                                                                                                                                             |                                                                                                                                 |                                                                                                                                                          |  |
|----------------------------------------------------------------------------------------------------------------------------------------------------------------------------------------------------------------------------------------------------------------------------------------------------------------------------------------------------------------------------------------------------------------------------------------------------------------------------------------------------------------------------------------------------------------------------------------------------------------------------------------------------------------------------------------------------------------------------------------------------------------------------------------------------------------------------------------------------------------------------------------------------------------------------------------------------------------------------------------------------------------------------------------------------------------------------------------------------------------------------------------------------------------------------------------------------------------|--------------------------------------------------------------------------------------------------------------------------------|--------------------------------------------------------------------------------------------------------------------------------------------------------------------------------------------------------------------------------------------------------------------------------------------------------------------------------------------------------------------------------------------------------------------------------------------------------------------------------------------------------------------------------------------------------------------------------------------------------------------------------------------------------------------------------------------------------------------------------------------------------------------------------------------------------------------------------------------------------------------------------------------------------------------------------------------------------------------------------|-----------------------------------------------------------------------------------------------------------------------------------------------------------------------------------------------------------------------------------------------------------------------------------------|-------------------------------------------------------------------------------------------------------------------------------------------------------------------------------------------------------------------------------------------------------------------------------------------------------------------------------------------------------------------------------------------------------------------------------------------------------------------------------------------------------------------------------------------------------------------------------------------------------------------------------------------------------------------------------------------------------------|---------------------------------------------------------------------------------------------------------------------------------------------|---------------------------------------------------------------------------------------------------------------------------------|----------------------------------------------------------------------------------------------------------------------------------------------------------|--|
| <p>GI.RECT.SM.MUS; GI.ESO; PLCNT.AMN;<br/>KID.FET; LNG.FET; OVRY; PANC.ISLT)</p> <p><b>10_TxEnh5</b><br/>(BLD.PER.MONUC.PC; BLD.CD3.PPC;<br/>BLD.CD4.CD25I.CD127.TMEMPC;<br/>BLD.CD4.CD25.CD127M.TREGPC;<br/>BLD.CD4.CD25M.TPC;<br/>BLD.CD4.CD25M.CD45RA.NPC;<br/>BLD.CD4.CD25M.IL17M.PL.TPC;<br/>BLD.CD4.CD25M.IL17P.PL.TPC;<br/>BLD.CD4.CD25M.CD45RO.MPC;<br/>BLD.CD4.MPC; BLD.CD8.MPC;<br/>BLD.CD4.NPC; BLD.CD8.NPC;<br/>BLD.CD14.PC; BLD.CD19.CPC;<br/>BLD.CD34.PC; BLD.CD19.PPC;<br/>BLD.CD56.PC; THYM; THYM.FET;<br/>MUS.LEG.FET; HRT.VNT.R;<br/>GI.DUO.SM.MUS; GI.CLN.SM.MUS;<br/>GI.STMC.FET; GI.CLN.SIG;<br/>GI.RECT.MUC.29; SPLN)</p> <p><b>12_TxEnhW</b><br/>(BLD.CD3.CPC; SKIN.PEN.FRSK.FIB.01;<br/>BRN.HIPP.MID; MUS.SKLT.M)</p> <p><b>9_TxReg</b><br/>(BLD.MOB.CD34.PC.M;<br/>BLD.MOB.CD34.PC.F; BLD.CD34.CC;<br/>BLD.CD15.PC; GI.S.INT.FET;<br/>GI.DUO.MUC)</p> <p><b>15_EnhW2</b><br/>(FAT.ADIP.NUC; MUS.SKLT.F;<br/>MUS.TRNK.FET; HRT.VENT.L; GI.S.INT;<br/>GI.RECT.MUC.31; GI.STMC.MUC;<br/>ADRL.GLND.FET; PANC; LNG)</p> <p><b>11_TxEnh3</b><br/>(GI.STMC.MUS; GI.STMC.GAST;<br/>PLCNT.FET;</p> <p><b>13_EnhA1</b><br/>(GI.L.INT.FET; LIV.ADLT)</p> <p><b>14_EnhA2</b><br/>(GI.CLN.MUC)</p> | <p>(LIV.HEPG2.<br/>CNCR)</p> <p><b>15_EnhAF</b><br/>(BLD.K562.<br/>CNCR)</p> <p><b>10_TxEnhAF</b><br/>(BLD.CD14.<br/>MONO)</p> | <p>BLD.CD4.CD25M.IL17M.PL.TPC;<br/>BLD.CD4.CD25M.IL17P.PL.TPC;<br/>BLD.CD4.CD25M.CD45RO.MPC;<br/>BLD.CD4.MPC; BLD.CD8.MPC;<br/>BLD.CD4.NPC; BLD.CD8.NPC;<br/>BLD.CD14.PC; BLD.CD19.CPC;<br/>BLD.CD34.PC;<br/>BLD.MOB.CD34.PC.M;<br/>BLD.MOB.CD34.PC.F;<br/>BLD.CD34.CC; BLD.CD19.PPC;<br/>BLD.CD56.PC; BLD.CD15.PC;<br/>SKIN.PEN.FRSK.FIB.02;<br/><b>BRST.MYO</b>; THYM; THYM.FET;<br/>BRN.HIPP.MID; BRN.SUB.NIG;<br/>BRN.ANT.CAUD; BRN.INF.TMP;<br/>BRN.ANG.GYR;<br/>BRN.DL.PRFRTNL.CRTX;<br/>BRN.FET.F; BRN.FET.M;<br/>FAT.ADIP.NUC; MUS.SKLT.F;<br/>MUS.SKLT.M; MUS.TRNK.FET;<br/>MUS.LEG.FET; HRT.ATR.R;<br/>HRT.VENT.L; HRT.VNT.R;<br/>GI.DUO.SM.MUS;<br/>GI.CLN.SM.MUS;<br/>GI.RECT.SM.MUS; GI.STMC.MUS;<br/>GI.STMC.FET; GI.S.INT.FET;<br/>GI.L.INT.FET; GI.S.INT; GI.CLN.SIG;<br/>GI.CLN.MUC; GI.RECT.MUC.29;<br/>GI.RECT.MUC.31; GI.STMC.MUC;<br/>GI.DUO.MUC; GI.ESO;<br/>GI.STMC.GAST; KID.FET; LNG.FET;<br/>PANC.ISLT; PLCNT.FET; LIV.ADLT;<br/>PANC; LNG; SPLN</p> | <p>M.IL17P.PL.TP<br/>C;<br/>BLD.CD4.MPC;<br/>BLD.MOB.CD3<br/>4.PC.F;<br/>BLD.CD15.PC;<br/>SKIN.PEN.FRS<br/>K.FIB.01;<br/>SKIN.PEN.FRS<br/>K.FIB.02;<br/>GI.DUO.SM.M<br/>US;<br/>GI.CLN.SM.M<br/>US;<br/>GI.RECT.SM.M<br/>US;<br/>GI.CLN.MUC;<br/>GI.DUO.MUC;<br/>LIV.ADLT;<br/>SPLN</p> | <p>BLD.CD4.CD25M.IL17P.PL.T<br/>PC;<br/>BLD.CD4.CD25M.CD45RO.M<br/>PC; BLD.CD4.MPC;<br/>BLD.CD8.MPC;<br/>BLD.CD4.NPC;<br/>BLD.CD8.NPC;<br/>BLD.MOB.CD34.PC.F;<br/>BLD.CD19.PPC;<br/>BLD.CD56.PC;<br/>SKIN.PEN.FRSK.FIB.02;<br/>THYM; THYM.FET;<br/>BRN.HIPP.MID;<br/>BRN.SUB.NIG;<br/>BRN.ANT.CAUD;<br/>BRN.CING.GYR;<br/>BRN.INF.TMP;<br/>BRN.DL.PRFRTNL.CRTX;<br/>FAT.ADIP.NUC; MUS.PSOAS;<br/>MUS.SKLT.F; MUS.LEG.FET;<br/>HRT.VENT.L; HRT.VNT.R;<br/>GI.DUO.SM.MUS;<br/>GI.CLN.SM.MUS;<br/>GI.STMC.MUS;<br/>GI.STMC.FET; GI.S.INT.FET;<br/>GI.L.INT.FET; GI.S.INT;<br/>GI.CLN.SIG; GI.CLN.MUC;<br/>GI.RECT.MUC.29;<br/>GI.RECT.MUC.31; GI.ESO;<br/>GI.STMC.GAST; PLCNT.FET;<br/>LIV.ADLT; LNG; SPLN</p> | <p>GI.RECT.MUC.2<br/>9;<br/>GI.RECT.MUC.3<br/>1;<br/>GI.STMC.MUC;<br/>GI.DUO.MUC;<br/>GI.ESO;<br/>LNG.FET;<br/>PANC.ISLT;<br/>LIV.ADLT.</p> | <p>MT;<br/>BLD.CD14.<br/>MONO.</p> <p><b>H3K27ac</b><br/>BLD.DND4<br/>1.CNCR;<br/>BLD.GM1<br/>2878;<br/>BLD.CD14.<br/>MONO.</p> | <p>BRN.NH<br/>A;<br/>SKIN.NH<br/>DFAD;<br/>SKIN.NH<br/>EK;<br/>LNG.NHL<br/>F;<br/>BONE.O<br/>STEO</p> <p><b>H3K9ac</b><br/>BLD.DND<br/>41.CNCR<br/>.</p> |  |
|----------------------------------------------------------------------------------------------------------------------------------------------------------------------------------------------------------------------------------------------------------------------------------------------------------------------------------------------------------------------------------------------------------------------------------------------------------------------------------------------------------------------------------------------------------------------------------------------------------------------------------------------------------------------------------------------------------------------------------------------------------------------------------------------------------------------------------------------------------------------------------------------------------------------------------------------------------------------------------------------------------------------------------------------------------------------------------------------------------------------------------------------------------------------------------------------------------------|--------------------------------------------------------------------------------------------------------------------------------|--------------------------------------------------------------------------------------------------------------------------------------------------------------------------------------------------------------------------------------------------------------------------------------------------------------------------------------------------------------------------------------------------------------------------------------------------------------------------------------------------------------------------------------------------------------------------------------------------------------------------------------------------------------------------------------------------------------------------------------------------------------------------------------------------------------------------------------------------------------------------------------------------------------------------------------------------------------------------------|-----------------------------------------------------------------------------------------------------------------------------------------------------------------------------------------------------------------------------------------------------------------------------------------|-------------------------------------------------------------------------------------------------------------------------------------------------------------------------------------------------------------------------------------------------------------------------------------------------------------------------------------------------------------------------------------------------------------------------------------------------------------------------------------------------------------------------------------------------------------------------------------------------------------------------------------------------------------------------------------------------------------|---------------------------------------------------------------------------------------------------------------------------------------------|---------------------------------------------------------------------------------------------------------------------------------|----------------------------------------------------------------------------------------------------------------------------------------------------------|--|



|               |                                                                                                                                                                                                                                                                                                                                                                                                                                                                                                                                                                                                                                                                                                                                                                                                                                                                                                                                                                                                                                                                                                                                                                          |                                                                                                                                                                                                                                                                           |                                                                                                                                                                                                                                                                                                                                                                                                                                                                                                                                                                                                                                                                                                                                                                                                                                                                                                                                                                                                                                                                                                                                                                                            |                                                                                                                                                                                                                                                                                                                                                                       |                                                                                                                                                                                                                                                                                                                                                                                                                                                                                                                                                                                                                                                                                                                                                                                                                          |                                                                                                                                                                                                                                                                                    |                                                                                                                                                                                                                                                                                                                                                   |                                                                                                                             |                                                                         |
|---------------|--------------------------------------------------------------------------------------------------------------------------------------------------------------------------------------------------------------------------------------------------------------------------------------------------------------------------------------------------------------------------------------------------------------------------------------------------------------------------------------------------------------------------------------------------------------------------------------------------------------------------------------------------------------------------------------------------------------------------------------------------------------------------------------------------------------------------------------------------------------------------------------------------------------------------------------------------------------------------------------------------------------------------------------------------------------------------------------------------------------------------------------------------------------------------|---------------------------------------------------------------------------------------------------------------------------------------------------------------------------------------------------------------------------------------------------------------------------|--------------------------------------------------------------------------------------------------------------------------------------------------------------------------------------------------------------------------------------------------------------------------------------------------------------------------------------------------------------------------------------------------------------------------------------------------------------------------------------------------------------------------------------------------------------------------------------------------------------------------------------------------------------------------------------------------------------------------------------------------------------------------------------------------------------------------------------------------------------------------------------------------------------------------------------------------------------------------------------------------------------------------------------------------------------------------------------------------------------------------------------------------------------------------------------------|-----------------------------------------------------------------------------------------------------------------------------------------------------------------------------------------------------------------------------------------------------------------------------------------------------------------------------------------------------------------------|--------------------------------------------------------------------------------------------------------------------------------------------------------------------------------------------------------------------------------------------------------------------------------------------------------------------------------------------------------------------------------------------------------------------------------------------------------------------------------------------------------------------------------------------------------------------------------------------------------------------------------------------------------------------------------------------------------------------------------------------------------------------------------------------------------------------------|------------------------------------------------------------------------------------------------------------------------------------------------------------------------------------------------------------------------------------------------------------------------------------|---------------------------------------------------------------------------------------------------------------------------------------------------------------------------------------------------------------------------------------------------------------------------------------------------------------------------------------------------|-----------------------------------------------------------------------------------------------------------------------------|-------------------------------------------------------------------------|
| rs27063<br>36 | <p><b>12_TxEnhW</b><br/>(BLD.PER.MONUC.PC; BLD.CD3.CPC;<br/>THYM; BRN.HIPP.MID)</p> <p><b>9_TxReg</b><br/>(BLD.CD3.PPC; BLD.CD56.PC;<br/>BLD.CD15.PC; GI.DUO.MUC; LIV.ADLT)</p> <p><b>10_TxEnhW</b><br/>(BLD.CD4.CD25I.CD127.TMEMPC;<br/>BLD.CD4.CD25.CD127M.TREGPC;<br/>BLD.CD4.CD25M.TPC;<br/>BLD.CD4.CD25M.CD45RA.NPC;<br/>BLD.CD4.CD25M.IL17M.PL.TPC;<br/>BLD.CD4.CD25M.IL17P.PL.TPC;<br/>BLD.CD4.CD25M.CD45RO.MPC;<br/>BLD.CD4.MPC; BLD.CD8.MPC;<br/>BLD.CD4.NPC; BLD.CD8.NPC;<br/>BLD.CD14.PC; BLD.CD19.CPC;<br/>BLD.CD34.PC; BLD.MOB.CD34.PC.M;<br/>BLD.MOB.CD34.PC.F; BLD.CD34.CC;<br/>BLD.CD19.PPC; THYM.FET;<br/>GI.DUO.SM.MUS; GI.S.INT.FET;<br/>GI.S.INT; GI.RECT.MUC.29)</p> <p><b>17_EnhW2</b><br/><b>BRST.MYO</b>; BRN.SUB.NIG;<br/>BRN.ANT.CAUD; BRN.CING.GYR;<br/>BRN.INF.TMP; MUS.SKLT.F;<br/>MUS.LEG.FET; MUS.SKLT.M;<br/>HRT.VNT.R; GI.RECT.SM.MUS;<br/>GI.STMC.MUS; GI.CLN.MUC; GI.ESO;<br/>GI.STMC.GAST; KID.FET; LNG.FET;<br/>ADRL.GLND.FET;<br/>PANC; LNG; SPLN)</p> <p><b>15_EnhAF</b><br/>(FAT.ADIP.NUC; GI.CLN.SM.MUS;<br/>GI.L.INT.FET; GI.CLN.SIG;<br/>GI.RECT.MUC.31; GI.STMC.MUC;</p> <p><b>11_TxEnh3</b><br/>GI.STMC.FET; PLCNT.FET)</p> | <p><b>13_EnhA1</b><br/>(BLD.DND4<br/>1.CNCR)</p> <p><b>10_TxEnh5</b><br/>(BLD.GM12<br/>878)</p> <p><b>17_EnhW2</b><br/>(CRVX.HEL<br/>S3.CNCR;<br/>BLD.K562.C<br/>NCR)</p> <p><b>15_EnhAF</b><br/>(LIV.HEPG2.<br/>CNCR)</p> <p><b>9_TxReg</b><br/>(BLD.CD14.<br/>MONO)</p> | LNG.IMR90; IPSC.DF.19.11;<br>ESDR.CD56.MESO;<br>ESDR.CD56.ECTO;<br>ESDR.H1.BMP4.TROP;<br>ESDR.H1.MSC;<br>BLD.PER.MONUC.PC;<br>BLD.CD3.PPC;<br>BLD.CD4.CD25I.CD127.TMEMPC;<br>BLD.CD3.CPC;<br>BLD.CD4.CD25.CD127M.TREGPC;<br>BLD.CD4.CD25M.TPC;<br>BLD.CD4.CD25M.CD45RA.NPC;<br>BLD.CD4.CD25M.IL17M.PL.TPC;<br>BLD.CD4.CD25M.IL17P.PL.TPC;<br>BLD.CD4.MPC; BLD.CD8.MPC;<br>BLD.CD4.NPC; BLD.CD8.NPC;<br>BLD.CD14.PC; BLD.CD19.CPC;<br>BLD.CD34.PC;<br>BLD.MOB.CD34.PC.M;<br>BLD.MOB.CD34.PC.F;<br>BLD.CD34.CC; BLD.CD19.PPC;<br>BLD.CD56.PC; BLD.CD15.PC;<br>STRM.MRW.MSC;<br>SKIN.PEN.FRSK.FIB.01;<br>SKIN.PEN.FRSK.FIB.02;<br>SKIN.PEN.FRSK.KER.03;<br><b>BRST.MYO</b> ;<br>BRN.GANGEM.DR.NRSPHR;<br>THYM; THYM.FET; BRN.HIPP.MID;<br>BRN.SUB.NIG; BRN.ANT.CAUD;<br>BRN.CING.GYR;<br>BRN.DL.PRFRTL.CRTX;<br>FAT.ADIP.NUC; MUS.SKLT.F;<br>MUS.SKLT.M; MUS.TRNK.FET;<br>MUS.LEG.FET; HRT.FET;<br>HRT.ATR.R; HRT.VENT.L;<br>HRT.VNT.R; GI.DUO.SM.MUS;<br>GI.CLN.SM.MUS;<br>GI.RECT.SM.MUS; GI.STMC.MUS;<br>GI.STMC.FET; GI.S.INT.FET;<br>GI.L.INT.FET; GI.S.INT; GI.CLN.SIG;<br>GI.CLN.MUC; GI.RECT.MUC.29;<br>GI.RECT.MUC.31; GI.STMC.MUC;<br>GI.DUO.MUC; GI.ESO;<br>GI.STMC.GAST; LNG.FET; | BLD.CD4.CD25<br>I.CD127.TME<br>MPC;<br>BLD.CD4.CD25<br>M.IL17P.PL.TP<br>C;<br>BLD.CD4.CD25<br>M.CD45RO.M<br>PC;<br>BLD.CD4.MPC;<br>BLD.CD8.MPC;<br>BLD.MOB.CD3<br>4.PC.M;<br>BLD.MOB.CD3<br>4.PC.F;<br>BLD.CD15.PC;<br>GI.DUO.SM.M<br>US;<br>GI.CLN.SM.M<br>US;<br>GI.RECT.SM.M<br>US;<br>GI.RECT.MUC.<br>29;<br>GI.STMC.MUC<br>;<br>GI.DUO.MUC;<br>LIV.ADLT;<br>PANC | ESDR.H1.MSC;<br>BLD.PER.MONUC.PC;<br>BLD.CD3.PPC;<br>BLD.CD4.CD25I.CD127.TME<br>MPC;<br>BLD.CD4.CD25.CD127M.TRE<br>GPC; BLD.CD4.CD25M.TPC;<br>BLD.CD4.CD25M.CD45RA.N<br>PC;<br>BLD.CD4.CD25M.IL17M.PL.T<br>PC;<br>BLD.CD4.CD25M.IL17P.PL.T<br>PC;<br>BLD.CD4.CD25M.CD45RO.M<br>PC; BLD.CD4.CD25M.CD45RO.MPC;<br>BLD.CD8.MPC;<br>BLD.CD4.NPC;<br>BLD.CD8.NPC; BLD.CD14.PC;<br>BLD.MOB.CD34.PC.F;<br>BLD.CD19.PPC;<br>SKIN.PEN.FRSK.FIB.01;<br>THYM; THYM.FET;<br>BRN.HIPP.MID;<br>BRN.ANT.CAUD;<br>BRN.CING.GYR;<br>FAT.ADIP.NUC; MUS.PSOAS;<br>MUS.SKLT.F; HRT.ATR.R;<br>HRT.VNT.R;<br>GI.DUO.SM.MUS;<br>GI.RECT.SM.MUS;<br>GI.STMC.MUS;<br>GI.STMC.FET; GI.S.INT.FET;<br>GI.L.INT.FET; GI.S.INT;<br>GI.CLN.SIG; GI.CLN.MUC;<br>GI.RECT.MUC.29;<br>GI.RECT.MUC.31; GI.ESO;<br>GI.STMC.GAST; PLCNT.FET;<br>LIV.ADLT; LNG; | ESDR.H1.NEUR.<br>PROG;<br>BLD.PER.MONU<br>C.PC;<br>BLD.CD4.NPC;<br>BRN.ANG.GYR;<br>FAT.ADIP.NUC;<br>MUS.SKLT.M;<br>HRT.FET;<br>GI.CLN.SM.MUS<br>; GI.STMC.MUS;<br>GI.CLN.MUC;<br>GI.RECT.MUC.2<br>9;<br>GI.RECT.MUC.3<br>1;<br>GI.STMC.MUC;<br>GI.DUO.MUC;<br>LNG.FET;<br>LIV.ADLT | <p><b>H3K4me1</b><br/>LNG.A549<br/>.ETOH002<br/>.CNCR;<br/>BLD.DND4<br/>1.CNCR;<br/>BLD.GM1<br/>2878;<br/>CRVX.HEL<br/>AS3.CNCR<br/>;<br/>LIV.HEPG2<br/>.CNCR;<br/><b>BRST.HME<br/>C</b>;<br/>MUS.HSM<br/>MT;<br/>BLD.CD14.<br/>MONO;<br/>LNG.NHLF</p> <p><b>H3K27ac</b><br/>BLD.DND4<br/>1.CNCR;<br/>BLD.CD14.<br/>MONO;<br/>BONE.OST<br/>EO</p> | <p><b>H3K4me<br/>3</b><br/>BLD.CD1<br/>4.MONO</p> <p><b>H3K9ac</b><br/>BLD.DND<br/>41.CNCR<br/>;<br/>BLD.CD1<br/>4.MONO</p> | DNase<br>ROADMAP<br>GI.S.INT.FE<br>T,<br>GI.L.INT.FE<br>T<br><br>ENCODE |
|---------------|--------------------------------------------------------------------------------------------------------------------------------------------------------------------------------------------------------------------------------------------------------------------------------------------------------------------------------------------------------------------------------------------------------------------------------------------------------------------------------------------------------------------------------------------------------------------------------------------------------------------------------------------------------------------------------------------------------------------------------------------------------------------------------------------------------------------------------------------------------------------------------------------------------------------------------------------------------------------------------------------------------------------------------------------------------------------------------------------------------------------------------------------------------------------------|---------------------------------------------------------------------------------------------------------------------------------------------------------------------------------------------------------------------------------------------------------------------------|--------------------------------------------------------------------------------------------------------------------------------------------------------------------------------------------------------------------------------------------------------------------------------------------------------------------------------------------------------------------------------------------------------------------------------------------------------------------------------------------------------------------------------------------------------------------------------------------------------------------------------------------------------------------------------------------------------------------------------------------------------------------------------------------------------------------------------------------------------------------------------------------------------------------------------------------------------------------------------------------------------------------------------------------------------------------------------------------------------------------------------------------------------------------------------------------|-----------------------------------------------------------------------------------------------------------------------------------------------------------------------------------------------------------------------------------------------------------------------------------------------------------------------------------------------------------------------|--------------------------------------------------------------------------------------------------------------------------------------------------------------------------------------------------------------------------------------------------------------------------------------------------------------------------------------------------------------------------------------------------------------------------------------------------------------------------------------------------------------------------------------------------------------------------------------------------------------------------------------------------------------------------------------------------------------------------------------------------------------------------------------------------------------------------|------------------------------------------------------------------------------------------------------------------------------------------------------------------------------------------------------------------------------------------------------------------------------------|---------------------------------------------------------------------------------------------------------------------------------------------------------------------------------------------------------------------------------------------------------------------------------------------------------------------------------------------------|-----------------------------------------------------------------------------------------------------------------------------|-------------------------------------------------------------------------|

|               |                                                                                                                                                                                                                                                                                                                                                                                                                                                                                                                                                                                                                                                                                                                                                                                                                                                                                                                                           |                                                                                                                                                                                                                                                                                                                                          |                                                                                                                                                                                                                                                                                                                                                                                                                                                                                                                                                                                                                                                                                                                                                                                                                                                                                                                                                                                                                                                                 |                                                                                                                                                                                                                                                           |                                                                                                                                                                                                                                                                                                                                                                                                                                                                                                                                                                                                                                                                                        |                                                                           |                                                                                                                                                                                                                                                                                                                                                                                                                                                                                                  |                                                            |  |
|---------------|-------------------------------------------------------------------------------------------------------------------------------------------------------------------------------------------------------------------------------------------------------------------------------------------------------------------------------------------------------------------------------------------------------------------------------------------------------------------------------------------------------------------------------------------------------------------------------------------------------------------------------------------------------------------------------------------------------------------------------------------------------------------------------------------------------------------------------------------------------------------------------------------------------------------------------------------|------------------------------------------------------------------------------------------------------------------------------------------------------------------------------------------------------------------------------------------------------------------------------------------------------------------------------------------|-----------------------------------------------------------------------------------------------------------------------------------------------------------------------------------------------------------------------------------------------------------------------------------------------------------------------------------------------------------------------------------------------------------------------------------------------------------------------------------------------------------------------------------------------------------------------------------------------------------------------------------------------------------------------------------------------------------------------------------------------------------------------------------------------------------------------------------------------------------------------------------------------------------------------------------------------------------------------------------------------------------------------------------------------------------------|-----------------------------------------------------------------------------------------------------------------------------------------------------------------------------------------------------------------------------------------------------------|----------------------------------------------------------------------------------------------------------------------------------------------------------------------------------------------------------------------------------------------------------------------------------------------------------------------------------------------------------------------------------------------------------------------------------------------------------------------------------------------------------------------------------------------------------------------------------------------------------------------------------------------------------------------------------------|---------------------------------------------------------------------------|--------------------------------------------------------------------------------------------------------------------------------------------------------------------------------------------------------------------------------------------------------------------------------------------------------------------------------------------------------------------------------------------------------------------------------------------------------------------------------------------------|------------------------------------------------------------|--|
|               |                                                                                                                                                                                                                                                                                                                                                                                                                                                                                                                                                                                                                                                                                                                                                                                                                                                                                                                                           |                                                                                                                                                                                                                                                                                                                                          | ADRL.GLND.FET; PLCNT.FET;<br>LIV.ADLT; PANC; LNG; SPLN                                                                                                                                                                                                                                                                                                                                                                                                                                                                                                                                                                                                                                                                                                                                                                                                                                                                                                                                                                                                          |                                                                                                                                                                                                                                                           |                                                                                                                                                                                                                                                                                                                                                                                                                                                                                                                                                                                                                                                                                        |                                                                           |                                                                                                                                                                                                                                                                                                                                                                                                                                                                                                  |                                                            |  |
| rs22481<br>16 | <p><b>17_EnhW2</b><br/>(ESDR.H1.MSC; BLD.PER.MONUC.PC;<br/>BLD.CD4.CD25M.IL17P.PL.TPC;<br/>BLD.CD8.MPC; BLD.CD4.NPC;<br/>BLD.CD8.NPC; BLD.CD34.PC;<br/>STRM.MRW.MSC;<br/>STRM.CHON.MRW.DR.MSC;<br/>FAT.MSC.DR.ADIP; MUS.SAT;<br/>SKIN.PEN.FRSK.FIB.01;<br/>SKIN.PEN.FRSK.FIB.02; <b>BRST.HMEC.35</b>;<br/>FAT.ADIP.NUC; GI.S.INT; GI.CLN.SIG;<br/>GI.CLN.MUC; GI.RECT.MUC.29;<br/>GI.RECT.MUC.31; GI.STMC.MUC;<br/>GI.DUO.MUC; SPLN)</p> <p><b>10_TxEnh5</b><br/>(BLD.CD3.PPC; BLD.CD4.CD25M.TPC;<br/>BLD.CD4.MPC; BLD.MOB.CD34.PC.F;<br/>BLD.CD19.PPC; BLD.CD56.PC;<br/>THYM.FET)</p> <p><b>12_TxEnhW</b><br/>(BLD.CD4.CD25I.CD127.TMEMPC;<br/>BLD.CD3.CPC;<br/>BLD.CD4.CD25.CD127M.TREGPC;<br/>BLD.CD4.CD25M.CD45RA.NPC;<br/>BLD.CD4.CD25M.IL17M.PL.TPC;<br/>BLD.CD4.CD25M.CD45RO.MPC;<br/>THYM)</p> <p><b>15_EnhAF</b><br/>(BLD.CD14.PC; BLD.CD19.CPC;<br/>BLD.MOB.CD34.PC.M; BLD.CD34.CC)</p> <p><b>9_TxReg</b><br/>(BLD.CD15.PC)</p> | <p><b>17_EnhW2</b><br/>(BLD.DND4<br/>1.CNCR;<br/><b>BRST.HMEC</b><br/>;<br/>MUS.HSM<br/>M;<br/>MUS.HSM<br/>MT;<br/>BLD.K562.C<br/>NCR;<br/>BRN.NHA;<br/>SKIN.NHDF<br/>AD;<br/>LNG.NHLF)</p> <p><b>12_TxEnhW</b><br/>(BLD.GM12<br/>878)</p> <p><b>10_TxEnh5</b><br/>(BLD.CD14.<br/>MONO)</p> <p><b>15_EnhAF</b><br/>(BONE.OST<br/>EO)</p> | <p>LNG.IMR90; ESDR.CD56.MESO;<br/>BLD.PER.MONUC.PC;<br/>BLD.CD3.PPC;<br/>BLD.CD4.CD25I.CD127.TMEMPC;<br/>BLD.CD3.CPC;<br/>BLD.CD4.CD25.CD127M.TREGPC;<br/>BLD.CD4.CD25M.TPC;<br/>BLD.CD4.CD25M.CD45RA.NPC;<br/>BLD.CD4.CD25M.IL17M.PL.TPC;<br/>BLD.CD4.CD25M.IL17P.PL.TPC;<br/>BLD.CD4.CD25M.CD45RO.MPC;<br/>BLD.CD4.MPC; BLD.CD8.MPC;<br/>BLD.CD4.NPC; BLD.CD8.NPC;<br/>BLD.CD14.PC; BLD.CD19.CPC;<br/>BLD.CD34.PC;<br/>BLD.MOB.CD34.PC.M;<br/>BLD.MOB.CD34.PC.F;<br/>BLD.CD34.CC; BLD.CD19.PPC;<br/>BLD.CD56.PC; BLD.CD15.PC;<br/>STRM.MRW.MSC;<br/>STRM.CHON.MRW.DR.MSC;<br/>FAT.ADIP.DR.MSC;<br/>FAT.MSC.DR.ADIP; MUS.SAT;<br/>SKIN.PEN.FRSK.FIB.01;<br/>SKIN.PEN.FRSK.FIB.02;<br/>SKIN.PEN.FRSK.KER.02;<br/>SKIN.PEN.FRSK.KER.03;<br/><b>BRST.HMEC.35</b>; <b>BRST.MYO</b>;<br/>THYM.FET;<br/>BRN.DL.PRFRTL.CRTX;<br/>FAT.ADIP.NUC; GI.DUO.SM.MUS;<br/>GI.CLN.SM.MUS; GI.STMC.MUS;<br/>GI.STMC.FET; GI.S.INT.FET;<br/>GI.L.INT.FET; GI.S.INT;<br/>GI.CLN.MUC; GI.RECT.MUC.29;<br/>GI.RECT.MUC.31; GI.STMC.MUC;<br/>GI.DUO.MUC; PLCNT.FET;<br/>LIV.ADLT</p> | <p>BLD.CD4.CD25<br/>M.TPC;<br/>BLD.CD8.MPC;<br/>BLD.CD4.NPC;<br/>BLD.CD19.CPC<br/>;<br/>BLD.MOB.CD3<br/>4.PC.M;<br/>BLD.CD19.PPC<br/>;<br/>BLD.CD15.PC;<br/>STRM.MRW.<br/>MSC;<br/>GI.DUO.SM.M<br/>US;<br/>GI.CLN.SIG;<br/>GI.CLN.MUC;<br/>GI.DUO.MUC</p> | <p>ESDR.H1.MSC;<br/>BLD.PER.MONUC.PC;<br/>BLD.CD3.PPC;<br/>BLD.CD4.CD25I.CD127.TME<br/>MPC;<br/>BLD.CD4.CD25.CD127M.TRE<br/>GPC; BLD.CD4.CD25M.TPC;<br/>BLD.CD4.CD25M.CD45RA.N<br/>PC;<br/>BLD.CD4.CD25M.IL17M.PL.T<br/>PC;<br/>BLD.CD4.CD25M.IL17P.PL.T<br/>PC;<br/>BLD.CD4.CD25M.CD45RO.M<br/>PC; BLD.CD4.MPC;<br/>BLD.CD8.MPC;<br/>BLD.CD8.NPC;<br/>BLD.MOB.CD34.PC.F;<br/>BLD.CD19.PPC;<br/>BLD.CD56.PC;<br/>STRM.MRW.MSC; THYM;<br/>THYM.FET; FAT.ADIP.NUC;<br/>MUS.SKL.T.F;<br/>MUS.TRNK.FET;<br/>GI.DUO.SM.MUS;<br/>GI.STMC.MUS; GI.L.INT.FET;<br/>GI.S.INT; GI.CLN.SIG;<br/>GI.CLN.MUC;<br/>GI.RECT.MUC.29; GI.ESO;<br/>ADRL.GLND.FET; PLCNT.FET;<br/>LIV.ADLT; PANC; SPLN</p> | <p>FAT.MSC.DR.AD<br/>IP; MUS.SAT;<br/>GI.RECT.MUC.2<br/>9; GI.DUO.MUC</p> | <p><b>H3K4me1</b><br/>BLD.DND4<br/>1.CNCR;<br/>BLD.GM1<br/>2878;<br/>CRVX.HEL<br/>AS3.CNCR<br/>;<br/>LIV.HEPG2<br/>.CNCR;<br/><b>BRST.HME<br/>C</b>;<br/>MUS.HSM<br/>M;<br/>MUS.HSM<br/>MT;<br/>VAS.HUVE<br/>C;<br/>BLD.CD14.<br/>MONO;<br/>BRN.NHA;<br/>SKIN.NHD<br/>FAD;<br/>SKIN.NHE<br/>K;<br/>LNG.NHLF<br/>;<br/>BONE.OST<br/>EO</p> <p><b>H3K27ac</b><br/>BLD.DND4<br/>1.CNCR;<br/>BLD.GM1<br/>2878;<br/>MUS.HSM<br/>M;<br/>MUS.HSM<br/>MT;<br/>BLD.CD14.<br/>MONO;<br/>LNG.NHLF<br/>;</p> | <p><b>BLD.DN<br/>D41.CNC<br/>R;<br/>MUS.HS<br/>MMT</b></p> |  |

|                         |                                                                                                                                                                                                                                        |                                                                                                                                                                      |                                                                                                                                                                                                                                                                                                                                                                                                                                                                                                                                                                                                                                                                             |                                                      |                                                                                                                                                                                                                                                                                                                                                 |                                                                                                                                                |                                                                                                                                                                                                                                                                                            |                                                                                                                                                                                                                                 |                          |
|-------------------------|----------------------------------------------------------------------------------------------------------------------------------------------------------------------------------------------------------------------------------------|----------------------------------------------------------------------------------------------------------------------------------------------------------------------|-----------------------------------------------------------------------------------------------------------------------------------------------------------------------------------------------------------------------------------------------------------------------------------------------------------------------------------------------------------------------------------------------------------------------------------------------------------------------------------------------------------------------------------------------------------------------------------------------------------------------------------------------------------------------------|------------------------------------------------------|-------------------------------------------------------------------------------------------------------------------------------------------------------------------------------------------------------------------------------------------------------------------------------------------------------------------------------------------------|------------------------------------------------------------------------------------------------------------------------------------------------|--------------------------------------------------------------------------------------------------------------------------------------------------------------------------------------------------------------------------------------------------------------------------------------------|---------------------------------------------------------------------------------------------------------------------------------------------------------------------------------------------------------------------------------|--------------------------|
|                         |                                                                                                                                                                                                                                        |                                                                                                                                                                      |                                                                                                                                                                                                                                                                                                                                                                                                                                                                                                                                                                                                                                                                             |                                                      |                                                                                                                                                                                                                                                                                                                                                 |                                                                                                                                                | BONE.OST<br>EO                                                                                                                                                                                                                                                                             |                                                                                                                                                                                                                                 |                          |
| <b>rs17024<br/>629</b>  | <b>14_EnhA2</b><br>(FAT.ADIP.DR.MSC); 17_EnhW2<br>(STRM.CHON.MRW.DR.MSC;<br>FAT.MSC.DR.ADIP;<br>SKIN.PEN.FRSK.FIB.02; BRN.ANT.CAUD;<br>FAT.ADIP.NUC;<br>GI.DUO.SM.MUS;GI.STMC.MUC;<br>GI.DUO.MUC) ; 18_EnhAc<br>(SKIN.PEN.FRSK.FIB.01) | <b>13_EnhA2</b><br>(CRVX.HELA<br>S3.CNCR);<br>14_EnhA2<br>(LNG.A549.<br>ETOH002.C<br>NCR;<br>LIV.HEPG2.<br>CNCR);<br>17EnhW2<br>(SKIN.NHDF<br>AD;<br>BONE.OSTE<br>O) | LNG.IMR90; ESC.WA7; ESC.I3;<br>ESC.HUES6; ESC.4STAR; IPSC.20B;<br>IPSC.18; IPSC.15b; IPSC.DF.19.11;<br>ESDR.CD56.ECTO;<br>ESDR.CD184.ENDO; BLD.CD3.PPC;<br>BLD.CD4.CD25I.CD127.TMEMPC;<br>NCR;<br>BLD.MOB.CD34.PC.F;<br>STRM.MRW.MSC;<br>FAT.ADIP.DR.MSC;<br>FAT.MSC.DR.ADIP; MUS.SAT;<br>SKIN.PEN.FRSK.FIB.01;<br>SKIN.PEN.FRSK.FIB.02;<br>BRN.HIPP.MID; BRN.ANT.CAUD;<br>BRN.ANG.GYR; BRN.GRM.MTRX;<br>FAT.ADIP.NUC; MUS.TRNK.FET;<br>MUS.LEG.FET; HRT.ATR.R;<br>HRT.VENT.L; HRT.VNT.R;<br>GI.DUO.SM.MUS;<br>GI.CLN.SM.MUS; GI.STMC.MUS;<br>GI.STMC.FET; GI.S.INT.FET;<br>GI.L.INT.FET; GI.S.INT;<br>GI.CLN.MUC; GI.RECT.MUC.29;<br>GI.STMC.MUC; GI.DUO.MUC;<br>PLCNT.AMN | ESC.WA7;<br>SKIN.PEN.FR<br>K.FIB.02;<br>GI.STMC.MUS; | LNG.IMR90; ESC.HUES48;<br>ESC.H1; IPSC.20B;<br>IPSC.DF.19.11;<br>ESDR.CD56.MESO;<br>ESDR.H1.BMP4.MESO;<br>ESDR.H1.MSC;<br>BLD.CD4.CD25I.CD127.TME<br>MPC; SKIN.PEN.FRSK.FIB.02;<br>BRN.ANT.CAUD;<br>BRN.CING.GYR;<br>BRN.INF.TMP;<br>FAT.ADIP.NUC; HRT.ATR.R;<br>GI.DUO.SM.MUS;<br>GI.RECT.SM.MUS;<br>GI.STMC.MUS; GI.S.INT;<br>GI.CLN.SIG; LNG | ESC.HUES6;<br>IPSC.15b;<br>BLD.PER.MONU<br>C.PC;<br>BRN.CING.GYR;<br>BRN.ANG.GYR;<br>MUS.SKLT.M;<br>GI.STMC.MUS;<br>GI.STMC.MUC;<br>GI.DUO.MUC | <b>H3K4me1</b><br>(LNG.A54<br>9.ETOH00<br>2.CNCR;<br>CRVX.HEL<br>AS3.CNCR<br>;<br>LIV.HEPG2<br>.CNCR;<br>MUS.HSM<br>MT;<br>SKIN.NHD<br>FAD;<br>LNG.NHLF<br>;<br>BONE.OST<br>EO)<br><br><b>H3K27ac</b><br>LNG.A549<br>.ETOH002<br>.CNCR;<br>CRVX.HEL<br>AS3.CNCR<br>;<br>LIV.HEPG2<br>.CNCR | <b>H3K4me<br/>3</b><br>LNG.A54<br>9.ETOH0<br>02.CNCR<br>;<br>CRVX.HE<br>LAS3.CN<br>CR;<br>LIV.HEP<br>G2.CNCR<br><br><b>H3K9ac</b><br>LNG.A54<br>9.ETOH0<br>02.CNCR<br>;<br>CRVX.HE<br>LAS3.CN<br>CR;<br>LIV.HEP<br>G2.CNCR<br>; | SKIN.PEN.F<br>RSK.FIB.01 |
| <b>rs58434<br/>753</b>  | None                                                                                                                                                                                                                                   | None                                                                                                                                                                 | SKIN.PEN.FRSK.FIB.02;<br>MUS.TRNK.FET; SPLN                                                                                                                                                                                                                                                                                                                                                                                                                                                                                                                                                                                                                                 | None                                                 | SKIN.PEN.FRSK.FIB.02;<br>MUS.TRNK.FET; SPLN                                                                                                                                                                                                                                                                                                     | GI.STMC.MUS;                                                                                                                                   | <b>H3K4me1</b><br>None<br><br><b>H3K27ac</b><br>None                                                                                                                                                                                                                                       | <b>H3K4me<br/>3</b><br>None<br><br><b>H3K9ac</b><br>CRVX.HE<br>LAS3.CN<br>CR;                                                                                                                                                   |                          |
| <b>rs14889<br/>8127</b> | None                                                                                                                                                                                                                                   | None                                                                                                                                                                 | SKIN.PEN.FRSK.FIB.02;<br><br>MUS.TRNK.FET; SPLN                                                                                                                                                                                                                                                                                                                                                                                                                                                                                                                                                                                                                             | None                                                 | SKIN.PEN.FRSK.FIB.02;                                                                                                                                                                                                                                                                                                                           | None                                                                                                                                           | <b>H3K4me1</b><br>None<br><br><b>H3K27ac</b><br>none                                                                                                                                                                                                                                       | <b>H3K4me<br/>3</b><br>None<br><br><b>H3K9ac</b><br>CRVX.HE<br>LAS3.CN<br>CR;                                                                                                                                                   |                          |

|               |                                                                                                  |      |                                                                                                                                                                                                                                                                                                                                                  |                                                                                                                              |                                                                                                                                                                                                                                                                                                                                                                                                                                                                                 |                                                                                                                                                                                                                                                                                                  |                                                                                  |                                                                                      |                                                              |
|---------------|--------------------------------------------------------------------------------------------------|------|--------------------------------------------------------------------------------------------------------------------------------------------------------------------------------------------------------------------------------------------------------------------------------------------------------------------------------------------------|------------------------------------------------------------------------------------------------------------------------------|---------------------------------------------------------------------------------------------------------------------------------------------------------------------------------------------------------------------------------------------------------------------------------------------------------------------------------------------------------------------------------------------------------------------------------------------------------------------------------|--------------------------------------------------------------------------------------------------------------------------------------------------------------------------------------------------------------------------------------------------------------------------------------------------|----------------------------------------------------------------------------------|--------------------------------------------------------------------------------------|--------------------------------------------------------------|
| rs18699<br>59 | 10_TxEnh5<br>(MUS.SKLT.F; MUS.LEG.FET;<br>11_TxEnh3<br>MUS.TRNK.FET;<br>18_EnhAc<br>GI.STMC.FET) | None | IPSC.15b;<br>BLD.CD3.PPC;<br>BLD.CD4.CD25.CD127M.TREGPC;<br>BLD.CD4.CD25M.TPC;<br>BLD.CD4.CD25M.CD45RA.NPC;<br>BLD.CD4.CD25M.IL17M.PL.TPC;<br>BLD.CD4.NPC; BRN.HIPP.MID;<br>BRN.SUB.NIG; BRN.ANT.CAUD;<br>BRN.ANG.GYR; MUS.SKLT.F;<br>MUS.TRNK.FET; MUS.LEG.FET;<br>HRT.VNT.R; GI.S.INT.FET;<br>GI.CLN.MUC; GI.STMC.MUC;<br>PANC;                | None                                                                                                                         | LNG.IMR90;<br>ESDR.CD56.ECTO;<br>ESDR.CD184.ENDO;<br>BLD.CD4.CD25I.CD127.TME<br>MPC;<br>BLD.CD4.CD25.CD127M.TRE<br>GPC; BLD.CD4.CD25M.TPC;<br>BLD.CD4.CD25M.CD45RA.N<br>PC;<br>BLD.CD4.CD25M.IL17M.PL.T<br>PC;<br>BLD.CD4.CD25M.IL17P.PL.T<br>PC;<br>BLD.CD4.CD25M.CD45RO.M<br>PC; BLD.CD4.MPC;<br>BLD.CD4.NPC;<br>BLD.MOB.CD34.PC.F;<br>SKIN.PEN.FRISK.FIB.02;<br>BRN.HIPP.MID;<br>BRN.SUB.NIG;<br>BRN.CING.GYR;<br>MUS.SKLT.F;<br>MUS.TRNK.FET;<br>MUS.LEG.FET;<br>HRT.VNT.R; | ESC.H1;<br>BRST.MYO;<br>BRN.ANG.GYR;<br>MUS.SKLT.M;<br>HRT.FET;                                                                                                                                                                                                                                  | H3K4me1<br>MUS.HSM<br>MT;<br><br>H3K27ac<br>MUS.HSM<br>MT;<br>BLD.CD14.<br>MONO  | H3K4me<br>3<br><br>None<br><br>H3K9ac<br>CRVX.HE<br>LAS3.CN<br>CR;<br>MUS.HS<br>MMT; |                                                              |
| rs93623<br>0  | 11_TxEnh3<br>(SKIN.PEN.FRISK.FIB.02)                                                             | None | IPSC.DF.19.11;<br>ESDR.H1.BMP4.TROP;<br>ESDR.H1.MSC;<br>BLD.PER.MONUC.PC;<br>BLD.CD3.PPC;<br>BLD.CD4.CD25M.CD45RA.NPC;<br>SKIN.PEN.FRISK.FIB.01;<br>SKIN.PEN.FRISK.KER.03;<br>THYM.FET; MUS.SKLT.F;<br>MUS.TRNK.FET; MUS.LEG.FET;<br>GI.S.INT.FET; GI.L.INT.FET;<br>GI.RECT.MUC.29;<br>GI.STMC.MUC; GI.DUO.MUC;<br>GI.ESO; GI.STMC.GAST;<br>SPLN | IPSC.DF.19.11;<br>ESDR.H1.NEU<br>R.PROG;<br>ESDR.H1.MSC;<br>SKIN.PEN.FRIS<br>K.FIB.02;<br>SKIN.PEN.FRIS<br>K.MEL.01;<br>SPLN | ESDR.CD184.ENDO;<br>BLD.CD3.PPC;<br>BLD.CD4.CD25I.CD127.TME<br>MPC;<br>BLD.CD4.CD25.CD127M.TRE<br>GPC; BLD.CD4.CD25M.TPC;<br>BLD.CD4.CD25M.CD45RA.N<br>PC;<br>BLD.CD4.CD25M.IL17M.PL.T<br>PC;<br>BLD.CD4.CD25M.IL17P.PL.T<br>PC;<br>BLD.CD4.CD25M.CD45RO.M<br>PC; BLD.CD4.MPC;<br>BLD.CD4.NPC;<br>BLD.MOB.CD34.PC.F;<br>SKIN.PEN.FRISK.FIB.01;<br>SKIN.PEN.FRISK.FIB.02;<br>SKIN.PEN.FRISK.MEL.01;<br>SKIN.PEN.FRISK.MEL.03;<br>SKIN.PEN.FRISK.KER.03;                          | IPSC.15b;<br>ESDR.H1.NEUR.<br>PROG;<br>ESDR.H1.MSC;<br>BLD.PER.MONU<br>C.PC;<br>BLD.CD4.NPC;<br>STRM.CHON.M<br>RW.DR.MSC;<br>BRST.MYO;<br>BRN.ANT.CAUD<br>;<br>BRN.CING.GYR;<br>BRN.INF.TMP;<br>BRN.ANG.GYR;<br>MUS.SKLT.F;<br>MUS.SKLT.M;<br>GI.STMC.MUS;<br>GI.RECT.MUC.2<br>9;<br>GI.DUO.MUC; | H3K4me1<br>SKIN.NHE<br>K;<br><br>H3K27ac<br>MUS.HSM<br>MT;<br>BLD.CD14.<br>MONO; | H3K4me<br>3<br>None<br><br>H3K9ac<br>CRVX.HE<br>LAS3.CN<br>CR;                       | Roadmap<br>MUS.PSOA<br>S<br><br>ENCODE<br>LIV.HEPG2.<br>CNCR |

|             |      |      |                                                                                                                                                                                                                                                                                                                                                                                                                                                                                       |           |                                                                                                                                                           |                                        |                                                                                                           |                                       |  |
|-------------|------|------|---------------------------------------------------------------------------------------------------------------------------------------------------------------------------------------------------------------------------------------------------------------------------------------------------------------------------------------------------------------------------------------------------------------------------------------------------------------------------------------|-----------|-----------------------------------------------------------------------------------------------------------------------------------------------------------|----------------------------------------|-----------------------------------------------------------------------------------------------------------|---------------------------------------|--|
|             |      |      |                                                                                                                                                                                                                                                                                                                                                                                                                                                                                       |           | THYM; BRN.HIPP.MID;<br>BRN.SUB.NIG;<br>BRN.CING.GYR;<br>MUS.SKLT.F;<br>MUS.TRNK.FET;<br>HRT.VNT.R;<br>GI.CLN.SM.MUS;<br>GI.S.INT; GI.RECT.MUC.29;<br>LNG; |                                        |                                                                                                           |                                       |  |
|             |      |      |                                                                                                                                                                                                                                                                                                                                                                                                                                                                                       |           |                                                                                                                                                           |                                        |                                                                                                           |                                       |  |
| rs1637365   | None | None | None                                                                                                                                                                                                                                                                                                                                                                                                                                                                                  | None      | None                                                                                                                                                      | None                                   | H3K4me1<br><br>H3K27ac                                                                                    | H3K4me3<br><br>H3K9ac                 |  |
|             |      |      |                                                                                                                                                                                                                                                                                                                                                                                                                                                                                       |           |                                                                                                                                                           |                                        |                                                                                                           |                                       |  |
| rs181337095 | None | None | None                                                                                                                                                                                                                                                                                                                                                                                                                                                                                  | None      | None                                                                                                                                                      | None                                   | H3K4me1<br>BRN.NHA;<br>BONE.OST<br>EO<br><br>H3K27ac                                                      | H3K4me3<br><br>H3K9ac                 |  |
|             |      |      |                                                                                                                                                                                                                                                                                                                                                                                                                                                                                       |           |                                                                                                                                                           |                                        |                                                                                                           |                                       |  |
| rs60381548  | None | None | BLD.CD3.PPC;<br>BLD.CD4.CD25I.CD127.TMEMPC;<br>BLD.CD4.CD25.CD127M.TREGPC;<br>BLD.CD4.CD25M.TPC;<br>BLD.CD4.CD25M.CD45RA.NPC;<br>BLD.CD4.CD25M.IL17M.PL.TPC;<br>BLD.CD4.CD25M.IL17P.PL.TPC;<br>BLD.CD4.CD25M.CD45RO.MPC;<br>BLD.CD4.MPC; BLD.CD8.MPC;<br>BLD.CD4.NPC; BLD.CD8.NPC;<br>BLD.CD56.PC;<br>SKIN.PEN.FRSK.KER.03;<br>BRST.HMEC.35; BRST.MYO;<br>BRN.DL.PRFRTNL.CRTX;<br>MUS.PSOAS; MUS.SKLT.F;<br>HRT.VENT.L; HRT.VNT.R;<br>VAS.AOR; GI.DUO.SM.MUS;<br>GI.STMC.MUS; GI.ESO; | GI.S.INT; | ESC.H9; ESC.HUES6;<br>BLD.CD4.CD25.CD127M.TREGPC;<br>BLD.CD4.CD25M.IL17M.PL.TPC;<br>BLD.CD8.MPC;<br>GI.STMC.GAST; LNG;                                    | ESDR.H1.NEUR.<br>PROG;<br>ESDR.H1.MSC; | H3K4me1<br>None<br><br>H3K27ac<br>BLD.CD14.<br>MONO;<br>SKIN.NHE<br>K;<br>LNG.NHLF<br>;<br>BONE.OST<br>EO | H3K4me3<br>None<br><br>H3K9ac<br>None |  |

|  |  |  |                                            |  |  |  |  |  |  |
|--|--|--|--------------------------------------------|--|--|--|--|--|--|
|  |  |  | GI.STMC.GAST; LNG.FET; OVRY;<br>PANC; LNG; |  |  |  |  |  |  |
|--|--|--|--------------------------------------------|--|--|--|--|--|--|

\*Highlighted in yellow are breast tissues; in red are the 25-state model active enhancers and promoters and DNase for the breast tissues

## Roadmap tissues

LNG.IMR90 IMR90 fetal lung fibroblasts Cell Line; ESC.WA7 ES-WA7 Cells; ESC.H9 H9 Cells; ESC.I3 ES-I3 Cells; ESC.HUES6 HUES6 Cells; ESC.HUES48 HUES48 Cells; ESC.HUES64 HUES64 Cells; ESC.H1 H1 Cells; ESC.4STAR ES-UCSF4 Cells; IPSC.20B IPS-20b Cells; IPSC.18 IPS-18 Cells; IPSC.15b IPS-15b Cells; IPSC.DF.6.9 IPS DF 6.9 Cells; IPSC.DF.19.11 IPS DF 19.11 Cells; ESDR.H1.NEUR.PROG H1 Derived Neuronal Progenitor Cultured Cells; ESDR.H9.NEUR.PROG H9 Derived Neuronal Progenitor Cultured Cells; ESDR.H9.NEUR H9 Derived Neuron Cultured Cells; ESDR.CD56.MESO hESC Derived CD56+ Mesoderm Cultured Cells; ESDR.CD56.ECTO hESC Derived CD56+ Ectoderm Cultured Cells; ESDR.CD184.ENDO hESC Derived CD184+ Endoderm Cultured Cells; ESDR.H1.BMP4.MESO H1 BMP4 Derived Mesendoderm Cultured Cells; ESDR.H1.BMP4.TROP H1 BMP4 Derived Trophoblast Cultured Cells; ESDR.H1.MSC H1 Derived Mesenchymal Stem Cells; BLD.PER.MONUC.PC Primary mononuclear cells from peripheral blood; BLD.CD3.PPC Primary T cells from peripheral blood; BLD.CD4.CD251.CD127.TMEMPC Primary T cells effector/memory enriched from peripheral blood; BLD.CD3.CPC Primary T cells from cord blood; BLD.CD4.CD25.CD127M.TREGPC Primary T regulatory cells from peripheral blood; BLD.CD4.CD25M.TPC Primary T helper cells from peripheral blood; LD.CD4.CD25M.CD45RA.NPC Primary T helper naive cells from peripheral blood; BLD.CD4.CD25M.IL17M.PL.TPC Primary T helper cells PMA-I stimulated; BLD.CD4.CD25M.IL17P.PL.TPC Primary T helper 17 cells PMA-I stimulated; BLD.CD4.CD25M.CD45RO.MPC Primary T helper memory cells from peripheral blood 1; BLD.CD4.MPC Primary T helper memory cells from peripheral blood 2; BLD.CD8.MPC Primary T CD8+ memory cells from peripheral blood; BLD.CD4.NPC Primary T helper naive cells from peripheral blood; LD.CD8.NPC Primary T CD8+ naive cells from peripheral blood; BLD.CD14.PC Primary monocytes from peripheral blood; BLD.CD19.CPC Primary B cells from cord blood; BLD.CD34.PC Primary hematopoietic stem cells; BLD.MOB.CD34.PC.M Primary hematopoietic stem cells G-CSF-mobilized Male; BLD.MOB.CD34.PC.F Primary hematopoietic stem cells G-CSF-mobilized Female; BLD.CD34.CC Primary hematopoietic stem cells short term culture; BLD.CD19.PPC Primary B cells from peripheral blood; BLD.CD56.PC Primary Natural Killer cells from peripheral blood; BLD.CD15.PC Primary neutrophils from peripheral blood; STRM.MRW.MSC Bone Marrow Derived Cultured Mesenchymal Stem Cells; STRM.CHON.MRW.DR.MSC Mesenchymal Stem Cell Derived Chondrocyte Cultured Cells; FAT.ADIP.DR.MSC Adipose Derived Mesenchymal Stem Cell Cultured Cells; FAT.MSC.DR.ADIP Mesenchymal Stem Cell Derived Adipocyte Cultured Cells; MUS.SAT Muscle Satellite Cultured Cells; SKIN.PEN.FRSK.FIB.01 Foreskin Fibroblast Primary Cells skin01; SKIN.PEN.FRSK.FIB.02 Foreskin Fibroblast Primary Cells skin02; SKIN.PEN.FRSK.MEL.01 Foreskin Melanocyte Primary Cells skin01; SKIN.PEN.FRSK.MEL.03 Foreskin Melanocyte Primary Cells skin03; SKIN.PEN.FRSK.KER.02 Foreskin Keratinocyte Primary Cells skin02; SKIN.PEN.FRSK.KER.03 Foreskin Keratinocyte Primary Cells skin03; BRST.HMEC.35 Breast variant Human Mammary Epithelial Cells (vHMEC); BRST.MYO Breast Myoepithelial Primary Cells; BRN.GANGEM.DR.NRSPHR Ganglion Eminence derived primary cultured neurospheres; BRN.CRTX.DR.NRSPHR Cortex derived primary cultured neurospheres; THYM Thymus; THYM.FET Fetal Thymus; BRN.HIPP.MID Brain Hippocampus Middle; BRN.SUB.NIG Brain Substantia Nigra; BRN.ANT.CAUD Brain Anterior Caudate; BRN.CING.GYR Brain Cingulate Gyrus; BRN.INF.TMP Brain Inferior Temporal Lobe; BRN.ANG.GYR Brain Angular Gyrus; BRN.DL.PRFRTL.CRTX Brain\_Dorsolateral\_Prefrontal\_Cortex; BRN.GRM.MTRX Brain Germinal Matrix; BRN.FET.F Fetal Brain Female; BRN.FET.M Fetal Brain Male; FAT.ADIP.NUC Adipose Nuclei; MUS.PSOAS Psoas Muscle; MUS.SKLT.F Skeletal Muscle Female; MUS.SKLT.M Skeletal Muscle Male; MUS.TRNK.FET Fetal Muscle Trunk; MUS.LEG.FET Fetal Muscle Leg; HRT.FET Fetal Heart; HRT.ATR.R Right Atrium; HRT.VENT.L Left Ventricle; HRT.VNT.R Right Ventricle; VAS.AOR Aorta; GI.DUO.SM.MUS; Duodenum Smooth Muscle; GI.CLN.SM.MUS Colon Smooth Muscle; GI.RECT.SM.MUS Rectal Smooth Muscle; GI.STMC.MUS Stomach Smooth Muscle; GI.STMC.FET Fetal Stomach; GI.S.INT.FET Fetal Intestine Small; GI.L.INT.FET Fetal Intestine Large; GI.S.INT Small Intestine; GI.CLN.SIG Sigmoid Colon; GI.CLN.MUC Colonic Mucosa; GI.RECT.MUC.29 Rectal Mucosa Donor 29; GI.RECT.MUC.31 Rectal Mucosa Donor 31; GI.STMC.MUC Stomach Mucosa; GI.DUO.MUC Duodenum Mucosa; GI.ESO Esophagus; GI.STMC.GAST Gastric; PLCNT.AMN Placenta Amnion; KID.FET Fetal Kidney; LNG.FET Fetal Lung; OVRY Ovary; PANC.ISLT Pancreatic Islets; ADRL.GLND.FET Fetal Adrenal Gland; PLCNT.FET Placenta; LIV.ADLT Liver; PANC Pancreas; LNG Lung; SPLN Spleen

## ENCODE tissues

LNG.A549.ETOH002.CNCR A549 EtOH 0.02pct Lung Carcinoma Cell Line; BLD.DND41.CNCR Dnd41 TCell Leukemia Cell Line; BLD.GM12878 GM12878 Lymphoblastoid Cells; CRVX.HELAS3.CNCR HeLa-S3 Cervical Carcinoma Cell Line; LIV.HEPG2.CNCR HepG2 Hepatocellular Carcinoma Cell Line; BRST.HMEC HMEC Mammary Epithelial Primary Cells; MUS.HSMM HSMM Skeletal Muscle Myoblasts Cells; MUS.HSMMT HSMM cell derived Skeletal Muscle Myotubes Cells; VAS.HUVEC HUVEC Umbilical Vein Endothelial Primary Cells; BLD.K562.CNCR K562 Leukemia Cells; BLD.CD14.MONO Monocytes-

CD14+ RO01746 Primary Cells; BRN.NHA NH-A Astrocytes Primary Cells; SKIN.NHDFAD NHDF-Ad Adult Dermal Fibroblast Primary Cells; SKIN.NHEK NHEK-Epidermal Keratinocyte Primary Cells; LNG.NHLF NHLF Lung Fibroblast Primary Cells; BONE.OSTEO Osteoblast Primary Cells

**Description of the 25-state model using 12 imputed marks**

TssA Active TSS; PromU Promoter Upstream TSS; PromD1 Promoter Downstream TSS 1; PromD2 Promoter Downstream TSS 2; Tx5<sup>+</sup> Transcribed - 5' preferential; Tx Strong transcription; Tx3<sup>+</sup> Transcribed - 3' preferential; TxWk Weak transcription; TxReg Transcribed & regulatory (Prom/Enh); TxEnh5<sup>+</sup> Transcribed 5' preferential and Enh; TxEnh3<sup>+</sup> Transcribed 3' preferential and Enh; TxEnhW Transcribed and Weak Enhancer; EnhA1 Active Enhancer 1; EnhA2 Active Enhancer 2; EnhAF Active Enhancer Flank; EnhW1 Weak Enhancer 1; EnhW2 Weak Enhancer 2; EnhAc Primary H3K27ac possible Enhancer; DNase Primary DNase; ZNF/Rpts ZNF genes & repeats; Het Heterochromatin; PromP Poised Promoter; PromBiv Bivalent Promoter; ReprPC Repressed Polycomb; Quies Quiescent/Low.

Supplementary Table S8. Evaluation of identified SNPs in Latino GWAS

| Index SNPs                                                                             | Chr | Position    | Test            | Other           | Locus   | TAF* in Latino | Overall breast cancer risk |      | ER+ breast cancer  |      | ER- breast cancer  |      | GWA in discovery study |
|----------------------------------------------------------------------------------------|-----|-------------|-----------------|-----------------|---------|----------------|----------------------------|------|--------------------|------|--------------------|------|------------------------|
|                                                                                        |     |             |                 |                 |         |                | OR (95% CI)                | P    | OR (95% CI)        | P    | OR (95% CI)        | P    |                        |
| rs17024629                                                                             | 1   | 110,179,756 | T               | C               | 1p13.3  | 0.094          | 0.99 (0.87 - 1.13)         | 0.91 | 1.04 (0.87 - 1.24) | 0.68 | 0.90 (0.67 - 1.22) | 0.51 | Overall                |
| rs67931591                                                                             | 1   | 215,330,292 | G               | GCTGAGG-CAGGAGA | 1q41    | 0.637          | 1.00 (0.93 - 1.08)         | 0.98 | 1.02 (0.91 - 1.13) | 0.77 | 0.93 (0.78 - 1.10) | 0.41 | ER negative            |
| rs2522057                                                                              | 5   | 131,801,947 | C               | G               | 5q31.1  | 0.728          | 0.98 (0.90 - 1.07)         | 0.63 | 1.00 (0.88 - 1.12) | 0.94 | 1.05 (0.87 - 1.27) | 0.62 | Overall                |
| rs1637365                                                                              | 7   | 74,359,358  | T               | C               | 7q11.23 | 0.225          | 1.06 (0.97 - 1.16)         | 0.19 | 1.10 (0.98 - 1.25) | 0.11 | 0.96 (0.78 - 1.18) | 0.67 | ER negative            |
| rs1869959                                                                              | 15  | 75,147,332  | A               | C               | 15q24.1 | 0.311          | 0.96 (0.88 - 1.03)         | 0.26 | 0.92 (0.82 - 1.03) | 0.13 | 0.96 (0.80 - 1.15) | 0.65 | Overall                |
| rs60381548                                                                             | 15  | 75,728,474  | CA              | C               | 15q24.2 | 0.266          | 0.97 (0.89 - 1.06)         | 0.52 | 0.99 (0.88 - 1.11) | 0.85 | 0.86 (0.71 - 1.04) | 0.11 | Overall                |
| rs181337095                                                                            | 15  | 100,907,094 | A               | G               | 15q26.3 | 0.866          | 0.92 (0.82 - 1.03)         | 0.13 | 0.94 (0.81 - 1.09) | 0.41 | 0.80 (0.64 - 1.01) | 0.06 | ER negative            |
| <b>SNPs in same loci as index SNPs and independently associated with breast cancer</b> |     |             |                 |                 |         |                |                            |      |                    |      |                    |      |                        |
| rs5780828                                                                              | 1   | 215,416,434 | TA              | T               | 1q41    | 0.135          | 1.09 (0.98 - 1.22)         | 0.11 | 1.16 (1.00 - 1.34) | 0.05 | 1.01 (0.80 - 1.29) | 0.91 | ER negative            |
| rs116363925                                                                            | 1   | 109,926,599 | T               | G               | 1p13.3  | 0.028          | 0.82 (0.61 - 1.11)         | 0.20 | 0.89 (0.61 - 1.29) | 0.53 | 0.72 (0.36 - 1.45) | 0.36 | Overall                |
| 5:132149322:-<br>G:GGCCGC-<br>CGCC                                                     | 5   | 132,149,322 | GGCCG-<br>CCGCC | G               | 5q31.1  | 0.143          | 1.04 (0.93 - 1.16)         | 0.53 | 1.02 (0.88 - 1.18) | 0.83 | 1.07 (0.84 - 1.35) | 0.60 | Overall                |
| rs117793215                                                                            | 15  | 100,535,681 | T               | C               | 15q26.3 | 0.022          | 0.83 (0.62 - 1.12)         | 0.23 | 0.69 (0.46 - 1.05) | 0.09 | 1.41 (0.84 - 2.36) | 0.19 | Overall                |
| rs113939578                                                                            | 15  | 75,479,704  | T               | C               | 15q24.2 | 0.092          | 1.19 (1.04 - 1.36)         | 0.01 | 1.19 (0.99 - 1.42) | 0.06 | 1.34 (1.02 - 1.77) | 0.04 | Overall                |

\*TAF – Allele frequency



# Suppl Fig 1a :GWAS meta-analysis Manhattan plot for overall breast cancer risk

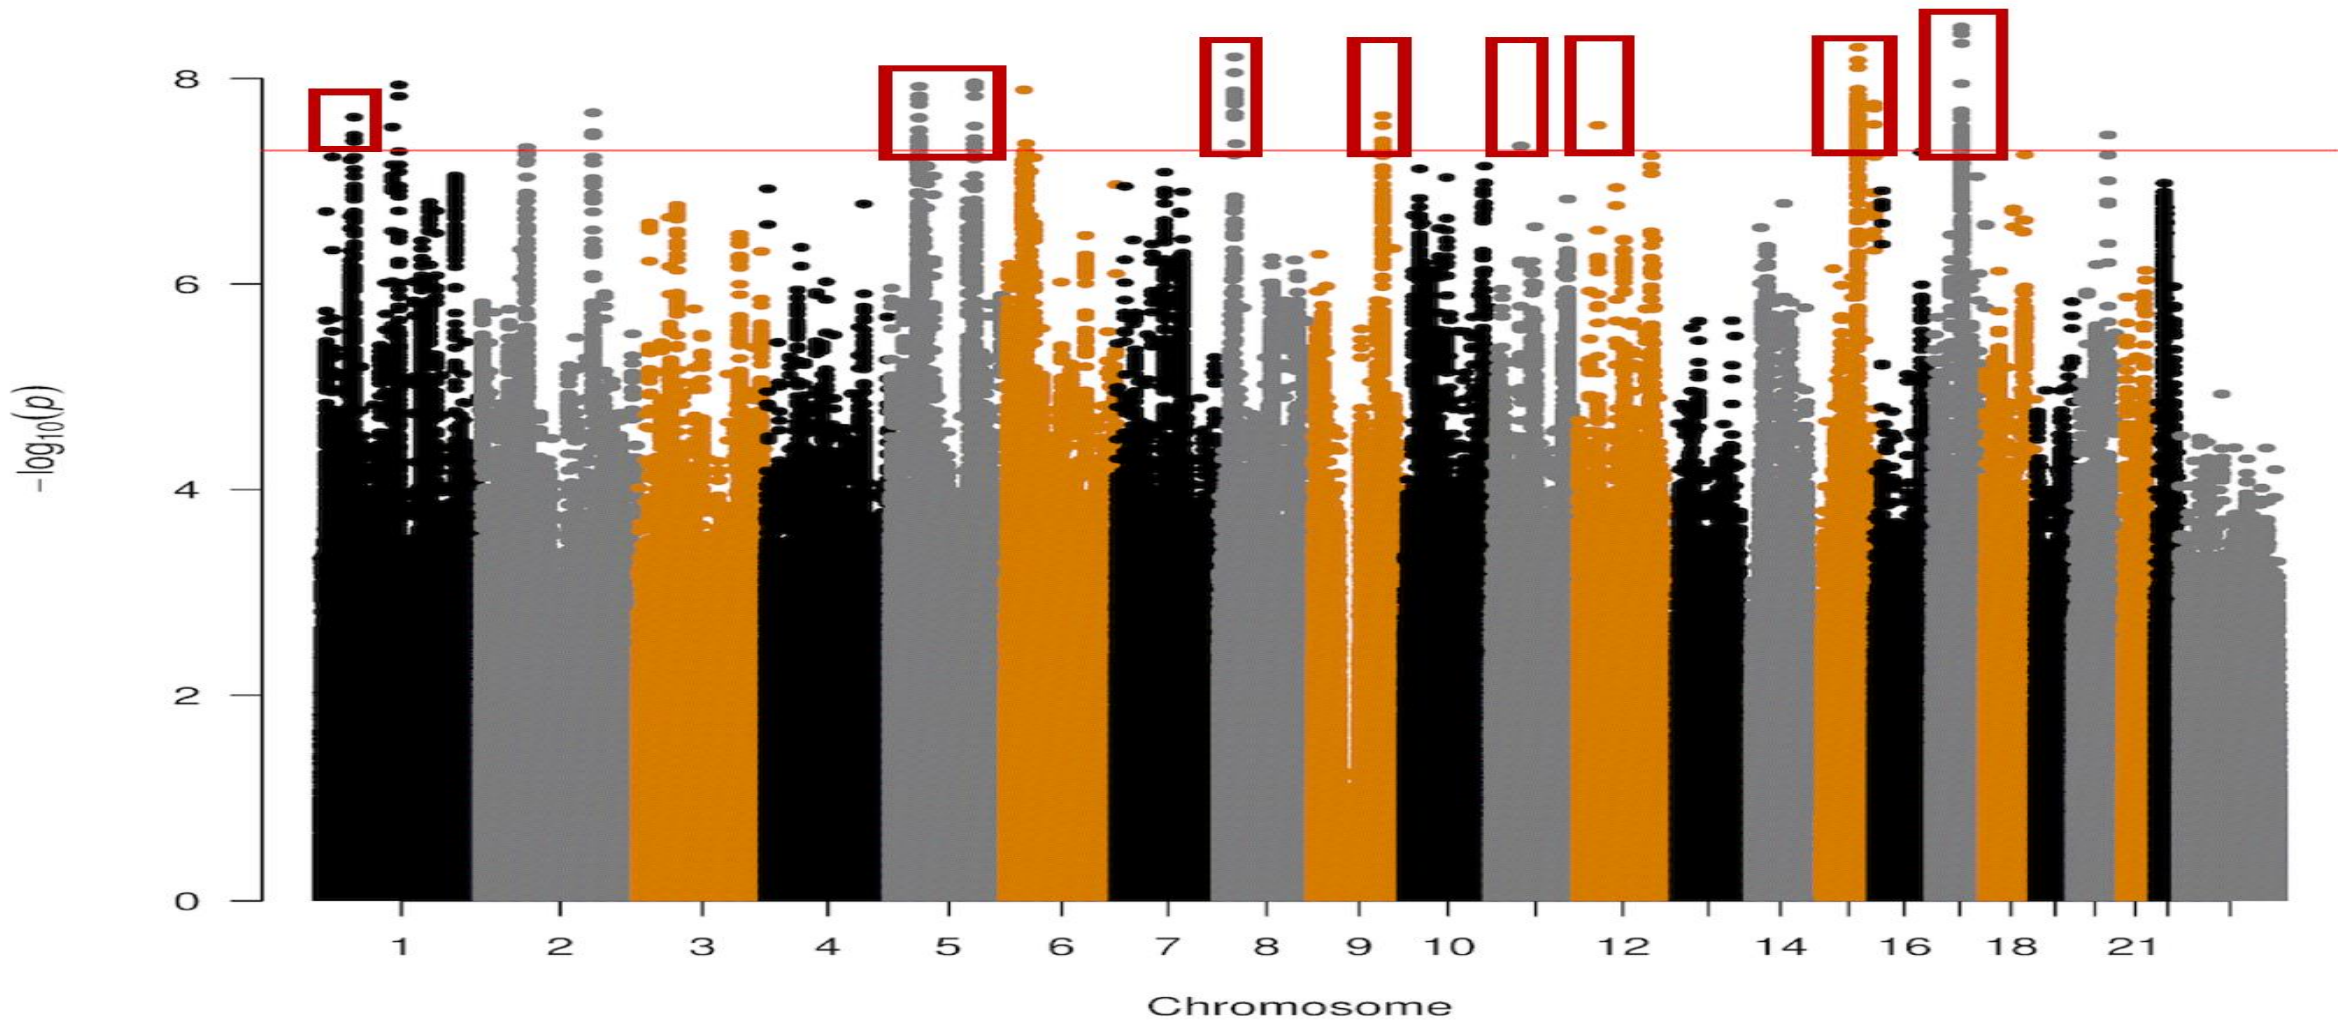

The plot shows the loci significant after removing SNPs within 500kb flank of the index SNPs at previously known breast cancer risk loci and SNPs with BCAC P-value  $< 5 \cdot 10^{-8}$ . The red rectangles show the regions with AA P value  $< 0.05$ .

# Suppl Fig 1b: GWAS meta-analysis Manhattan plot for ER negative breast cancer

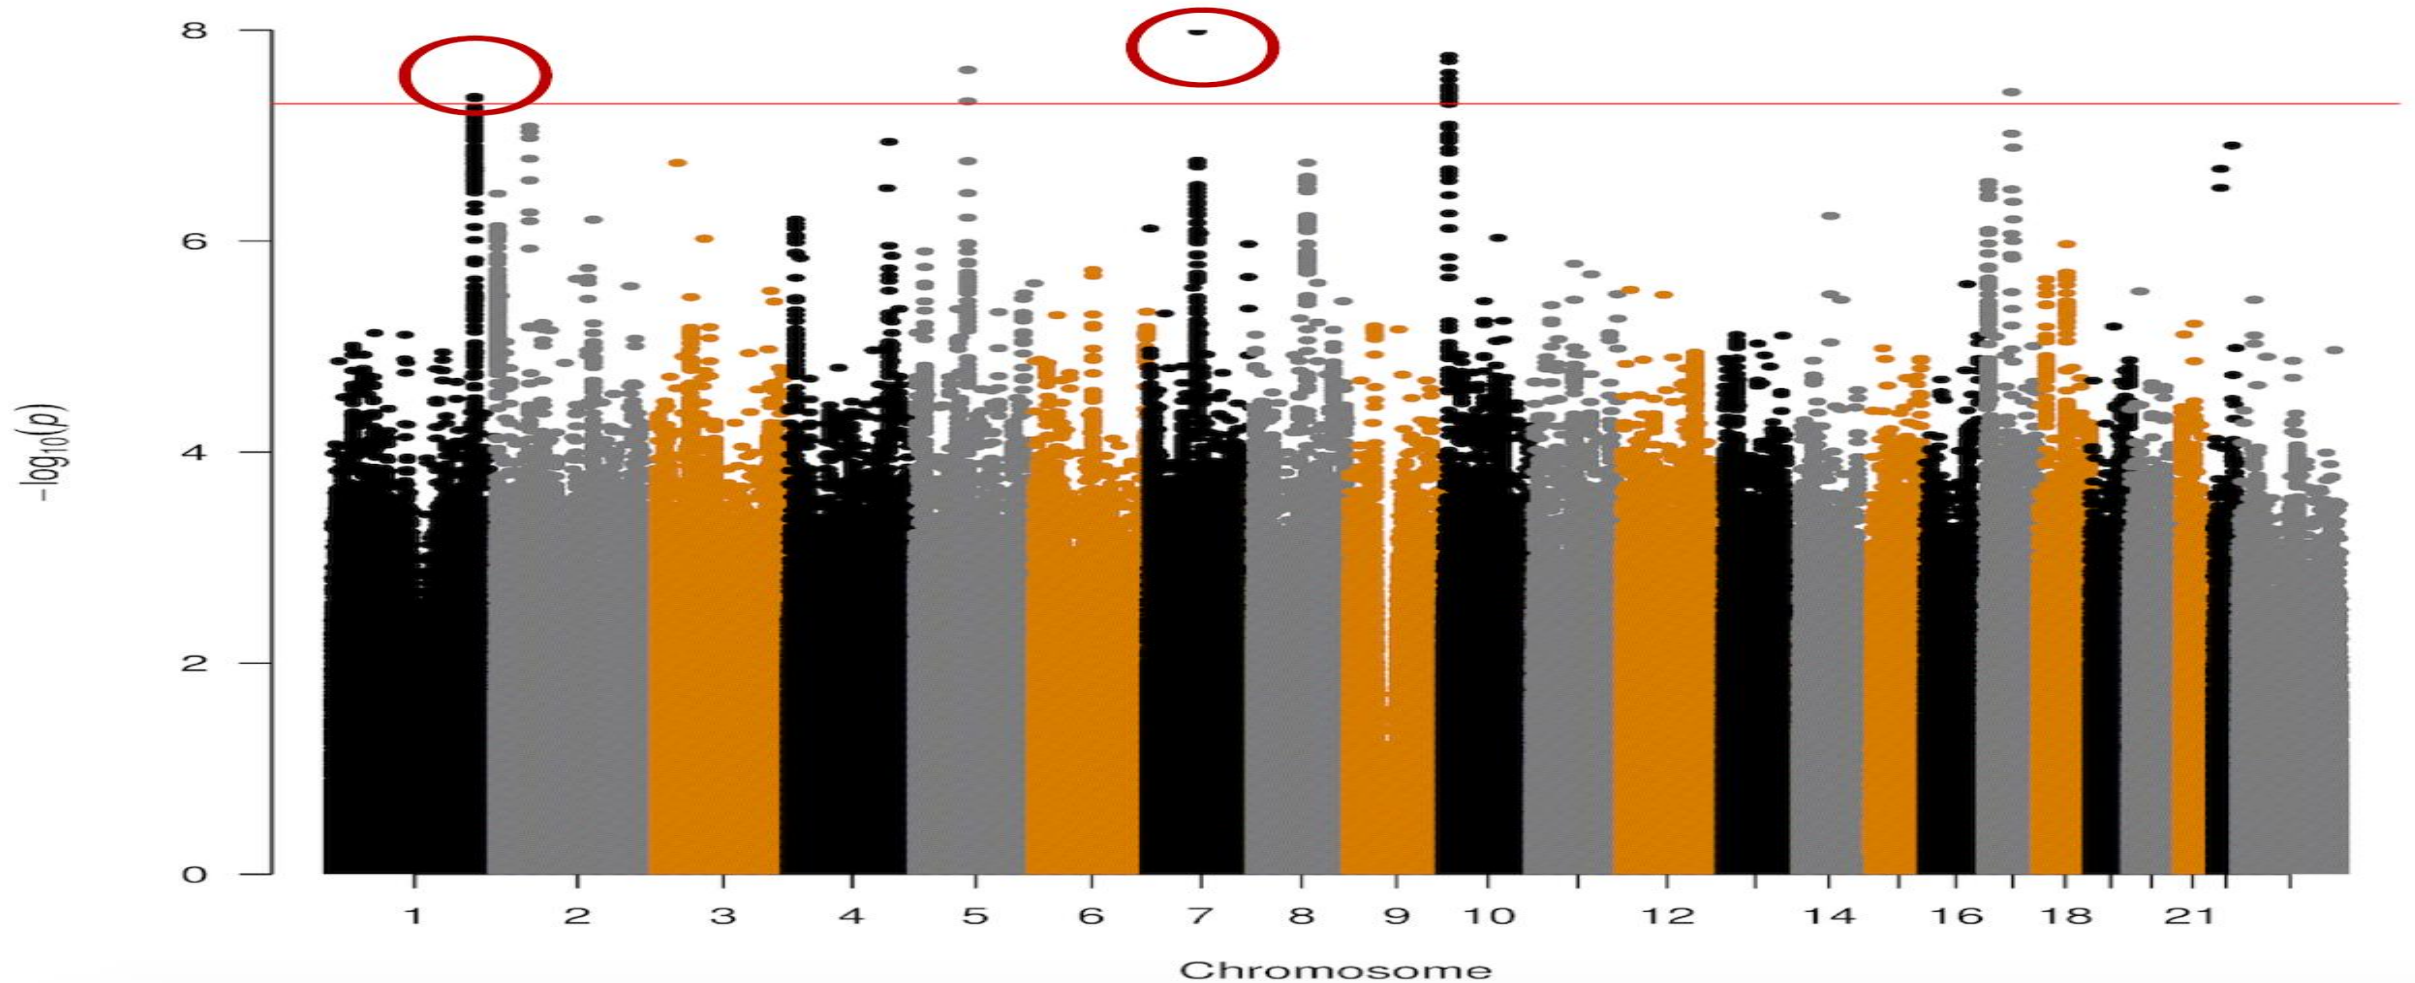

The plot shows the loci significant after removing SNPs within 500kb flank of the index SNPs at previously known breast cancer risk loci and SNPs with BCAC P-value  $< 5 \times 10^{-8}$ . The red circles show the regions with AA P value  $< 0.05$ .

# Supplementary Fig 2a

## 15q24 region - European

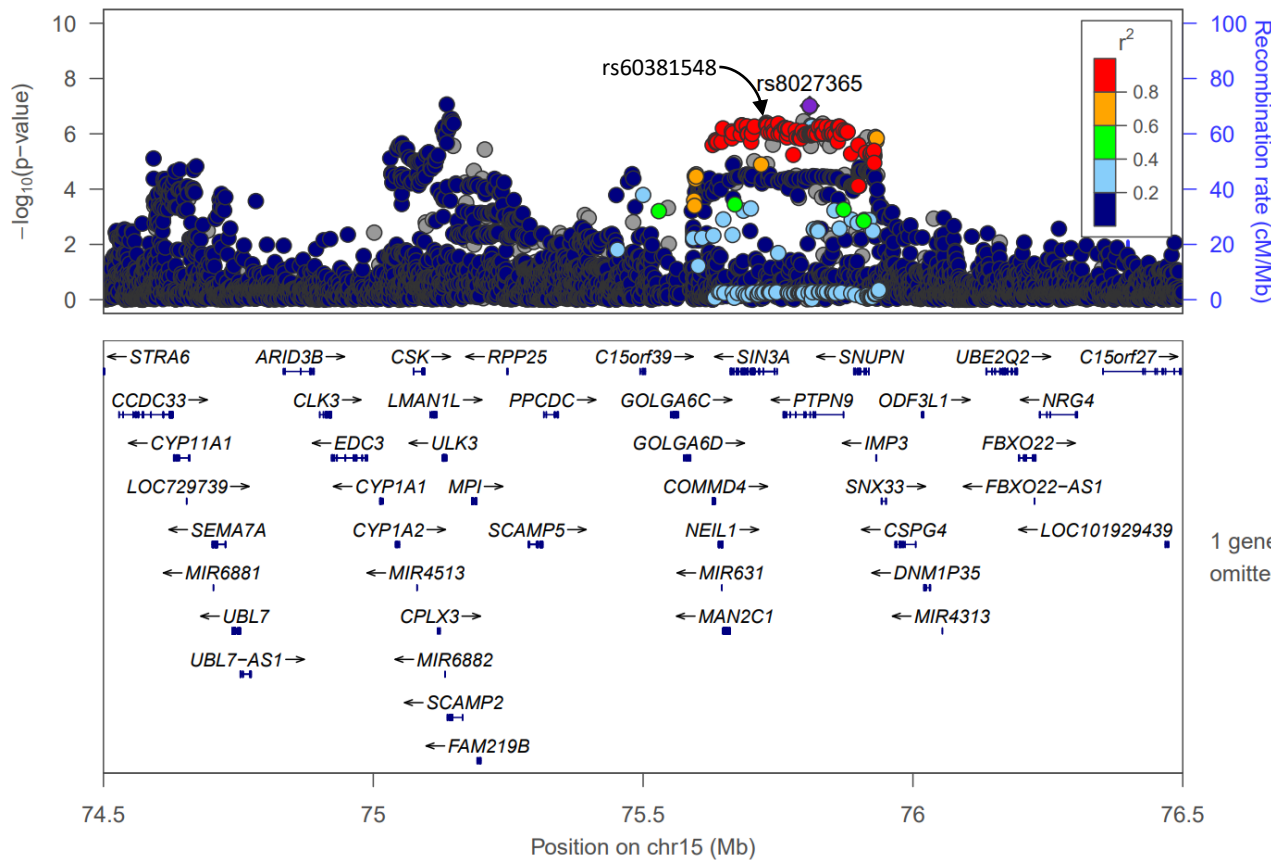

## 15q24 region - African

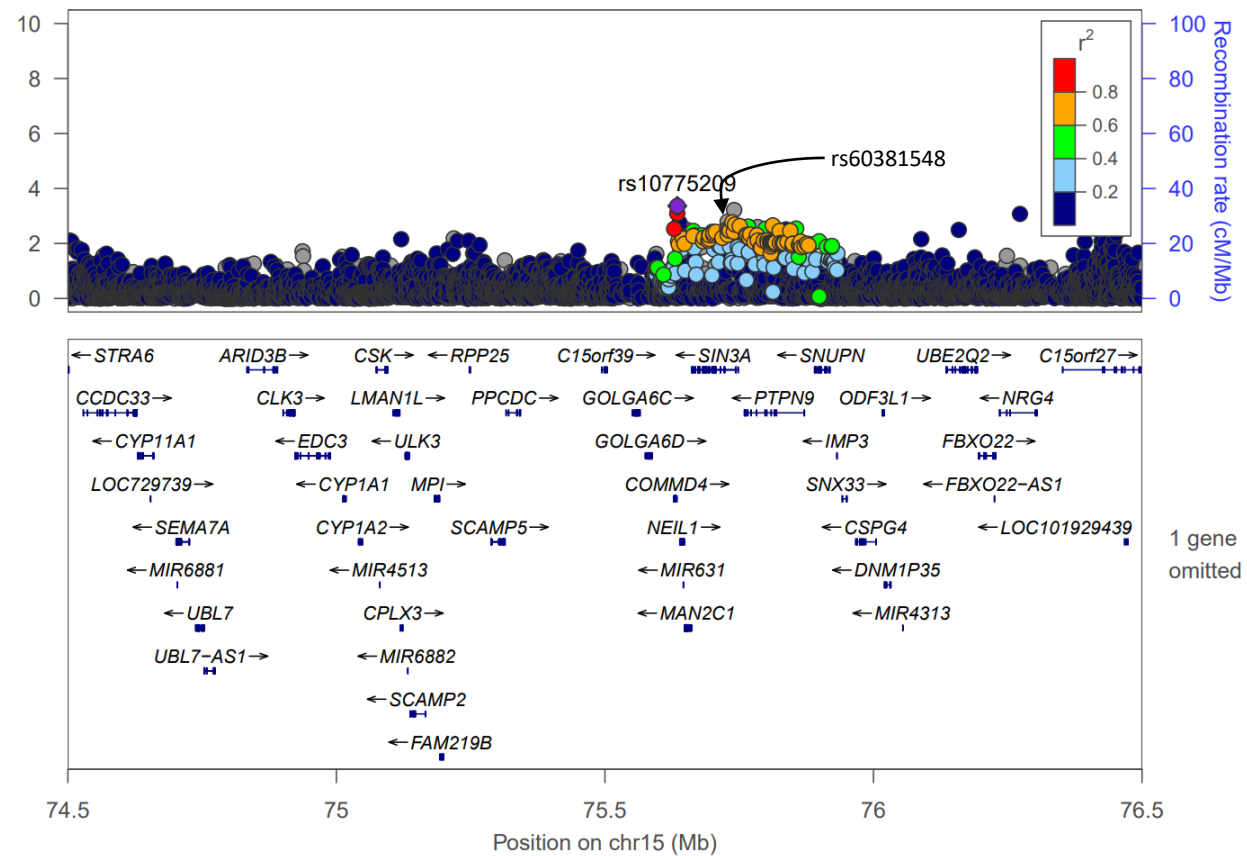



# Supplementary Fig 2b

## rs60381548 - European

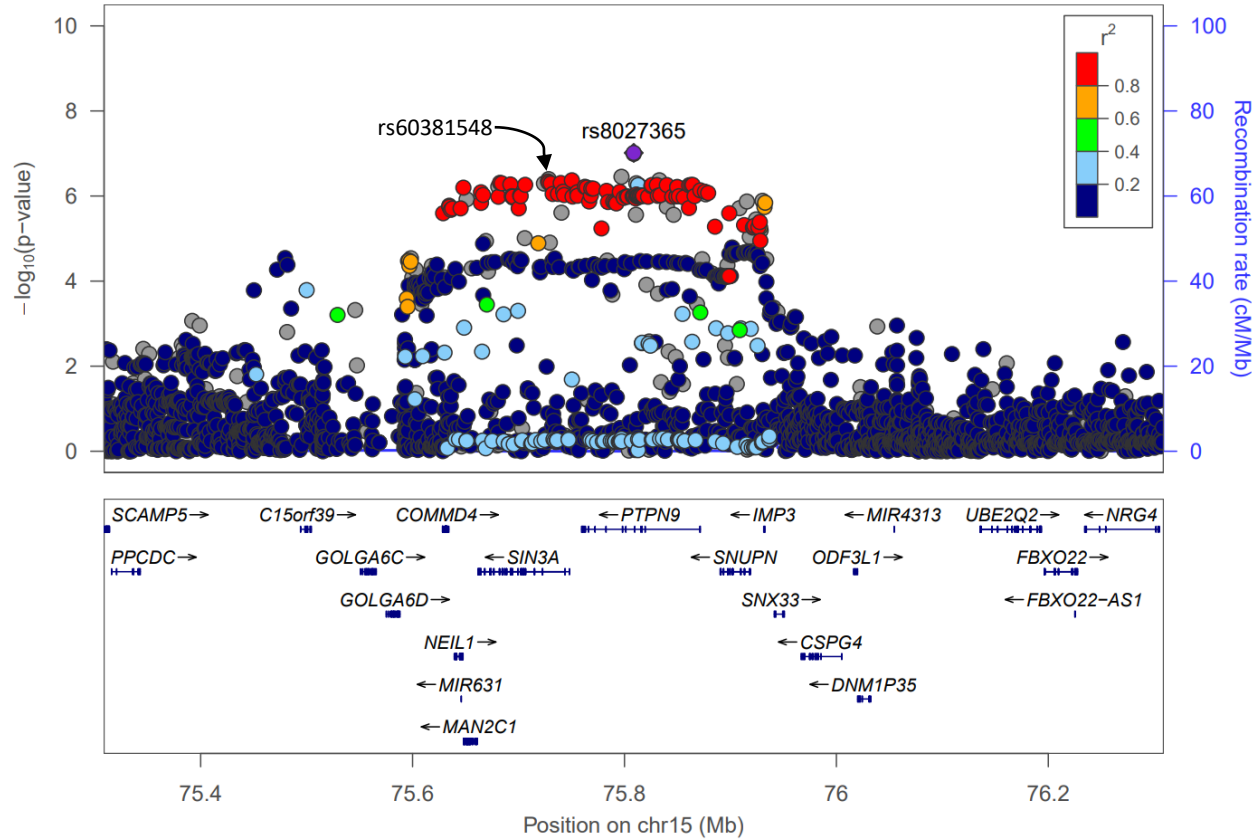

## rs60381548 - African

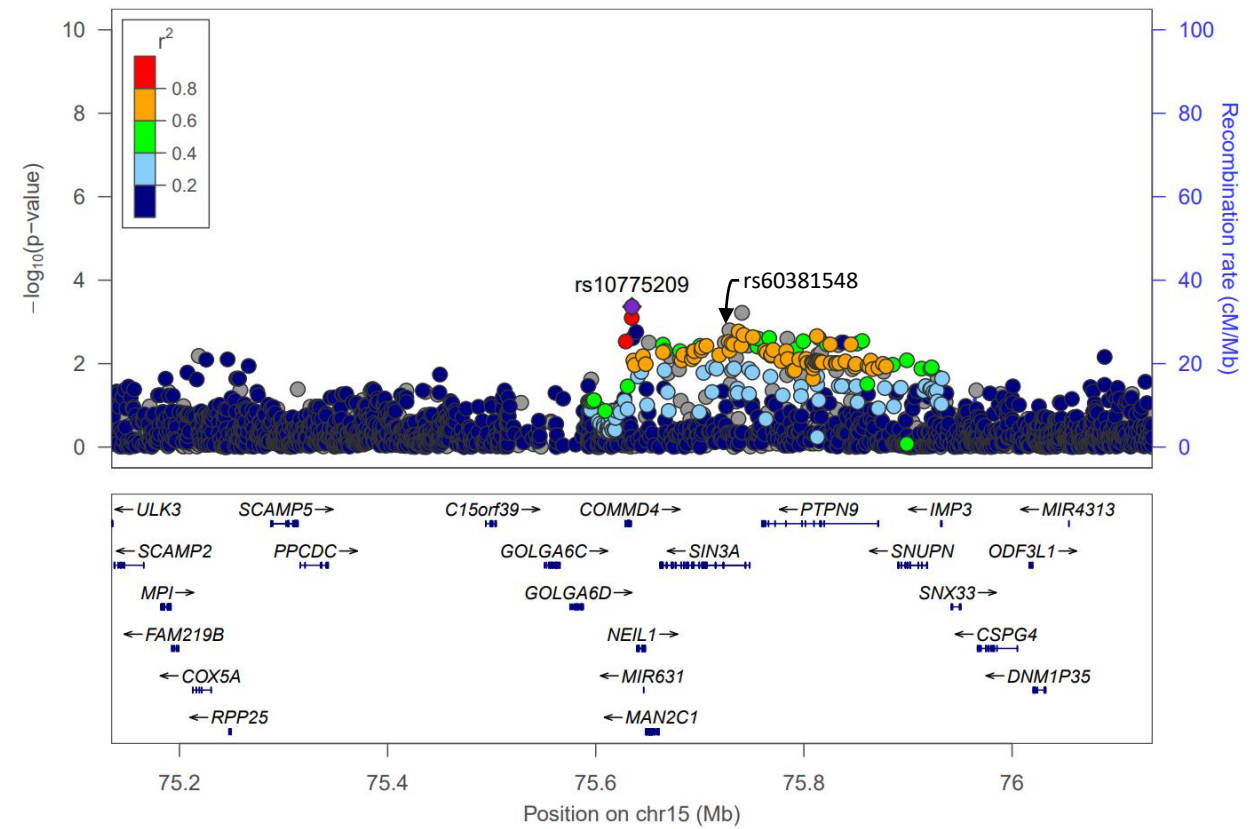

# Supplementary Fig 2c

## rs1869959 - European

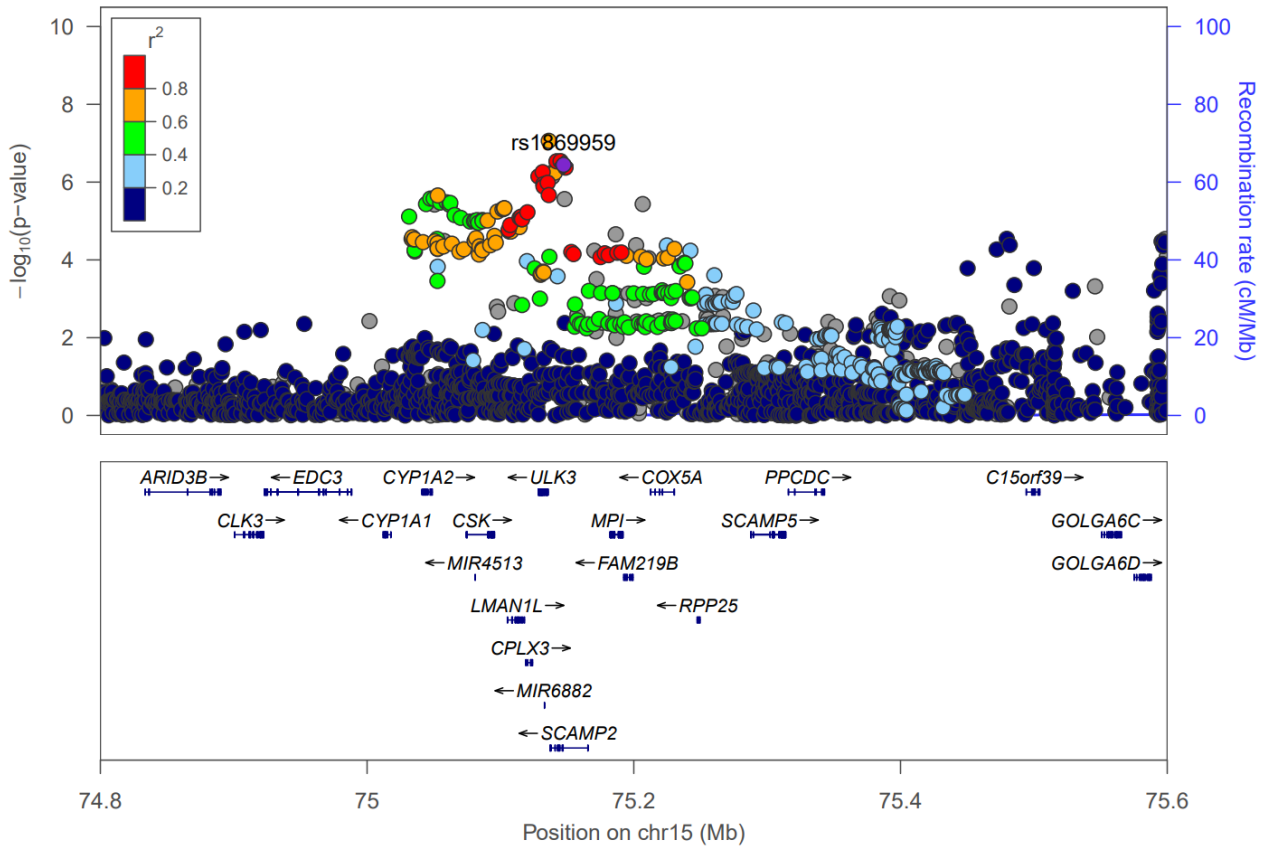

## rs1869959 - African

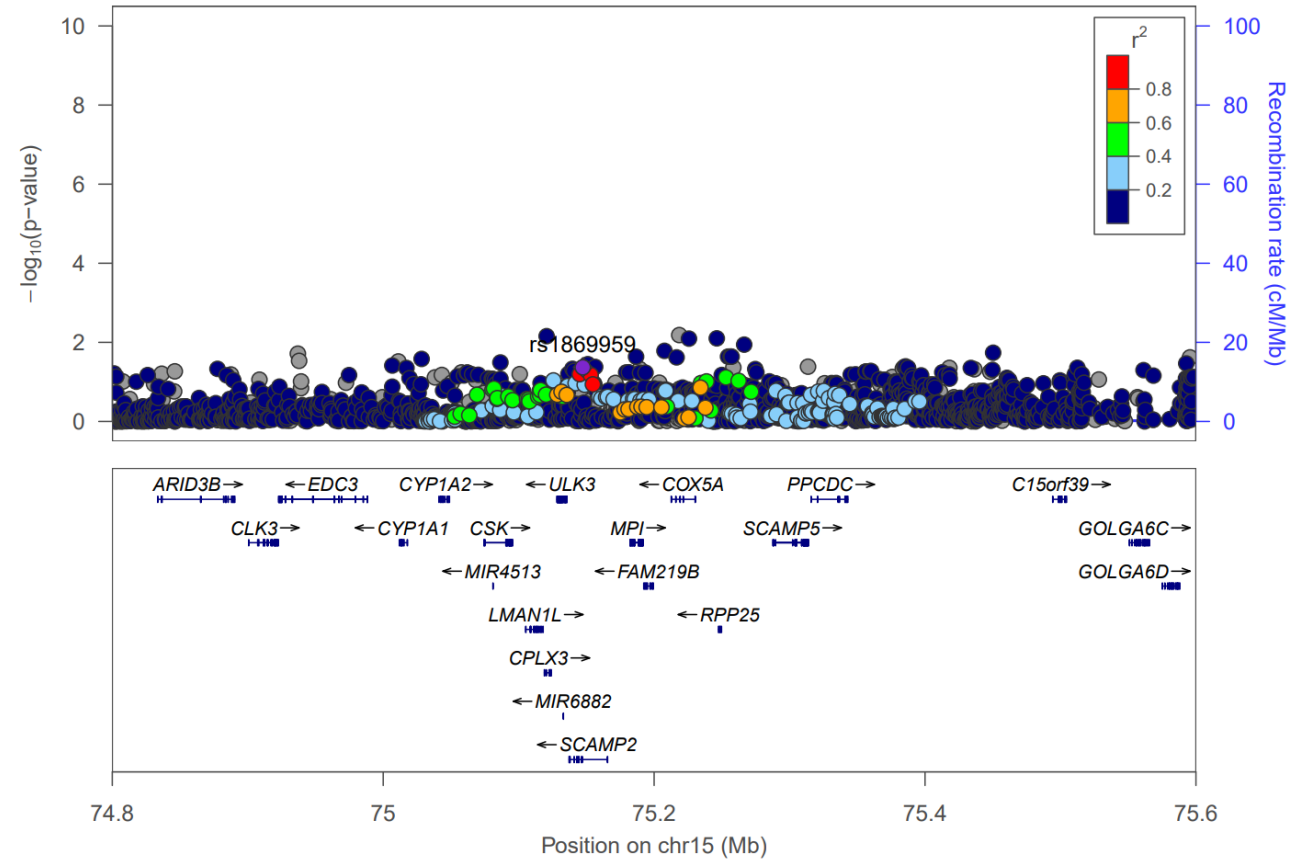

# Supplementary Fig 2d

## rs2522057 - European

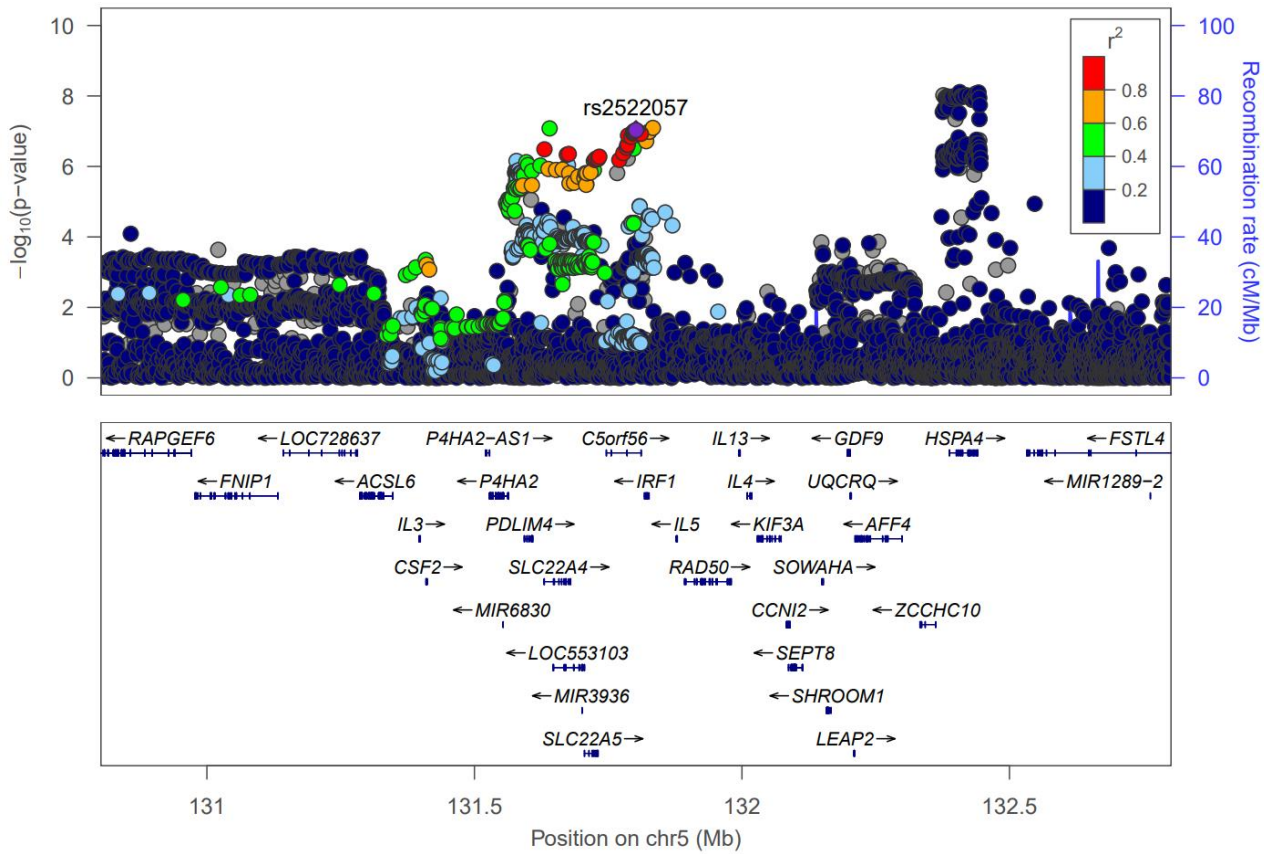

## rs2522057 - African

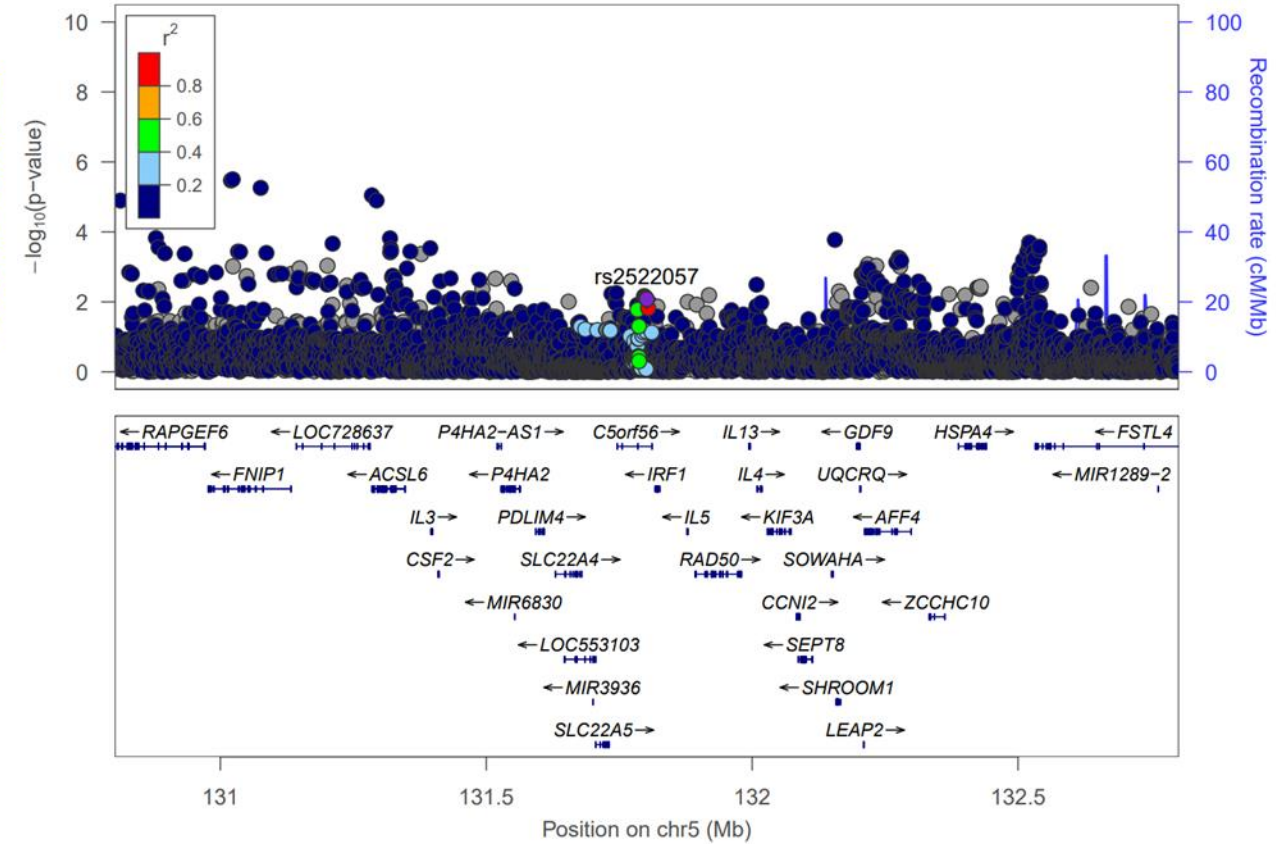

# Supplementary Fig 2e

## rs17024629 - European

## rs17024629 - African

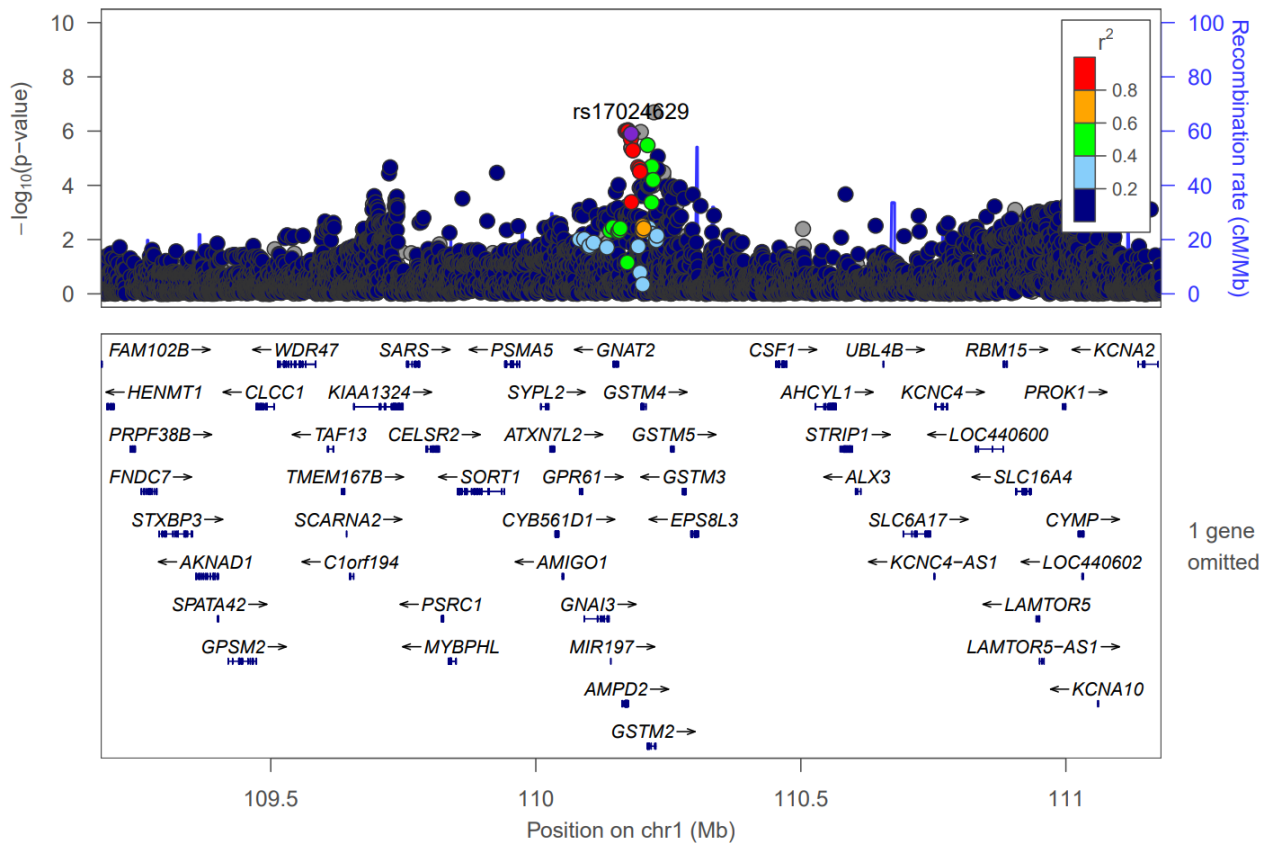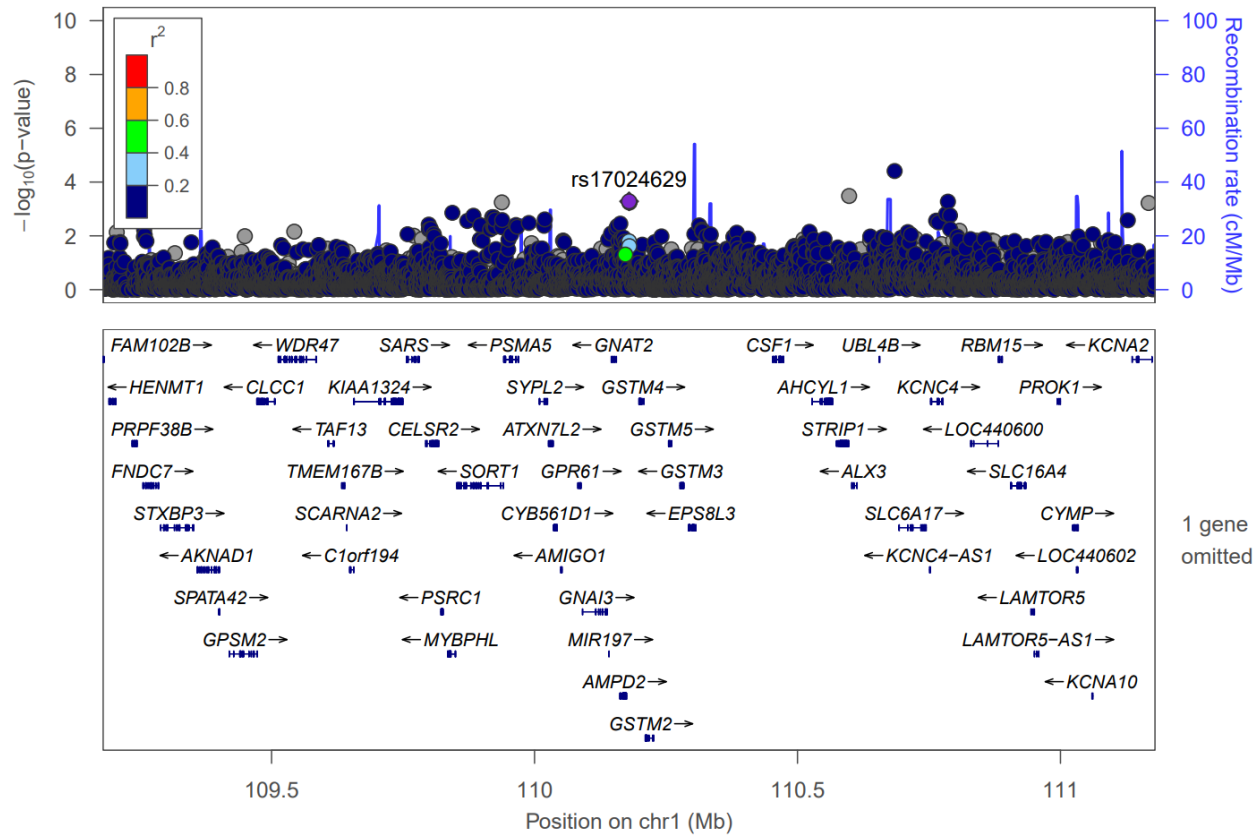



# Supplementary Fig 2f

## rs181337095 - European

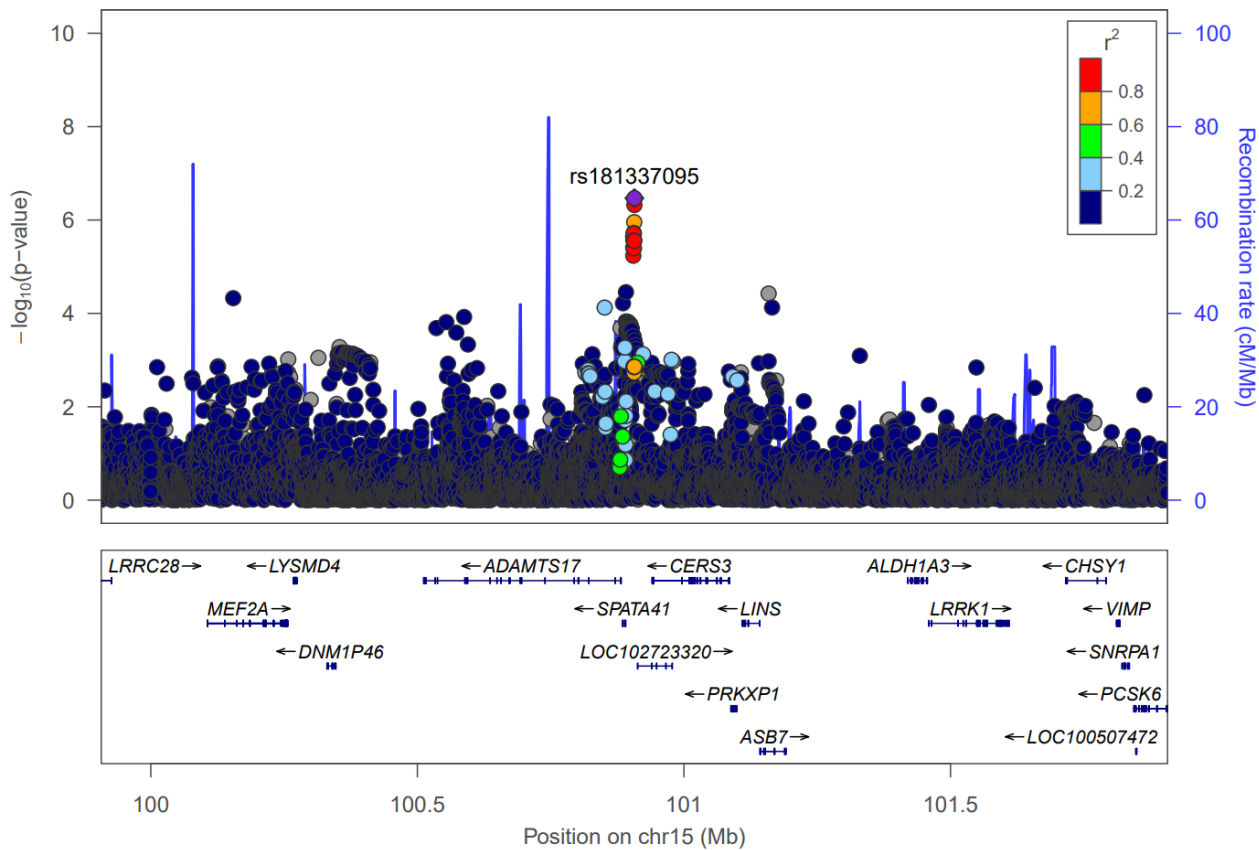

## rs181337095 - African

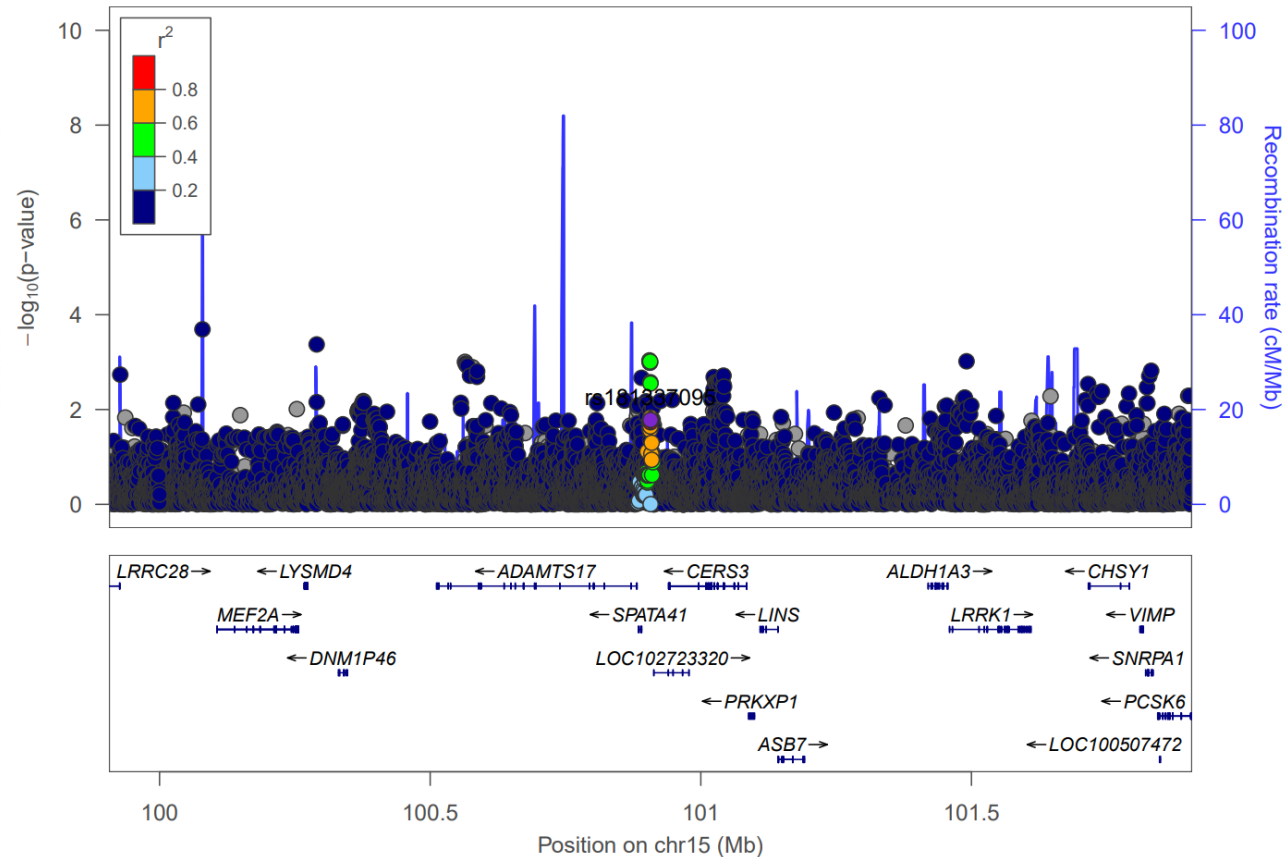



# Supplementary Fig 2g

## rs67931591 - European

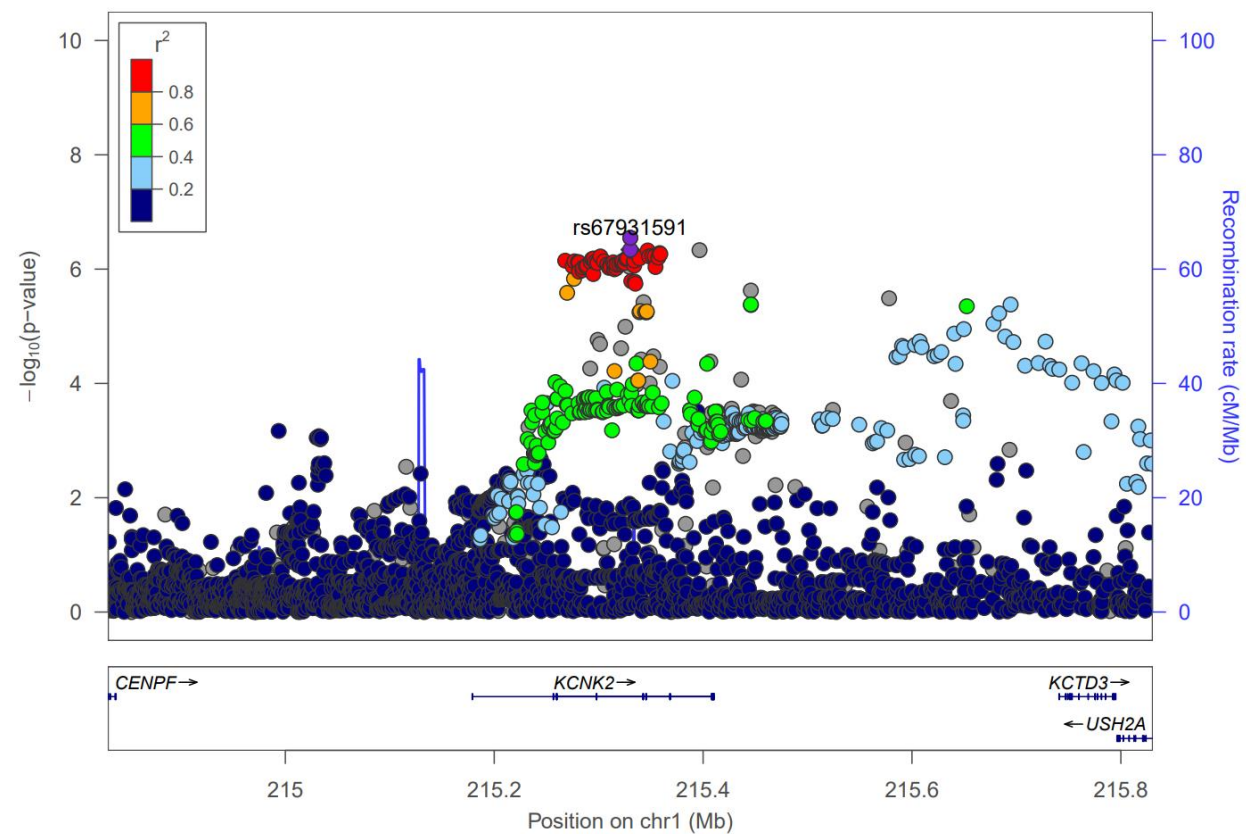

## rs67931591 - African

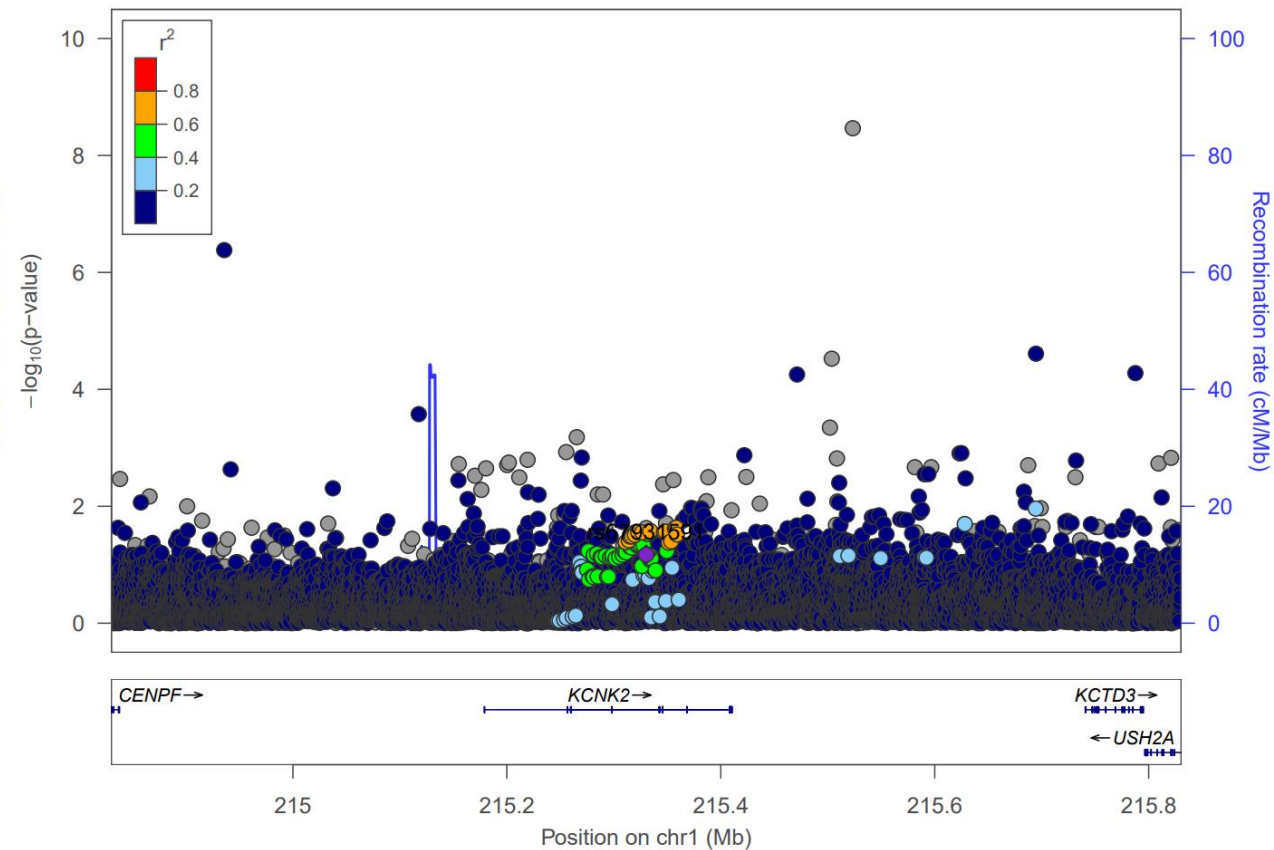

# Supplementary Fig 2h

## rs1637365 - European

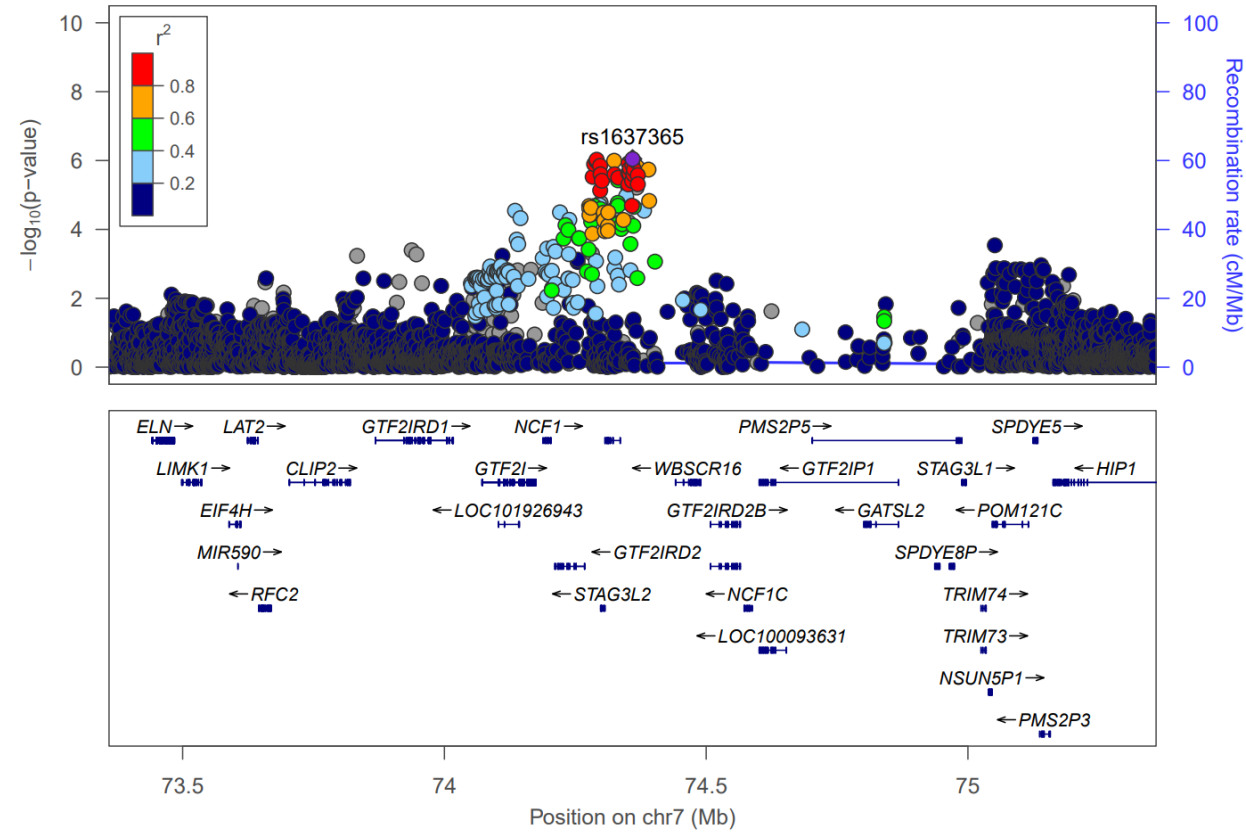

## rs1637365 - African

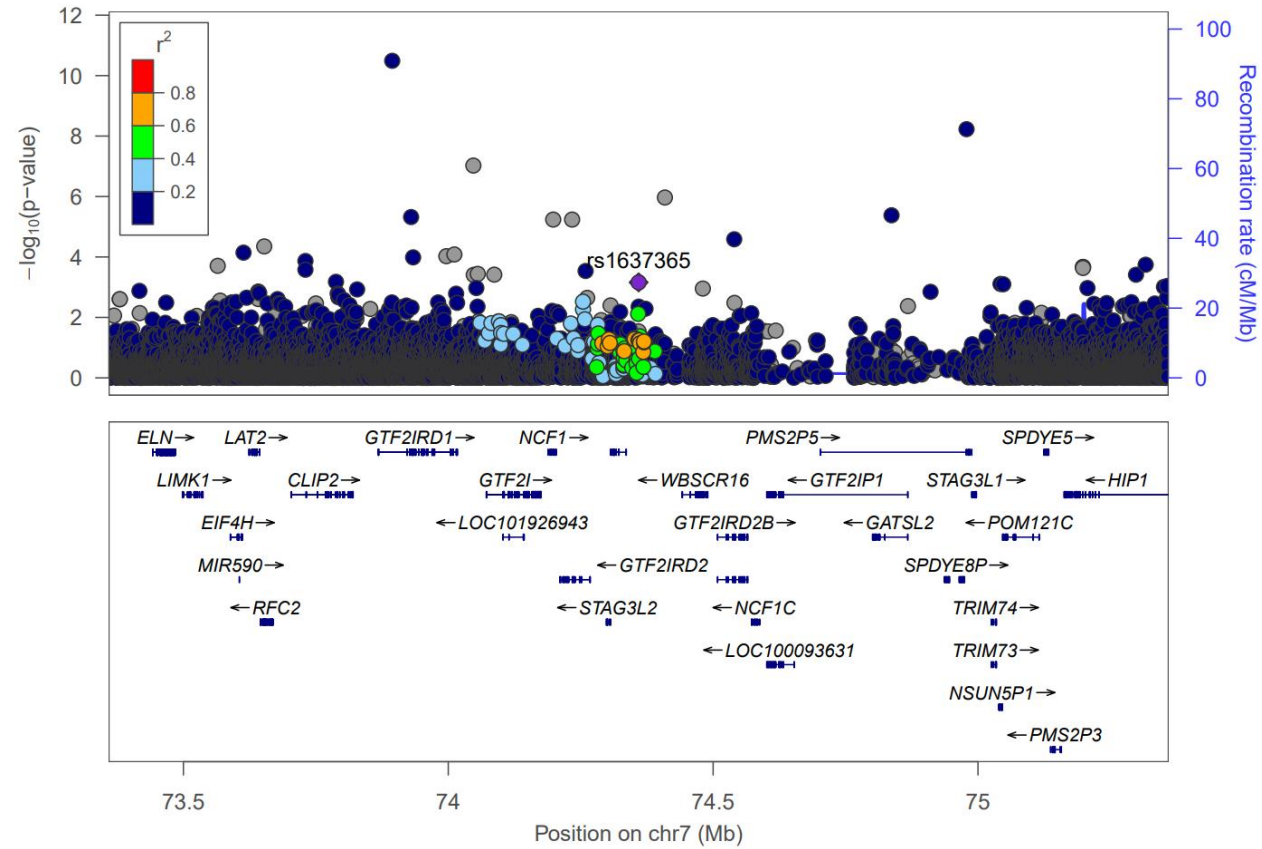

## Supplementary Fig 2: LocusZoom Plots of Candidate Loci

(a-h) are LocusZoom plots made using the online tool at locuszoom.org. Each point is a SNP where the x-axis is the chromosomal position, and the y-axis is the  $-\log_{10}(P)$  of the association between the SNP and overall breast cancer status (a-f) or ER-negative breast cancer status (g-h) [15]. The color of the point indicated the LD  $R^2$  value between the colored SNP and the index SNP indicated by a purple diamond. Plots labeled “European” are plotted over hg19/1000 Genomes Nov 2014 European reference panel. These plots depict the association in the BCAC GWAS. Plots labeled “African” are plotted over hg19/1000 Genomes Nov 2014 African reference panel. These plots depict the association in the meta-analysis of all five African Ancestries GWAS.

## Supplementary References

1. Jones AV, Tilley M, Gutteridge A, Hyde C, Nagle M, et al. GWAS of self-reported mosquito bite size, itch intensity and attractiveness to mosquitoes implicates immune-related predisposition loci. *Hum Mol Genet.* 2017 Apr 1;26(7):1391-1406. doi: 10.1093/hmg/ddx036. PMID: 28199695; PMCID: PMC5390679.
2. Astle WJ, Elding H, Jiang T, Allen D, Ruklisa D, et al. The Allelic Landscape of Human Blood Cell Trait Variation and Links to Common Complex Disease. *Cell.* 2016 Nov 17;167(5):1415-1429.e19. doi: 10.1016/j.cell.2016.10.042. PMID: 27863252; PMCID: PMC5300907.
3. Ferreira MAR, Mathur R, Vonk JM, Szwajda A, Brumpton B et al. Genetic Architectures of Childhood- and Adult-Onset Asthma Are Partly Distinct. *Am J Hum Genet.* 2019 Apr 4;104(4):665-684. doi: 10.1016/j.ajhg.2019.02.022. Epub 2019 Mar 28. PMID: 30929738; PMCID: PMC6451732.
4. Feitosa MF, Kraja AT, Chasman DI, Sung YJ, Winkler TW et al. Novel genetic associations for blood pressure identified via gene-alcohol interaction in up to 570K individuals across multiple ancestries. *PLoS One.* 2018 Jun 18;13(6):e0198166. doi: 10.1371/journal.pone.0198166. PMID: 29912962; PMCID: PMC6005576.
5. Ehret GB, Ferreira T, Chasman DI, Jackson AU, Schmidt EM, et al The genetics of blood pressure regulation and its target organs from association studies in 342,415 individuals. *Nat Genet.* 2016 Oct;48(10):1171-1184. doi: 10.1038/ng.3667. Epub 2016 Sep 12. PMID: 27618452; PMCID: PMC5042863.
6. Coronary Artery Disease (C4D) Genetics Consortium. A genome-wide association study in Europeans and South Asians identifies five new loci for coronary artery disease. *Nat Genet.* 2011 Mar 6;43(4):339-44. doi: 10.1038/ng.782. PMID: 21378988.
7. Lee JJ, Wedow R, Okbay A, Kong E, Maghzian O, et al. Gene discovery and polygenic prediction from a genome-wide association study of educational attainment in 1.1 million individuals. *Nat Genet.* 2018 Jul 23;50(8):1112-1121. doi: 10.1038/s41588-018-0147-3. PMID: 30038396; PMCID: PMC6393768.

8. Wu Y, Byrne EM, Zheng Z, Kemper KE, Yengo L, et al. Genome-wide association study of medication-use and associated disease in the UK Biobank. *Nat Commun.* 2019 Apr 23;10(1):1891. doi: 10.1038/s41467-019-09572-5. PMID: 31015401; PMCID: PMC6478889.
9. Michailidou K, Lindström S, Dennis J, Beesley J, Hui S, et al. Association analysis identifies 65 new breast cancer risk loci. *Nature.* 2017 Nov 2;551(7678):92-94. doi: 10.1038/nature24284. Epub 2017 Oct 23. PMID: 29059683; PMCID: PMC5798588.
10. Okada Y, Kamatani Y, Takahashi A, Matsuda K, Hosono N, et al. A genome-wide association study in 19 633 Japanese subjects identified LHX3-QSOX2 and IGF1 as adult height loci. *Hum Mol Genet.* 2010 Jun 1;19(11):2303-12. doi: 10.1093/hmg/ddq091. Epub 2010 Feb 26. PMID: 20189936.
11. Rieger S, McDaid A, Kutalik Z. Evaluation and application of summary statistic imputation to discover new height-associated loci. *PLoS Genet.* 2018 May 21;14(5):e1007371. doi: 10.1371/journal.pgen.1007371. PMID: 29782485; PMCID: PMC5983877.
12. Kichaev G, Bhatia G, Loh PR, Gazal S, Burch K, Freund MK, Schoech A, Pasaniuc B, Price AL. Leveraging Polygenic Functional Enrichment to Improve GWAS Power. *Am J Hum Genet.* 2019 Jan 3;104(1):65-75. doi: 10.1016/j.ajhg.2018.11.008. Epub 2018 Dec 27. PMID: 30595370; PMCID: PMC6323418.
13. Wuttke M, Li Y, Li M, Sieber KB, Feitosa MF, Gorski M, Tin A, et al. A catalog of genetic loci associated with kidney function from analyses of a million individuals. *Nat Genet.* 2019 Jun;51(6):957-972. doi: 10.1038/s41588-019-0407-x. Epub 2019 May 31. PMID: 31152163; PMCID: PMC6698888.
14. Kichaev G, Bhatia G, Loh PR, Gazal S, Burch K, Freund MK, Schoech A, Pasaniuc B, Price AL. Leveraging Polygenic Functional Enrichment to Improve GWAS Power. *Am J Hum Genet.* 2019 Jan 3;104(1):65-75. doi: 10.1016/j.ajhg.2018.11.008. Epub 2018 Dec 27. PMID: 30595370; PMCID: PMC6323418.
15. Pruim RJ, Welch RP, Sanna S, Teslovich TM, Chines PS, Gliedt TP, et al. LocusZoom : Regional visualization of genome wide association scan results. *Bioinformatics.* 2011;27(13):2336-2337. PMID: 20634204
